# Supplementary material for: Iron-mediated reactions of gem-dihaloalkanes with α,β-unsaturated carbonyl compounds
Source: Royal Society of Chemistry journal article supplement (doi:10.1039/d6sc01614f), 2026-05-11

*Supplementary Information*

**Iron-mediated Reactions of *gem*-Dihaloalkanes with  $\alpha,\beta$ -Unsaturated Carbonyl Compounds**

Guangshen Wang,<sup>a</sup> Jing Yao,<sup>a</sup> Jianwei Liu,<sup>a</sup> Tiantian Zhang,<sup>b</sup> Xue Cheng,<sup>a</sup> Li Li,<sup>a</sup> Manyi Han,<sup>c</sup>  
Baosheng Li<sup>a,b\*</sup>

<sup>a</sup>. *School of Chemistry and Chemical Engineering, Chongqing University, 174 Shazheng Street, Chongqing, 400044, China.*

<sup>b</sup>. *State Key Laboratory of Natural Product Chemistry, Lanzhou University, Lanzhou 730000, China*

<sup>c</sup>. *Anhui Provincial Key Laboratory of Synthetic Chemistry and Applications, Huaibei Normal University, Huaibei, Anhui 235000, P. R. China*

\* E-mail: [libs@cqu.edu.cn](mailto:libs@cqu.edu.cn)

## Table of Content

|      |                                                                                                         |    |
|------|---------------------------------------------------------------------------------------------------------|----|
| 1.   | General Methods .....                                                                                   | 2  |
| 2.   | The Preparation of Substrates .....                                                                     | 3  |
| 2.1  | General procedure A: The synthesis of $\alpha,\beta$ -unsaturated ketones <b>1f</b> and <b>1o</b> ..... | 4  |
| 2.2  | General procedure A: The synthesis of $\alpha,\beta$ -unsaturated ketones <b>1y</b> and <b>1z</b> ..... | 4  |
| 2.3  | General procedure B: The synthesis of $\alpha,\beta$ -unsaturated aldehydes <b>1ad–1af</b> .....        | 4  |
| 2.4  | General procedure C: The synthesis of $\alpha,\beta$ -unsaturated aldehydes <b>1ah–1an</b> .....        | 5  |
| 2.5  | General procedure D: The synthesis of enones <b>1aq–1be</b> .....                                       | 6  |
| 2.6  | General procedure E: The synthesis of <i>gem</i> -dichloroalkane <b>2b</b> .....                        | 6  |
| 2.7  | General procedure F: The synthesis of <i>gem</i> -dichloroalkane <b>2c</b> .....                        | 6  |
| 3.   | Conditions Screening for the Synthesis of <b>3a</b> and <b>4a</b> .....                                 | 7  |
| 4.   | The Synthesis of <b>3</b> .....                                                                         | 8  |
| 4.1  | General procedure G: The synthesis of $\beta,\gamma$ -unsaturated ketones or aldehydes <b>3</b> .....   | 8  |
| 4.2  | General procedure H: The synthesis of dihydrofurans <b>3'</b> .....                                     | 8  |
| 4.3  | General procedure I: The synthesis of cyclopropanes <b>4</b> .....                                      | 8  |
| 5.   | The Gram-scale Reactions .....                                                                          | 9  |
| 5.1  | The gram-scale synthesis of <b>3b</b> .....                                                             | 9  |
| 5.2  | The gram-scale synthesis of <b>3a'</b> .....                                                            | 9  |
| 5.3  | The gram-scale synthesis of <b>4a</b> .....                                                             | 9  |
| 6.   | The Synthetic Transformation of <b>3b</b> .....                                                         | 10 |
| 6.1  | The synthesis of <b>3b-1</b> .....                                                                      | 10 |
| 6.2  | The synthesis of <b>3b-2</b> .....                                                                      | 10 |
| 7.   | The Synthetic Transformation of <b>3w-1</b> .....                                                       | 10 |
| 8.   | The Synthetic Transformation of <b>3o</b> .....                                                         | 10 |
| 9.   | Control Experiments .....                                                                               | 11 |
| 10.  | Characterization Data .....                                                                             | 12 |
| 10.1 | Characterization data for $\alpha,\beta$ -unsaturated ketones <b>1</b> .....                            | 12 |
| 10.2 | Characterization data for <i>gem</i> -dichloroalkane <b>2</b> .....                                     | 12 |
| 10.3 | Characterization data for $\beta,\gamma$ -unsaturated ketones <b>3</b> .....                            | 12 |
| 10.4 | Characterization data for aldehydes or alcohols <b>3</b> .....                                          | 16 |
| 10.5 | Characterization data for Dihydrofuran Products <b>3'</b> .....                                         | 19 |
| 10.6 | Characterization data for Cyclopropane Products <b>4</b> .....                                          | 23 |
| 10.7 | Characterization data for products of synthetic transformations .....                                   | 27 |
| 10.8 | Characterization data for products of control experiments .....                                         | 28 |
| 11.  | Proposed Mechanism for the Formation of <b>7</b> .....                                                  | 30 |
| 12.  | References .....                                                                                        | 32 |
| 13.  | NMR Spectra .....                                                                                       | 34 |

## 1. General Methods

Unless otherwise stated, all reactions were conducted under an argon atmosphere with continuous magnetic stirring. Prior to use, all glassware was thoroughly oven-dried. Reagents and solvents were procured from commercial suppliers and used as received, unless otherwise specified. Dichloromethane was dried over calcium hydride, while tetrahydrofuran was purified by distillation over sodium metal with benzophenone as an indicator.

Reaction progress was monitored by thin-layer chromatography (TLC) using silica gel GF254 plates, observed under UV light ( $\lambda = 254$  nm or 365 nm) or stained with phosphomolybdic acid or 2,4-dinitrophenylhydrazine. Target compounds were isolated by column chromatography using silica gel (200–300 mesh).

Newly synthesized compounds were characterized using nuclear magnetic resonance (NMR) spectroscopy, infrared (IR) spectroscopy, and high-resolution mass spectrometry (HRMS). NMR spectra were recorded on a Bruker 400 spectrometer ( $^1\text{H}$  at 400 MHz,  $^{13}\text{C}$  at 101 MHz, and  $^{19}\text{F}$  at 377 MHz), with tetramethylsilane or  $\text{CDCl}_3$  as internal standards for chemical shift calibration. Chemical shifts are reported in parts per million (ppm), and coupling constants ( $J$ ) are given in hertz (Hz). Splitting patterns are described as singlet (s), doublet (d), triplet (t), quartet (q), multiplet (m), doublet of doublets (dd), or triplet of doublets (td).

IR spectra were collected using a Thermo Fisher Nicolet iN10 FM-IR spectrometer, employing potassium bromide plates as the medium. High-resolution mass spectrometry (HRMS) data were acquired on a time-of-flight (TOF) mass spectrometer equipped with electrospray ionization (ESI, positive mode).

## 2. The Preparation of Substrates

The substrates **1a–1d**, **1f**, **1g**, **1m**, **1o–1v**, **1y**, **1z**, **1aj**, **1an**, **1av–1ay** were commercially available. **1e**,<sup>[1]</sup> **1h**,<sup>[1]</sup> **1i**,<sup>[2]</sup> **1j**,<sup>[3]</sup> **1k**,<sup>[4]</sup> **1l**,<sup>[5]</sup> **1n**,<sup>[6]</sup> **1x**,<sup>[7]</sup> **1aa–1ac**,<sup>[8]</sup> **1ad**,<sup>[9]</sup> **1ae**,<sup>[8]</sup> **1af**,<sup>[10]</sup> **1ah**,<sup>[8]</sup> **1ak**,<sup>[11]</sup> **1al**,<sup>[12]</sup> **1am**,<sup>[13]</sup> **1ao–1as**,<sup>[14]</sup> **1at**,<sup>[15]</sup> **1au**,<sup>[16]</sup> **1az**,<sup>[17]</sup> **1ba**,<sup>[18]</sup> **1bb**,<sup>[19]</sup> **2b**<sup>[20]</sup> were known compounds. The enynone substrates **1e**, **1h**, **1i–1l**, **1n**, **1x**, **1aa–1ai**, **1ak–1am**, **1ao–1au** and **1az–1bb** were synthesized following literatures,<sup>[21]</sup> and the *gem*-dichloroalkane substrates **2b** and **2c** were prepared according to reported procedures.<sup>[20,22]</sup> The structures of the substrates were provided below.

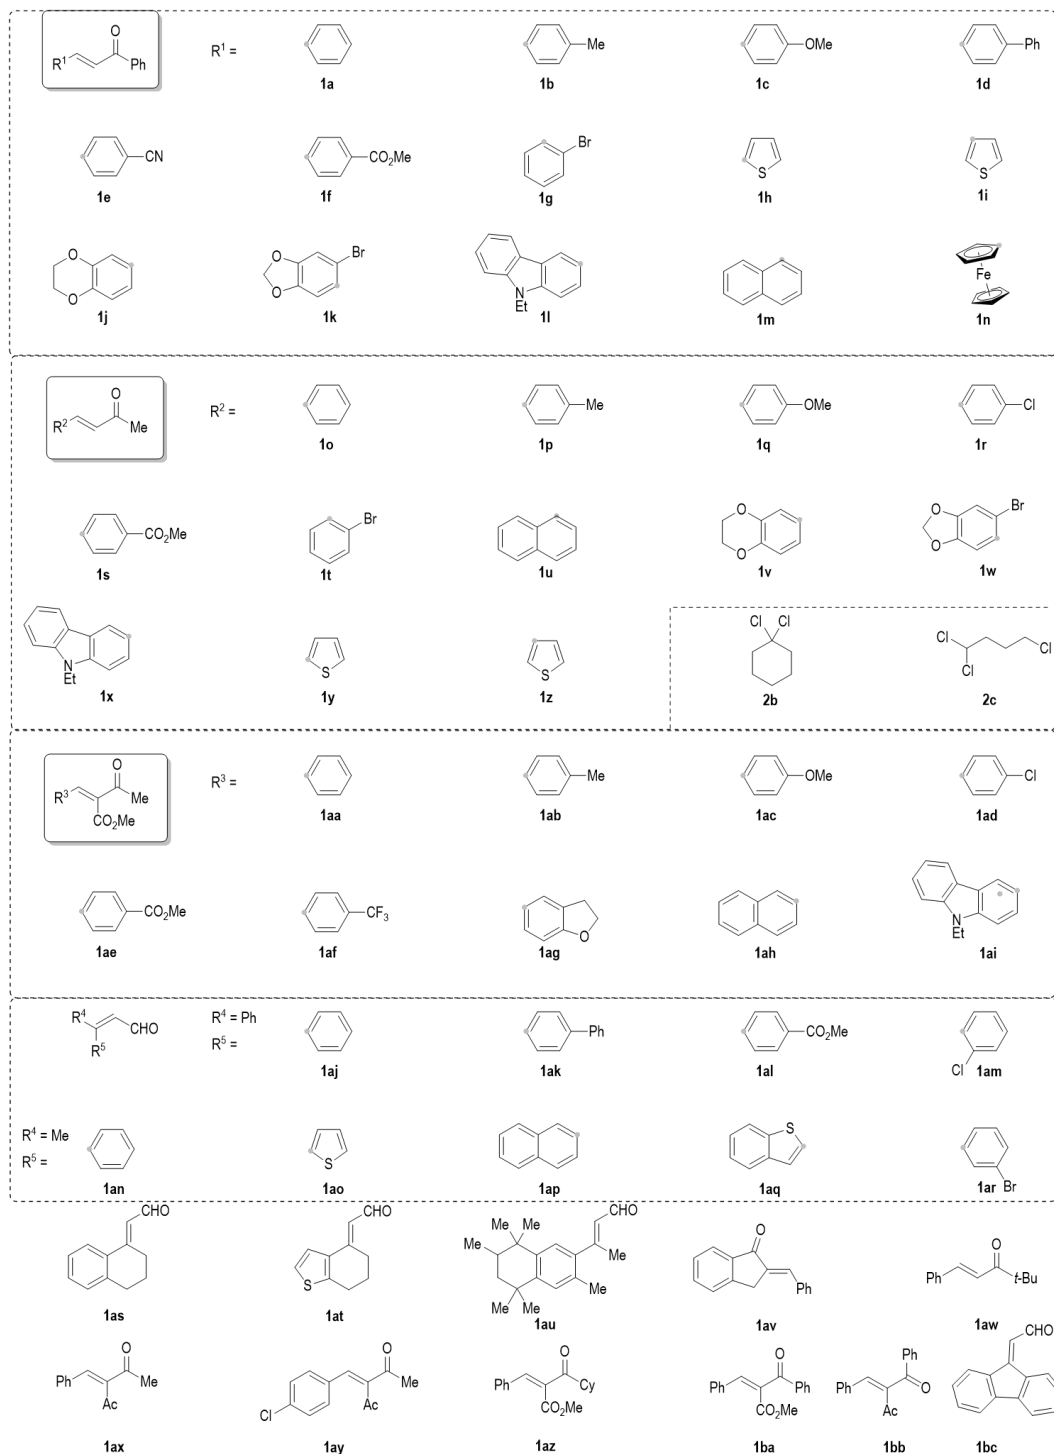

## 2.1 General procedure A: The synthesis of $\alpha,\beta$ -unsaturated ketones

### 1a–1n

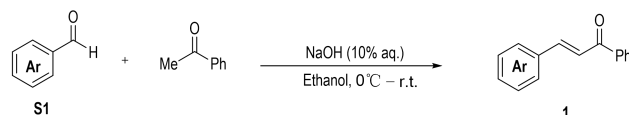

To a stirred solution of substituted acetophenone (2.5 mmol) in ethanol (7.0 mL), an aqueous solution of 10% NaOH (3.0 mL) was added dropwise at 0 °C over a period of 10 min. After the addition is completed, the reaction mixture was stirred at 0 °C for 20 minutes then at room temperature for 1 hours. The resulting mixture was further treated with substituted aldehydes **S1** (2.5 mmol) and allowed to stirred at room temperature, until the conversion was complete (disappearance of acetophenone, monitored by TLC). The solvent was removed by evaporation and the residue was treated with water (10.0 mL) and extracted with ethyl acetate (30.0 mL  $\times$  3). The combined organic layer was dried over anhydrous sodium sulfate, concentrated, and purified through silica-gel column chromatography using ethyl acetate/*n*-hexane as eluent to obtain the product  $\alpha,\beta$ -unsaturated ketones **1**.

## 2.2 General procedure A: The synthesis of $\alpha,\beta$ -unsaturated ketones

### 1o–1z

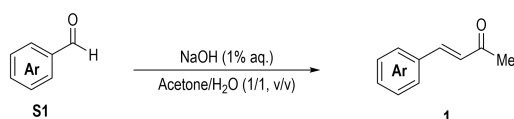

In a flame-dried 50 mL round-bottom flask, aldehyde **S1** (10.0 mmol, 1.0 equiv.) was dispersed in a mixture of acetone/water (1/1, v/v, 6.0 mL). Then, 1% aqueous solution of sodium hydroxide (3.0 mL) was added slowly. The mixture was stirred at room temperature, and the reaction progress was monitored by TLC. Upon completion, the aqueous phase was extracted with DCM. The combined organic layers were dried over anhydrous  $\text{Na}_2\text{SO}_4$ , filtered, and concentrated under reduced pressure. The residue was purified by column chromatography on silica gel to afford the ketones **1**.

## 2.3 General procedure B: The synthesis of $\alpha,\beta$ -unsaturated aldehydes

### 1aj–1am

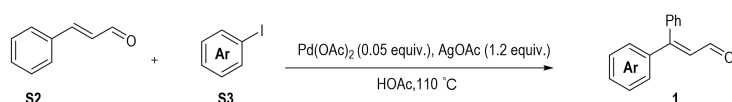

In a flame-dried 50 mL round-bottom flask, aryl iodide (1.0 mmol) and cinnamaldehyde (1.0 mmol) were added to a mixture of silver acetate (0.2 g, 1.2 mmol) and palladium acetate (0.011 g, 5.0 mol %) in acetic acid. The resulting mixture was heated to 110 °C for 3 h under argon. After completion of reaction (monitored by TLC), a saturated solution of  $\text{NaHCO}_3$  was added to the reaction mixture to neutralize the acetic acid. The aqueous solution was extracted with ethyl

acetate (3 × 20.0 mL) and the combined extract was washed with brine and dried over Na<sub>2</sub>SO<sub>4</sub>. The organic layer was concentrated under vacuum and the crude product purified by column chromatography on silica gel (100–200 mesh, Petroleum ether or Petroleum ether : 2–5% Ethyl acetate) to give the pure product  $\alpha,\beta$ -unsaturated aldehydes **1**.

## 2.4 General procedure C: The synthesis of $\alpha,\beta$ -unsaturated aldehydes

### 1an–1ar, 1as–1au, 1bc

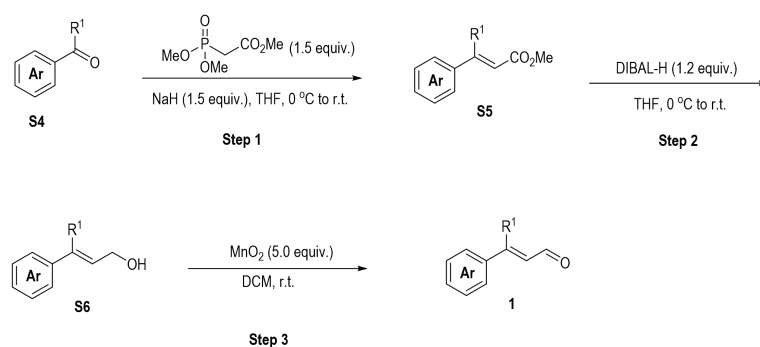

**Step 1:** To a 100 mL round bottom flask containing NaH (20.0 mmol, 60% mineral dispersion) and anhydrous THF (40.0 mL) at 0 °C, was added methyl 2-(dimethoxyphosphoryl)acetate (21.5 mmol) dropwisely via an addition funnel. The reaction mixture was warmed to room temperature, followed by a dropwise addition of a ketone solution (13.0 mmol, in 20.0 mL anhydrous THF). The reaction mixture was stirred for 12 hours, and then poured into a separating funnel containing water. The organic layer was collected, and the aqueous layer was extracted with EtOAc (3 × 40.0 mL). The combined organic layers were dried over Na<sub>2</sub>SO<sub>4</sub>, filtered, and concentrated under reduced pressure. The crude residue was subjected to flash chromatography (hexanes/EtOAc : 95/5 to 90/10) to afford the corresponding  $\alpha,\beta$ -unsaturated esters.

**Step 2:** To a 100 mL round bottom containing the unsaturated ester (20.0 mmol) obtained above and anhydrous THF (40.0 mL), was carefully added DIBAL-H (25.0 mmol) in a few portions at 0 °C. The reaction mixture was gradually warmed to room temperature and stirred for 4 h. The reaction mixture was then cooled to 0 °C and carefully quenched with 1 M aqueous HCl. The organic layer was separated and the aqueous layer was extracted with EtOAc (3 × 40.0 mL). The combined organics were dried over Na<sub>2</sub>SO<sub>4</sub>, filtered, and concentrated under reduced pressure. The crude residue was subjected to flash chromatography (hexanes/EtOAc : 80/20 to 50/50) to afford the corresponding allylic alcohols.

**Step 3:** To a 100 mL round bottom flask containing the allylic alcohol (10.0 mmol) obtained above, was added activated MnO<sub>2</sub> (50.0 mmol) and anhydrous DCM (20.0 mL) at room temperature. After complete consumption of the starting material (as indicated by TLC analysis), the reaction mixture was filtered through a pad of celite. The resulting filtrate was concentrated under reduced pressure. The crude residue was subjected to flash chromatography (hexanes/EtOAc : 95/5 to 90/10) to afford the corresponding  $\beta,\beta$ -disubstituted enals.

## 2.5 General procedure D: The synthesis of enones 1aa–1ai, 1av–1bb

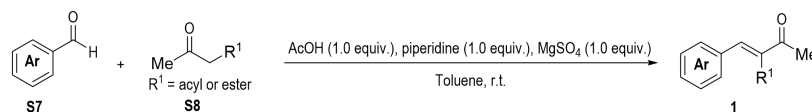

In a flame-dried 50 mL round-bottom flask, aldehyde **S7** (5.0 mmol, 1.0 equiv.), ketone **S8** (5.0 mmol, 1.0 equiv.) and anhydrous MgSO<sub>4</sub> (5.0 mmol, 1.0 equiv.) were dispersed in dry toluene (10.0 mL). Then, AcOH (3.0 mmol, 0.6 equiv.) and piperidine (0.5 mmol, 0.1 equiv.) were added slowly. The mixture was stirred at room temperature, and the reaction progress was monitored by TLC. Upon completion, the reaction mixture was filtered through a Celite pad and concentrated under reduced pressure. The residue was purified by column chromatography on silica gel to afford the enones **1**.

## 2.6 General procedure E: The synthesis of *gem*-dichloroalkane **2b**<sup>[20]</sup>

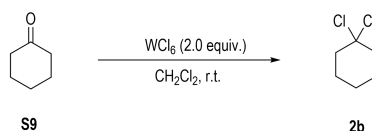

In a flame-dried 50 mL round-bottom flask, Cyclohexanone **S9** (12.0 mmol, 1.0 equiv.) was dispersed in dry CH<sub>2</sub>Cl<sub>2</sub> (30.0 mL). Then, WCl<sub>6</sub> (24.0 mmol, 2.0 equiv.) was added slowly. The mixture was stirred at room temperature. After 18 hours, Et<sub>2</sub>O and CH<sub>2</sub>Cl<sub>2</sub> were added, and the NaOH (1.0 M) added dropwise to quench this reaction. The solution was vacuum filtered through a silica pad, dried over MgSO<sub>4</sub>, filtered, and concentrated under reduced pressure. The crude product was purified by column chromatography to afford **2b** in 40% yield.

## 2.7 General procedure F: The synthesis of *gem*-dichloroalkane **2c**<sup>[22]</sup>

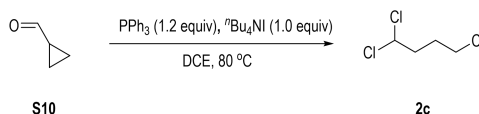

Into a sealed tube were added aldehyde **S10** (1.0 equiv., 10.0 mmol, 91.1 mg), triphenylphosphine (1.2 equiv, 12.0 mmol, 157.4 mg), tetrabutylammonium iodide (1.0 equiv, 10.0 mmol, 184.7 mg) and anhydrous 1,2-dichloroethane (20.0 ml) under a N<sub>2</sub> atmosphere. The reaction mixture was stirred at 80 °C for 10 h. After the mixture was cooled to room temperature, the solvent was removed by concentration under reduced pressure. The residue was subjected to flash column chromatography with the use of PE (petroleum ether) : EA (ethyl acetate) = 100 : 1 as the eluent to afford the pure product **2c** in 70% yield.

### 3. Conditions Screening for the Synthesis of **3a** and **4a**

**Table S1.** Conditions Screening for the Synthesis of **3a** and **4a**.<sup>[a]</sup>

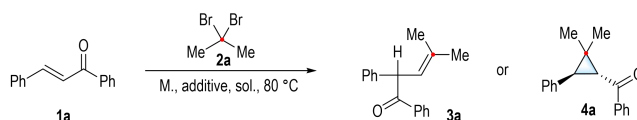

| Entry | M  | Solvent                              | Additive | Yield <sup>[b]</sup> <b>3a/4a</b> (%) |
|-------|----|--------------------------------------|----------|---------------------------------------|
| 1     | Zn | PhMe                                 | None     | N.D.                                  |
| 2     | Mn | PhMe                                 | None     | N.D.                                  |
| 3     | In | PhMe                                 | None     | N.D.                                  |
| 4     | Fe | PhMe                                 | None     | 12/<5                                 |
| 5     | Fe | PhMe                                 | LiCl     | 67/20                                 |
| 6     | Fe | ACN                                  | LiCl     | 46/28                                 |
| 7     | Fe | THF                                  | LiCl     | 61/20                                 |
| 8     | Fe | DME                                  | LiCl     | 75/22                                 |
| 9     | Fe | H <sub>2</sub> O                     | LiCl     | 0/43                                  |
| 10    | Fe | ACN/H <sub>2</sub> O <sup>[c]</sup>  | LiCl     | 0/36                                  |
| 11    | Fe | EtOH/H <sub>2</sub> O <sup>[c]</sup> | LiCl     | 0/74                                  |

[a] All reactions were conducted using **1a** (0.2 mmol, 1.0 equiv.), **2a** (0.6 mmol, 3.0 equiv.), additive (0.6 mmol, 3.0 equiv.) and Metal (0.6 mmol, 3.0 equiv.) in solvent (2.0 mL). [b] Isolated yield. [c] ration is 10:1 . N.D. is Not Detected.

## 4. The Synthesis of 3

### 4.1 General procedure G: The synthesis of $\beta,\gamma$ -unsaturated ketones or aldehydes 3

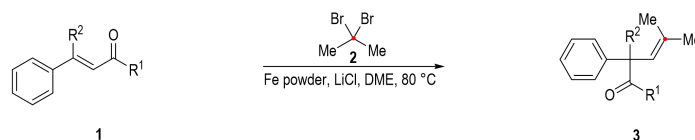

In a flame-dried Schlenk tube, the  $\alpha,\beta$ -unsaturated ketone or aldehyde **1** (0.2 mmol, 1.0 equiv.), 2,2-dibromopropane (0.6 mmol, 3.0 equiv.), LiCl (0.6 mmol, 3.0 equiv.), and iron powder (0.6 mmol, 3.0 equiv.) were dispersed in dry DME (2.0 mL) under an argon atmosphere. The mixture was stirred at 80 °C in oil bath, and the reaction progress was monitored by TLC. After 12.0 h, the reaction mixture was concentrated under reduced pressure, and the crude residue was directly purified by column chromatography on silica gel to afford the  $\beta,\gamma$ -unsaturated ketones **3**.

### 4.2 General procedure H: The synthesis of dihydrofurans 3'

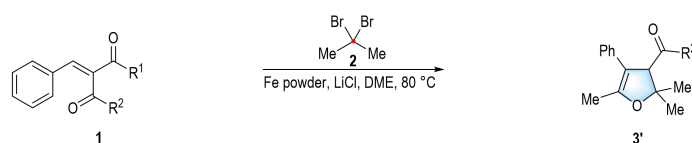

In a flame-dried Schlenk tube, the  $\alpha,\beta$ -unsaturated ketone **1** (0.2 mmol, 1.0 equiv.), 2,2-dibromopropane (0.6 mmol, 3.0 equiv.), LiCl (0.6 mmol, 3.0 equiv.), and iron powder (0.6 mmol, 3.0 equiv.) were dispersed in dry DME (2.0 mL) under an argon atmosphere. The mixture was stirred at 80 °C in oil bath, and the reaction progress was monitored by TLC. After 12.0 h, the reaction mixture was concentrated under reduced pressure, and the crude residue was directly purified by column chromatography on silica gel to afford the dihydrofurans **3'**.

### 4.3 General procedure I: The synthesis of cyclopropanes 4

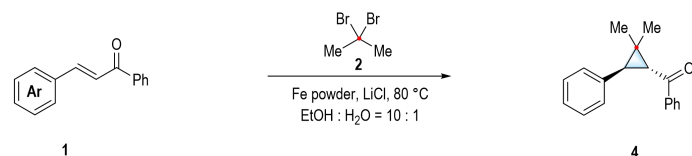

In a flame-dried Schlenk tube, the  $\alpha,\beta$ -unsaturated ketone **1** (0.2 mmol, 1.0 equiv.), 2,2-dibromopropane (0.6 mmol, 3.0 equiv.), LiCl (0.6 mmol, 3.0 equiv.), and iron powder (0.6 mmol, 3.0 equiv.) were dispersed in EtOH (2.0 mL) and H<sub>2</sub>O (0.2 mL) under an argon atmosphere. The mixture was stirred at 80 °C in oil bath, and the reaction progress was monitored by TLC. After 12.0 h, the reaction mixture was concentrated under reduced pressure, and the crude residue was directly purified by column chromatography on silica gel to afford the cyclopropanes **4**.

## 5. The Gram-scale Reactions

### 5.1 The gram-scale synthesis of **3b**

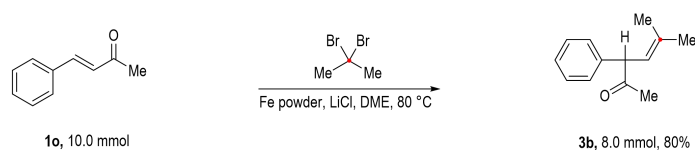

According to General Procedure G, the gram-scale synthesis of **3b** was carried out using enone **1o** (10.0 mmol, 1.0 equiv.) and 2,2-dibromopropane (30.0 mmol, 3.0 equiv.) as starting materials. The reaction operation followed General Procedure G, and product **3b** was purified by column chromatography on silica gel (PE/EA = 50 : 1), affording **3b** in a yield of 80%.

### 5.2 The gram-scale synthesis of **3a'**

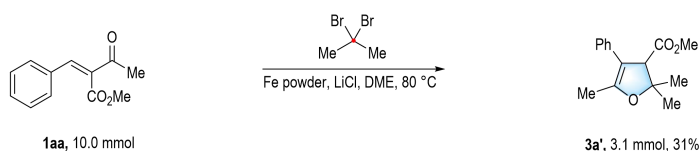

According to General Procedure H, the gram-scale synthesis of **3a'** was carried out using enone **1aa** (10.0 mmol, 1.0 equiv.) and 2,2-dibromopropane (30.0 mmol, 3.0 equiv.) as starting materials. The reaction operation followed General Procedure H, and product **3a'** was purified by column chromatography on silica gel (PE/EA = 30 : 1), affording **3a'** in a yield of 31%.

### 5.3 The gram-scale synthesis of **4a**

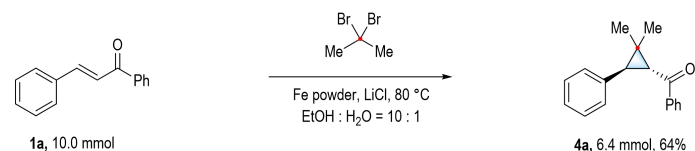

According to General Procedure I, the gram-scale synthesis of **4a** was carried out using enone **1a** (10.0 mmol, 1.0 equiv.) and 2,2-dibromopropane (30.0 mmol, 3.0 equiv.) as starting materials. The reaction operation followed General Procedure I, and product **4a** was purified by column chromatography on silica gel (PE/EA = 50 : 1), affording **4a** in a yield of 64%.

## 6. The Synthetic Transformation of 3b

### 6.1 The synthesis of 3b-1

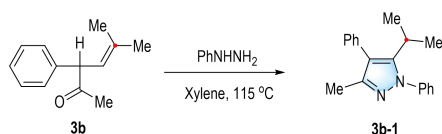

In a flame-dried Schlenk tube, ketone **3b** (0.1 mmol, 1.0 equiv.), PhNHNH<sub>2</sub> (0.1 mmol, 1.0 equiv.) were dispersed in Xylene (3.0 mL). After stirring for 2 hours at 115 °C, the residue was directly purified by column chromatography on silica gel to afford compound **3b-1** in 52% yield.<sup>[23]</sup>

### 6.2 The synthesis of 3b-2

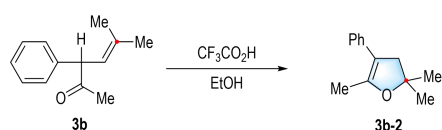

In a flame-dried Schlenk tube, ketone **3b** (0.1 mmol, 1.0 equiv.), CF<sub>3</sub>COOH (0.3 mmol, 1.0 equiv.) were dispersed in EtOH (3.0 mL). After stirring for 2 hours at room temperature, the solvent was removed under reduced pressure. The residue was dissolved in DCM and was washed with water. The combined organic layers were dried over anhydrous Na<sub>2</sub>SO<sub>4</sub>, filtered, and concentrated under reduced pressure. The residue was purified by column chromatography on silica gel to afford compound **3b-2** in 82% yield.<sup>[24]</sup>

## 7. The Synthetic Transformation of 3w-1

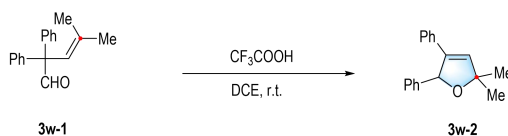

In a flame-dried Schlenk tube, aldehyde **3w-1** (0.1 mmol, 1.0 equiv.), CF<sub>3</sub>COOH (0.1 mmol, 1.0 equiv.) were dispersed in DCE (3.0 mL). After stirring for 2 hours at room temperature, the solvent was removed under reduced pressure. The residue was dissolved in DCM and was washed with water. The combined organic layers were dried over anhydrous Na<sub>2</sub>SO<sub>4</sub>, filtered, and concentrated under reduced pressure. The residue was purified by column chromatography on silica gel to afford compound **3w-2** in 67% yield.<sup>[24]</sup>

## 8. The Synthetic Transformation of 3o

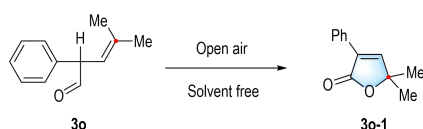

In a flame-dried Schlenk tube, aldehyde **3o** (0.1 mmol, 1.0 equiv.) was heated without solvent

under air condition. After stirring for 2 hours at 80 °C, the residue was dissolved in DCM and was washed with water. The combined organic layers were dried over anhydrous Na<sub>2</sub>SO<sub>4</sub>, filtered, and concentrated under reduced pressure. The residue was purified by column chromatography on silica gel to afford compound **3o-1** in 66% yield.<sup>[25]</sup>

## 9. Control Experiments

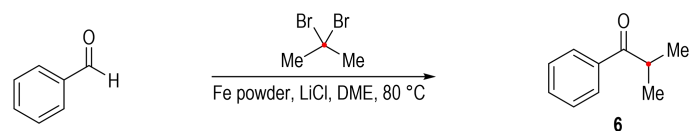

In a flame-dried Schlenk tube, the benzaldehyde (0.2 mmol, 1.0 equiv.), 2,2-dibromopropane (0.6 mmol, 3.0 equiv.), LiCl (0.6 mmol, 3.0 equiv.), and iron powder (0.6 mmol, 3.0 equiv.) were dispersed in dry DME (2.0 mL) under an argon atmosphere. The mixture was stirred at 80 °C in oil bath, and the reaction progress was monitored by TLC. After cooling to room temperature, the reaction mixture was concentrated under reduced pressure. The residue was purified by column chromatography on silica gel to afford the product **6** in 77% yield.

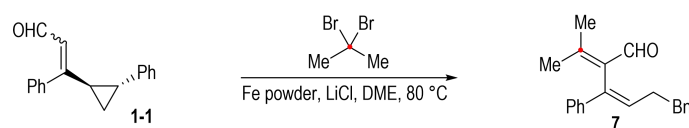

In a flame-dried Schlenk tube, the enal **1-1** (0.2 mmol, 1.0 equiv.), 2,2-dibromopropane (0.6 mmol, 3.0 equiv.), LiCl (0.6 mmol, 3.0 equiv.), and iron powder (0.6 mmol, 3.0 equiv.) were dispersed in dry DME (2.0 mL) under an argon atmosphere. The mixture was stirred at 80 °C in oil bath, and the reaction progress was monitored by TLC. After cooling to room temperature, the reaction mixture was concentrated under reduced pressure. The residue was purified by column chromatography on silica gel to afford the product **7** in 52% yield.

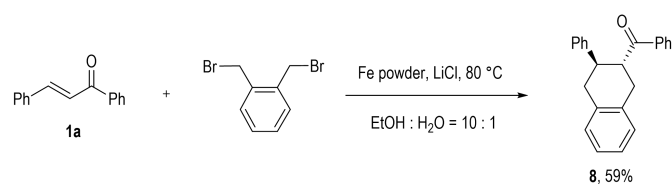

In a flame-dried Schlenk tube, the  $\alpha,\beta$ -unsaturated ketone **1a** (0.2 mmol, 1.0 equiv.), 1,2-bis(bromomethyl)benzene (0.6 mmol, 3.0 equiv.), LiCl (0.6 mmol, 3.0 equiv.), and iron powder (0.6 mmol, 3.0 equiv.) were dispersed in EtOH (2.0 mL) and H<sub>2</sub>O (0.2 mL) under an argon atmosphere. The mixture was stirred at 80 °C in oil bath, and the reaction progress was monitored by TLC. After 12.0 h, the reaction mixture was concentrated under reduced pressure, and the crude residue was directly purified by column chromatography on silica gel to afford the dihydronaphthalene derivative **8** in the yield of 59%.

## 10. Characterization Data

### 10.1 Characterization data for $\alpha,\beta$ -unsaturated ketones 1

4-(6-bromobenzo[d][1,3]dioxol-5-yl)but-3-en-2-one (**1w**)

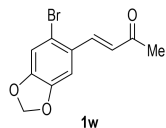

Compound **1w** was synthesized through general procedure A and purified by column chromatography on silica gel (PE/EA = 80 : 1), as a yellow oil (2.14 g, 80%).  $^1\text{H NMR}$  (400 MHz, Chloroform-*d*)  $\delta$  6.97 (s, 1H), 6.90 (s, 1H), 6.84 (d,  $J = 12.4$  Hz, 1H), 6.13 (d,  $J = 12.4$  Hz, 1H), 5.93 (s, 2H), 2.07 (s, 3H);  $^{13}\text{C NMR}$  (101 MHz, Chloroform-*d*)  $\delta$  198.8, 148.0, 146.1, 138.5, 128.4, 127.8, 114.0, 111.5, 109.6, 101.0, 29.9.

3-((2,3-dihydrobenzofuran-5-yl)methylene)pentane-2,4-dione (**1ag**)

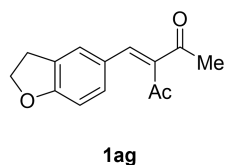

Compound **1ag** was synthesized through general procedure D and purified by column chromatography on silica gel (PE/EA = 20 : 1), as a yellow oil (1.40 g, 61%).  $^1\text{H NMR}$  (400 MHz, Chloroform-*d*)  $\delta$  7.41 (s, 1H), 7.20 (dd,  $J = 8.4, 1.6$  Hz, 1H), 6.79 (d,  $J = 8.4$  Hz, 1H), 4.64 (t,  $J = 8.8$  Hz, 2H), 3.22 (t,  $J = 8.8$  Hz, 2H), 2.40 (s, 3H), 2.33 (s, 3H);  $^{13}\text{C NMR}$  (101 MHz, Chloroform-*d*)  $\delta$  206.6, 196.5, 162.7, 140.3, 140.1, 131.9, 128.5, 126.5, 125.4, 110.0, 72.1, 31.7, 29.2, 26.4.

methyl 2-((9-ethyl-9H-carbazol-3-yl)methylene)-3-oxobutanoate (**1ai**)

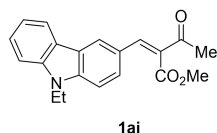

Compound **1ai** was synthesized through general procedure D and purified by column chromatography on silica gel (PE/EA = 20 : 1), as a yellow oil (1.28 g, 40%).  $^1\text{H NMR}$  (400 MHz, Chloroform-*d*)  $\delta$  8.19 (d,  $J = 1.6$  Hz, 1H), 8.06 (d,  $J = 7.6$  Hz, 1H), 7.79 (s, 1H), 7.58 – 7.46 (m, 2H), 7.39 (dd,  $J = 17.0, 8.4$  Hz, 2H), 7.32 – 7.24 (m, 1H), 4.34 (q,  $J = 7.2$  Hz, 2H), 3.93 (s, 3H), 2.45 (s, 3H), 1.43 (t,  $J = 7.3$  Hz, 3H);  $^{13}\text{C NMR}$  (101 MHz, Chloroform-*d*)  $\delta$  194.9, 176.8, 143.4, 141.4, 140.5, 131.2, 127.6, 126.5, 123.4, 123.3, 123.0, 122.7, 120.4, 119.9, 109.0, 108.9, 52.5, 37.7, 26.3, 13.7.

### 10.2 Characterization data for *gem*-dichloroalkane 2

1,1,4-trichlorobutane (**2c**)<sup>[22]</sup>

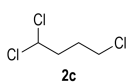

Compound **2c** was synthesized through general procedure F and purified by column chromatography on silica gel (PE/EA = 100 : 1), as a pale oil (1.12 g, 70%).  $^1\text{H NMR}$  (400 MHz, Chloroform-*d*)  $\delta$  5.83 (t,  $J = 6.0$  Hz, 1H), 3.61 (t,  $J = 6.4$  Hz, 2H), 2.45 – 2.32 (m, 2H), 2.15 – 2.00 (m, 2H);  $^{13}\text{C NMR}$  (101 MHz, Chloroform-*d*)  $\delta$  72.6, 43.6, 40.7, 28.6.

### 10.3 Characterization data for $\beta,\gamma$ -unsaturated ketones 3

4-methyl-1,2-diphenylpent-3-en-1-one (**3a**)<sup>[26]</sup>

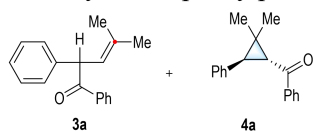

The mixture of **3a** and **4a**<sup>[27]</sup> were afforded through general

procedure G and purified by column chromatography on silica gel (PE/EA = 50 : 1), as a yellow oil (**3a** : **4a** = 3:1, 48.5 mg). the yield of **3a** was 75% <sup>1</sup>H NMR (400 MHz, Chloroform-*d*) δ 8.03 – 7.94 (m, 2H), 7.50 (t, *J* = 7.2 Hz, 1H), 7.41 (t, *J* = 7.6 Hz, 2H), 7.31 (s, 2H), 7.26 (d, *J* = 7.6 Hz, 1H), 7.21 (q, *J* = 6.0 Hz, 2H), 5.75 (d, *J* = 9.2 Hz, 1H), 5.48 (d, *J* = 9.2 Hz, 1H), 1.76 (s, 3H), 1.75 (s, 3H).

#### 5-methyl-3-phenylhex-4-en-2-one (**3b**)<sup>[28]</sup>

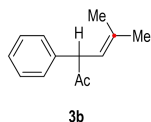

Compound **3b** was synthesized through general procedure G and purified by column chromatography on silica gel (PE/EA = 50 : 1), as a yellow oil (35.9 mg, 95%). <sup>1</sup>H NMR (400 MHz, Chloroform-*d*) δ 7.28 – 7.23 (m, 2H), 7.17 (t, *J* = 5.6 Hz, 3H), 5.56 (d, *J* = 9.2 Hz, 1H), 4.46 (d, *J* = 9.2 Hz, 1H), 2.03 (s, 3H), 1.71 (s, 3H), 1.60 (s, 3H); <sup>13</sup>C NMR (101 MHz, Chloroform-*d*) δ 206.2, 138.2, 134.5, 127.8, 127.0, 126.0, 120.5, 57.8, 27.3, 25.0, 17.2.

#### 3-(4-methoxyphenyl)-5-methylhex-4-en-2-one (**3c**)

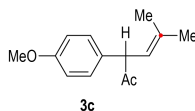

Compound **3c** was synthesized through general procedure G and purified by column chromatography on silica gel (PE/EA = 20 : 1), as a yellow oil (36.7 mg, 85%). <sup>1</sup>H NMR (400 MHz, Chloroform-*d*) δ 7.08 (d, *J* = 8.4 Hz, 2H), 6.79 (d, *J* = 8.4 Hz, 2H), 5.53 (d, *J* = 9.2 Hz, 1H), 4.40 (d, *J* = 9.2 Hz, 1H), 3.72 (s, 3H), 2.02 (s, 3H), 1.70 (s, 3H), 1.60 (s, 3H); <sup>13</sup>C NMR (101 MHz, Chloroform-*d*) δ 207.5, 158.6, 135.2, 131.4, 129.0, 121.7, 114.3, 57.9, 55.2, 28.1, 26.0, 18.2; IR (cm<sup>-1</sup>): ν 3033, 2926, 1718, 1645, 1604, 1379, 1250, 1116, 1034, 801; HRMS (ESI) *m/z* calculated for C<sub>14</sub>H<sub>17</sub>O<sub>2</sub> [M + H]<sup>+</sup>: 217.1229, found: 217.1229.

#### 3-(4-chlorophenyl)-5-methylhex-4-en-2-one (**3d**)

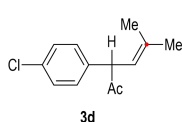

Compound **3d** was synthesized through general procedure G and purified by column chromatography on silica gel (PE/EA = 50 : 1), as a yellow oil (25.8 mg, 58%). <sup>1</sup>H NMR (400 MHz, Chloroform-*d*) δ 7.33 – 7.25 (m, 2H), 7.23 – 7.14 (m, 2H), 5.57 (dt, *J* = 9.2, 1.4 Hz, 1H), 4.52 (d, *J* = 9.2 Hz, 1H), 2.11 (s, 3H), 1.81 – 1.74 (m, 3H), 1.67 (d, *J* = 1.2 Hz, 3H); <sup>13</sup>C NMR (101 MHz, Chloroform-*d*) δ 206.6, 137.7, 136.1, 132.9, 129.4, 128.9, 121.1, 58.0, 28.4, 26.0, 18.3; IR (cm<sup>-1</sup>): ν 3058, 2922, 1717, 1660, 1592, 1366, 1055, 751; HRMS (ESI) *m/z* calculated for C<sub>13</sub>H<sub>16</sub>OCl [M + H]<sup>+</sup>: 223.0890, found: 223.0888.

#### methyl 4-(5-methyl-2-oxohex-4-en-3-yl)benzoate (**3e**)

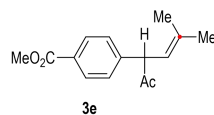

Compound **3e** was synthesized through general procedure G and purified by column chromatography on silica gel (PE/EA = 20 : 1), as a yellow oil (40.3 mg, 91%). <sup>1</sup>H NMR (400 MHz, Chloroform-*d*) δ 7.93 (d, *J* = 8.0 Hz, 2H), 7.24 (d, *J* = 8.0 Hz, 2H), 5.54 (d, *J* = 9.2 Hz, 1H), 4.52 (d, *J* = 9.2 Hz, 1H), 3.83 (s, 3H), 2.04 (s, 3H), 1.72 (s, 3H), 1.61 (s, 3H); <sup>13</sup>C NMR (101 MHz, Chloroform-*d*) δ 206.2, 166.8, 144.3, 136.4, 130.1, 129.0, 128.1, 120.8, 58.8, 52.1, 28.4, 26.0, 18.3; IR (cm<sup>-1</sup>): ν 3016, 2927, 1735, 1716, 1638, 1560, 1445, 1153, 849, 740, 645; HRMS (ESI) *m/z* calculated for C<sub>15</sub>H<sub>19</sub>O<sub>3</sub>Na [M + H]<sup>+</sup>: 247.1334, found: 247.1322.

### 3-(2-bromophenyl)-5-methylhex-4-en-2-one (**3f**)

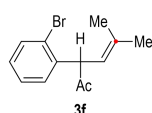

Compound **3f** was synthesized through general procedure G and purified by column chromatography on silica gel (PE/EA = 50 : 1), as a yellow oil (43.6 mg, 82%). **<sup>1</sup>H NMR (400 MHz, Chloroform-*d*)**  $\delta$  7.49 (d,  $J$  = 8.0 Hz, 1H), 7.20 (q,  $J$  = 7.6 Hz, 2H), 7.03 (t,  $J$  = 7.2 Hz, 1H), 5.47 (d,  $J$  = 9.2 Hz, 1H), 4.97 (d,  $J$  = 9.2 Hz, 1H), 2.10 (s, 3H), 1.72 (s, 3H), 1.64 (s, 3H); **<sup>13</sup>C NMR (101 MHz, Chloroform-*d*)**  $\delta$  206.4, 139.2, 136.8, 133.0, 130.0, 128.5, 127.8, 124.6, 120.9, 57.4, 29.1, 25.9, 18.7; **IR (cm<sup>-1</sup>)**:  $\nu$  3001, 2923, 1713, 1648, 1591, 1560, 1491, 1229, 1094, 1014, 755; **HRMS (ESI)**  $m/z$  calculated for C<sub>13</sub>H<sub>16</sub>OBr [M + H]<sup>+</sup>: 267.0385, found: 267.0381.

### 5-methyl-3-(naphthalen-1-yl)hex-4-en-2-one (**3g**)

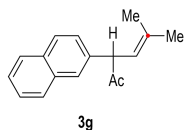

Compound **3g** was synthesized through general procedure G and purified by column chromatography on silica gel (PE/EA = 50 : 1), as a yellow oil (36.3 mg, 77%). **<sup>1</sup>H NMR (400 MHz, Chloroform-*d*)**  $\delta$  7.81 (dd,  $J$  = 7.4, 2.0 Hz, 3H), 7.70 (s, 1H), 7.50 – 7.42 (m, 2H), 7.34 (d,  $J$  = 2.0 Hz, 1H), 5.74 (ddt,  $J$  = 9.2, 2.8, 1.2 Hz, 1H), 4.70 (d,  $J$  = 9.2 Hz, 1H), 2.13 (s, 3H), 1.81 (d,  $J$  = 1.2 Hz, 3H), 1.71 (d,  $J$  = 1.2 Hz, 3H); **<sup>13</sup>C NMR (101 MHz, Chloroform-*d*)**  $\delta$  207.3, 135.8, 128.6, 127.75, 127.7, 126.7, 126.2, 126.2, 125.9, 121.3, 58.9, 28.4, 26.0; **IR (cm<sup>-1</sup>)**:  $\nu$  3056, 2925, 1718, 1641, 1585, 1356, 1255, 817, 746, 478; **HRMS (ESI)**  $m/z$  calculated for C<sub>17</sub>H<sub>17</sub>O [M + H]<sup>+</sup>: 237.1279, found: 237.1284.

### 3-(2,3-dihydrobenzo[*b*][1,4]dioxin-6-yl)-5-methylhex-4-en-2-one (**3h**)

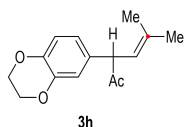

Compound **3h** was synthesized through general procedure G and purified by column chromatography on silica gel (PE/EA = 50 : 1), as a yellow oil (47.2 mg, 96%). **<sup>1</sup>H NMR (400 MHz, Chloroform-*d*)**  $\delta$  6.81 (d,  $J$  = 8.2 Hz, 1H), 6.75 (d,  $J$  = 2.0 Hz, 1H), 6.69 (dd,  $J$  = 8.3, 2.0 Hz, 1H), 5.61 – 5.53 (m, 1H), 4.41 (d,  $J$  = 9.2 Hz, 1H), 4.23 (s, 4H), 2.09 (s, 3H), 1.77 (s, 3H), 1.66 (d,  $J$  = 1.2 Hz, 3H); **<sup>13</sup>C NMR (101 MHz, Chloroform-*d*)**  $\delta$  207.4, 143.7, 142.6, 135.4, 132.4, 121.5, 121.0, 117.6, 116.8, 64.3, 58.0, 28.2, 26.0, 18.2; **IR (cm<sup>-1</sup>)**:  $\nu$  3075, 2928, 1714, 1651, 1588, 1458, 1377, 1258, 1068, 920, 888; **HRMS (ESI)**  $m/z$  calculated for C<sub>15</sub>H<sub>18</sub>O<sub>3</sub>Na [M + Na]<sup>+</sup>: 269.1154, found: 269.1156.

### 3-(6-bromobenzo[*d*][1,3]dioxol-5-yl)-5-methylhex-4-en-2-one (**3i**)

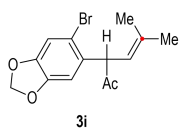

Compound **3i** was synthesized through general procedure G and purified by column chromatography on silica gel (PE/EA = 40 : 1), as a yellow oil (49.6 mg, 80%). **<sup>1</sup>H NMR (400 MHz, Chloroform-*d*)**  $\delta$  7.00 (s, 1H), 6.73 (s, 1H), 5.95 (s, 2H), 5.48 (d,  $J$  = 9.2 Hz, 1H), 4.96 (d,  $J$  = 9.2 Hz, 1H), 2.17 (s, 3H), 1.78 (s, 3H), 1.70 (s, 3H); **<sup>13</sup>C NMR (101 MHz, Chloroform-*d*)**  $\delta$  205.8, 146.7, 146.3, 136.0, 131.4, 119.8, 113.6, 111.6, 108.4, 100.8, 55.9, 28.1, 24.9, 17.7; **IR (cm<sup>-1</sup>)**:  $\nu$  3017, 2914, 1717, 1641, 1504, 1477, 1384, 1233, 1157, 1038, 933, 816, 817; **HRMS (ESI)**  $m/z$  calculated for C<sub>14</sub>H<sub>16</sub>O<sub>3</sub>Br [M + H]<sup>+</sup>: 311.0283, found: 311.0284.

### 3-(9-ethyl-9H-carbazol-3-yl)-5-methylhex-4-en-2-one (**3j**)

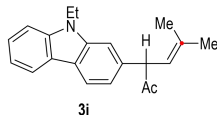

Compound **3j** was synthesized through general procedure G and purified by column chromatography on silica gel (PE/EA = 20 : 1), as a yellow oil (48.8 mg, 80%). **<sup>1</sup>H NMR (400 MHz, Chloroform-*d*)**  $\delta$  8.01 (d,  $J$  = 7.7 Hz, 1H),

7.88 (s, 1H), 7.42 – 7.35 (m, 1H), 7.33 – 7.22 (m, 3H), 7.14 (t,  $J = 7.2$  Hz, 1H), 5.77 – 5.69 (m, 1H), 4.63 (d,  $J = 9.2$  Hz, 1H), 4.25 (q,  $J = 7.2$  Hz, 2H), 2.05 (s, 3H), 1.73 (s, 3H), 1.67 – 1.61 (m, 3H), 1.33 (t,  $J = 7.2$  Hz, 3H);  $^{13}\text{C}$  NMR (101 MHz, Chloroform-*d*)  $\delta$  208.1, 140.3, 139.1, 134.9, 129.8, 125.8, 125.7, 123.4, 122.7, 122.3, 120.5, 119.8, 118.9, 108.9, 108.5, 58.8, 37.6, 28.3, 26.1, 18.4, 13.9; IR ( $\text{cm}^{-1}$ ):  $\nu$  3049, 2928, 1712, 1645, 1600, 1465, 1378, 1331, 1233, 1153, 748, 631; HRMS (ESI)  $m/z$  calculated for  $\text{C}_{21}\text{H}_{23}\text{NONa}$  [ $\text{M} + \text{Na}$ ] $^{+}$ : 328.1677, found: 328.1678.

#### 5-methyl-3-(thiophen-2-yl)hex-4-en-2-one (3k)

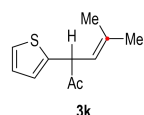

Compound **3k** was synthesized through general procedure G and purified by column chromatography on silica gel (PE/EA = 50 : 1), as a yellow oil (30.6 mg, 79%).  $^1\text{H}$  NMR (400 MHz, Chloroform-*d*)  $\delta$  7.21 (d,  $J = 5.2$  Hz, 1H), 7.02 – 6.94 (m, 1H), 6.89 (s, 1H), 5.55 (d,  $J = 8.8$  Hz, 1H), 4.76 (d,  $J = 9.2$  Hz, 1H), 2.15 (s, 3H), 1.80 (s, 3H), 1.72 (s, 3H);  $^{13}\text{C}$  NMR (101 MHz, Chloroform-*d*)  $\delta$  204.7, 140.6, 135.8, 126.0, 123.9, 123.6, 120.1, 52.9, 26.4, 24.9, 17.2; IR ( $\text{cm}^{-1}$ ):  $\nu$  3086, 2924, 1718, 1647, 1601, 1570, 1365, 1257, 1158, 1039, 807, 698; HRMS (ESI)  $m/z$  calculated for  $\text{C}_{11}\text{H}_{15}\text{O}_3\text{OS}$  [ $\text{M} + \text{H}$ ] $^{+}$ : 195.0844, found: 195.0835.

#### 5-methyl-3-(thiophen-3-yl)hex-4-en-2-one (3l)

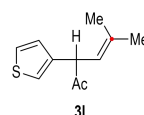

Compound **3l** was synthesized through general procedure G and purified by column chromatography on silica gel (PE/EA = 50 : 1), as a yellow oil (29.5 mg, 76%).  $^1\text{H}$  NMR (400 MHz, Chloroform-*d*)  $\delta$  7.25 – 7.19 (m, 1H), 7.03 (s, 1H), 6.89 (d,  $J = 4.7$  Hz, 1H), 5.48 (d,  $J = 9.2$  Hz, 1H), 4.54 (d,  $J = 9.2$  Hz, 1H), 2.03 (s, 3H), 1.72 (s, 3H), 1.63 (s, 3H);  $^{13}\text{C}$  NMR (101 MHz, Chloroform-*d*)  $\delta$  206.7, 139.2, 136.0, 127.2, 126.0, 121.6, 121.0, 54.5, 27.8, 25.9, 18.2; IR ( $\text{cm}^{-1}$ ):  $\nu$  3036, 2931, 1717, 1647, 1597, 1374, 1231, 1019, 949, 770, 634; HRMS (ESI)  $m/z$  calculated for  $\text{C}_{11}\text{H}_{15}\text{O}_3\text{OS}$  [ $\text{M} + \text{H}$ ] $^{+}$ : 195.0844, found: 195.0835.

#### 4-cyclohexylidene-3-phenylbutan-2-one (3m)

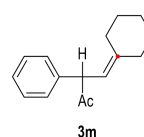

Compound **3m** was synthesized through general procedure G and purified by column chromatography on silica gel (PE/EA = 60 : 1), as a yellow oil (36.2 mg, 80%).  $^1\text{H}$  NMR (400 MHz, Chloroform-*d*)  $\delta$  7.28 – 7.22 (m, 2H), 7.16 (dd,  $J = 6.8, 5.2$  Hz, 3H), 5.49 (d,  $J = 9.2$  Hz, 1H), 4.54 (d,  $J = 9.2$  Hz, 1H), 2.11 (dd,  $J = 12.2, 5.0$  Hz, 4H), 2.03 (s, 3H), 1.49 – 1.34 (m, 6H);  $^{13}\text{C}$  NMR (101 MHz, Chloroform-*d*)  $\delta$  207.4, 143.5, 139.5, 128.8, 128.1, 127.0, 118.1, 57.8, 37.3, 29.4, 28.4, 28.2, 27.5, 26.7; IR ( $\text{cm}^{-1}$ ):  $\nu$  3034, 2930, 1714, 1640, 1599, 1448, 1155, 747, 700; HRMS (ESI)  $m/z$  calculated for  $\text{C}_{16}\text{H}_{19}\text{O}$  [ $\text{M} + \text{H}$ ] $^{+}$ : 227.1436, found: 227.1438.

#### (Z)-8-chloro-3-phenyloct-3-en-2-one (3n)

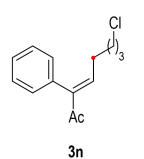

Compound **3n** was synthesized through general procedure G and purified by column chromatography on silica gel (PE/EA = 80 : 1), as a yellow oil (37.8 mg, 80%).  $^1\text{H}$  NMR (400 MHz, Chloroform-*d*)  $\delta$  7.39 – 7.31 (m, 3H), 7.25 – 7.22 (m, 2H), 5.90 (t,  $J = 7.6$  Hz, 1H), 3.57 (t,  $J = 6.6$  Hz, 2H), 2.36 (q,  $J = 7.6$  Hz, 2H), 2.20 (s, 3H), 1.84 (p,  $J = 6.8$  Hz, 2H), 1.66 (q,  $J = 7.6$  Hz, 2H);  $^{13}\text{C}$  NMR (101 MHz, Chloroform-*d*)  $\delta$  203.8, 143.8, 138.0, 135.4, 128.7, 127.8, 127.2, 44.8, 32.1, 31.0, 28.8, 26.8; IR ( $\text{cm}^{-1}$ ):  $\nu$  3065, 2928, 1712, 1640, 1608, 1450, 1126, 933, 762, 692; HRMS (ESI)  $m/z$  calculated for  $\text{C}_{14}\text{H}_{18}\text{OCl}$  [ $\text{M} + \text{H}$ ] $^{+}$ :

237.1048, found: 237.1046.

#### 4-methyl-2-phenylpent-3-enal (**3o**)<sup>[29]</sup>

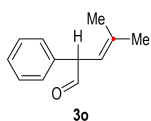

Compound **3o** was synthesized through general procedure G and purified by column chromatography on silica gel (PE/EA = 80 : 1), as a yellow oil (15.3 mg, 44%). **<sup>1</sup>H NMR (400 MHz, Chloroform-*d*)**  $\delta$  9.57 (d,  $J$  = 2.4 Hz, 1H), 7.34 (d,  $J$  = 7.4 Hz, 2H), 7.28 (s, 1H), 7.23 (s, 2H), 5.51 (d,  $J$  = 8.8 Hz, 1H), 4.39 (d,  $J$  = 8.8 Hz, 1H), 1.81 (s, 3H), 1.68 (s, 3H).

#### 4-methyl-2-phenylpent-3-enal (**3o''**)<sup>[30]</sup>

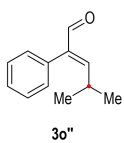

Compound **3o''** was synthesized through general procedure G and purified by column chromatography on silica gel (PE/EA = 80 : 1), as a yellow oil (7.6 mg, 22%). **<sup>1</sup>H NMR (400 MHz, Chloroform-*d*)**  $\delta$  9.51 (s, 1H), 7.31 (t,  $J$  = 7.3 Hz, 2H), 7.27 - 7.22 (m, 1H), 7.06 (d,  $J$  = 7.7 Hz, 2H), 6.40 (d,  $J$  = 10.4 Hz, 1H), 2.74 - 2.62 (m, 1H), 0.99 (s, 6H).

## 10.4 Characterization data for aldehydes or alcohols 3

#### 5-methyl-3,3-diphenylhex-4-en-2-one (**3p**)

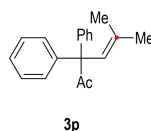

Compound **3p** was synthesized through general procedure G and purified by column chromatography on silica gel (PE/EA = 50 : 1), as a yellow oil (21.0 mg, 40%). **<sup>1</sup>H NMR (400 MHz, Chloroform-*d*)**  $\delta$  7.20 (q,  $J$  = 8.4, 7.2 Hz, 8H), 7.13 - 7.08 (m, 2H), 6.05 (s, 1H), 2.06 (s, 3H), 1.81 (s, 3H), 1.19 (s, 3H); **<sup>13</sup>C NMR (101 MHz, Chloroform-*d*)**  $\delta$  205.8, 143.0, 139.1, 128.9, 128.2, 126.4, 126.1, 67.9, 28.5, 27.3, 20.2; **IR (cm<sup>-1</sup>):**  $\nu$  3024, 2925, 1714, 1694, 1599, 1395, 1142, 956, 704. **HRMS (ESI) m/z** calculated for C<sub>19</sub>H<sub>20</sub>ONa [M + Na]<sup>+</sup>: 287.1412, found: 287.1409.

#### 4-methyl-2,2-diphenylpent-3-en-1-ol (**3q**)

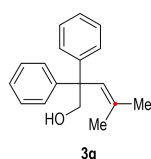

Compound **3q** was synthesized through general procedure G and purified by column chromatography on silica gel (PE/EA = 50 : 1), as a yellow oil (40.3 mg, 80%). **<sup>1</sup>H NMR (400 MHz, Chloroform-*d*)**  $\delta$  7.24 (d,  $J$  = 4.4 Hz, 8H), 7.16 (dt,  $J$  = 8.4, 4.4 Hz, 2H), 5.80 (s, 1H), 4.08 (d,  $J$  = 6.8 Hz, 2H), 1.77 (s, 3H), 1.37 (t,  $J$  = 6.8 Hz, 1H), 1.07 (s, 3H); **<sup>13</sup>C NMR (101 MHz, Chloroform-*d*)**  $\delta$  144.6, 136.6, 129.0, 128.8, 128.3, 126.4, 70.6, 55.5, 27.6, 20.1; **IR (cm<sup>-1</sup>):**  $\nu$  3357, 3057, 2922, 1654, 1598, 1466, 1376, 1004, 757, 700; **HRMS (ESI) m/z** calculated for C<sub>18</sub>H<sub>20</sub>ONa [M + Na]<sup>+</sup>: 275.1412, found: 275.1412.

#### 2-([1,1'-biphenyl]-4-yl)-4-methyl-2-phenylpent-3-en-1-ol (**3r**)

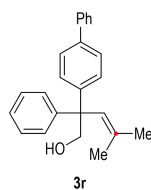

Compound **3r** was synthesized through general procedure G and purified by column chromatography on silica gel (PE/EA = 90 : 1), as a yellow oil (40.6 mg, 62%). **<sup>1</sup>H NMR (400 MHz, Chloroform-*d*)**  $\delta$  7.60 (d,  $J$  = 7.2 Hz, 2H), 7.55 (d,  $J$  = 8.4 Hz, 2H), 7.47 - 7.31 (m, 10H), 5.89 (s, 1H), 4.20 (s, 2H), 1.86 (s, 3H), 1.19 (s, 3H); **<sup>13</sup>C NMR (101 MHz, Chloroform-*d*)**  $\delta$  144.5, 143.6, 140.7, 139.05, 136.75, 129.23, 128.86, 128.81, 128.79, 128.38, 127.24, 127.00, 126.94, 126.4, 70.6, 55.3, 27.6, 20.2; **IR**

(**cm**<sup>-1</sup>):  $\nu$  3513, 3058, 2927, 1690, 1599, 1465, 1448, 1268, 1006, 736, 701; **HRMS** (ESI)  $m/z$  calculated for C<sub>24</sub>H<sub>25</sub>O [M + H]<sup>+</sup>: 329.1905, found: 329.1895.

#### ethyl 4-(4-methyl-1-oxo-2-phenylpent-3-en-2-yl)benzoate (**3s**)

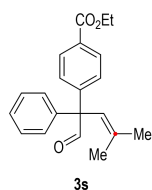

Compound **3s** was synthesized through general procedure G and purified by column chromatography on silica gel (PE/EA = 20 : 1), as a yellow oil (45.1 mg, 70%). **<sup>1</sup>H NMR (400 MHz, Chloroform-*d*)**  $\delta$  9.76 (s, 1H), 8.00 (d,  $J$  = 8.4 Hz, 2H), 7.37 – 7.32 (m, 4H), 7.30 – 7.27 (m, 1H), 7.24 (d,  $J$  = 1.6 Hz, 1H), 7.22 (s, 1H), 5.93 – 5.82 (m, 1H), 4.37 (q,  $J$  = 7.2 Hz, 2H), 1.91 (s, 3H), 1.38 (t,  $J$  = 7.2 Hz, 3H), 1.31 – 1.29 (d,  $J$  = 0.8 Hz, 3H); **<sup>13</sup>C NMR (101 MHz, Chloroform-*d*)**  $\delta$  195.2, 166.3, 146.1, 141.0, 140.4, 129.6, 129.2, 129.1, 128.9, 128.8, 127.3, 123.5, 65.7, 61.0, 27.2, 20.6, 14.3; **IR (cm<sup>-1</sup>):**  $\nu$  3058, 2929, 2850, 2800, 2721, 1734, 1718, 1643, 1607, 1447, 1367, 1276, 1105, 1021, 770, 714; **HRMS** (ESI)  $m/z$  calculated for C<sub>21</sub>H<sub>23</sub>O<sub>3</sub> [M + H]<sup>+</sup>: 323.1647, found: 323.1647.

#### 2-(2-chlorophenyl)-4-methyl-2-phenylpent-3-en-1-ol (**3t**)

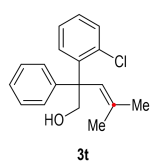

Compound **3t** was synthesized through general procedure G and purified by column chromatography on silica gel (PE/EA = 50 : 1), as a yellow oil (42.6 mg, 75%). **<sup>1</sup>H NMR (400 MHz, Chloroform-*d*)**  $\delta$  7.40 (m, 1H), 7.33 – 7.28 (m, 4H), 7.24 (s, 1H), 7.21 (t,  $J$  = 6.0 Hz, 3H), 6.11 (s, 1H), 3.36 (d,  $J$  = 4.4 Hz, 2H), 0.94 (s, 3H), 0.92 (s, 3H); **<sup>13</sup>C NMR (101 MHz, Chloroform-*d*)**  $\delta$  149.6, 147.2, 146.1, 142.7, 139.0, 136.8, 132.2, 129.7, 128.9, 127.2, 126.6, 126.2, 72.7, 39.8, 25.0, 24.6; **IR (cm<sup>-1</sup>):**  $\nu$  3394, 3003, 2922, 1654, 1529, 1466, 1261 1005, 751; **HRMS** (ESI)  $m/z$  calculated for C<sub>18</sub>H<sub>18</sub>OCl [M + H]<sup>+</sup>: 285.1046, found: 285.1049.

#### 2,4-dimethyl-2-phenylpent-3-en-1-ol (**3u**)

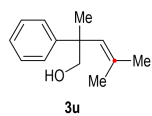

Compound **3u** was synthesized through general procedure G and purified by column chromatography on silica gel (PE/EA = 60 : 1), as a yellow oil (31.0 mg, 83%). **<sup>1</sup>H NMR (400 MHz, Chloroform-*d*)**  $\delta$  7.38 – 7.34 (m, 2H), 7.31 (t,  $J$  = 7.6 Hz, 2H), 7.20 (t,  $J$  = 7.2 Hz, 1H), 5.47 (s, 1H), 3.68 – 3.54 (m, 2H), 1.81 – 1.71 (d,  $J$  = 1.2 Hz, 3H), 1.47 (s, 3H), 1.37 – 1.31 (m, 1H), 1.23 – 1.16 (d,  $J$  = 0.8 Hz, 3H); **<sup>13</sup>C NMR (101 MHz, Chloroform-*d*)**  $\delta$  146.16, 135.05, 129.85, 128.30, 127.19, 125.95, 73.24, 45.31, 26.98, 23.62, 19.69; **IR (cm<sup>-1</sup>):**  $\nu$  3357, 3057, 2922, 1649, 1603, 1466, 1376, 1125, 1001, 800, 699; **HRMS** (ESI)  $m/z$  calculated for C<sub>13</sub>H<sub>19</sub>O [M + H]<sup>+</sup>: 191.1436, found: 191.1440.

#### 2,4-dimethyl-2-(naphthalen-2-yl)pent-3-enal (**3v**)

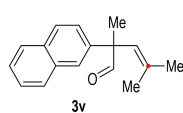

Compound **3v** was synthesized through general procedure G and purified by column chromatography on silica gel (PE/EA = 50 : 1), as a yellow oil (31.5 mg, 73%). **<sup>1</sup>H NMR (400 MHz, Chloroform-*d*)**  $\delta$  9.63 (s, 1H), 7.83 (dd,  $J$  = 9.2, 4.4 Hz, 3H), 7.73 (d,  $J$  = 1.6 Hz, 1H), 7.51 – 7.46 (m, 2H), 7.43 (dd,  $J$  = 8.8, 2.0 Hz, 1H), 5.63 – 5.60 (m, 1H), 1.87 (d,  $J$  = 1.2 Hz, 3H), 1.64 (s, 3H), 1.40 (d,  $J$  = 1.2 Hz, 3H); **<sup>13</sup>C NMR (101 MHz, Chloroform-*d*)**  $\delta$  199.0, 139.1, 138.5, 133.5, 132.3, 128.6, 128.0, 127.6, 126.2, 126.1, 126.0, 125.8, 125.1, 56.3, 27.0, 23.2, 20.1; **IR (cm<sup>-1</sup>):**  $\nu$  3053, 2918, 2854, 2800, 2720, 1700, 1596, 1379, 1113, 1041, 949, 854, 809, 742; **HRMS** (ESI)  $m/z$  calculated for C<sub>15</sub>H<sub>20</sub>ONa [M + Na]<sup>+</sup>: 239.1412, found: 239.1413.

### 2,4-dimethyl-2-(thiophen-2-yl)pent-3-en-1-ol (**3w**)

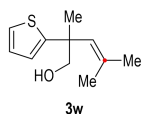

Compound **3w** was synthesized through general procedure G and purified by column chromatography on silica gel (PE/EA = 40 : 1), as a yellow oil (25.9 mg, 66%). **<sup>1</sup>H NMR (400 MHz, Chloroform-*d*)**  $\delta$  7.19 (dd,  $J = 5.2, 1.0$  Hz, 1H), 6.94 (dd,  $J = 5.2, 3.6$  Hz, 1H), 6.88 (dd,  $J = 3.6, 1.2$  Hz, 1H), 5.50 – 5.45 (m, 1H), 3.66 – 3.50 (m, 2H), 1.74 (d,  $J = 1.2$  Hz, 3H), 1.52 (s, 3H), 1.39 (d,  $J = 1.2$  Hz, 3H); **<sup>13</sup>C NMR (101 MHz, Chloroform-*d*)**  $\delta$  151.6, 136.6, 129.4, 126.6, 124.1, 124.0, 73.7, 44.1, 27.1, 24.8, 19.6; **IR (cm<sup>-1</sup>):**  $\nu$  3361, 3003, 2958, 1654, 1633, 1469, 1379, 1260, 1019, 800; **HRMS (ESI) m/z** calculated for C<sub>11</sub>H<sub>17</sub>OS [M + H]<sup>+</sup>: 197.1000, found: 197.0992.

### 2-(3-bromophenyl)-2,4-dimethylpent-3-enal (**3x**)

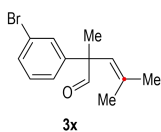

Compound **3x** was synthesized through general procedure G and purified by column chromatography on silica gel (PE/EA = 80 : 1), as a white solid (41.5 mg, 78%). **<sup>1</sup>H NMR (400 MHz, Chloroform-*d*)**  $\delta$  9.50 (s, 1H), 7.44 (s, 1H), 7.39 (td,  $J = 4.4, 2.0$  Hz, 1H), 7.23 – 7.19 (m, 2H), 5.45 (s, 1H), 1.83 (s, 3H), 1.51 (s, 3H), 1.39 (s, 3H); **<sup>13</sup>C NMR (101 MHz, Chloroform-*d*)**  $\delta$  198.2, 139.0, 130.6, 130.3, 130.1, 126.2, 124.6, 26.9, 23.4, 20.2; **IR (cm<sup>-1</sup>):**  $\nu$  3058, 2925, 2854, 2801, 2728, 1729, 1648, 1591, 1461, 1229, 1094, 1014; **HRMS (ESI) m/z** calculated for C<sub>13</sub>H<sub>16</sub>OBr [M + H]<sup>+</sup>: 267.0385, found: 267.0381.

### 2-(benzo[*b*]thiophen-2-yl)-2,4-dimethylpent-3-enal (**3y**)

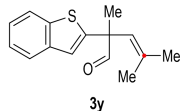

Compound **3y** was synthesized through general procedure G and purified by column chromatography on silica gel (PE/EA = 50 : 1), as a yellow oil (30.2 mg, 62%). **<sup>1</sup>H NMR (400 MHz, Chloroform-*d*)**  $\delta$  9.47 (s, 1H), 7.71 (d,  $J = 8.0$  Hz, 1H), 7.64 (d,  $J = 8.0$  Hz, 1H), 7.30 – 7.21 (m, 2H), 7.19 (s, 1H), 7.10 (s, 1H), 5.56 (s, 1H), 1.79 (s, 3H), 1.59 (s, 3H), 1.47 (s, 3H); **<sup>13</sup>C NMR (101 MHz, Chloroform-*d*)**  $\delta$  197.3, 146.9, 139.9, 139.7, 125.0, 124.3, 124.1, 123.4, 122.2, 121.7, 54.0, 26.8, 23.8, 20.0; **IR (cm<sup>-1</sup>):**  $\nu$  3027, 2922, 2852, 2802, 2720, 1719, 1700, 1654, 1630, 1560, 1466, 1378, 1261, 749; **HRMS (ESI) m/z** calculated for C<sub>15</sub>H<sub>17</sub>OS [M + H]<sup>+</sup>: 245.1000, found: 245.0997.

### 2-(3,5,5,7,8,8-hexamethyl-5,6,7,8-tetrahydronaphthalen-2-yl)-2,4-dimethylpent-3-en-1-ol (**3z**)

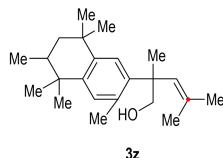

Compound **3z** was synthesized through general procedure G and purified by column chromatography on silica gel (PE/EA = 40 : 1), as a yellow oil (25.5 mg, 39%). **<sup>1</sup>H NMR (400 MHz, Chloroform-*d*)**  $\delta$  7.10 (s, 1H), 6.94 (s, 1H), 5.20 – 5.17 (m, 1H), 3.50 (d,  $J = 5.6$  Hz, 2H), 2.31 (s, 1H), 2.22 (s, 3H), 2.03 (d,  $J = 1.2$  Hz, 3H), 1.31 (s, 3H), 1.28 (s, 3H), 1.25 (s, 3H), 1.25 (s, 3H), 1.22 (s, 6H), 1.06 (s, 2H), 0.98 (d,  $J = 2.0$  Hz, 2H), 0.97 (d,  $J = 2.0$  Hz, 2H); **<sup>13</sup>C NMR (101 MHz, Chloroform-*d*)**  $\delta$  156.5, 144.1, 142.0, 138.4, 134.9, 131.3, 128.4, 125.8, 72.3, 43.8, 38.6, 37.4, 34.6, 34.0, 32.4, 32.1, 28.6, 25.4, 25.4, 25.0, 19.7, 19.6, 16.9; **IR (cm<sup>-1</sup>):**  $\nu$  3356, 3056, 2922, 1654, 1634, 1459, 1261, 1125, 1002, 800, 750, 700; **HRMS (ESI) m/z** calculated for C<sub>23</sub>H<sub>37</sub>O [M + H]<sup>+</sup>: 328.2779, found: 328.2781.

### ethyl 4-(1-cyclohexylidene-3-oxo-2-phenylpropan-2-yl)benzoate (**3aa**)

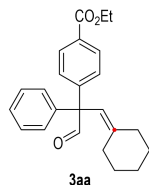

Compound **3aa** was synthesized through general procedure G and purified by

column chromatography on silica gel (PE/EA = 20 : 1), as a yellow oil (43.4 mg, 60%). **<sup>1</sup>H NMR (400 MHz, Chloroform-*d*)**  $\delta$  9.77 (s, 1H), 8.00 (d,  $J$  = 8.4 Hz, 2H), 7.35 (dt,  $J$  = 7.6, 3.2 Hz, 4H), 7.29 (d,  $J$  = 7.6 Hz, 1H), 7.25 – 7.22 (m, 2H), 5.79 (s, 1H), 4.37 (q,  $J$  = 7.2 Hz, 2H), 2.29 – 2.23 (m, 2H), 1.74 – 1.70 (m, 2H), 1.44 (d,  $J$  = 7.2 Hz, 1H), 1.42 (s, 2H), 1.38 (t,  $J$  = 7.2 Hz, 4H), 1.29 (s, 2H); **<sup>13</sup>C NMR (101 MHz, Chloroform-*d*)**  $\delta$  195.4, 166.4, 148.7, 146.5, 140.8, 129.6, 129.1, 129.0, 128.8, 128.8, 127.3, 120.5, 65.4, 61.0, 38.1, 31.3, 28.6, 26.3, 26.0, 14.4; **IR (cm<sup>-1</sup>)**:  $\nu$  3058, 2922, 2850, 2800, 2721, 1734, 1719, 1653, 1577, 1466, 1378, 1365, 1275, 1182, 1105, 1022, 715; **HRMS (ESI) m/z** calculated for C<sub>24</sub>H<sub>27</sub>O<sub>3</sub> [M + H]<sup>+</sup>: 363.1960, found: 363.1958.

(1-(2-methylprop-1-en-1-yl)-1,2,3,4-tetrahydronaphthalen-1-yl)methanol (**3ab**)

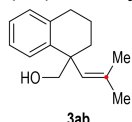

Compound **3ab** was synthesized through general procedure G and purified by column chromatography on silica gel (PE/EA = 50 : 1), as a yellow oil (27.6 mg, 64%). **<sup>1</sup>H NMR (400 MHz, Chloroform-*d*)**  $\delta$  7.25 – 7.19 (m, 1H), 7.13 – 7.05 (m, 3H), 5.55 (s, 1H), 3.71 (d,  $J$  = 10.8 Hz, 1H), 3.58 (d,  $J$  = 10.8 Hz, 1H), 2.81 (t,  $J$  = 5.6 Hz, 2H), 2.10 – 2.01 (m, 1H), 1.88 – 1.78 (m, 3H), 1.71 (d,  $J$  = 1.2 Hz, 3H), 1.57 (s, 1H), 1.12 (d,  $J$  = 1.2 Hz, 3H); **<sup>13</sup>C NMR (101 MHz, Chloroform-*d*)**  $\delta$  140.8, 137.9, 133.6, 130.9, 129.1, 128.6, 126.0, 125.8, 71.3, 44.7, 32.1, 30.3, 27.3, 19.7, 19.2; **IR (cm<sup>-1</sup>)**:  $\nu$  3367, 3058, 2928, 1663, 1485, 1446, 1376, 1144, 1100, 1041, 1018, 756, 729; **HRMS (ESI) m/z** calculated for C<sub>15</sub>H<sub>20</sub>ONa [M + Na]<sup>+</sup>: 239.1412, found: 239.1409.

5-(2-methylprop-1-en-1-yl)-5,6,7,8-tetrahydro-4H-cyclohepta[b]thiophen-4-one (**3ac-1**)

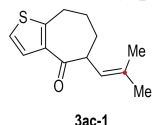

Compound **3ac-1** was synthesized through general procedure G and purified by column chromatography on silica gel (PE/EA = 50 : 1), as a yellow oil (29.0 mg, 66%). **<sup>1</sup>H NMR (400 MHz, Chloroform-*d*)**  $\delta$  7.06 (d,  $J$  = 5.2 Hz, 1H), 6.71 (d,  $J$  = 5.2 Hz, 1H), 6.11 – 6.05 (m, 1H), 3.69 (dt,  $J$  = 7.6, 3.6 Hz, 1H), 2.81 (t,  $J$  = 5.6 Hz, 2H), 2.17 (d,  $J$  = 1.2 Hz, 3H), 2.09 – 1.98 (m, 2H), 1.98 – 1.90 (m, 1H), 1.88 (d,  $J$  = 1.2 Hz, 3H), 1.83 – 1.75 (m, 1H); **<sup>13</sup>C NMR (101 MHz, Chloroform-*d*)**  $\delta$  201.8, 157.0, 137.4, 132.6, 127.2, 122.3, 122.0, 50.8, 27.9, 26.6, 24.9, 22.0, 21.0; **IR (cm<sup>-1</sup>)**:  $\nu$  3092, 2922, 1712, 1654, 1630, 1560, 1466, 1378, 1261; **HRMS (ESI) m/z** calculated for C<sub>13</sub>H<sub>17</sub>OS [M + H]<sup>+</sup>: 221.1000, found: 221.0997.

## 10.5 Characterization data for Dihydrofuran Products 3'

methyl 2,2,5-trimethyl-4-phenyl-2,3-dihydrofuran-3-carboxylate (**3a'**)

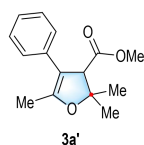

Compound **3a'** was synthesized through general procedure G and purified by column chromatography on silica gel (PE/EA = 40 : 1), as a yellow oil (27.3 mg, 61%). **<sup>1</sup>H NMR (400 MHz, Chloroform-*d*)**  $\delta$  7.32 – 7.25 (m, 2H), 7.22 (t,  $J$  = 7.2 Hz, 1H), 7.06 (d,  $J$  = 7.2 Hz, 2H), 3.93 (s, 1H), 3.53 (s, 3H), 2.33 (d,  $J$  = 1.2 Hz, 3H), 1.48 (s, 3H), 0.89 (s, 3H); **<sup>13</sup>C NMR (101 MHz, Chloroform-*d*)**  $\delta$  168.2, 166.6, 140.4, 128.2, 126.8, 105.6, 89.3, 57.7, 50.7, 29.6, 24.4, 14.6; **IR (cm<sup>-1</sup>)**:  $\nu$  3062, 2927, 1735, 1603, 1495, 1454, 1435, 1379, 1326, 1227, 1168, 1135, 1076, 986, 946, 810, 701; **HRMS (ESI) m/z** calculated for C<sub>15</sub>H<sub>19</sub>O<sub>3</sub> [M + Na]<sup>+</sup>: 247.1334, found: 247.1338.

methyl 2,2,5-trimethyl-4-(*p*-tolyl)-2,3-dihydrofuran-3-carboxylate (**3b'**)

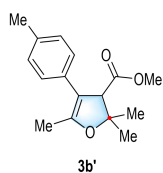

Compound **3b'** was synthesized through general procedure G and purified by column chromatography on silica gel (PE/EA = 20 : 1), as a yellow oil (32.2 mg, 62%). **<sup>1</sup>H NMR (400 MHz, Chloroform-*d*)**  $\delta$  7.01 (d,  $J$  = 8.0 Hz, 2H), 6.87 (d,  $J$  = 8.0 Hz, 2H), 3.82 (s, 1H), 3.47 (s, 3H), 2.26 – 2.23 (m, 6H), 1.39 (s, 3H), 0.82 (s, 3H); **<sup>13</sup>C NMR (101 MHz, Chloroform-*d*)**  $\delta$  168.0, 166.7, 137.3, 136.3, 128.9, 105.7, 89.2, 57.3, 50.7, 29.6, 24.4, 21.1, 14.6 ; **IR (cm<sup>-1</sup>):**  $\nu$  3054, 2923, 1735, 1654, 1636, 1559, 1459, 1378, 1133, 749; **HRMS (ESI)**  $m/z$  calculated for C<sub>16</sub>H<sub>21</sub>O<sub>3</sub> [M + H]<sup>+</sup>: 261.1491, found: 261.1489.

methyl 4-(4-methoxyphenyl)-2,2,5-trimethyl-2,3-dihydrofuran-3-carboxylate (**3c'**)

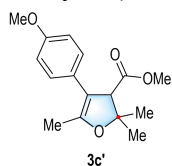

Compound **3c'** was synthesized through general procedure G and purified by column chromatography on silica gel (PE/EA = 20 : 1), as a yellow oil (33.7 mg, 61%). **<sup>1</sup>H NMR (400 MHz, Chloroform-*d*)**  $\delta$  6.97 (d,  $J$  = 8.4 Hz, 2H), 6.82 (d,  $J$  = 8.8 Hz, 2H), 3.87 (s, 1H), 3.79 (s, 3H), 3.54 (s, 3H), 2.32 (d,  $J$  = 1.2 Hz, 3H), 1.45 (s, 3H), 0.90 (s, 3H); **<sup>13</sup>C NMR (101 MHz, Chloroform-*d*)**  $\delta$  167.9, 166.7, 158.4, 132.6, 113.5, 105.8, 89.3, 56.9, 55.2, 50.8, 29.5, 24.3, 14.6; **IR (cm<sup>-1</sup>):**  $\nu$  3053, 2922, 1735, 1640, 1611, 1512, 1465, 1379, 1247, 1168, 1136, 1074, 1036, 985, 832, 761; **HRMS (ESI)**  $m/z$  calculated for C<sub>16</sub>H<sub>21</sub>O<sub>4</sub> [M + H]<sup>+</sup>: 277.1440, found: 277.1437.

methyl 4-(4-chlorophenyl)-2,2,5-trimethyl-2,3-dihydrofuran-3-carboxylate (**3d'**)

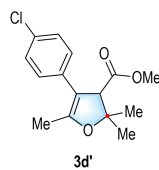

Compound **3d'** was synthesized through general procedure G and purified by column chromatography on silica gel (PE/EA = 20 : 1), as a yellow oil (28.0 mg, 50%). **<sup>1</sup>H NMR (400 MHz, Chloroform-*d*)**  $\delta$  7.26 (s, 1H), 7.24 (s, 1H), 7.00 (d,  $J$  = 8.4 Hz, 2H), 3.90 (s, 1H), 3.54 (s, 3H), 2.34 – 2.31 (m, 3H), 1.47 (s, 3H), 0.90 (s, 3H); **<sup>13</sup>C NMR (101 MHz, Chloroform-*d*)**  $\delta$  168.4, 166.4, 139.0, 132.5, 128.4, 105.4, 89.1, 57.1, 50.8, 29.6, 24.4, 14.6; **IR (cm<sup>-1</sup>):**  $\nu$  3062, 2922, 1732, 1660, 1557, 1407, 1410, 125, 1041, 800, 696; **HRMS (ESI)**  $m/z$  calculated for C<sub>15</sub>H<sub>18</sub>O<sub>3</sub>Cl [M + H]<sup>+</sup>: 281.0944, found: 281.0944.

methyl 4-(4-(methoxycarbonyl)phenyl)-2,2,5-trimethyl-2,3-dihydrofuran-3-carboxylate (**3e'**)

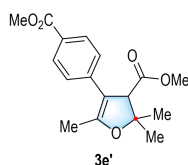

Compound **3e'** was synthesized through general procedure G and purified by column chromatography on silica gel (PE/EA = 20 : 1), as a yellow oil (43.2 mg, 71%). **<sup>1</sup>H NMR (400 MHz, Chloroform-*d*)**  $\delta$  7.96 (d,  $J$  = 8.4 Hz, 2H), 7.14 (d,  $J$  = 8.0 Hz, 2H), 3.99 (s, 1H), 3.90 (s, 3H), 3.52 (s, 3H), 2.34 (s, 3H), 1.49 (s, 3H), 0.89 (s, 3H) ; **<sup>13</sup>C NMR (101 MHz, Chloroform-*d*)**  $\delta$  168.6, 167.0, 166.3, 145.9, 129.6, 128.9, 105.2, 89.1, 57.7, 52.0, 50.8, 29.7, 24.4, 14.6; **IR (cm<sup>-1</sup>):**  $\nu$  3053, 2923, 1751, 1725, 1642, 1459, 1437, 1379, 1281, 1169, 1137, 1113, 1075, 986; **HRMS (ESI)**  $m/z$  calculated for C<sub>17</sub>H<sub>21</sub>O<sub>5</sub> [M + H]<sup>+</sup>: 305.1389, found: 305.1386.

methyl 2,2,5-trimethyl-4-(4-(trifluoromethyl)phenyl)-2,3-dihydrofuran-3-carboxylate (**3f'**)

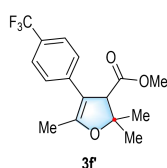

Compound **3f'** was synthesized through general procedure G and purified by column chromatography on silica gel (PE/EA = 20 : 1), as a yellow oil (44.6 mg, 71%). **<sup>1</sup>H NMR (400 MHz, Chloroform-*d*)**  $\delta$  7.54 (d,  $J$  = 8.0 Hz, 2H), 7.19 (d,  $J$  = 8.0 Hz, 2H), 3.99 (s, 1H), 3.54 (s, 3H), 2.34 (s, 3H), 1.50 (s, 3H), 0.89 (s, 3H);

$^{13}\text{C}$  NMR (101 MHz, Chloroform-*d*)  $\delta$  168.7, 166.3, 148.9, 144.6, 128.4, 125.2, 125.2, 125.2, 125.1, 105.2, 89.0, 57.6, 50.8, 29.7, 24.4, 14.6;  $^{19}\text{F}$  NMR (377 MHz,  $\text{CDCl}_3$ )  $\delta$  -62.3; IR ( $\text{cm}^{-1}$ ):  $\nu$  3052, 2928, 1734, 1642, 1618, 1438, 1380, 1326, 1167, 1126, 1068, 1018, 986, 853, 834; HRMS (ESI)  $m/z$  calculated for  $\text{C}_{16}\text{H}_{18}\text{O}_3\text{F}_3$   $[\text{M} + \text{H}]^+$ : 315.1208, found: 315.1212.

methyl 4-(2,3-dihydrobenzofuran-5-yl)-2,2,5-trimethyl-2,3-dihydrofuran-3-carboxylate (**3g'**)

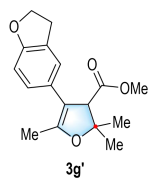

Compound **3g'** was synthesized through general procedure G and purified by column chromatography on silica gel (PE/EA = 40 : 1), as a yellow solid (34.6 mg, 60%).  $^1\text{H}$  NMR (400 MHz, Chloroform-*d*)  $\delta$  6.86 (s, 1H), 6.79 (d,  $J$  = 8.0 Hz, 1H), 6.68 (d,  $J$  = 8.0 Hz, 1H), 4.55 (t,  $J$  = 8.8 Hz, 2H), 3.86 – 3.83 (m, 1H), 3.56 (s, 3H), 3.17 (t,  $J$  = 8.8 Hz, 2H), 2.32 (d,  $J$  = 1.2 Hz, 3H), 1.44 (s, 3H), 0.91 (s, 3H);  $^{13}\text{C}$  NMR (101 MHz, Chloroform-*d*)  $\delta$  167.8, 166.8, 159.0, 132.5, 126.8, 108.8, 106.0, 89.4, 71.2, 57.1, 50.8, 29.8, 29.5, 24.3, 14.7; IR ( $\text{cm}^{-1}$ ):  $\nu$  3055, 2922, 1735, 1654, 1637, 1560, 1491, 1466, 1437, 1378, 1247, 985, 764; HRMS (ESI)  $m/z$  calculated for  $\text{C}_{17}\text{H}_{21}\text{O}_4$   $[\text{M} + \text{H}]^+$ : 289.1440, found: 289.1439.

methyl 2,2,5-trimethyl-4-(naphthalen-2-yl)-2,3-dihydrofuran-3-carboxylate (**3h'**)

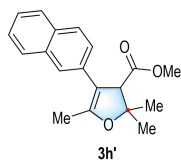

Compound **3h'** was synthesized through general procedure G and purified by column chromatography on silica gel (PE/EA = 40 : 1), as a yellow solid (35.5 mg, 60%).  $^1\text{H}$  NMR (400 MHz, Chloroform-*d*)  $\delta$  7.79 (dt,  $J$  = 11.2, 7.6 Hz, 3H), 7.52 (s, 1H), 7.49 – 7.38 (m, 2H), 7.24 – 7.12 (m, 1H), 4.10 (s, 1H), 3.50 (s, 3H), 2.39 (s, 3H), 1.53 (s, 3H), 0.92 (s, 3H);  $^{13}\text{C}$  NMR (101 MHz, Chloroform-*d*)  $\delta$  168.4, 166.7, 133.7, 133.4, 133.1, 132.7, 132.5, 127.8, 127.8, 127.6, 125.9, 125.6, 125.5, 57.8, 50.8, 31.6, 29.7, 24.5, 14.7; IR ( $\text{cm}^{-1}$ ):  $\nu$  3056, 2925, 1735, 1645, 1437, 1356, 1255; HRMS (ESI)  $m/z$  calculated for  $\text{C}_{19}\text{H}_{21}\text{O}_3$   $[\text{M} + \text{H}]^+$ : 297.1491, found: 297.1493.

methyl 4-(9-ethyl-9H-carbazol-3-yl)-2,2,5-trimethyl-2,3-dihydrofuran-3-carboxylate (**3i'**)

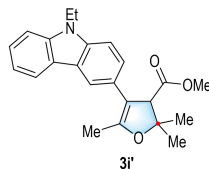

Compound **3i'** was synthesized through general procedure G and purified by column chromatography on silica gel (PE/EA = 30 : 1), as a yellow solid (25.4 mg, 33%).  $^1\text{H}$  NMR (400 MHz, Chloroform-*d*)  $\delta$  8.08 (d,  $J$  = 7.6 Hz, 1H), 7.44 (td,  $J$  = 7.6, 7.2, 1.2 Hz, 1H), 7.38 (d,  $J$  = 8.0 Hz, 1H), 7.31 (d,  $J$  = 8.4 Hz, 1H), 7.26 (s, 1H), 7.24 – 7.18 (m, 1H), 7.16 (d,  $J$  = 8.4 Hz, 1H), 4.35 (q,  $J$  = 7.2 Hz, 2H), 4.12 (s, 1H), 3.51 (s, 3H), 2.40 (s, 3H), 1.57 (s, 3H), 1.44 (t,  $J$  = 7.2 Hz, 3H), 0.91 (s, 3H);  $^{13}\text{C}$  NMR (101 MHz, Chloroform-*d*)  $\delta$  167.9, 166.9, 140.2, 139.2, 131.0, 125.5, 122.8, 120.5, 118.6, 108.4, 108.0, 106.2, 89.6, 57.8, 50.8, 37.6, 29.6, 24.5, 14.8, 13.9; IR ( $\text{cm}^{-1}$ ):  $\nu$  3051, 2923, 1735, 1685, 1636, 1560, 1466, 1380, 1345, 1328, 1233, 1074, 983, 749; HRMS (ESI)  $m/z$  calculated for  $\text{C}_{23}\text{H}_{25}\text{NO}_3\text{Na}$   $[\text{M} + \text{H}]^+$ : 386.1732, found: 386.1723.

methyl 5-cyclohexyl-2,2-dimethyl-4-phenyl-2,3-dihydrofuran-3-carboxylate (**3j'**)

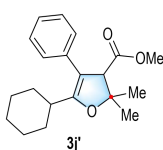

Compound **3j'** was synthesized through general procedure G and purified by column chromatography on silica gel (PE/EA = 20 : 1), as a yellow oil (42.0 mg, 67%).  $^1\text{H}$  NMR (400 MHz, Chloroform-*d*)  $\delta$  7.28 (d,  $J$  = 6.8 Hz, 1H), 7.25 (s, 1H), 7.23 – 7.18 (m, 1H), 7.04 (d,  $J$  = 7.2 Hz, 2H), 3.85 (s, 1H), 3.51 (s, 3H), 1.91 (d,  $J$  = 12.4 Hz, 1H), 1.86 – 1.68 (m, 6H), 1.54 – 1.49 (m, 1H), 1.43 (s, 3H), 1.41

– 1.37 (m, 1H), 1.37 – 1.34 (m, 1H), 1.27 – 1.24 (m, 1H), 0.89 (s, 3H); <sup>13</sup>C NMR (101 MHz, Chloroform-*d*) δ 175.8, 166.6, 140.7, 128.1, 126.7, 103.8, 88.8, 57.4, 50.6, 36.8, 29.9, 29.4, 29.3, 26.0, 25.9, 25.9, 24.1; IR (cm<sup>-1</sup>): ν 3074, 2927, 1735, 1667, 1489, 1412, 1137, 1247, 1170, 1136, 1090, 1014, 938, 843, 830; HRMS (ESI) m/z calculated for C<sub>20</sub>H<sub>27</sub>O<sub>3</sub> [M + H]<sup>+</sup>: 315.1960, found: 315.1962.

#### methyl 2,2-dimethyl-4,5-diphenyl-2,3-dihydrofuran-3-carboxylate (**3k'**)

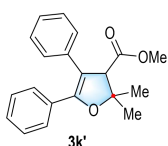

Compound **3k'** was synthesized through general procedure G and purified by column chromatography on silica gel (PE/EA = 20 : 1), as a yellow oil (22.6 mg, 36%). <sup>1</sup>H NMR (400 MHz, Chloroform-*d*) δ 7.86 (dd, *J* = 7.6, 1.6 Hz, 2H), 7.44 (q, *J* = 5.6 Hz, 3H), 7.32 (t, *J* = 7.2 Hz, 2H), 7.26 (t, *J* = 3.6 Hz, 1H), 7.21 – 7.16 (m, 2H), 4.11 (s, 1H), 3.49 (s, 3H), 1.61 (s, 3H), 1.01 (s, 3H); <sup>13</sup>C NMR (101 MHz, Chloroform-*d*) δ 165.8, 165.5, 140.3, 130.6, 130.3, 129.5, 128.3, 127.8, 127.0, 106.2, 88.7, 59.0, 51.0, 29.3, 24.2; IR (cm<sup>-1</sup>): ν 3055, 2923, 1735, 1654, 1629, 1249, 1085, 762, 699; HRMS (ESI) m/z calculated for C<sub>20</sub>H<sub>21</sub>O<sub>3</sub> [M + H]<sup>+</sup>: 309.1491, found: 309.1493.

#### methyl 2-methyl-3-phenyl-1-oxaspiro[4.5]dec-2-ene-4-carboxylate (**3l'**)

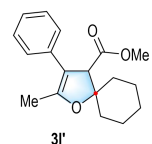

Compound **3l'** was synthesized through general procedure G and purified by column chromatography on silica gel (PE/EA = 30 : 1), as a yellow oil (34.9 mg, 61%). <sup>1</sup>H NMR (400 MHz, Chloroform-*d*) δ 7.19 (t, *J* = 7.2 Hz, 2H), 7.13 (t, *J* = 7.2 Hz, 1H), 7.00 (d, *J* = 6.0 Hz, 2H), 3.80 (s, 1H), 3.44 (s, 3H), 2.27 (s, 3H), 1.90 (d, *J* = 12.8 Hz, 1H), 1.63 (ddd, *J* = 13.2, 8.4, 3.2 Hz, 1H), 1.55 – 1.44 (m, 4H), 1.39 – 1.34 (m, 1H), 1.22 (s, 1H), 1.19 (s, 1H), 0.98 – 0.88 (m, 1H); <sup>13</sup>C NMR (101 MHz, Chloroform-*d*) δ 167.2, 165.7, 138.8, 126.9, 125.7, 105.0, 89.2, 56.4, 49.6, 37.2, 32.2, 24.1, 21.4, 13.6; IR (cm<sup>-1</sup>): ν 3026, 2931, 1735, 1644, 1437, 1379, 1326, 1189, 1081, 987, 701; HRMS (ESI) m/z calculated for C<sub>18</sub>H<sub>23</sub>O<sub>3</sub> [M + H]<sup>+</sup>: 287.1647, found: 287.1651.

#### 1-(2,2,5-trimethyl-4-phenyl-2,3-dihydrofuran-3-yl)ethan-1-one (**3m'**)

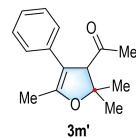

Compound **3m'** was synthesized through general procedure G and purified by column chromatography on silica gel (PE/EA = 20 : 1), as a yellow oil (20.7 mg, 45%). <sup>1</sup>H NMR (400 MHz, Chloroform-*d*) δ 7.27 – 7.21 (m, 2H), 7.18 (d, *J* = 6.0 Hz, 1H), 7.01 (d, *J* = 7.2 Hz, 2H), 3.89 (s, 1H), 2.29 (d, *J* = 1.2 Hz, 3H), 1.79 (s, 3H), 1.43 (s, 3H), 0.84 (s, 3H); <sup>13</sup>C NMR (101 MHz, Chloroform-*d*) δ 194.8, 167.3, 139.2, 127.5, 126.2, 114.2, 88.4, 57.7, 28.7, 28.4, 23.4, 14.4; IR (cm<sup>-1</sup>): ν 3051, 2923, 1719, 1640, 1459, 1437, 1379, 1189, 1075, 751; HRMS (ESI) m/z calculated for C<sub>15</sub>H<sub>19</sub>O<sub>2</sub> [M + H]<sup>+</sup>: 231.1385, found: 231.1389.

#### 1-(4-(4-chlorophenyl)-2,2,5-trimethyl-2,3-dihydrofuran-3-yl)ethan-1-one (**3n'**)

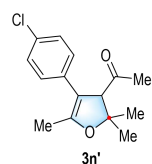

Compound **3n'** was synthesized through general procedure G and purified by column chromatography on silica gel (PE/EA = 40 : 1), as a yellow solid (35.5 mg, 60%). <sup>1</sup>H NMR (400 MHz, Chloroform-*d*) δ 7.31 – 7.26 (m, 2H), 7.02 (d, *J* = 8.0 Hz, 2H), 3.94 (s, 1H), 2.35 (d, *J* = 1.2 Hz, 3H), 1.90 (s, 3H), 1.48 (s, 3H), 0.91 (s, 3H); <sup>13</sup>C NMR (101 MHz, Chloroform-*d*) δ 195.2, 168.4, 138.8, 133.0, 128.8, 115.2, 89.2, 58.0, 29.7, 29.4, 24.4, 15.5; IR (cm<sup>-1</sup>): ν 3056, 2923, 1719, 1667, 1592, 1489, 1377,

1247, 1170, 1136, 938, 843, 830; **HRMS (ESI)**  $m/z$  calculated for  $C_{15}H_{18}O_2Cl$   $[M + H]^+$ : 265.0995, found: 265.0997.

#### phenyl(2,2,5-trimethyl-4-phenyl-2,3-dihydrofuran-3-yl)methanone (**3o'**)

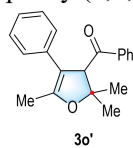

Compound **3o'** was synthesized through general procedure G and purified by column chromatography on silica gel (PE/EA = 30 : 1), as a yellow oil (33.3 mg, 57%). **<sup>1</sup>H NMR (400 MHz, Chloroform-*d*)**  $\delta$  7.55 – 7.50 (m, 2H), 7.42 (dd,  $J = 8.4$ , 6.0 Hz, 1H), 7.35 (t,  $J = 7.2$  Hz, 2H), 7.23 (t,  $J = 7.2$  Hz, 2H), 7.17 (dd,  $J = 8.4$ , 6.0 Hz, 1H), 7.12 – 7.05 (m, 2H), 4.29 (s, 1H), 1.94 (s, 3H), 1.57 (s, 3H), 0.95 (s, 3H); **<sup>13</sup>C NMR (101 MHz, Chloroform-*d*)**  $\delta$  193.2, 167.8, 141.1, 139.7, 130.9, 128.2, 128.1, 127.8, 126.9, 116.3, 89.3, 59.0, 29.6, 24.4, 15.9; **IR (cm<sup>-1</sup>)**:  $\nu$  3051, 2921, 1719, 1676, 1654, 1617, 1597, 1449, 1233, 1209, 975, 759, 693; **HRMS (ESI)**  $m/z$  calculated for  $C_{20}H_{21}O_2$   $[M + H]^+$ : 293.1542, found: 293.1545.

## 10.6 Characterization data for Cyclopropane Products 4

#### ((1R,3R)-2,2-dimethyl-3-phenylcyclopropyl)(phenyl)methanone (**4a**)<sup>[27]</sup>

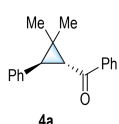

Compound **4a** was synthesized through general procedure H and purified by column chromatography on silica gel (PE/EA = 50 : 1), as a pale oil (37.0 mg, 74%). **<sup>1</sup>H NMR (400 MHz, Chloroform-*d*)**  $\delta$  8.00 (dd,  $J = 8.4$ , 1.2 Hz, 2H), 7.62 – 7.55 (m, 1H), 7.54 – 7.48 (m, 2H), 7.34 – 7.27 (m, 2H), 7.22 (t,  $J = 7.4$  Hz, 3H), 3.13 (d,  $J = 6.0$  Hz, 1H), 2.92 (d,  $J = 6.0$  Hz, 1H), 1.28 (s, 3H), 1.14 (s, 3H).

#### ((1R,3R)-2,2-dimethyl-3-(*p*-tolyl)cyclopropyl)(phenyl)methanone (**4b**)

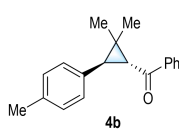

Compound **4b** was synthesized through general procedure H and purified by column chromatography on silica gel (PE/EA = 50 : 1), as a pale oil (42.3 mg, 80%). **<sup>1</sup>H NMR (400 MHz, Chloroform-*d*)**  $\delta$  8.02 – 7.97 (m, 2H), 7.58 (t,  $J = 7.4$  Hz, 1H), 7.50 (t,  $J = 7.4$  Hz, 2H), 7.10 (s, 4H), 3.08 (d,  $J = 6.0$  Hz, 1H), 2.88 (d,  $J = 6.0$  Hz, 1H), 2.33 (s, 3H), 1.27 (s, 3H), 1.13 (s, 3H); **<sup>13</sup>C NMR (101 MHz, Chloroform-*d*)**  $\delta$  198.15, 149.03, 135.92, 134.75, 132.61, 128.87, 128.84, 128.58, 128.04, 37.64, 37.01, 33.08, 22.15, 21.06, 20.31; **IR (cm<sup>-1</sup>)**:  $\nu$  3027, 2967, 1686, 1610, 1477, 1106, 1075, 701; **HRMS (ESI)**  $m/z$  calculated for  $C_{19}H_{21}O$   $[M + H]^+$ : 265.1592, found: 265.1596.

#### ((1R,3R)-3-(4-methoxyphenyl)-2,2-dimethylcyclopropyl)(phenyl)methanone (**4c**)

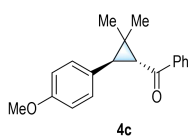

Compound **4c** was synthesized through general procedure G and purified by column chromatography on silica gel (PE/EA = 20 : 1), as a pale oil (43.1 mg, 77%). **<sup>1</sup>H NMR (400 MHz, Chloroform-*d*)**  $\delta$  8.02 – 7.97 (m, 2H), 7.62 – 7.54 (m, 1H), 7.50 (td,  $J = 6.8$ , 1.4 Hz, 2H), 7.12 (d,  $J = 8.4$  Hz, 2H), 6.86 – 6.80 (m, 2H), 3.79 (s, 3H), 3.06 (d,  $J = 6.0$  Hz, 1H), 2.84 (d,  $J = 6.0$  Hz, 1H), 1.26 (s, 3H), 1.13 (s, 3H); **<sup>13</sup>C NMR (101 MHz, Chloroform-*d*)**  $\delta$  198.14, 161.03, 158.20, 139.03, 132.61, 129.98, 128.58, 128.03, 113.60, 55.26, 53.43, 37.87, 36.61, 22.19, 20.25; **IR (cm<sup>-1</sup>)**:  $\nu$  3058, 3024, 2960, 1693, 1599, 1489, 1259, 1103, 702; **HRMS (ESI)**  $m/z$  calculated for  $C_{19}H_{21}O_2$   $[M + H]^+$ : 281.1542, found: 281.1533.

((1R,3R)-3-([1,1'-biphenyl]-4-yl)-2,2-dimethylcyclopropyl)(phenyl)methanone (**4d**)

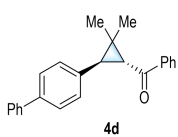

Compound **4d** was synthesized through general procedure G and purified by column chromatography on silica gel (PE/EA = 50 : 1), as a white solid (52.2 mg, 80%). <sup>1</sup>H NMR (400 MHz, Chloroform-*d*) δ 8.04 – 8.00 (m, 2H), 7.62 – 7.56 (m, 3H), 7.53 (dd, *J* = 8.2, 2.0 Hz, 4H), 7.43 (t, *J* = 7.6 Hz, 3H), 7.34 (d, *J* = 9.2 Hz, 1H), 7.28 (d, *J* = 8.2 Hz, 2H), 3.15 (d, *J* = 6.0 Hz, 1H), 2.95 (d, *J* = 6.0 Hz, 1H), 1.30 (s, 3H), 1.18 (s, 3H); <sup>13</sup>C NMR (101 MHz, Chloroform-*d*) δ 197.97, 140.85, 139.28, 138.96, 137.00, 132.69, 129.38, 128.76, 128.61, 128.07, 127.17, 126.99, 126.88, 37.71, 36.94, 33.19, 22.20, 20.35; IR (cm<sup>-1</sup>): ν 3068, 2921, 1715, 1656, 1579, 1448, 1243, 1109, 753; HRMS (ESI) *m/z* calculated for C<sub>24</sub>H<sub>23</sub>O [M + H]<sup>+</sup>: 327.1749, found: 327.1746.

4-((1R,3R)-3-benzoyl-2,2-dimethylcyclopropyl)benzotrile (**4e**)

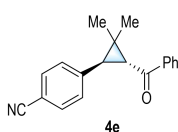

Compound **4e** was synthesized through general procedure G and purified by column chromatography on silica gel (PE/EA = 30 : 1), as a pale oil (39.0 mg, 71%). <sup>1</sup>H NMR (400 MHz, Chloroform-*d*) δ 8.02 – 7.97 (m, 2H), 7.60 (d, *J* = 8.3 Hz, 3H), 7.52 (t, *J* = 7.5 Hz, 2H), 7.32 (d, *J* = 8.1 Hz, 2H), 3.14 (d, *J* = 6.1 Hz, 1H), 2.96 (d, *J* = 6.0 Hz, 1H), 1.27 (s, 3H), 1.13 (s, 3H); <sup>13</sup>C NMR (101 MHz, Chloroform-*d*) δ 198.57, 143.68, 138.53, 132.98, 132.03, 129.69, 128.78, 128.70, 128.06, 118.87, 37.59, 36.55, 33.04, 21.98, 20.27; IR (cm<sup>-1</sup>): ν 3089, 2922, 2227, 1672, 1633, 1607, 1448, 1243, 1111, 690; HRMS (ESI) *m/z* calculated for C<sub>19</sub>H<sub>18</sub>NO [M + H]<sup>+</sup>: 276.1398, found: 276.1398.

methyl 4-((1R,3R)-3-benzoyl-2,2-dimethylcyclopropyl)benzoate (**4f**)

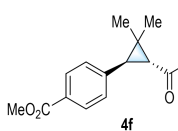

Compound **4f** was synthesized through general procedure G and purified by column chromatography on silica gel (PE/EA = 20 : 1), as a pale oil (47.4 mg, 77%). <sup>1</sup>H NMR (400 MHz, Chloroform-*d*) δ 8.02 – 7.95 (m, 4H), 7.63 – 7.56 (m, 1H), 7.55 – 7.49 (m, 2H), 7.28 (d, *J* = 8.0 Hz, 2H), 3.91 (s, 3H), 3.15 (d, *J* = 6.0 Hz, 1H), 2.97 (d, *J* = 6.0 Hz, 1H), 1.28 (s, 3H), 1.12 (s, 3H); <sup>13</sup>C NMR (101 MHz, Chloroform-*d*) δ 198.14, 161.03, 158.20, 139.03, 132.61, 129.98, 128.58, 128.03, 113.60, 55.26, 53.43, 37.87, 36.61, 22.19, 20.25; IR (cm<sup>-1</sup>): ν 3054, 2921, 1716, 1682, 1660, 1609, 1433, 1283, 1109, 760, 691; HRMS (ESI) *m/z* calculated for C<sub>15</sub>H<sub>19</sub>O<sub>3</sub> [M + H]<sup>+</sup>: 247.1334, found: 247.1338.

((1R,3R)-3-(2-bromophenyl)-2,2-dimethylcyclopropyl)(phenyl)methanone (**4g**)

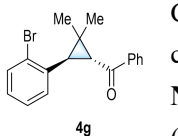

Compound **4g** was synthesized through general procedure G and purified by column chromatography on silica gel (PE/EA = 50 : 1), as a pale oil (34.1 mg, 52%). <sup>1</sup>H NMR (400 MHz, Chloroform-*d*) δ 8.05 – 7.96 (m, 2H), 7.62 – 7.56 (m, 2H), 7.51 (dd, *J* = 8.2, 6.8 Hz, 2H), 7.25 – 7.19 (m, 1H), 7.15 – 7.08 (m, 2H), 3.09 (d, *J* = 6.0 Hz, 1H), 2.90 (d, *J* = 6.0 Hz, 1H), 1.35 (s, 3H), 1.10 (s, 3H); <sup>13</sup>C NMR (101 MHz, Chloroform-*d*) δ 197.55, 138.82, 132.75, 132.54, 129.96, 128.70, 128.63, 128.60, 128.15, 128.07, 127.08, 38.37, 37.32, 21.69, 19.71; IR (cm<sup>-1</sup>): ν 3061, 2969, 1715, 1680, 1596, 1506, 1447, 1239, 749; HRMS (ESI) *m/z* calculated for C<sub>18</sub>H<sub>18</sub>OBr [M + H]<sup>+</sup>: 329.0541, found: 329.0545.

((1R,3R)-2,2-dimethyl-3-(thiophen-2-yl)cyclopropyl)(phenyl)methanone (**4h**)

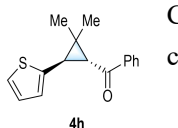

Compound **4h** was synthesized through general procedure G and purified by column chromatography on silica gel (PE/EA = 50 : 1), as a pale oil (27.6 mg, 54%). <sup>1</sup>H

**NMR (400 MHz, Chloroform-*d*)**  $\delta$  8.01 – 7.95 (m, 2H), 7.59 (t, *J* = 7.4 Hz, 1H), 7.50 (t, *J* = 7.4 Hz, 2H), 7.14 (d, *J* = 4.8 Hz, 1H), 6.94 (dd, *J* = 5.0, 3.6 Hz, 1H), 6.81 (d, *J* = 3.6 Hz, 1H), 3.11 (d, *J* = 5.8 Hz, 1H), 2.89 (d, *J* = 5.8 Hz, 1H), 1.25 (s, 3H), 1.23 (s, 3H); **<sup>13</sup>C NMR (101 MHz, Chloroform-*d*)**  $\delta$  198.34, 138.64, 132.82, 128.64, 128.08, 126.73, 126.63, 125.55, 123.85, 39.99, 33.47, 31.50, 21.95, 19.79; **IR (cm<sup>-1</sup>)**:  $\nu$  3051, 2922, 1715, 1668, 1596, 1338, 1238, 1002, 771; **HRMS (ESI)** *m/z* calculated for C<sub>16</sub>H<sub>17</sub>OS [M + H]<sup>+</sup>: 257.1000, found: 257.0995.

((1*R*,3*R*)-2,2-dimethyl-3-(thiophen-3-yl)cyclopropyl)(phenyl)methanone (**4i**)

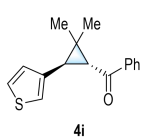

Compound **4i** was synthesized through general procedure G and purified by column chromatography on silica gel (PE/EA = 50 : 1), as a pale oil (26.1 mg, 51%). **<sup>1</sup>H NMR (400 MHz, Chloroform-*d*)**  $\delta$  8.00 – 7.96 (m, 2H), 7.61 – 7.55 (m, 1H), 7.50 (t, *J* = 7.6 Hz, 3H), 6.98 – 6.94 (m, 2H), 2.99 (d, *J* = 5.8 Hz, 1H), 2.83 (d, *J* = 6.0 Hz, 1H), 1.24 (s, 3H), 1.19 (s, 3H); **<sup>13</sup>C NMR (101 MHz, Chloroform-*d*)**  $\delta$  197.72, 153.63, 138.99, 132.65, 128.73, 128.58, 128.02, 125.26, 121.40, 38.86, 32.80, 32.63, 22.00, 19.99; **IR (cm<sup>-1</sup>)**:  $\nu$  3036, 2922, 1715, 1680, 1646, 1448, 1214, 1023, 689; **HRMS (ESI)** *m/z* calculated for C<sub>16</sub>H<sub>17</sub>OS [M + H]<sup>+</sup>: 257.1000, found: 257.0995.

((1*R*,3*R*)-3-(2,3-dihydrobenzo[*b*][1,4]dioxin-6-yl)-2,2-dimethylcyclopropyl)(phenyl)methanone (**4j**)

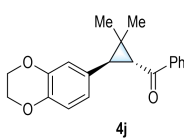

Compound **4j** was synthesized through general procedure G and purified by column chromatography on silica gel (PE/EA = 50 : 1), as a pale oil (41.3 mg, 67%). **<sup>1</sup>H NMR (400 MHz, Chloroform-*d*)**  $\delta$  8.01 – 7.96 (m, 2H), 7.61 – 7.55 (m, 1H), 7.53 – 7.47 (m, 2H), 6.78 (d, *J* = 8.2 Hz, 1H), 6.72 – 6.65 (m, 2H), 4.24 (s, 4H), 3.02 (d, *J* = 6.0 Hz, 1H), 2.82 (d, *J* = 6.0 Hz, 1H), 1.24 (s, 3H), 1.14 (s, 3H); **<sup>13</sup>C NMR (101 MHz, Chloroform-*d*)**  $\delta$  198.05, 143.14, 142.14, 139.00, 132.61, 131.18, 128.57, 128.02, 122.00, 117.64, 116.89, 64.40, 37.76, 36.75, 33.18, 22.15, 20.22; **IR (cm<sup>-1</sup>)**:  $\nu$  3058, 2932, 1657, 1599, 1576, 1284, 1255, 1067, 696; **HRMS (ESI)** *m/z* calculated for C<sub>20</sub>H<sub>21</sub>O<sub>3</sub> [M + H]<sup>+</sup>: 309.1491, found: 309.1483.

((1*R*,3*R*)-3-(6-bromobenzo[*d*][1,3]dioxol-5-yl)-2,2-dimethylcyclopropyl)(phenyl)methanone (**4k**)

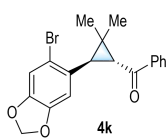

Compound **4k** was synthesized through general procedure G and purified by column chromatography on silica gel (PE/EA = 50 : 1), as a pale oil (41.6 mg, 56%). **<sup>1</sup>H NMR (400 MHz, Chloroform-*d*)**  $\delta$  8.02 – 7.97 (m, 2H), 7.59 (t, *J* = 7.4 Hz, 1H), 7.51 (t, *J* = 7.8 Hz, 2H), 7.05 (s, 1H), 6.62 (s, 1H), 5.97 – 5.94 (m, 2H), 2.99 (d, *J* = 6.0 Hz, 1H), 2.82 – 2.76 (d, *J* = 6.0 Hz, 1H), 1.32 (s, 3H), 1.12 (s, 3H); **<sup>13</sup>C NMR (101 MHz, Chloroform-*d*)**  $\delta$  197.50, 147.05, 138.77, 132.77, 128.63, 128.05, 124.20, 117.07, 112.77, 109.97, 101.70, 94.49, 38.30, 37.77, 33.54, 21.72, 19.70; **IR (cm<sup>-1</sup>)**:  $\nu$  3025, 2927, 1681, 1599, 1454, 1313, 1225, 1028, 743; **HRMS (ESI)** *m/z* calculated for C<sub>19</sub>H<sub>18</sub>O<sub>3</sub>Br [M + H]<sup>+</sup>: 373.0439, found: 373.0426.

((1*R*,3*R*)-3-(9-ethyl-9H-carbazol-3-yl)-2,2-dimethylcyclopropyl)(phenyl)methanone (**4l**)

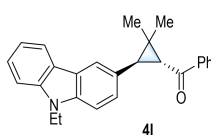

Compound **4l** was synthesized through general procedure G and purified by column chromatography on silica gel (PE/EA = 50 : 1), as a pale oil (44.7 mg, 61%). **<sup>1</sup>H NMR (400 MHz, Chloroform-*d*)**  $\delta$  8.02 – 7.96 (m, 3H), 7.84 – 7.81

(m, 1H), 7.56 – 7.50 (m, 1H), 7.46 (t,  $J = 7.4$  Hz, 2H), 7.40 – 7.36 (m, 1H), 7.32 (d,  $J = 8.2$  Hz, 1H), 7.26 (d,  $J = 0.8$  Hz, 2H), 7.15 – 7.11 (m, 1H), 4.29 (q,  $J = 7.2$  Hz, 2H), 3.25 (d,  $J = 6.0$  Hz, 1H), 2.95 (d,  $J = 6.0$  Hz, 1H), 1.38 (d,  $J = 7.2$  Hz, 3H), 1.27 (s, 3H), 1.11 (s, 3H);  $^{13}\text{C}$  NMR (101 MHz, Chloroform-*d*)  $\delta$  198.34, 140.23, 139.21, 138.84, 132.57, 128.59, 128.28, 128.10, 127.10, 125.61, 122.87, 122.72, 120.43, 120.36, 118.70, 108.46, 108.09, 38.28, 37.60, 37.57, 33.34, 22.38, 20.39, 13.84; IR ( $\text{cm}^{-1}$ ):  $\nu$  3054, 2925, 1670, 1597, 1579, 1430, 1328, 1126, 810; HRMS (ESI)  $m/z$  calculated for  $\text{C}_{26}\text{H}_{26}\text{NO}$   $[\text{M} + \text{H}]^+$ : 368.2014, found: 368.2014.

((1R,3R)-2,2-dimethyl-3-(naphthalen-1-yl)cyclopropyl)(phenyl)methanone (**4m**)

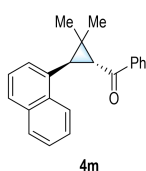

Compound **4m** was synthesized through general procedure G and purified by column chromatography on silica gel (PE/EA = 50 : 1), as a pale oil (30.0 mg, 50%).  $^1\text{H}$  NMR (400 MHz, Chloroform-*d*)  $\delta$  8.10 – 8.04 (m, 3H), 7.95 (dd,  $J = 8.2, 1.2$  Hz, 1H), 7.89 – 7.86 (m, 1H), 7.75 (d,  $J = 8.0$  Hz, 1H), 7.63 – 7.58 (m, 1H), 7.56 (d,  $J = 4.4$  Hz, 1H), 7.53 (s, 1H), 7.52 – 7.51 (m, 1H), 7.44 – 7.41 (m, 1H), 7.37 (d,  $J = 8.2$  Hz, 1H), 3.44 (d,  $J = 6.0$  Hz, 1H), 3.08 (d,  $J = 6.0$  Hz, 1H), 1.48 (s, 3H), 1.02 (s, 3H);  $^{13}\text{C}$  NMR (101 MHz, Chloroform-*d*)  $\delta$  198.21, 138.92, 132.67, 128.62, 128.06, 84.95, 69.32, 68.85, 67.88, 67.56, 66.88, 38.78, 35.12, 33.49, 21.45, 20.18; IR ( $\text{cm}^{-1}$ ):  $\nu$  3056, 2964, 2927, 1685, 1597, 1578, 1447, 1260, 1021, 816; HRMS (ESI)  $m/z$  calculated for  $\text{C}_{22}\text{H}_{21}\text{O}$   $[\text{M} + \text{H}]^+$ : 301.1592, found: 301.1583.

((1R,3R)-Ferrocenyl-2,2-dimethylcyclopropyl)(phenyl)methanone (**4n**)

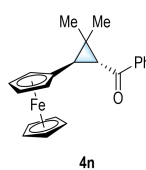

Compound **4n** was synthesized through general procedure G and purified by column chromatography on silica gel (PE/EA = 50 : 1), as a pale oil (53.0 mg, 74%).  $^1\text{H}$  NMR (400 MHz, Chloroform-*d*)  $\delta$  8.03 – 7.98 (m, 2H), 7.62 – 7.56 (m, 1H), 7.55 – 7.48 (m, 2H), 4.26 (dt,  $J = 2.4, 1.2$  Hz, 1H), 4.11 (dd,  $J = 2.4, 1.2$  Hz, 1H), 4.09 (s, 5H), 4.05 (s, 1H), 3.99 – 3.97 (m, 1H), 2.80 (d,  $J = 6.0$  Hz, 1H), 2.57 (d,  $J = 6.0$  Hz, 1H), 1.18 (s, 3H), 1.16 (s, 3H);  $^{13}\text{C}$  NMR (101 MHz, Chloroform-*d*)  $\delta$  198.21, 138.92, 132.67, 128.62, 128.06, 84.95, 69.32, 68.85, 67.88, 67.56, 66.88, 38.78, 35.12, 33.49, 21.45, 20.18; IR ( $\text{cm}^{-1}$ ):  $\nu$  3089, 2926, 1669, 1596, 1579, 1448, 1377, 1242, 1105, 1023, 1001, 819, 690, 484; HRMS (ESI)  $m/z$  calculated for  $\text{C}_{22}\text{H}_{23}\text{FeO}$   $[\text{M} + \text{H}]^+$ : 359.1020, found: 359.1020.

diethyl (2R,3S)-2-benzoyl-3-phenylcyclopropane-1,1-dicarboxylate (**4o**)

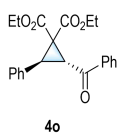

Compound **4o** was synthesized through general procedure G and purified by column chromatography on silica gel (PE/EA = 50 : 1), as a pale oil (48.2 mg, 66%).  $^1\text{H}$  NMR (400 MHz, Chloroform-*d*)  $\delta$  8.11 (dd,  $J = 8.4, 1.2$  Hz, 2H), 7.65 – 7.59 (m, 1H), 7.51 (t,  $J = 7.6$  Hz, 2H), 7.31 (d,  $J = 4.4$  Hz, 4H), 7.30 – 7.27 (m, 1H), 4.18 – 4.10 (m, 3H), 4.01 (q,  $J = 7.2$  Hz, 2H), 3.89 (d,  $J = 7.6$  Hz, 1H), 1.11 (t,  $J = 7.2$  Hz, 3H), 0.99 (t,  $J = 7.2$  Hz, 3H);  $^{13}\text{C}$  NMR (101 MHz, Chloroform-*d*)  $\delta$  193.60, 165.95, 165.72, 136.83, 133.63, 133.51, 128.75, 128.63, 128.60, 128.33, 127.67, 61.90, 46.13, 35.88, 35.03, 13.85; IR ( $\text{cm}^{-1}$ ):  $\nu$  3061, 2981, 1734, 1684, 1597, 1449, 1268, 1216, 1107, 1016, 697; HRMS (ESI)  $m/z$  calculated for  $\text{C}_{22}\text{H}_{23}\text{O}_5$   $[\text{M} + \text{H}]^+$ : 366.1467, found: 366.1467.

(1R,3S)-2,2-dimethyl-3-phenylspiro[cyclopropane-1,2'-inden]-1'(3'H)-one (**4p**)

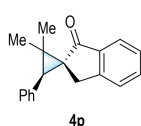

Compound **4p** was synthesized through general procedure G and purified by column

chromatography on silica gel (PE/EA = 50 : 1), as a pale oil (28.8 mg, 55%). **<sup>1</sup>H NMR (400 MHz, Chloroform-*d*)**  $\delta$  7.79 (d, *J* = 7.6 Hz, 1H), 7.60 – 7.54 (m, 1H), 7.42 (dd, *J* = 10.6, 7.6 Hz, 2H), 7.29 (d, *J* = 7.6 Hz, 2H), 7.21 (s, 1H), 7.11 – 7.06 (m, 2H), 3.02 (s, 1H), 2.97 (d, *J* = 7.6 Hz, 2H), 1.59 (s, 3H), 1.24 (s, 3H); **<sup>13</sup>C NMR (101 MHz, Chloroform-*d*)**  $\delta$  204.69, 133.59, 130.50, 128.39, 127.19, 126.66, 125.88, 123.04, 43.22, 29.70, 21.64, 20.29; **IR (cm<sup>-1</sup>)**:  $\nu$  3051, 2921, 1703, 1698, 1659, 1470, 1296, 1108, 747; **HRMS (ESI)** *m/z* calculated for C<sub>19</sub>H<sub>16</sub>O<sub>2</sub>Na [M + Na]<sup>+</sup>: 299.1048, found: 299.1047.

#### methyl 4-((1R,3R)-3-acetyl-2,2-dimethylcyclopropyl)benzoate (**4q**)

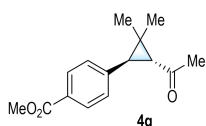

Compound **4q** was synthesized through general procedure G and purified by column chromatography on silica gel (PE/EA = 50 : 1), as a pale oil (37.9 mg, 77%). **<sup>1</sup>H NMR (400 MHz, Chloroform-*d*)**  $\delta$  7.88 (d, *J* = 8.2 Hz, 2H), 7.14 (d, *J* = 8.2 Hz, 2H), 3.83 (s, 3H), 2.80 (d, *J* = 6.0 Hz, 1H), 2.29 (d, *J* = 6.0 Hz, 1H), 2.28 (s, 3H), 1.21 (s, 3H), 0.90 (s, 3H); **<sup>13</sup>C NMR (101 MHz, Chloroform-*d*)**  $\delta$  205.39, 172.20, 143.18, 132.27, 129.47, 128.72, 52.03, 40.32, 38.07, 33.00, 32.34, 22.17, 19.95; **IR (cm<sup>-1</sup>)**:  $\nu$  3054, 2951, 1735, 1716, 1660, 1609, 1283, 1109, 1032, 760; **HRMS (ESI)** *m/z* calculated for C<sub>15</sub>H<sub>19</sub>O<sub>3</sub> [M + H]<sup>+</sup>: 247.1334, found: 247.1338.

#### 1-((1R,3R)-2,2-dimethyl-3-phenylcyclopropyl)-2,2-dimethylpropan-1-one (**4r**)

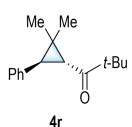

Compound **4r** was synthesized through general procedure G and purified by column chromatography on silica gel (PE/EA = 50 : 1), as a pale oil (38.0 mg, 94%). **<sup>1</sup>H NMR (400 MHz, Chloroform-*d*)**  $\delta$  7.20 (d, *J* = 7.8 Hz, 2H), 7.14 (d, *J* = 7.2 Hz, 1H), 7.07 (d, *J* = 7.4 Hz, 2H), 2.79 (d, *J* = 6.0 Hz, 1H), 2.39 (d, *J* = 6.0 Hz, 1H), 1.16 (s, 9H), 1.12 (s, 3H), 0.91 (s, 3H); **<sup>13</sup>C NMR (101 MHz, Chloroform-*d*)**  $\delta$  212.22, 138.14, 128.87, 128.12, 126.28, 44.05, 37.39, 35.85, 26.30, 26.14, 22.07, 20.02; **IR (cm<sup>-1</sup>)**:  $\nu$  3027, 2967, 1685, 1610, 1477, 1365, 1328, 1076, 764; **HRMS (ESI)** *m/z* calculated for C<sub>16</sub>H<sub>23</sub>O [M + H]<sup>+</sup>: 203.1436, found: 203.1439.

#### 2,2-dimethylspiro[cyclopropane-1,9'-fluorene]-3-carbaldehyde (**4s**)<sup>[31]</sup>

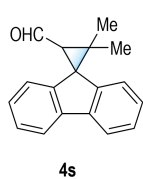

Compound **4s** was synthesized through general procedure G and purified by column chromatography on silica gel (PE/EA = 50 : 1), as a pale oil (19.0 mg, 59%). **<sup>1</sup>H NMR (400 MHz, Chloroform-*d*)**  $\delta$  10.01 (d, *J* = 5.6 Hz, 1H), 7.73 (dd, *J* = 14.4, 7.5 Hz, 2H), 7.52 (d, *J* = 8.0 Hz, 1H), 7.28 (q, *J* = 7.0 Hz, 2H), 7.22 – 7.10 (m, 4H), 2.74 (d, *J* = 5.6 Hz, 1H), 1.70 (s, 3H), 1.45 (s, 3H).

## 10.7 Characterization data for products of synthetic transformations

#### 3-methyl-4-(2-methylprop-1-en-1-yl)-1H-isochromen-1-one (**5**)

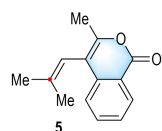

Compound **5** was synthesized through general procedure G and purified by column chromatography on silica gel (PE/EA = 60 : 1), as a yellow oil (38.5 mg, 90%). **<sup>1</sup>H NMR (400 MHz, Chloroform-*d*)**  $\delta$  8.24 – 8.13 (m, 1H), 7.62 – 7.53 (m, 1H), 7.40 – 7.30 (m, 2H), 5.87 – 5.82 (m, 1H), 2.16 – 2.09 (d, *J* = 0.8 Hz, 3H), 1.88 (d, *J* = 1.2 Hz, 3H), 1.49 – 1.44 (d, *J* = 0.8 Hz, 3H); **<sup>13</sup>C NMR (101 MHz, Chloroform-*d*)**  $\delta$  161.8, 150.2, 139.5, 137.3, 133.5, 128.4, 126.2, 122.9, 119.0, 115.5, 110.8, 24.2, 18.5, 16.8; **IR (cm<sup>-1</sup>)**:  $\nu$  3066, 2927, 1736, 1376, 1153, 706, 639; **HRMS (ESI)** *m/z* calculated for C<sub>14</sub>H<sub>15</sub>O<sub>2</sub> [M +

H]<sup>+</sup>: 215.1069, found: 215.1073.

### 3-isopropyl-5-methyl-1,4-diphenyl-1H-pyrazole (**3b-1**)

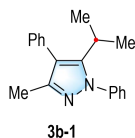

Compound **3b-1** was purified by column chromatography on silica gel (PE/EA = 50 : 1), as a yellow oil (14.3 mg, 52%). <sup>1</sup>H NMR (400 MHz, Chloroform-*d*) δ 7.96 (dd, *J* = 8.8, 1.2 Hz, 2H), 7.44 – 7.36 (m, 4H), 7.31 (dt, *J* = 7.6, 7.2, 1.6 Hz, 3H), 7.21 – 7.17 (m, 1H), 2.80 (p, *J* = 6.8 Hz, 1H), 2.13 (s, 3H), 1.07 (d, *J* = 6.8 Hz, 3H), 1.02 (d, *J* = 6.8 Hz, 3H); <sup>13</sup>C NMR (101 MHz, Chloroform-*d*) δ 159.9, 143.4, 140.4, 137.9, 129.1, 128.8, 128.5, 126.9, 126.1, 125.2, 104.5, 28.0, 22.9, 21.2; IR (cm<sup>-1</sup>): ν 3055, 2923, 1654, 1634, 1377, 1120, 1261, 1016; HRMS (ESI) *m/z* calculated for C<sub>19</sub>H<sub>21</sub>N<sub>2</sub> [M + H]<sup>+</sup>: 277.1705, found: 277.1707.

### 2,2,5-trimethyl-4-phenyl-2,3-dihydrofuran (**3b-2**)

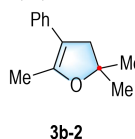

Compound **3b-2** was purified by column chromatography on silica gel (PE/EA = 80 : 1), as a yellow oil (23.4 mg, 82%). <sup>1</sup>H NMR (400 MHz, Chloroform-*d*) δ 7.24 – 7.19 (m, 2H), 7.13 (dd, *J* = 8.4, 1.2 Hz, 2H), 7.06 – 7.00 (m, 1H), 2.74 (q, *J* = 2.0 Hz, 2H), 1.94 (t, *J* = 2.0 Hz, 3H), 1.33 (s, 6H); <sup>13</sup>C NMR (101 MHz, Chloroform-*d*) δ 149.2, 136.6, 128.3, 126.0, 124.8, 107.2, 82.2, 46.5, 28.5, 14.0; IR (cm<sup>-1</sup>): ν 3059, 2932, 1642, 1598, 1580, 1464, 1378, 1244, 1118, 1024, 972, 938, 764, 698; HRMS (ESI) *m/z* calculated for C<sub>13</sub>H<sub>15</sub>O [M + H]<sup>+</sup>: 187.1123, found: 187.1127.

### 2,2-dimethyl-4,5-diphenyl-2,5-dihydrofuran (**3w-2**)

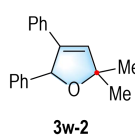

Compound **3w-2** was purified by column chromatography on silica gel (PE/EA = 60 : 1), as a yellow oil (16.7 mg, 67%). <sup>1</sup>H NMR (400 MHz, Chloroform-*d*) δ 7.40 – 7.35 (m, 2H), 7.33 – 7.27 (m, 3H), 7.20 (d, *J* = 6.4 Hz, 3H), 7.16 (dd, *J* = 6.0, 3.0 Hz, 2H), 6.34 (d, *J* = 2.0 Hz, 1H), 6.14 (d, *J* = 2.0 Hz, 1H), 1.49 (s, 3H), 1.45 (s, 3H); <sup>13</sup>C NMR (101 MHz, Chloroform-*d*) δ 141.2, 138.8, 132.9, 132.2, 128.6, 128.3, 128.2, 128.1, 127.6, 126.6, 87.4, 28.9, 28.4; IR (cm<sup>-1</sup>): ν 3060, 2935, 1646, 1204, 1105, 1072, 937; HRMS (ESI) *m/z* calculated for C<sub>18</sub>H<sub>18</sub>ONa [M + Na]<sup>+</sup>: 273.1254, found: 273.1254.

### 5,5-dimethyl-3-phenylfuran-2(5H)-one (**3o-1**)

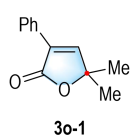

Compound **3o-1** was purified by column chromatography on silica gel (PE/EA = 30 : 1), as a yellow oil (9.1 mg, 66%). <sup>1</sup>H NMR (400 MHz, Chloroform-*d*) δ 7.85 (d, *J* = 8.0 Hz, 2H), 7.50 (s, 1H), 7.40 (q, *J* = 7.6, 6.8 Hz, 3H), 1.56 (s, 6H); <sup>13</sup>C NMR (101 MHz, Chloroform-*d*) δ 170.1, 151.9, 129.0, 128.6, 128.2, 127.6, 126.1, 82.4, 24.7; IR (cm<sup>-1</sup>): ν 3068, 2926, 1755, 1600, 1492, 1463, 1448, 1307, 1244, 1115, 972, 795, 748, 693; HRMS (ESI) *m/z* calculated for C<sub>12</sub>H<sub>13</sub>O<sub>2</sub> [M + H]<sup>+</sup>: 189.0916, found: 189.0920.

## 10.8 Characterization data for products of control experiments

### (*Z*)-3,6-diphenyl-2-(propan-2-ylidene)hex-3-enal (**7**)

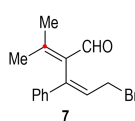

Compound **7** was purified by column chromatography on silica gel (PE/EA = 50 : 1), as a yellow oil (15.0 mg, 52%). <sup>1</sup>H NMR (400 MHz, Chloroform-*d*) δ 10.15 (s, 1H), 7.28 (s, 2H), 7.25 (s, 2H), 7.23 (d, *J* = 2.4 Hz, 2H), 7.18 (d, *J* = 7.2 Hz, 4H), 6.22 (t, *J* = 7.2 Hz, 1H), 2.73 (q, *J* = 7.2 Hz, 3H), 2.32 (s, 3H), 2.31 – 2.26 (m, 1H),

1.74 (s, 3H);  $^{13}\text{C}$  NMR (101 MHz, Chloroform-*d*)  $\delta$  189.8, 141.8, 140.3, 136.5, 135.7, 130.7, 128.4, 128.4, 127.0, 125.9, 125.7, 35.4, 32.0, 24.5, 19.5;  $^{135}\text{DEPT}$  NMR (101 MHz, Chloroform-*d*)  $\delta$  130.7, 128.4, 128.4, 127.0, 125.9, 125.7, 35.4, 32.0, 24.5, 19.5; IR ( $\text{cm}^{-1}$ ):  $\nu$  3049, 2921, 2849, 2801, 2721, 1707 1645, 1467, 1377, 1097, 757, 700; HRMS (ESI)  $m/z$  calculated for  $\text{C}_{21}\text{H}_{23}\text{O}$   $[\text{M} + \text{H}]^+$ : 291.1747, found: 297.1737.

phenyl((2R,3R)-3-phenyl-1,2,3,4-tetrahydronaphthalen-2-yl)methanone (**8**)<sup>[32]</sup>

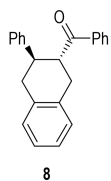

Compound **8** was purified by column chromatography on silica gel (PE/EA = 50 : 1), as a yellow oil (15.0 mg, 59%).  $^1\text{H}$  NMR (400 MHz, Chloroform-*d*)  $\delta$  7.83 (d,  $J$  = 7.4 Hz, 2H), 7.50 (t,  $J$  = 7.4 Hz, 1H), 7.38 (t,  $J$  = 7.8 Hz, 2H), 7.24 - 7.07 (m, 9H), 4.17 (q,  $J$  = 8.2 Hz, 1H), 3.52 (td,  $J$  = 10.8, 6.0 Hz, 1H), 3.24 - 3.07 (m, 4H).  $^{13}\text{C}$  NMR (101 MHz, Chloroform-*d*)  $\delta$  202.80 , 135.94 , 132.92 , 128.63 , 128.52 , 128.47 , 128.44 , 128.07 , 127.38 , 126.41 , 126.21 , 126.03 , 47.34 , 43.09 , 37.82 , 34.46.

## 11. Proposed Mechanism

### 11.1 Proposed Mechanism for the Formation of 7

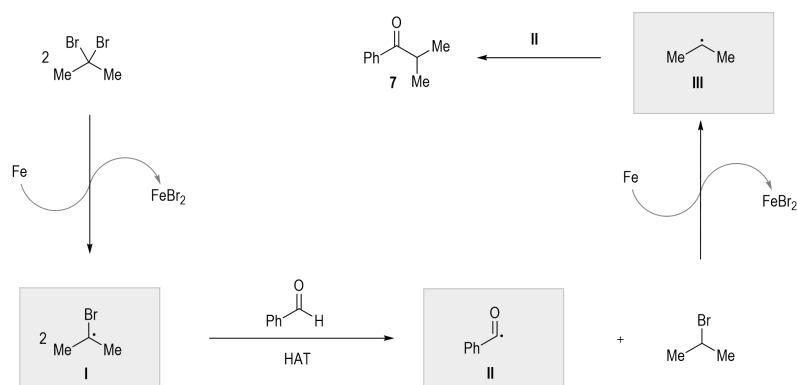

**Figure S1. Proposed mechanism.** 2-bromo-isopropyl radical **I** should be generated in the presence of iron and it subsequently abstracted an H atom from benzaldehyde to yield an acyl radical **II** and 2-bromopropane. Subsequent iron-promoted sec-propyl radical **III** generation from 2-bromopropane followed by radical-radical coupling with the acyl radical provided the product **7**.

### 11.2 Proposed Mechanism for the Formation of 3b-1

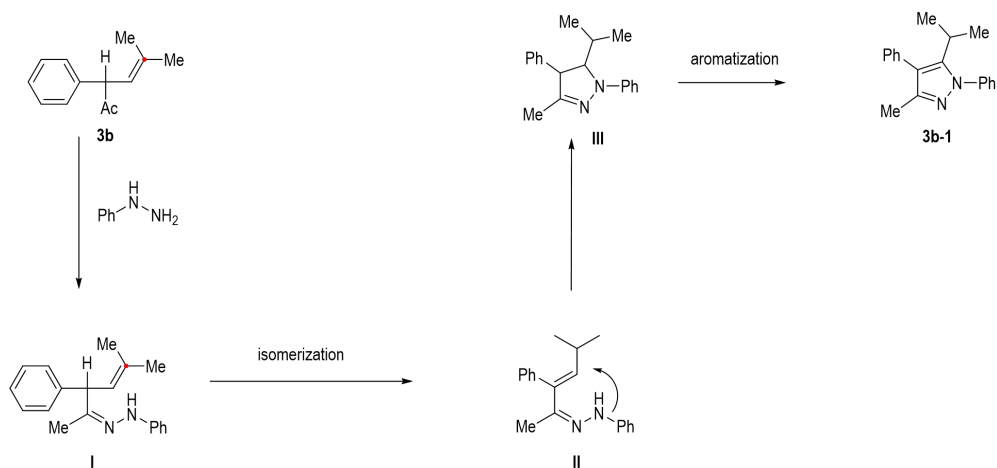

**Figure S2. Proposed mechanism.** After condensation of **3b** with phenylhydrazine to form intermediate I, isomerization occurs under high temperature to yield the thermodynamically more stable intermediate II. Subsequently, an aza-Michael addition reaction takes place to form III, which then undergoes aromatization to give product **3b-1**.

### 11.3 Proposed Mechanism for the Formation of **8**

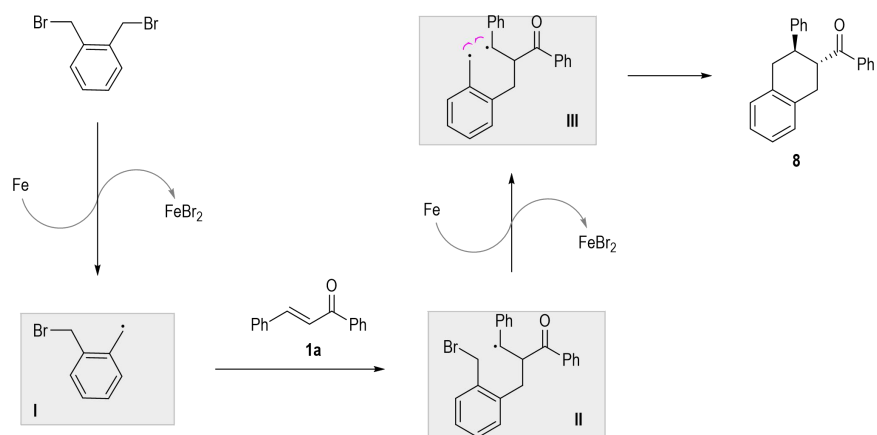

**Figure S3. Proposed mechanism.** After the formation of the benzyl radical, it undergoes addition to the  $\alpha$ -position of chalcone. when another radical was formed by homolytic cleavage of the C-Br bond, two radicals were directly coupling to generate the product **8**.

## 12. References

- [1] D. Dotta, M. Gastaldi, A. Fin, N. Barbero, C. Barolo, F. Cardano, F. Rossi, F. Brunelli, G. Viscardi, G. C. Tron, P. Quagliotto, *J. Org. Chem.* **2025**, *90*, 2915–2926.
- [2] M. Aginagalde, T. Bello, C. Masdeu, Y. Vara, A. Arrieta, F. P. Cossio, *J. Org. Chem.* **2010**, *75*, 7435–7438.
- [3] Z. Kong, D. Sun, Y. Jiang, Y. Hu, *J. Enzyme Inhib Med. Chem.* **2020**, *35*, 1513–1523.
- [4] A.-L. N. t. C. Mélissa, C. Mahama, C. Souleymane, O. L. Hyacinthe, S. Kra, G. Prisca, F. Bamba, K. A. B. Benjamin, C. Logé, J.-M. Robert, *Chem. Sci. Int. J.* **2024**, *33*, 145–154.
- [5] P.-H. Li, H. Jiang, W.-J. Zhang, Y.-L. Li, M.-C. Zhao, W. Zhou, L.-Y. Zhang, Y.-D. Tang, C.-Z. Dong, Z.-S. Huang, H.-X. Chen, Z.-Y. Du, *Eur. J. Med. Chem.* **2018**, *145*, 498–510.
- [6] A. Sadeer, T. Kojima, J. S. Ng, K. Gan, R. J. Chew, Y. Li, S. A. Pullarkat, *Tetra. Lett.* **2020**, *76*, 131259.
- [7] N. Li, Q. Fan, L. Xu, R. Ma, S. Xu, J. Qiao, X. Xu, R. Guo, K. Yun, *Mol. Catal.* **2021**, *511*, 111727.
- [8] J. R. Zoeller, C. E. Sumner, *J. Org. Chem.* **1990**, *55*, 319–324.
- [9] A. Rahmatpour, N. Goodarzi, *Catal. Commun.* **2019**, *124*, 24–31.
- [10] V. Nair, A. R. Sreekanth, A. U. Vinod, *Org. Lett.* **2001**, *3*, 3495–3497.
- [11] V. Tomar, Y. Upadhyay, A. K. Srivastava, M. Nemiwal, R. K. Joshi, P. Mathur, *J. Organomet. Chem.* **2021**, *940*, 121752.
- [12] I. Ambrogio, S. Cacchi, G. Fabrizi, A. Goggiamani, S. Sgalla, *Synlett.* **2009**, *4*, 620–624.
- [13] L. Xiao, Y. Zheng, Q. Xie, L. Shao, *Eur. J. Org. Chem.* **2017**, *2017*, 5880–5883.
- [14] S. Biswas, S. C. Pan, *Org. Lett.* **2025**, *27*, 309–314.
- [15] E. Lee-Ruff, F. J. Ablenas, *Chem. Canadian J.* **1989**, *67*, 699–702.
- [16] K. Zhang, D. Rombach, N. Y. Notel, G. Jeschke, D. Katayev, *Angew. Chem. Int. Ed.* **2021**, *60*, 22487–22495.
- [17] Yujiro Hayashi, Yuji Miyamoto, Mitsuru Shoji, *Tetra. Lett.* **2002**, *43*, 4079–4082.
- [18] D.-B. Sung, J. S. Lee, *Org. Lett.* **2023**, *25*, 7110–7114.
- [19] Zhiping Li, Haijun Li, Xingwei Guo, Lin Cao, Rong Yu, Huanrong Li, Shiguang Pan, *Org. Lett.* **2008**, *10*, 803–805.
- [20] J. Werth, K. Berger, C. Uyeda, *Adv. Synth. Catal.* **2020**, *362*, 348–352.
- [21] a) Y. Li, H. Xu, M. Xing, F. Huang, J. Jia, J. Gao, *Org. Lett.* **2015**, *17*, 3690–3693. b) W. Gładkowski, A. Skrobiszewski, M. Mazur, M. Siepka, A. Pawlak, B. Obmińska-Mrukowicz, A. Białońska, D. Poradowski, A. Drynda, M. Urbaniak, *Tetra. Lett.* **2013**, *69*, 10414–10423. c) L. Bagnell, U. Kreher, C. R. Strauss, *Chem. Commun.* **2001**, 29–30. d) X. Zhang, Q. Chen, R. Song, J. Xu, W. Tian, S. Li, Z. Jin, Y. R. Chi, *ACS Catal.* **2020**, *10*, 5475–5482. e) J.-M. Yang, Z.-Q. Li, M.-L. Li, Q. He, S.-F. Zhu, Q.-L. Zhou, *J. Am. Chem. Soc.* **2017**, *139*, 3784–3789.
- [22] J. Chen, J. H. Lin, J. C. Xiao, *Org. Lett.* **2018**, *20*, 3061–3064.
- [23] X. Zhang, J. Kang, P. Niu, J. Wu, W. Yu, J. Chang, *J. Org. Chem.* **2014**, *79*, 10170–10178.
- [24] X. Li, T. Wang, Z. Zhang, *Adv. Synth. Catal.* **2018**, *361*, 696–701.
- [25] X. Li, H. Song, S. Yu, R. Mi, X. X. Li, *Angew. Chem. Int. Ed.* **2023**, *62*, e202305669.
- [26] Y. Horino, M. Murakami, A. Aimono, J. H. Lee, H. Abe, *Org. Lett.* **2019**, *21*, 476–480.

- [27] R. Taylor, M. Edwards, R. Paxton, D. Pugh, *Synlett* **2008**, 2008, 521–524.
- [28] M. E. Jung, U. Karama, R. Marquez, *J. Org. Chem.* **1999**, 64, 663–665.
- [29] J. Eshon, C. R. Landis, J. M. Schomaker, *J. Org. Chem.* **2017**, 82, 9270–9278.
- [30] G.-F. Zha, W.-Y. Fang, J. Leng, H.-L. Qin, *Adv. Synth. Catal.* **2019**, 361, 2262–2267.
- [31] D. Armesto, M. Ortiz, A. Agarrabeitia, and . Martin-Fontecha. *Org. Lett.* **2004**, 6, 2261-2264.
- [32] B.Huang, J.Zou, S.Wang, H.Lu, *Chem. Eur. J.* **2025**, 31, 202404518. <https://doi.org/10.1002/chem.202404518>

### 13. NMR Spectra

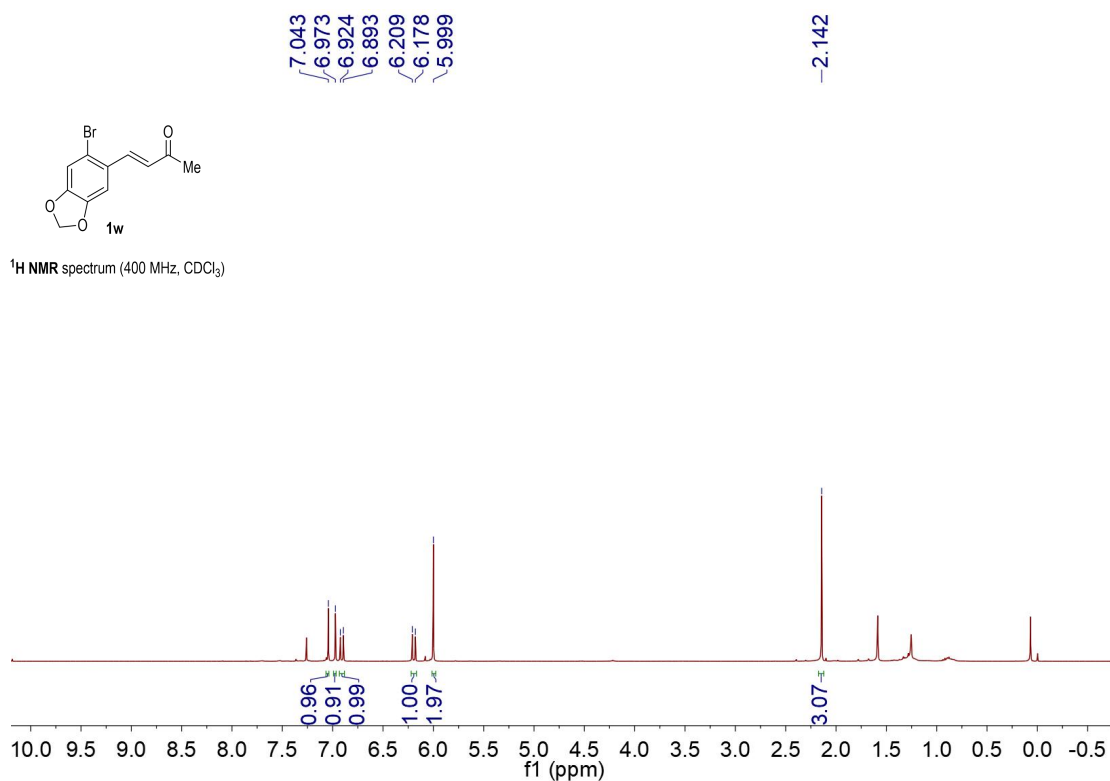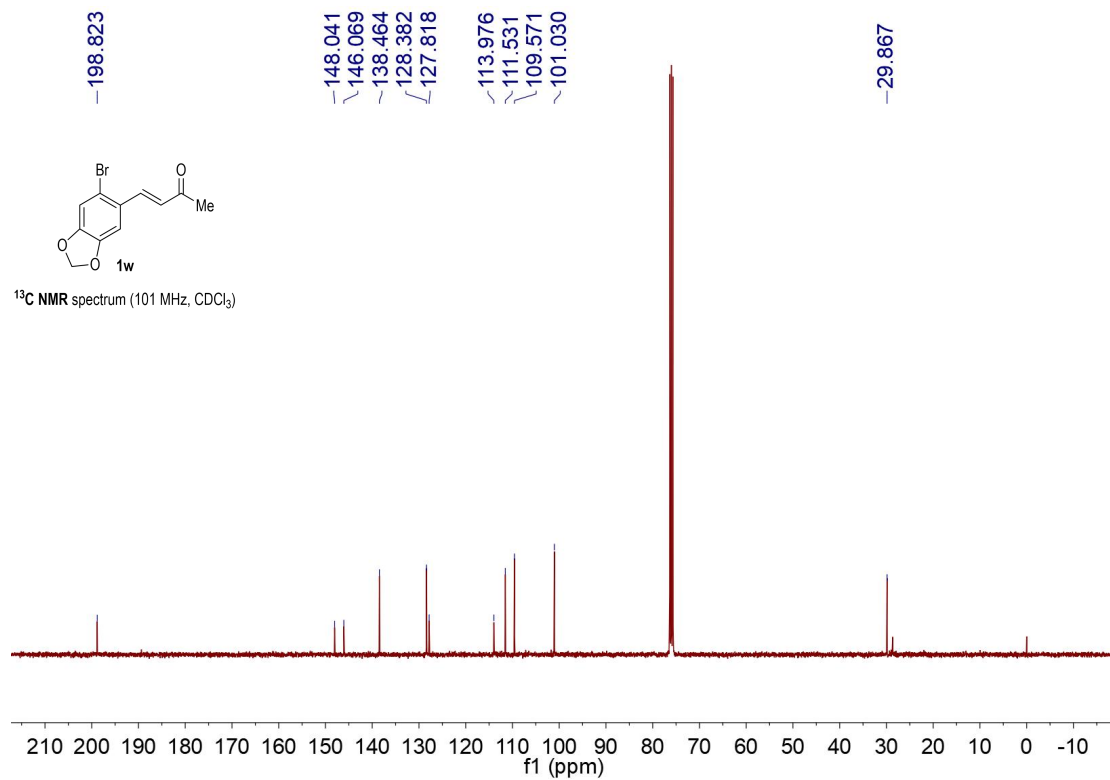

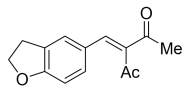

**1ag**

<sup>1</sup>H NMR spectrum (400 MHz, CDCl<sub>3</sub>)

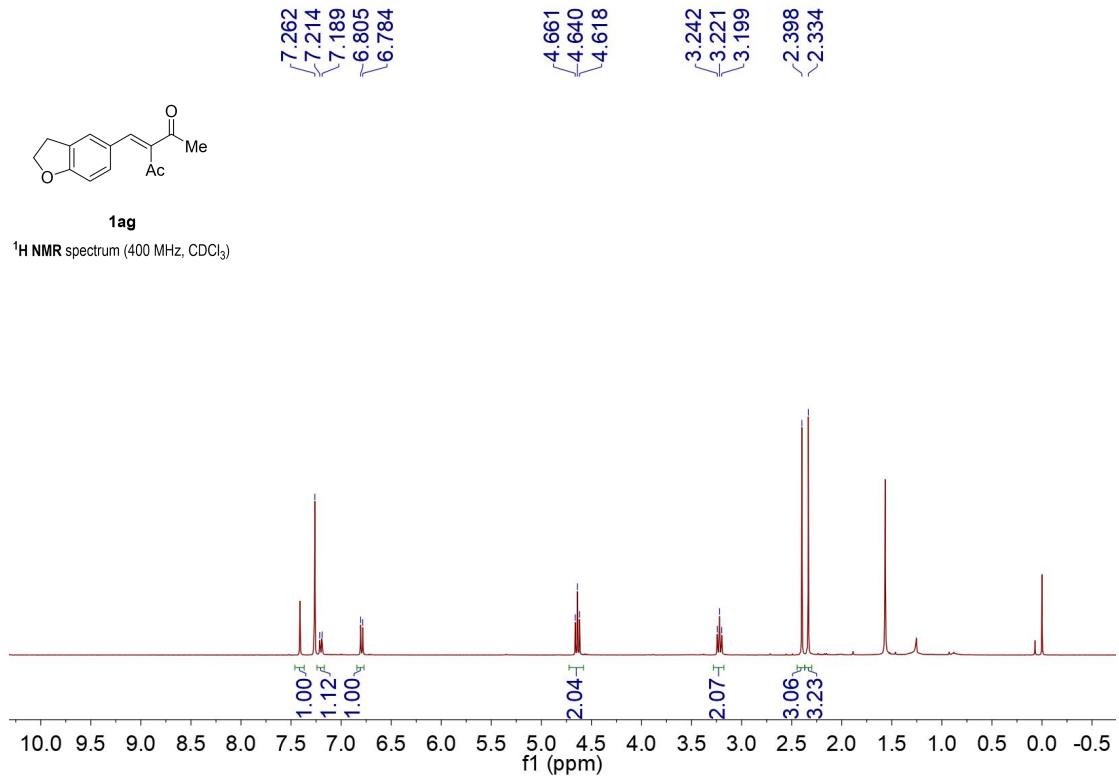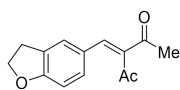

**1ag**

<sup>13</sup>C NMR spectrum (101 MHz, CDCl<sub>3</sub>)

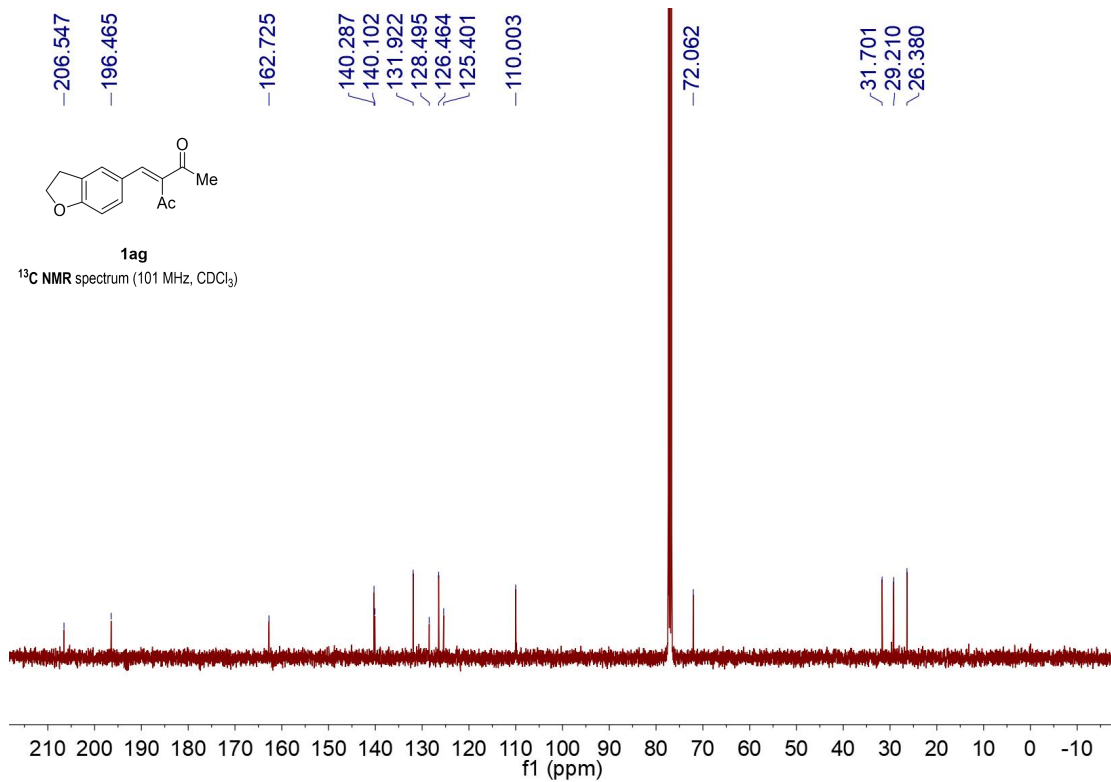

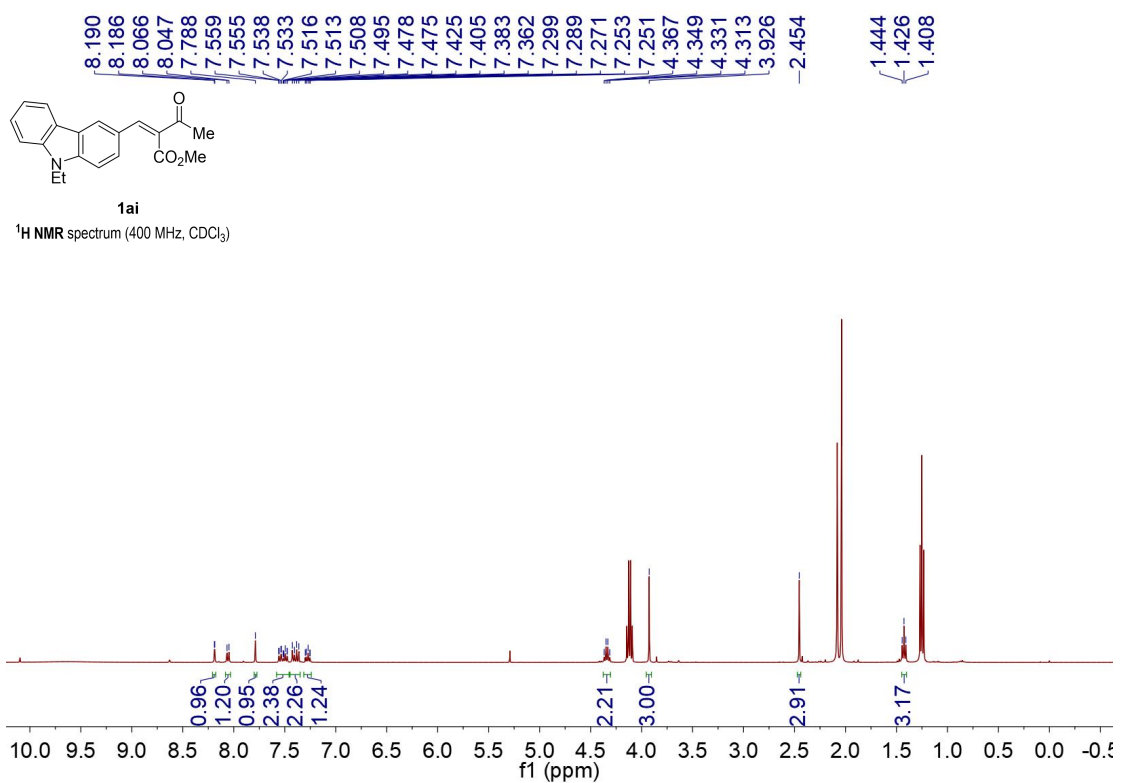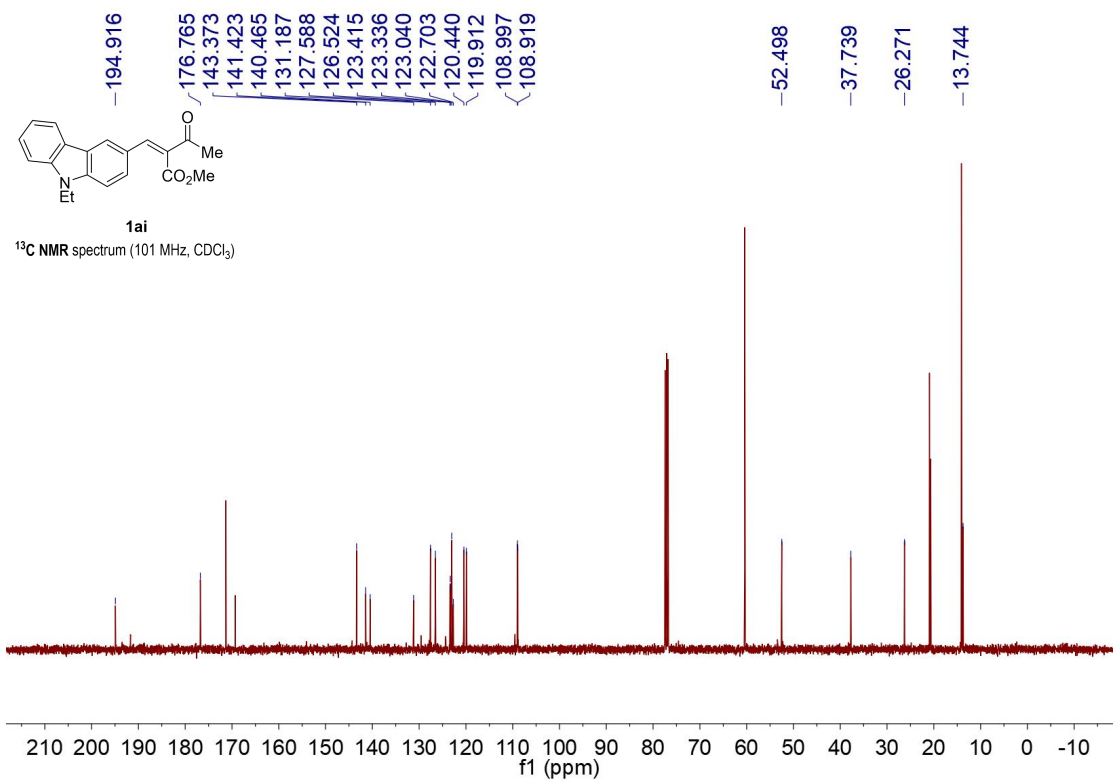

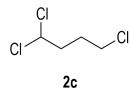

<sup>1</sup>H NMR spectrum (400 MHz, CDCl<sub>3</sub>)

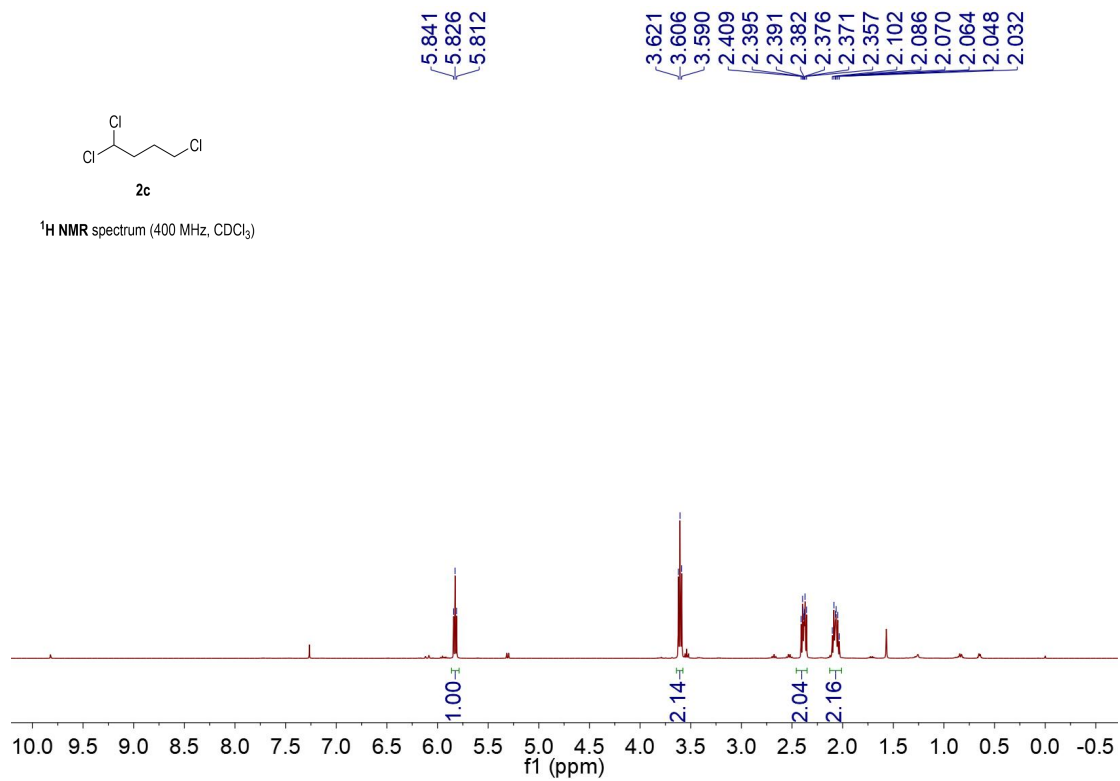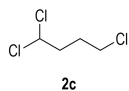

<sup>13</sup>C NMR spectrum (101 MHz, CDCl<sub>3</sub>)

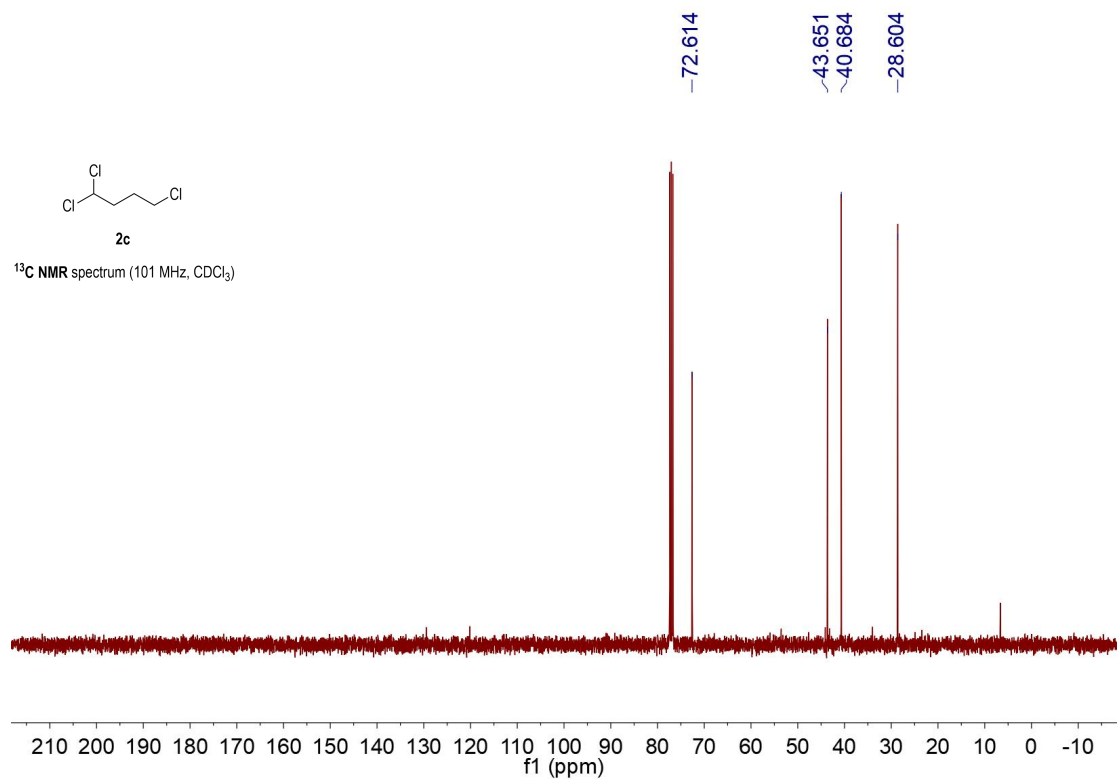

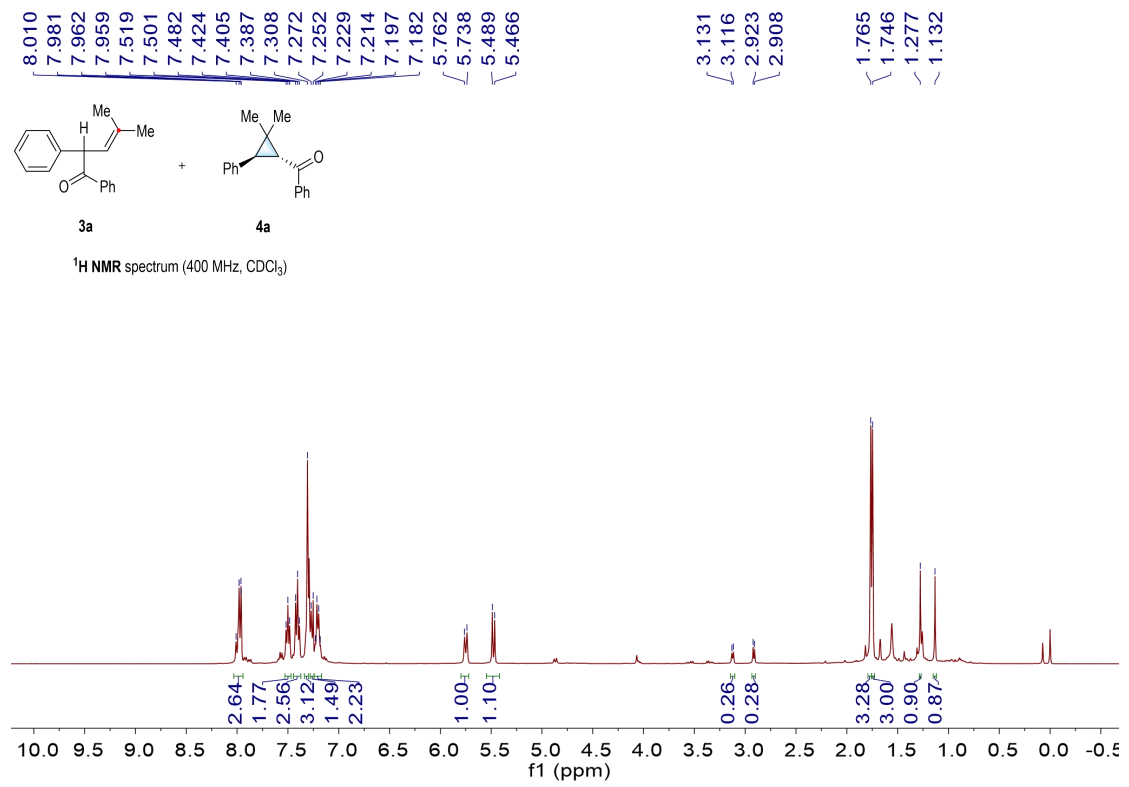

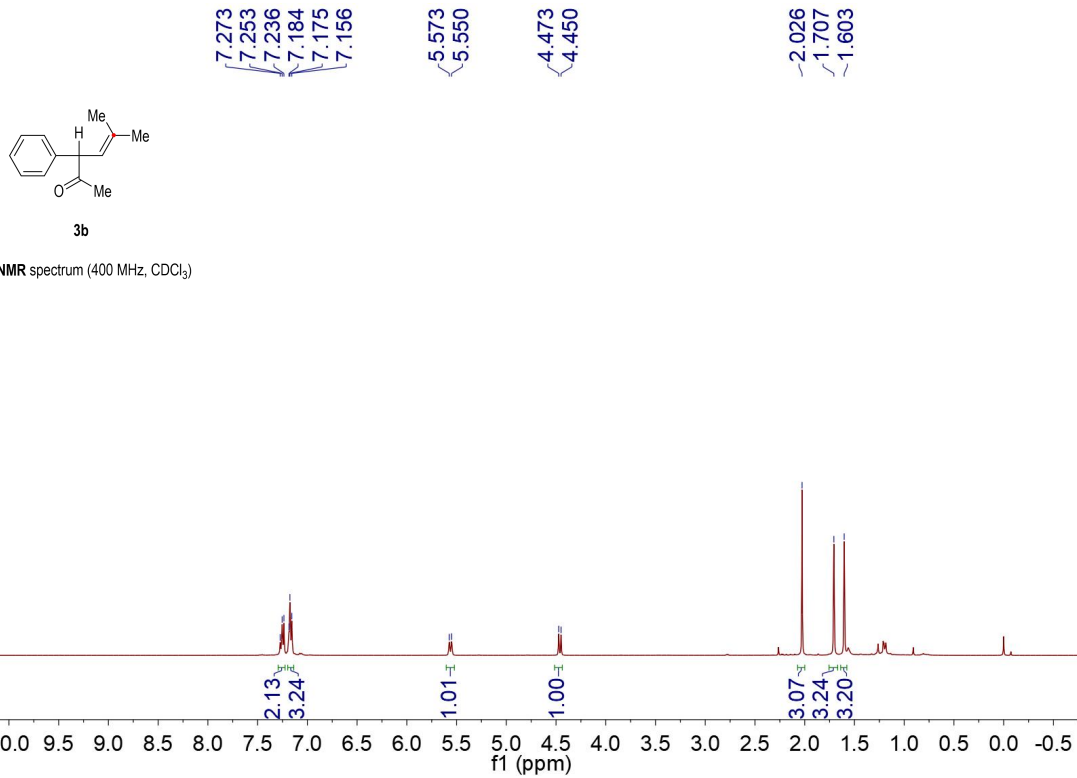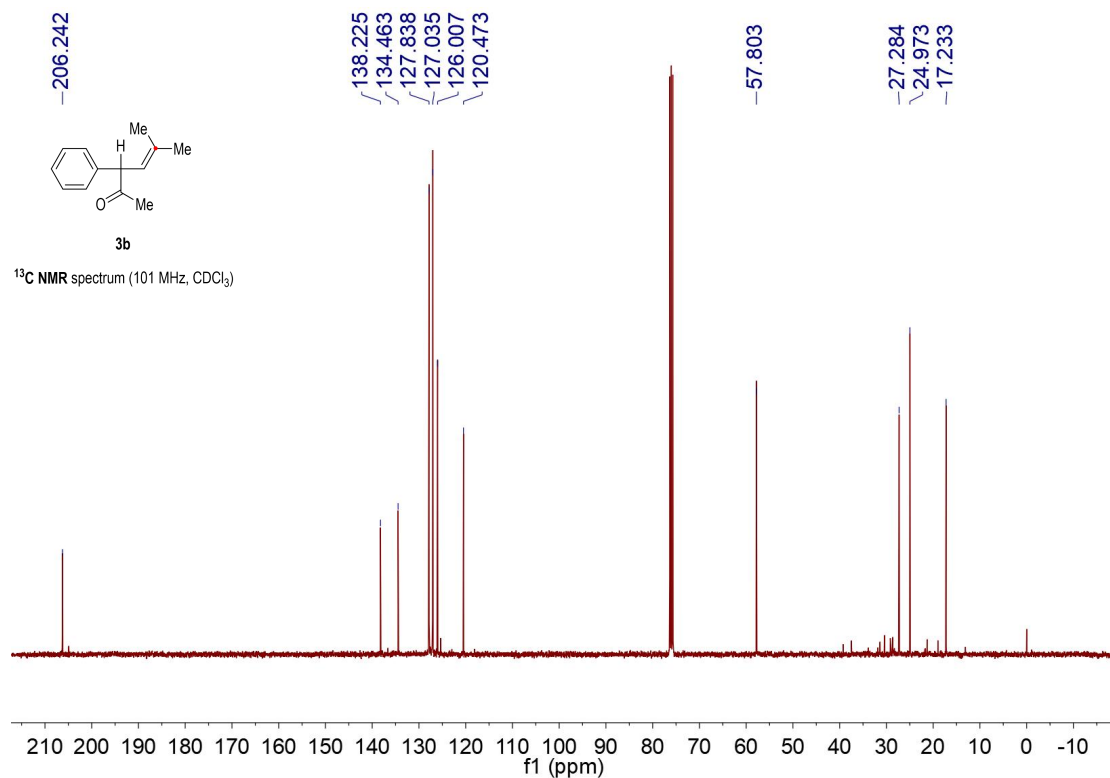

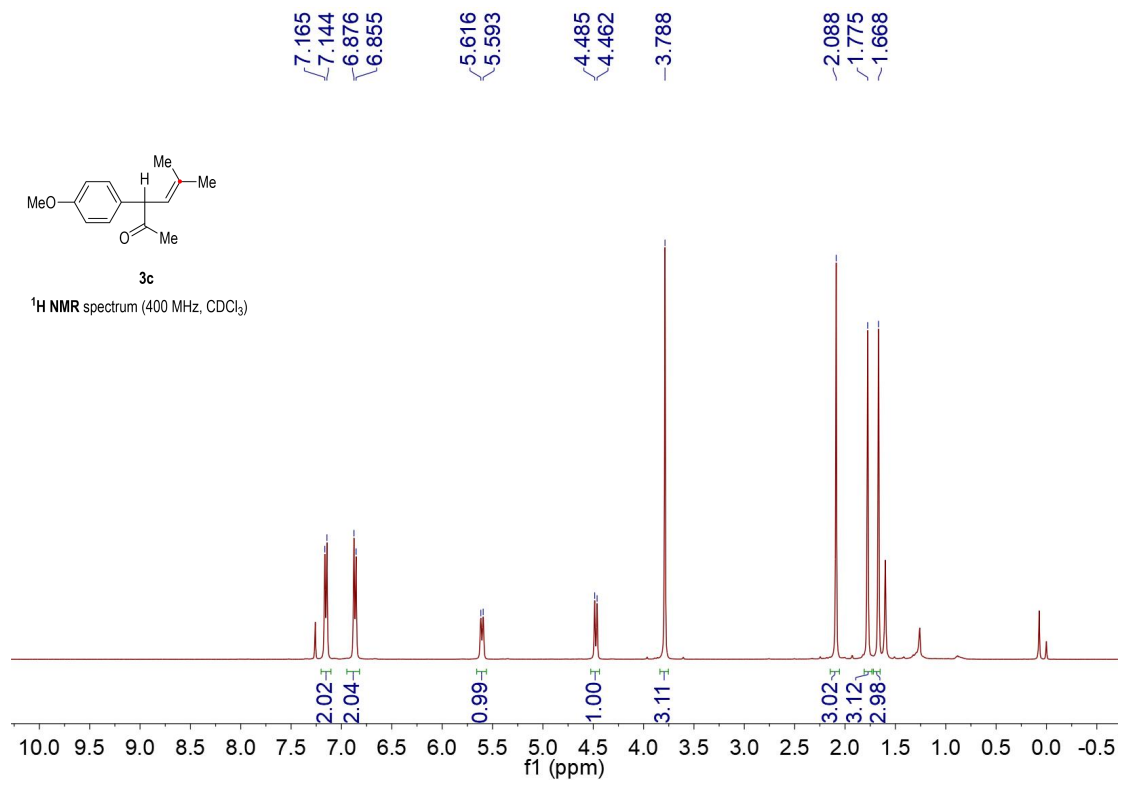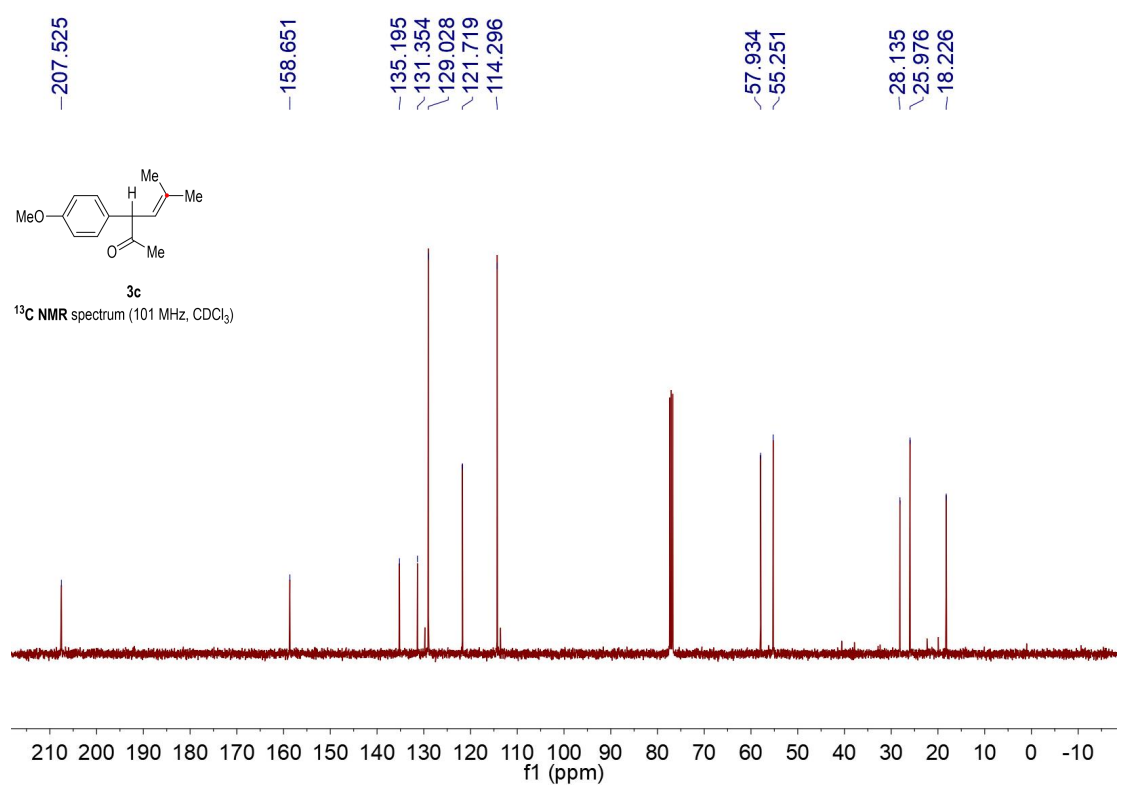

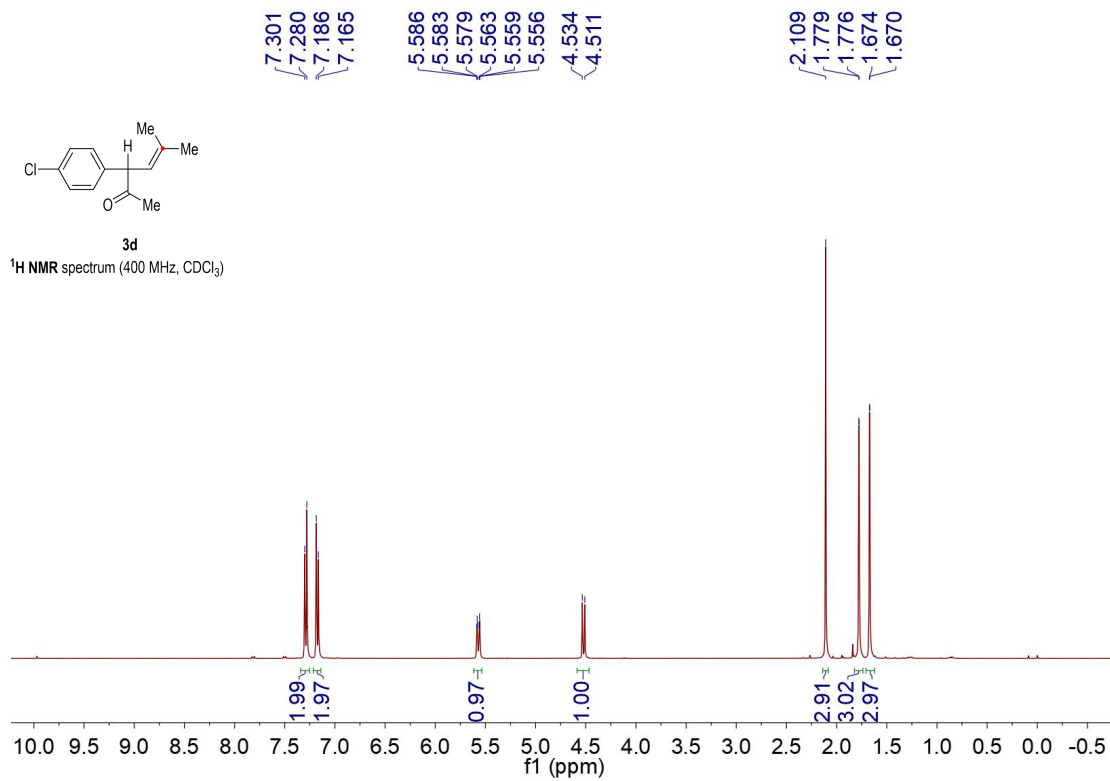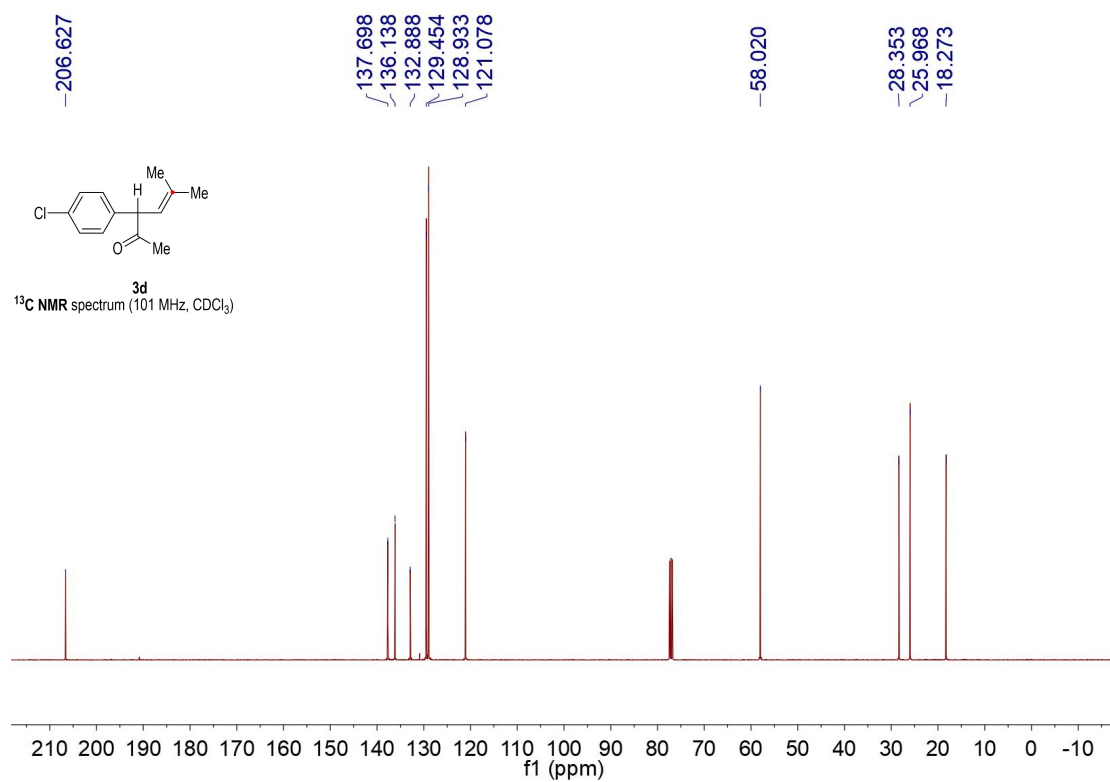

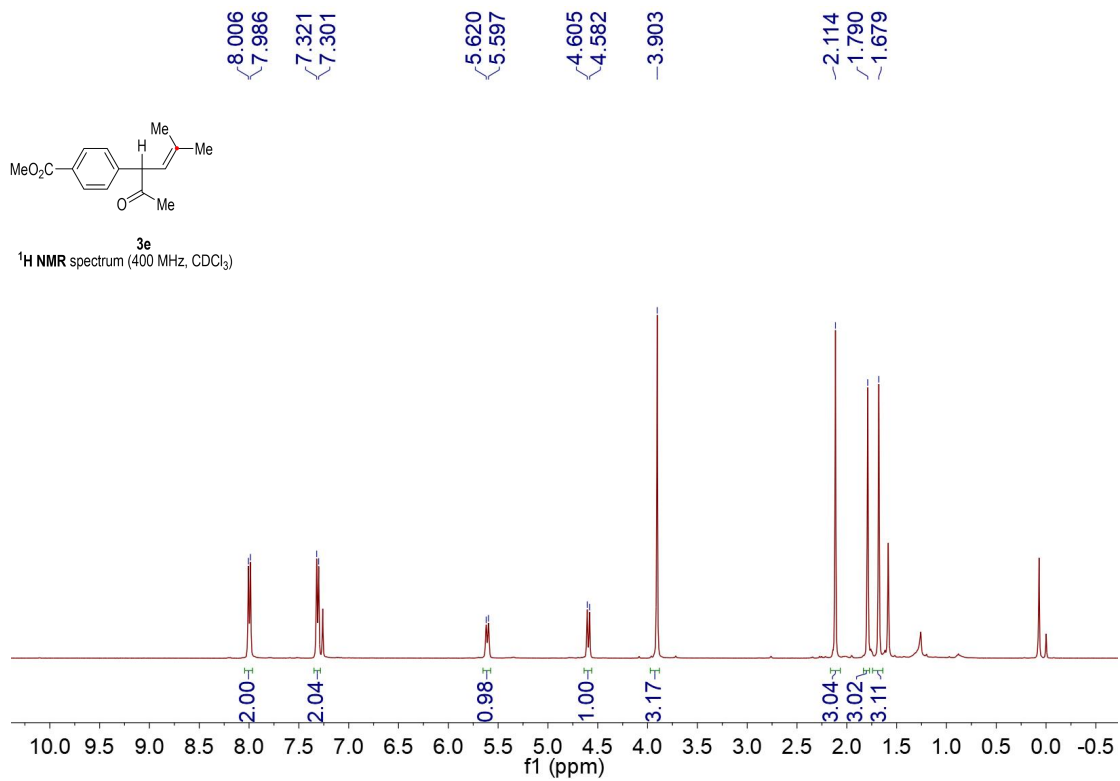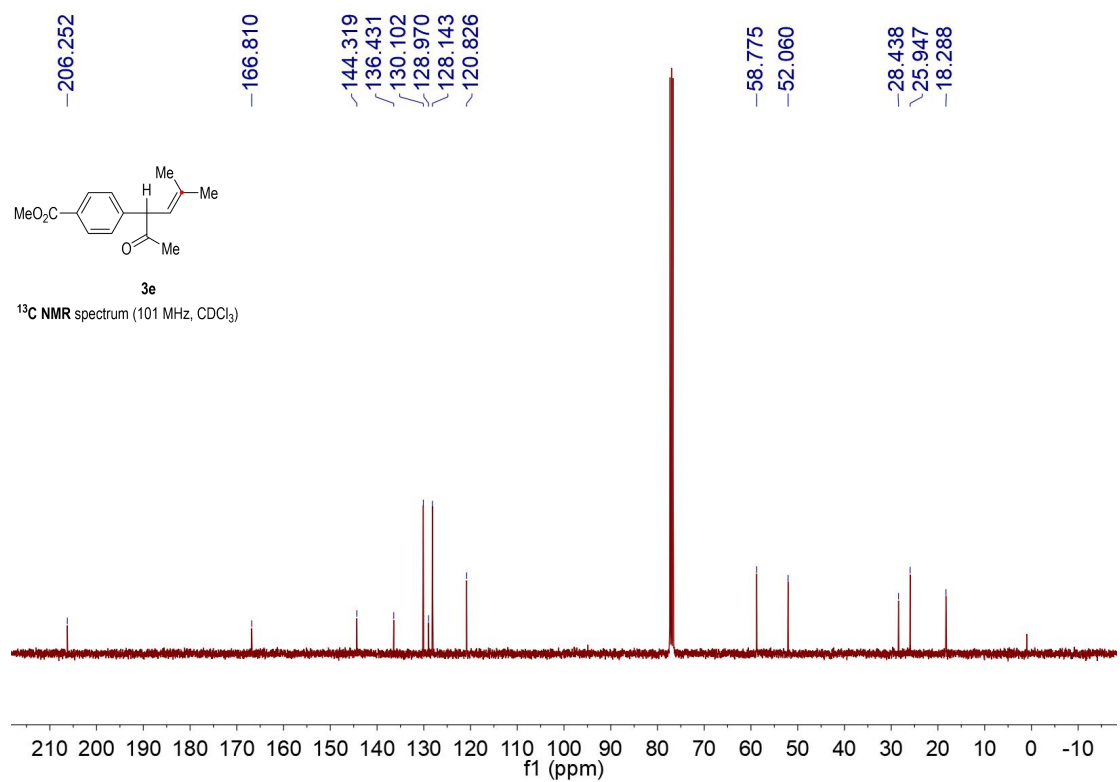

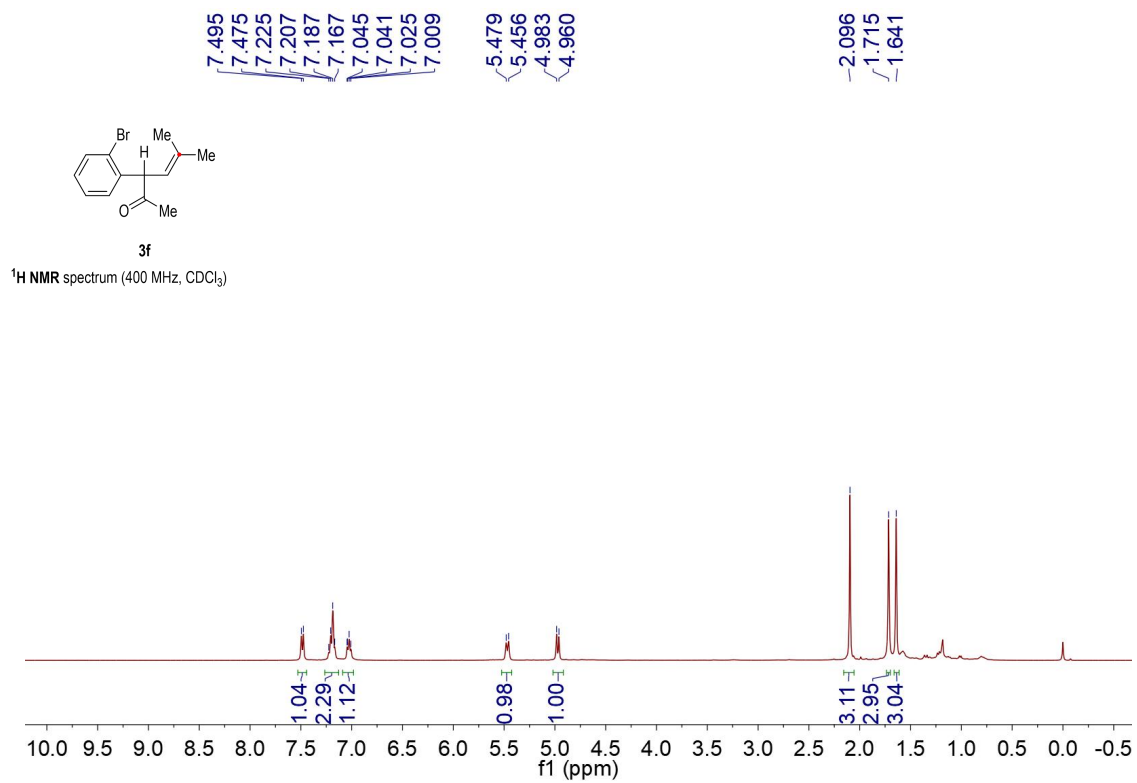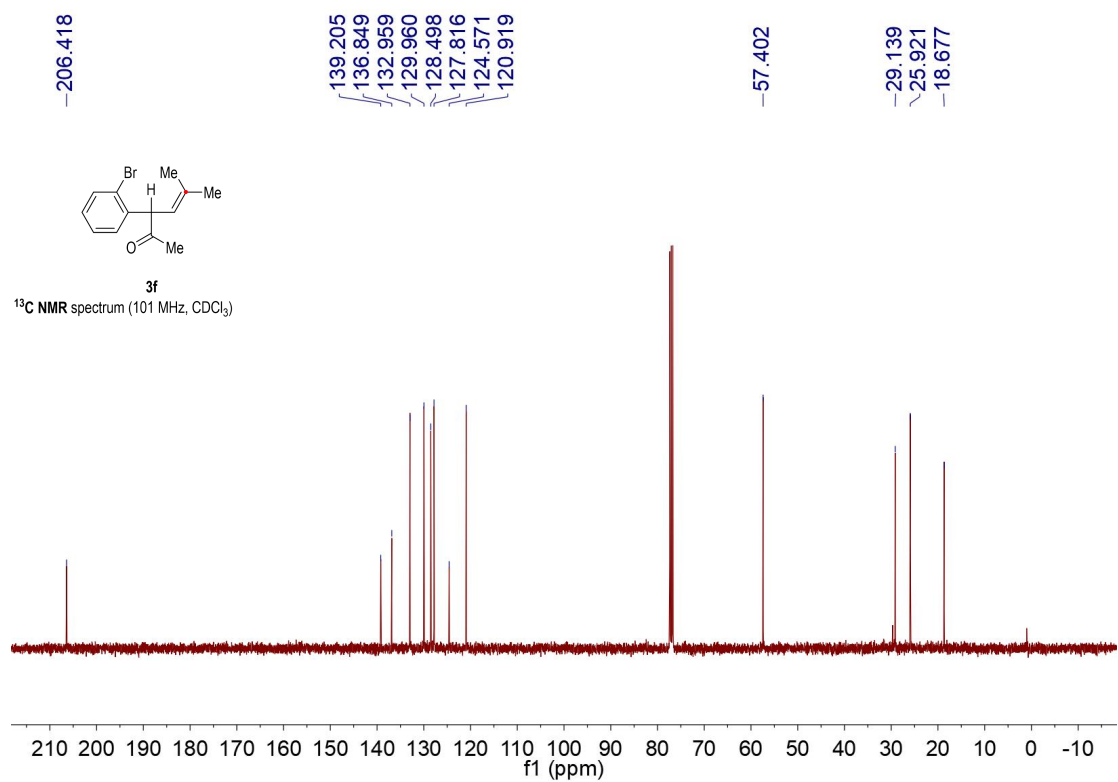

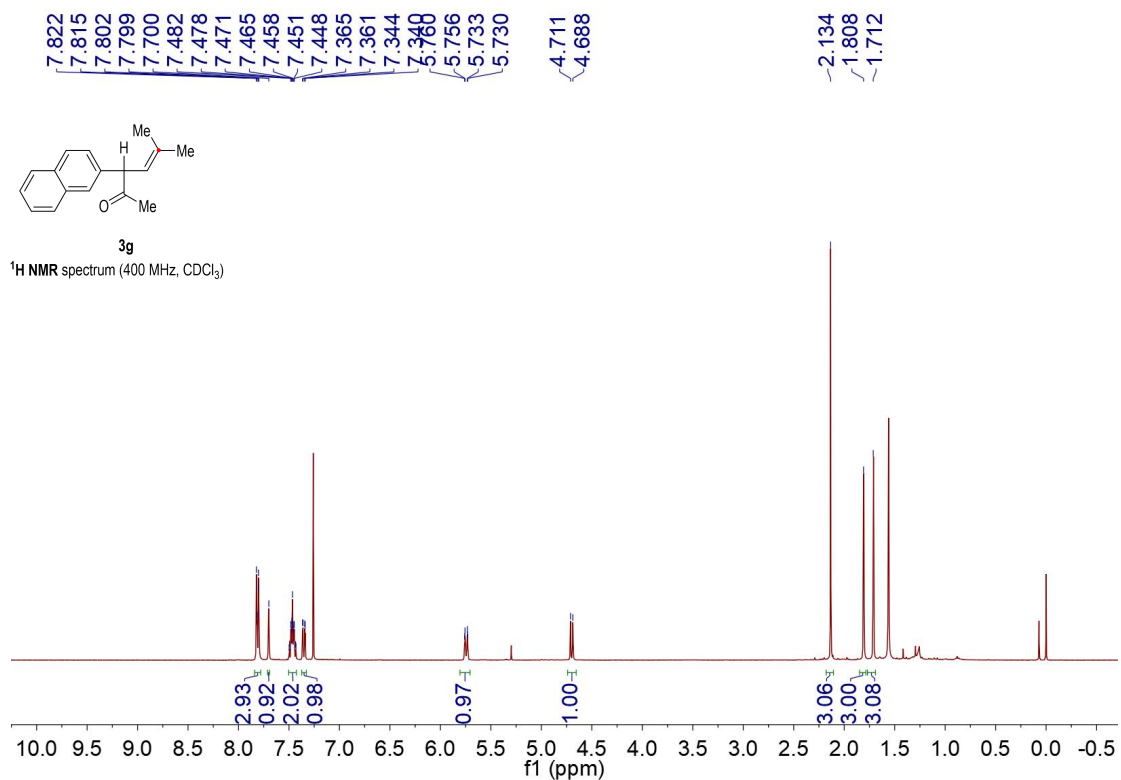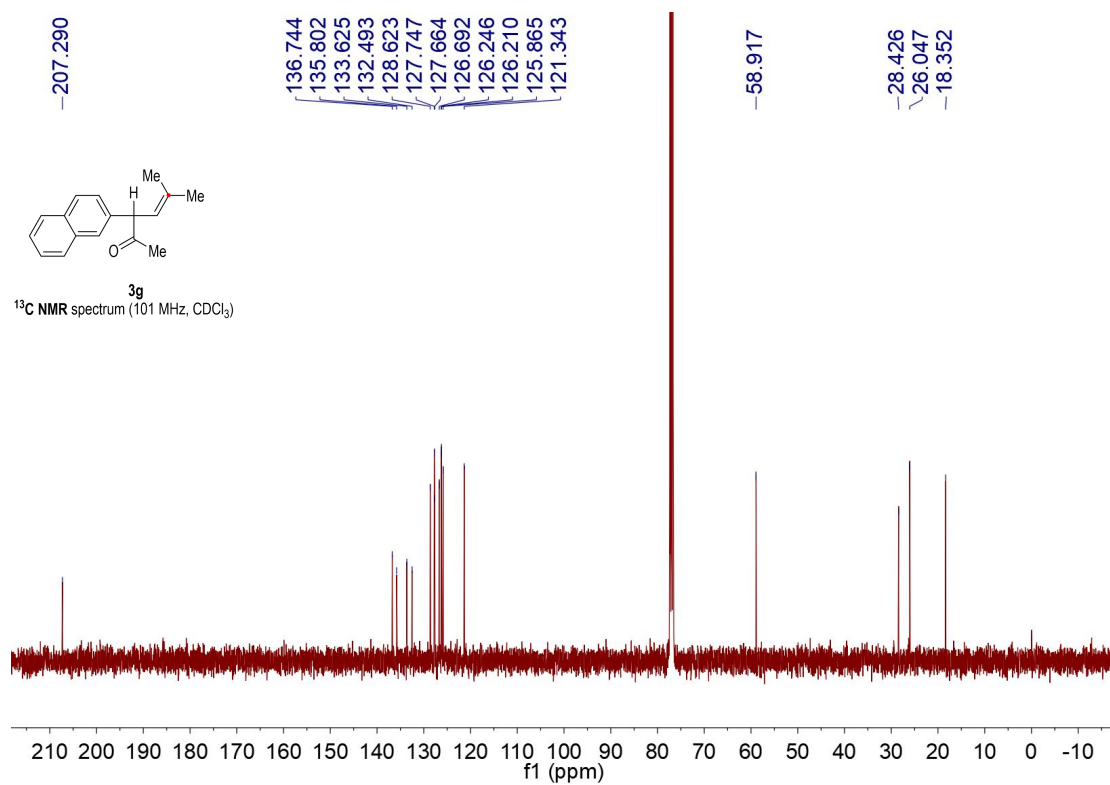

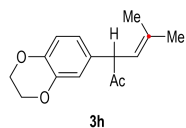

<sup>1</sup>H NMR spectrum (400 MHz, CDCl<sub>3</sub>)

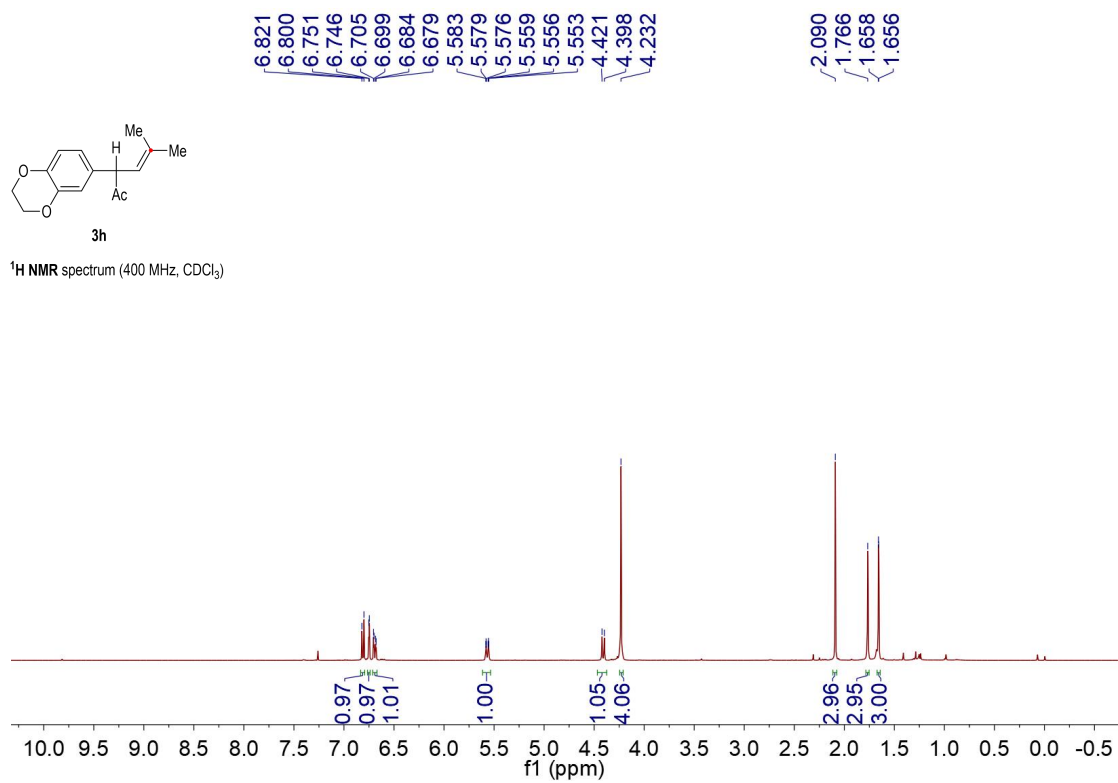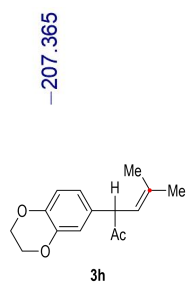

<sup>13</sup>C NMR spectrum (101 MHz, CDCl<sub>3</sub>)

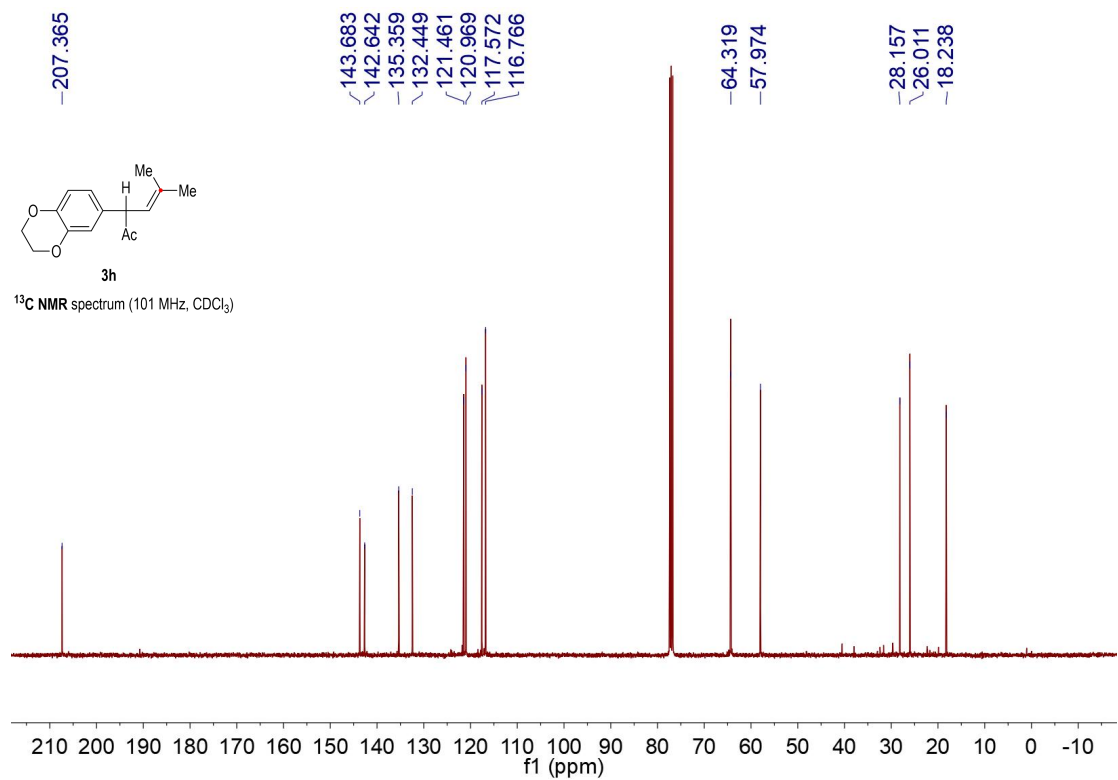

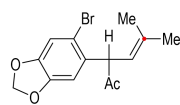

3i

<sup>1</sup>H NMR spectrum (400 MHz, CDCl<sub>3</sub>)

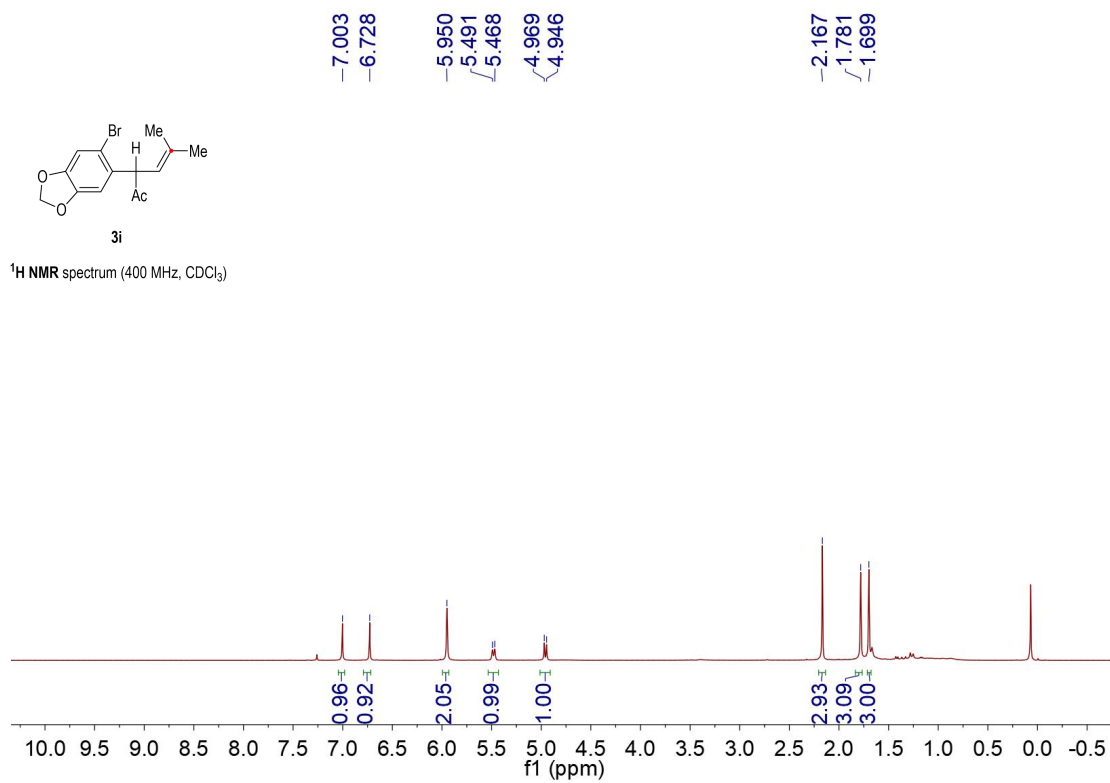

205.748

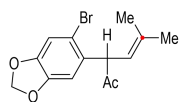

3i

<sup>13</sup>C NMR spectrum (101 MHz, CDCl<sub>3</sub>)

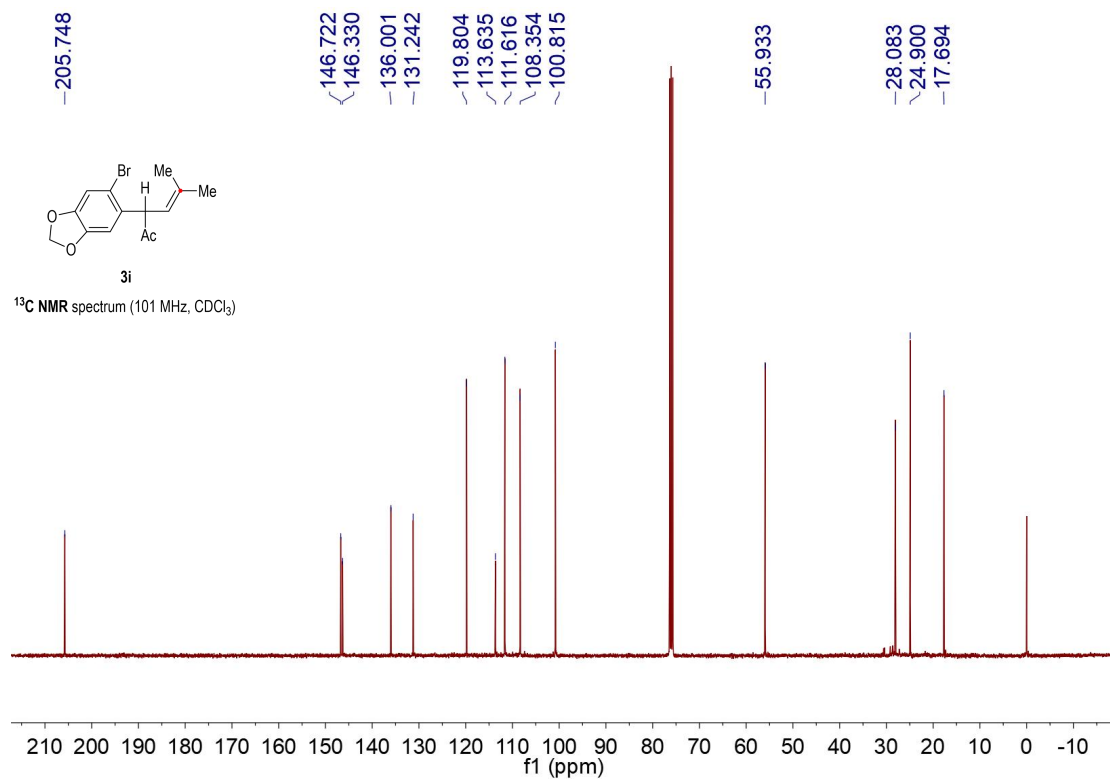

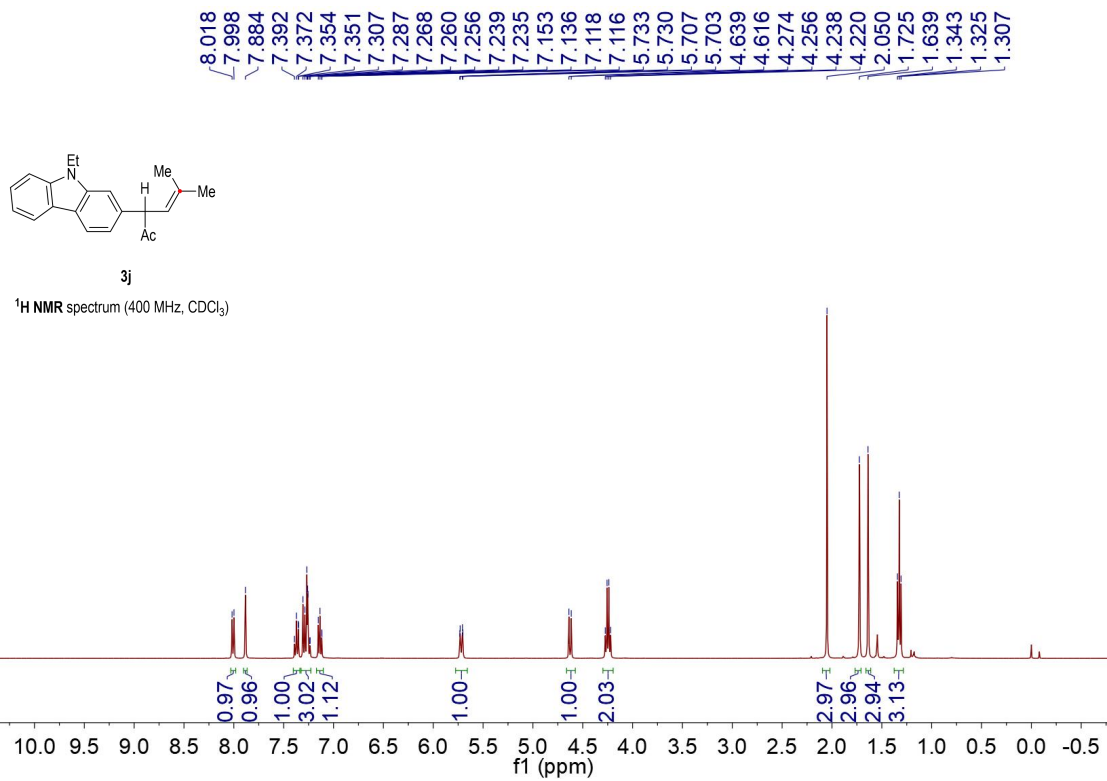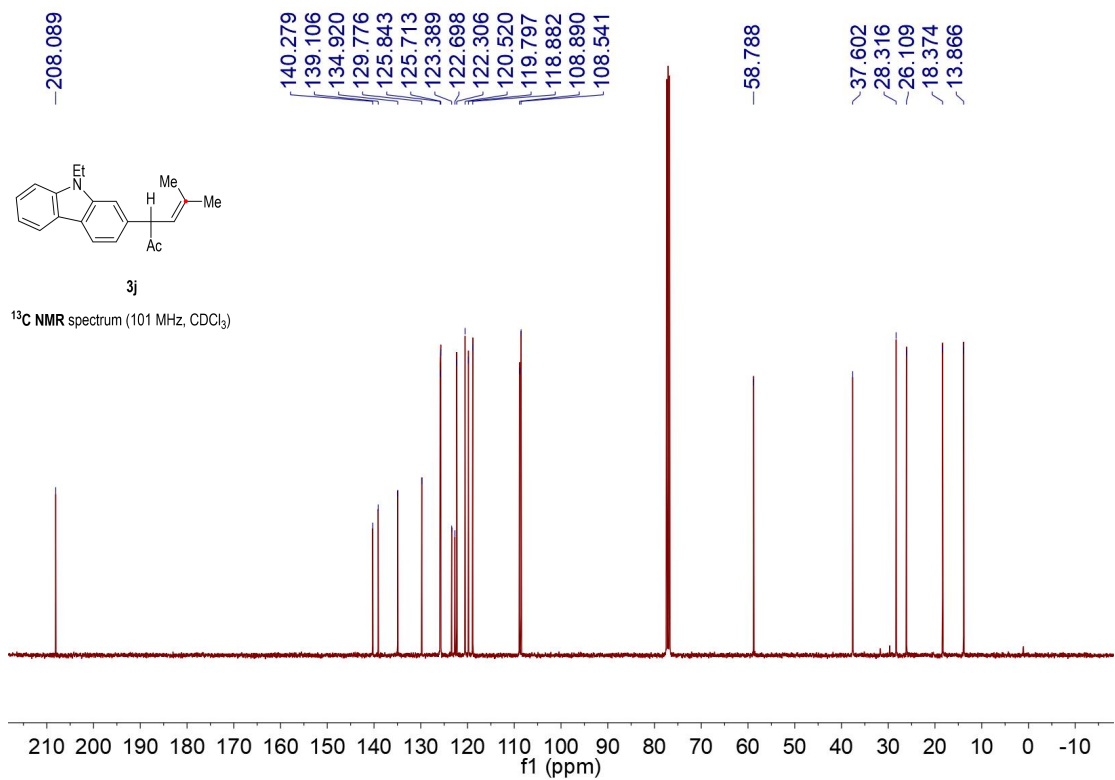

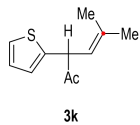

<sup>1</sup>H NMR spectrum (400 MHz, CDCl<sub>3</sub>)

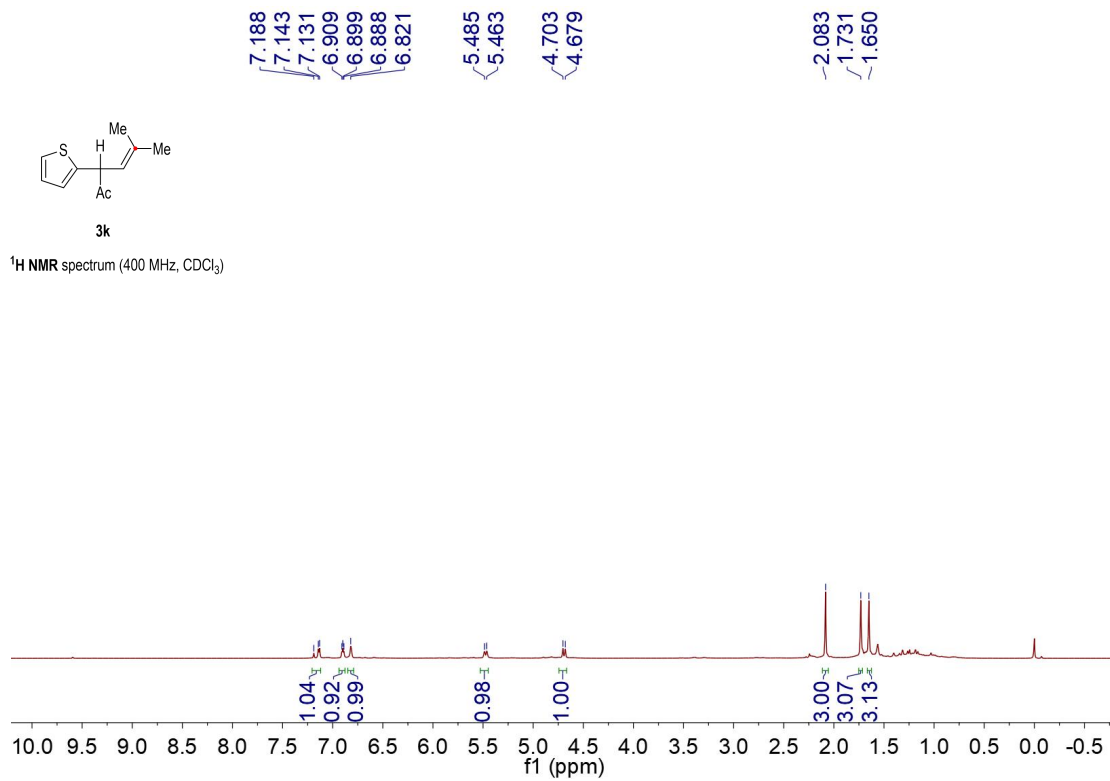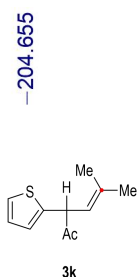

<sup>13</sup>C NMR spectrum (101 MHz, CDCl<sub>3</sub>)

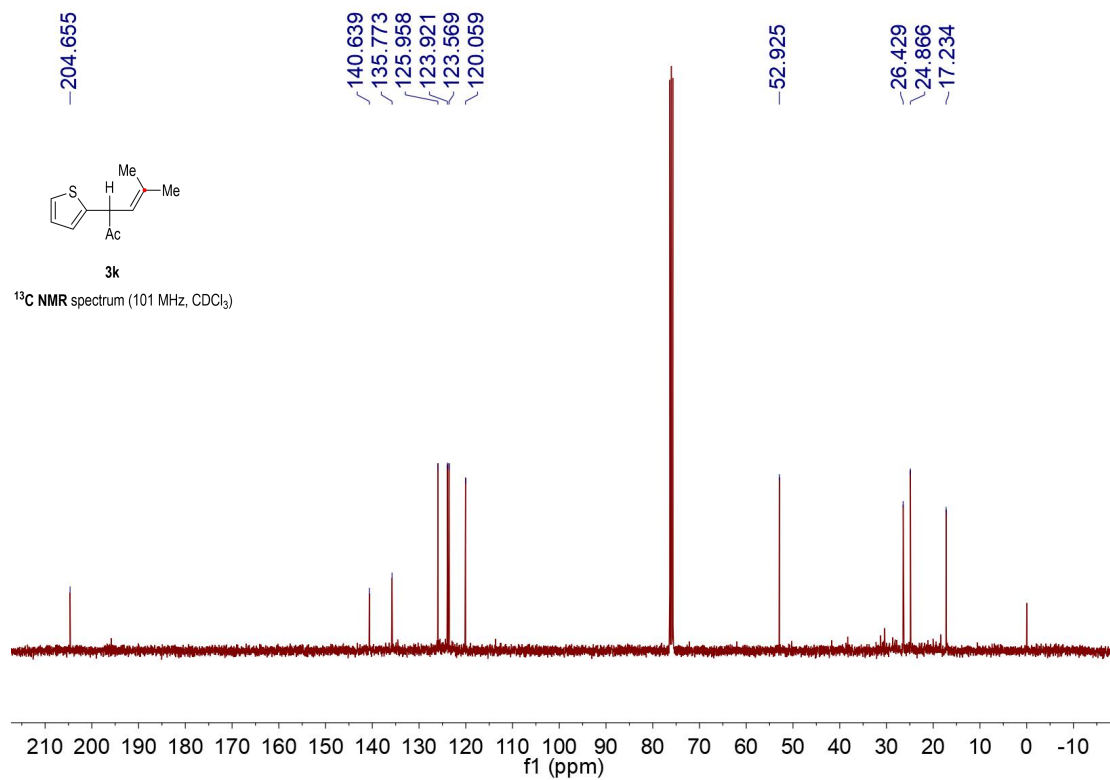

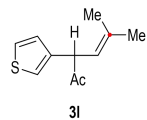

<sup>1</sup>H NMR spectrum (400 MHz, CDCl<sub>3</sub>)

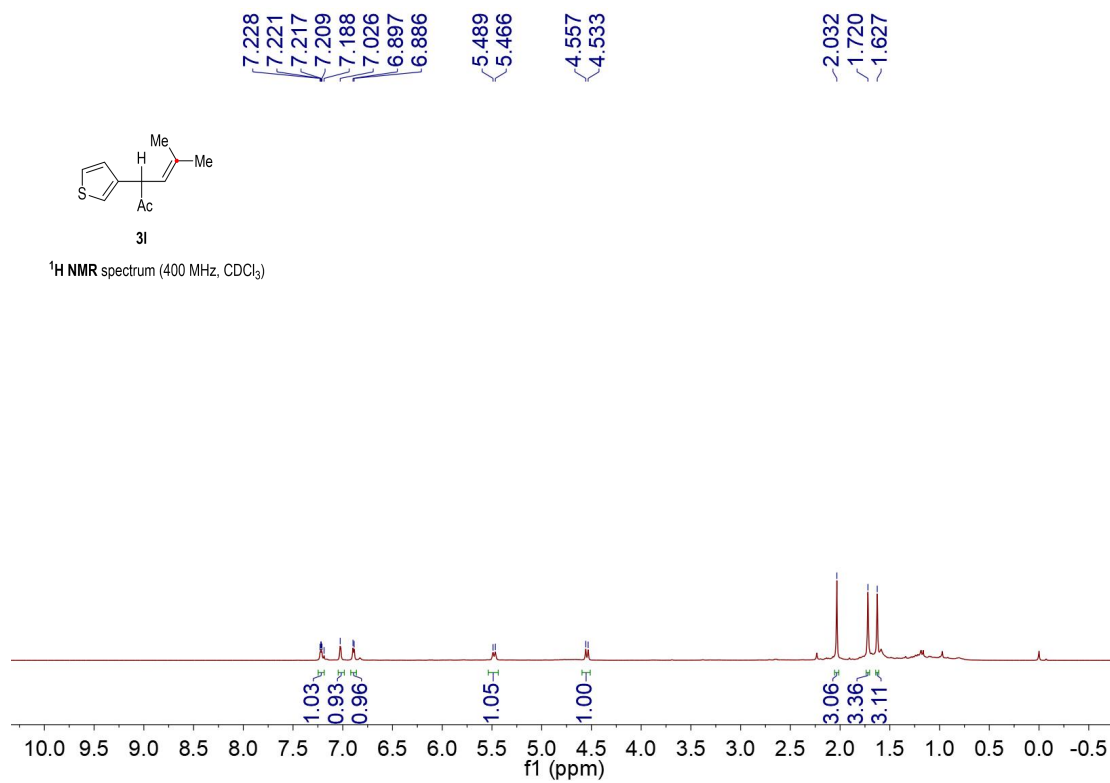

206.716

139.196  
135.973  
127.240  
126.035  
121.546  
120.963

54.536

27.776  
25.932  
18.202

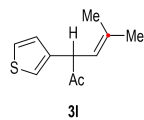

<sup>13</sup>C NMR spectrum (101 MHz, CDCl<sub>3</sub>)

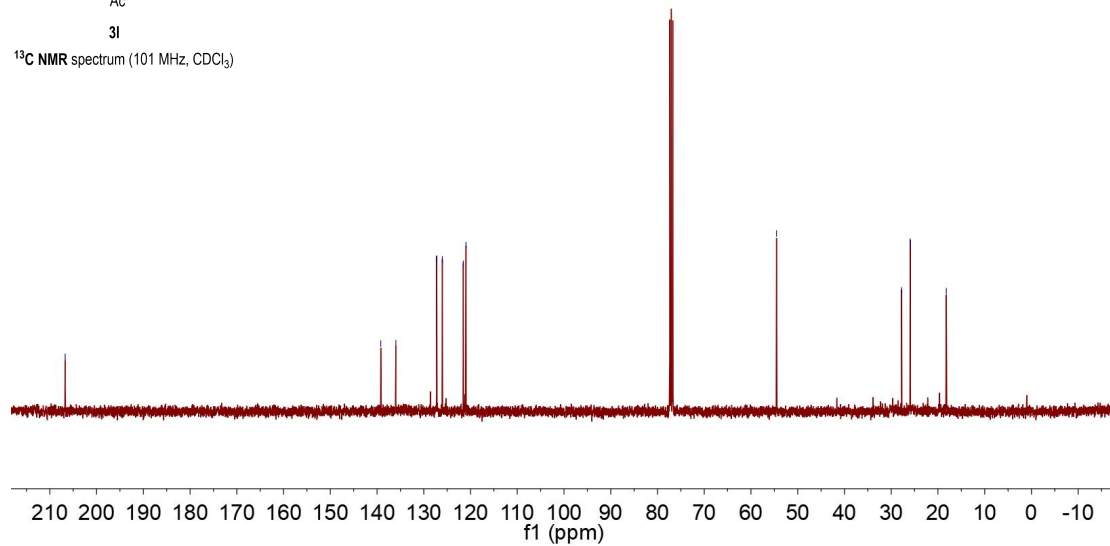

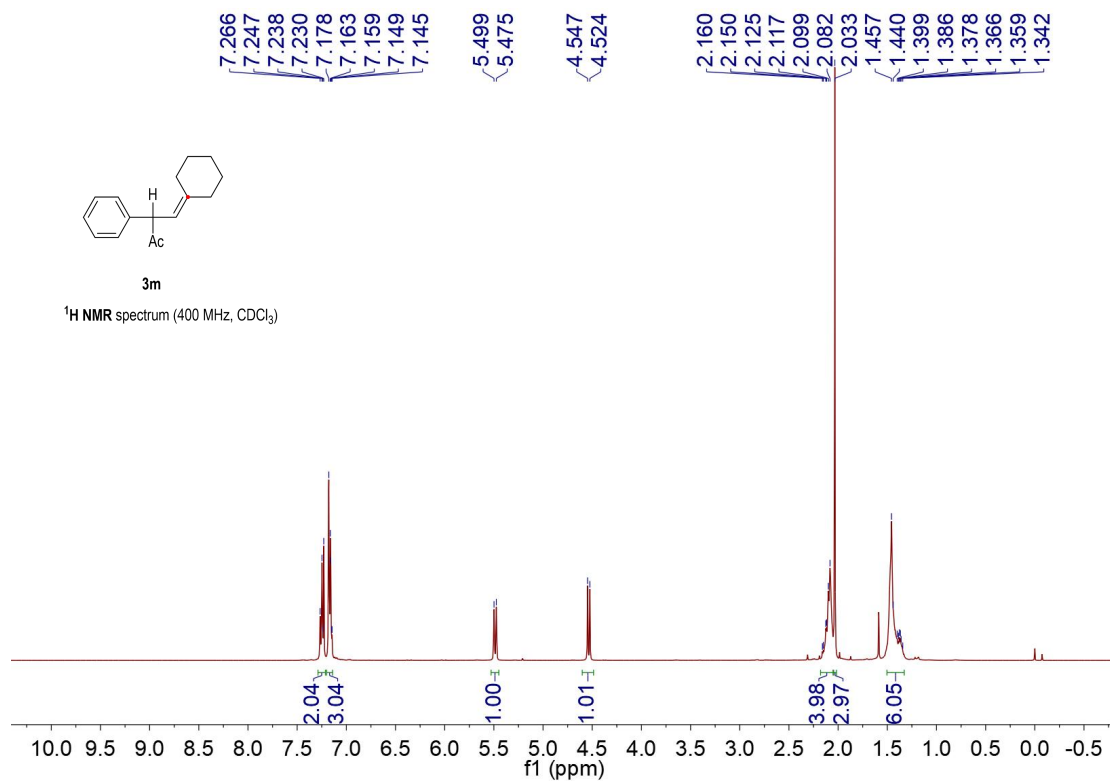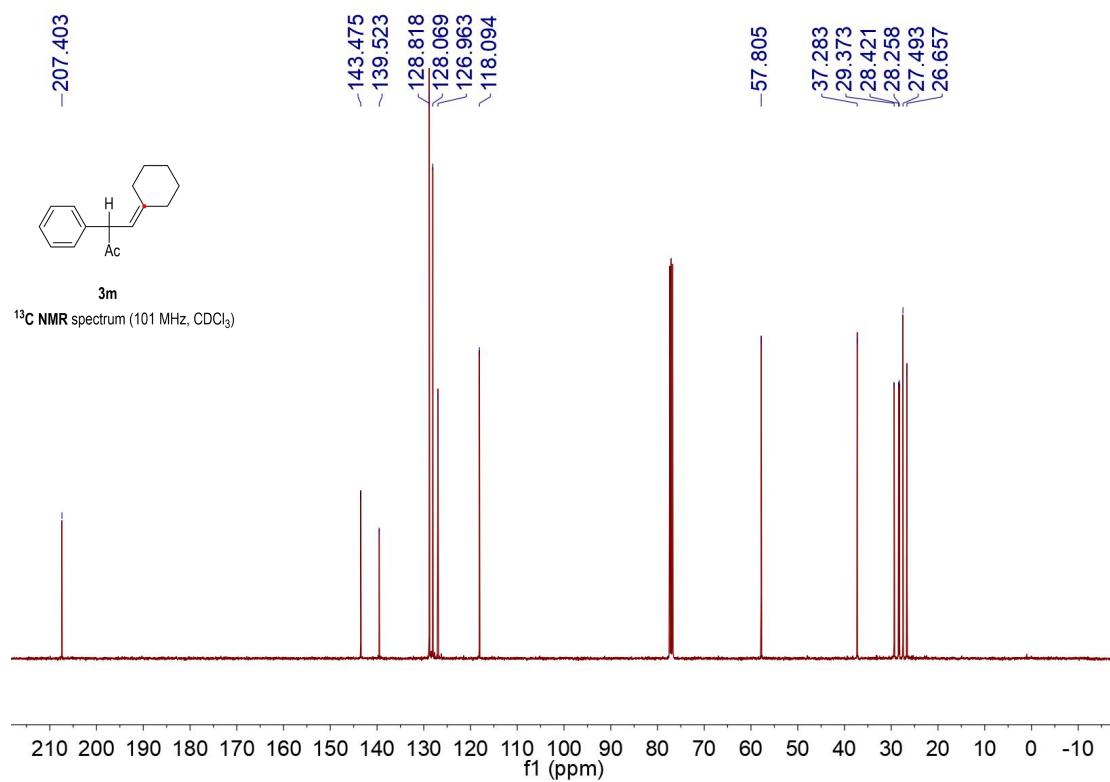

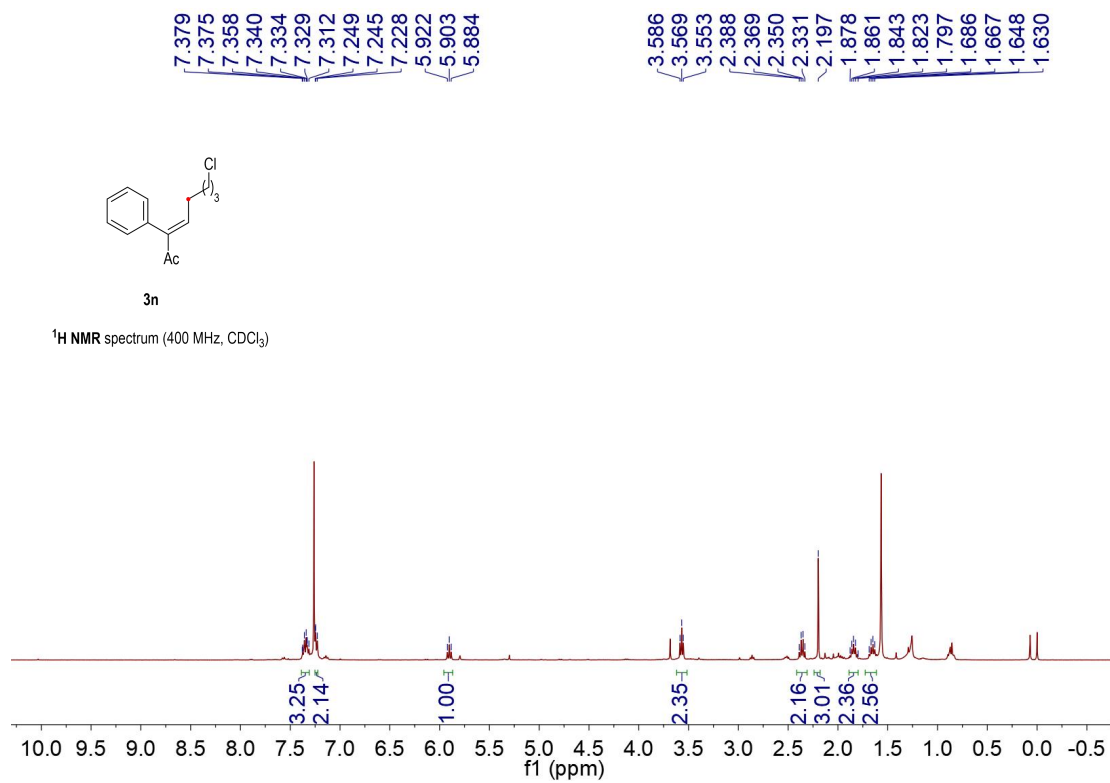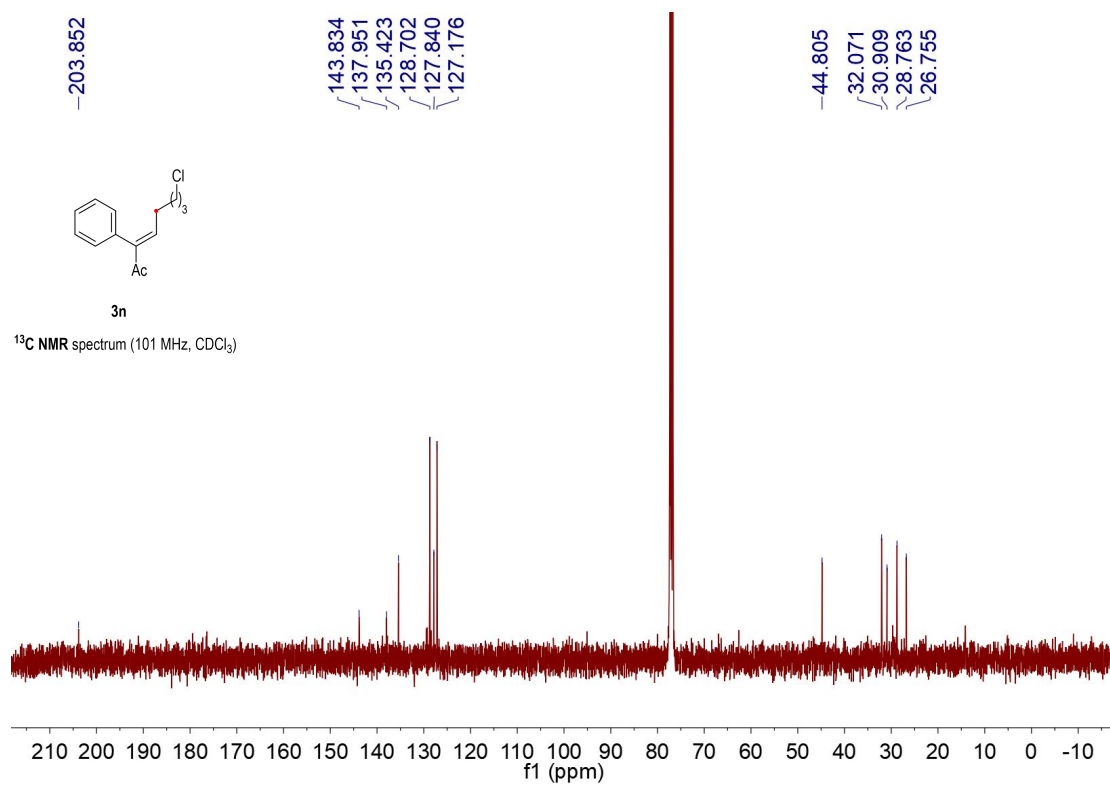

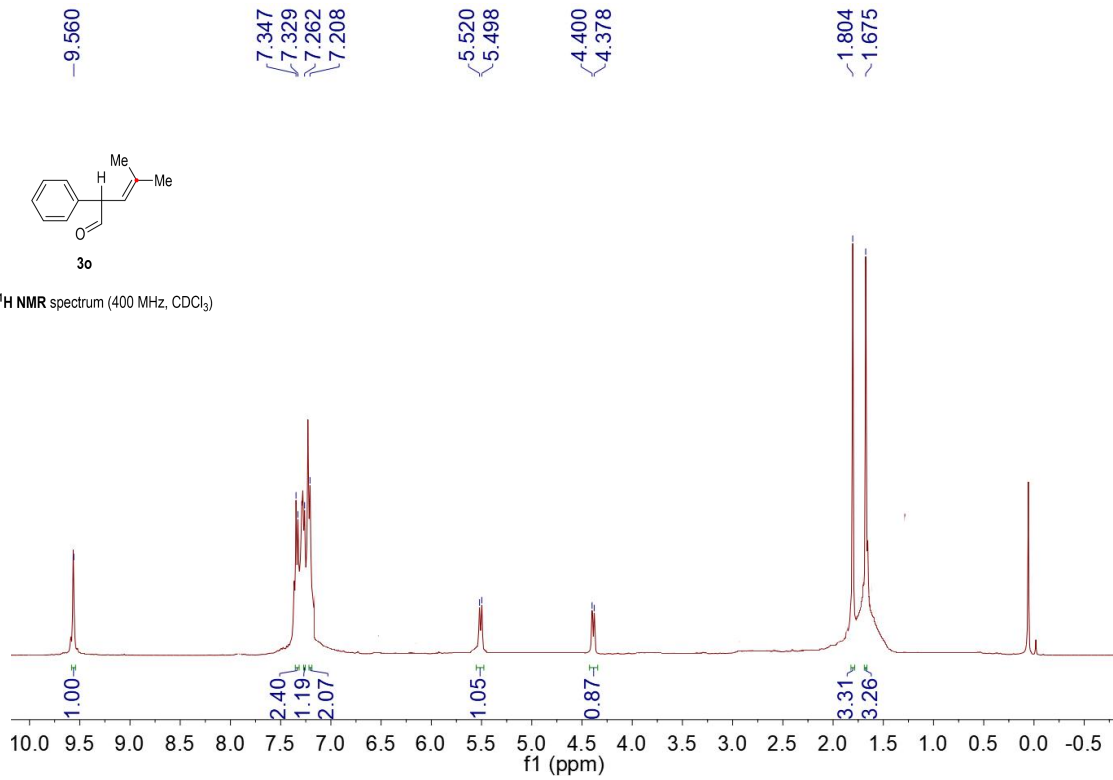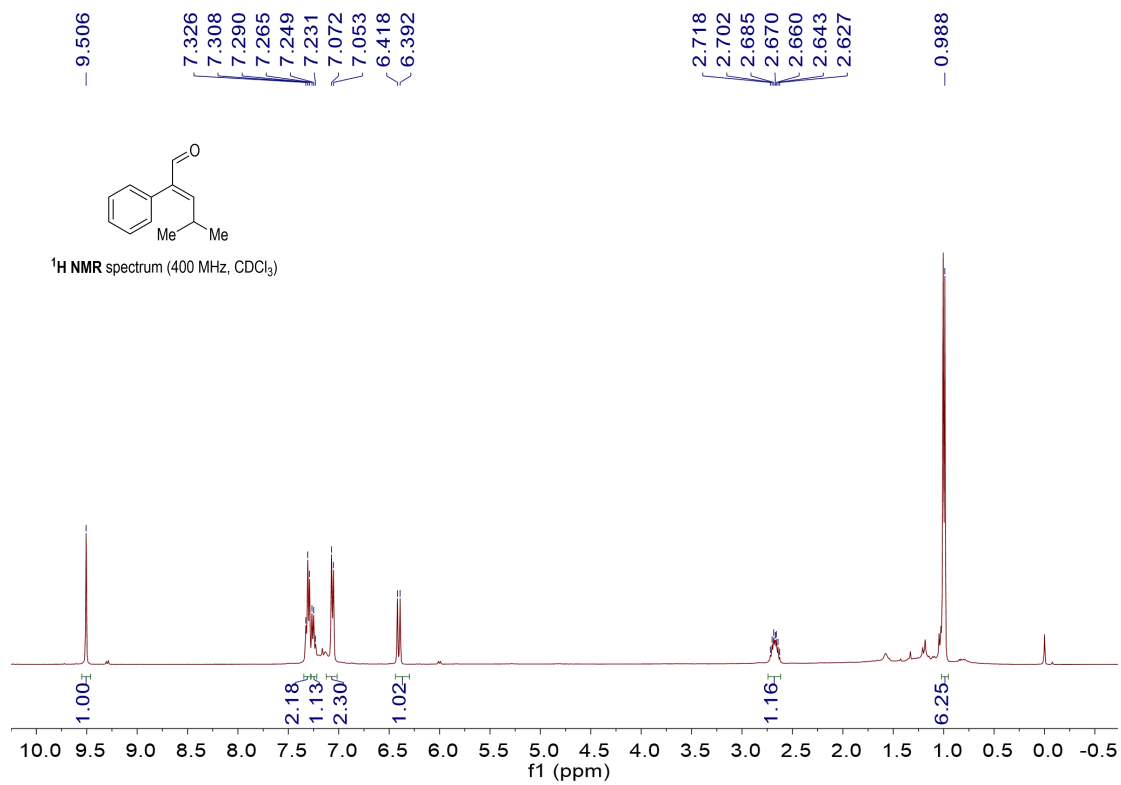

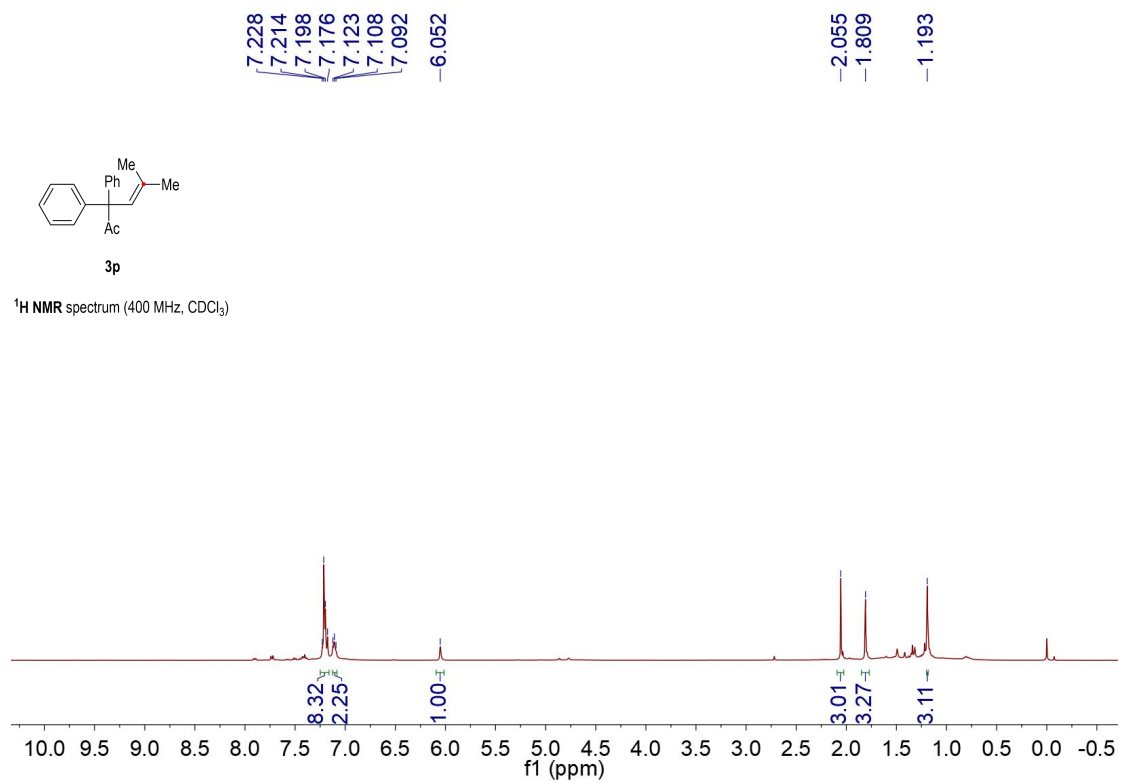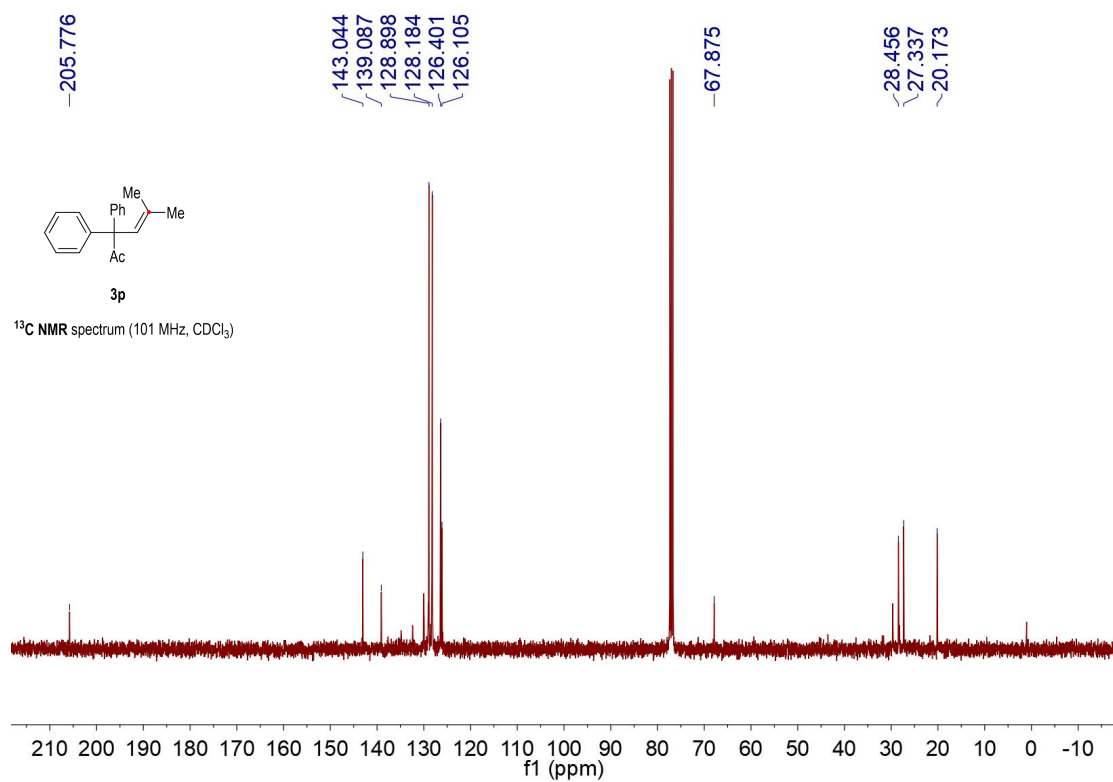

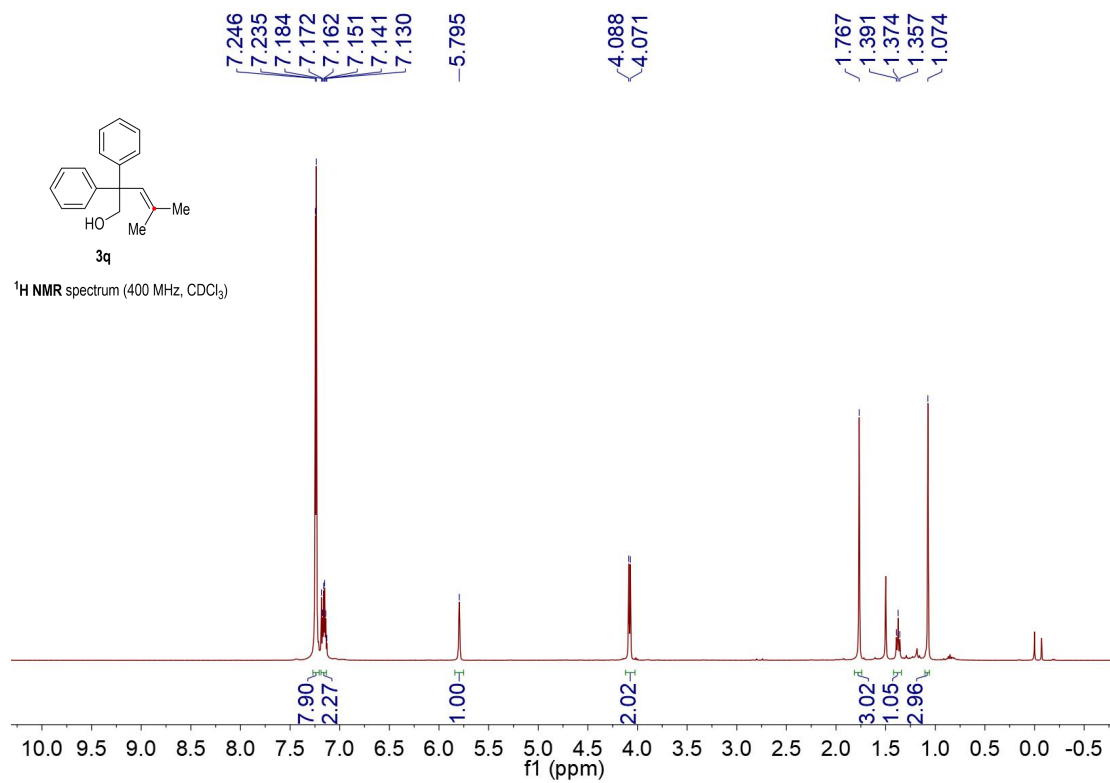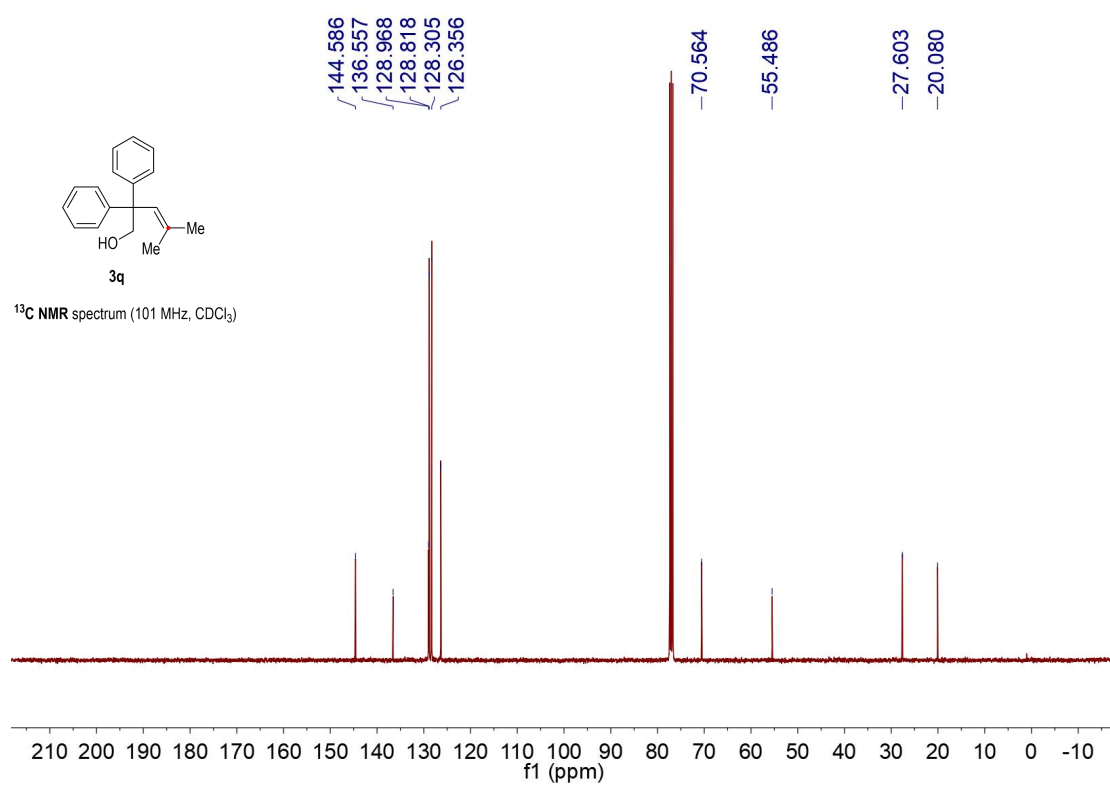

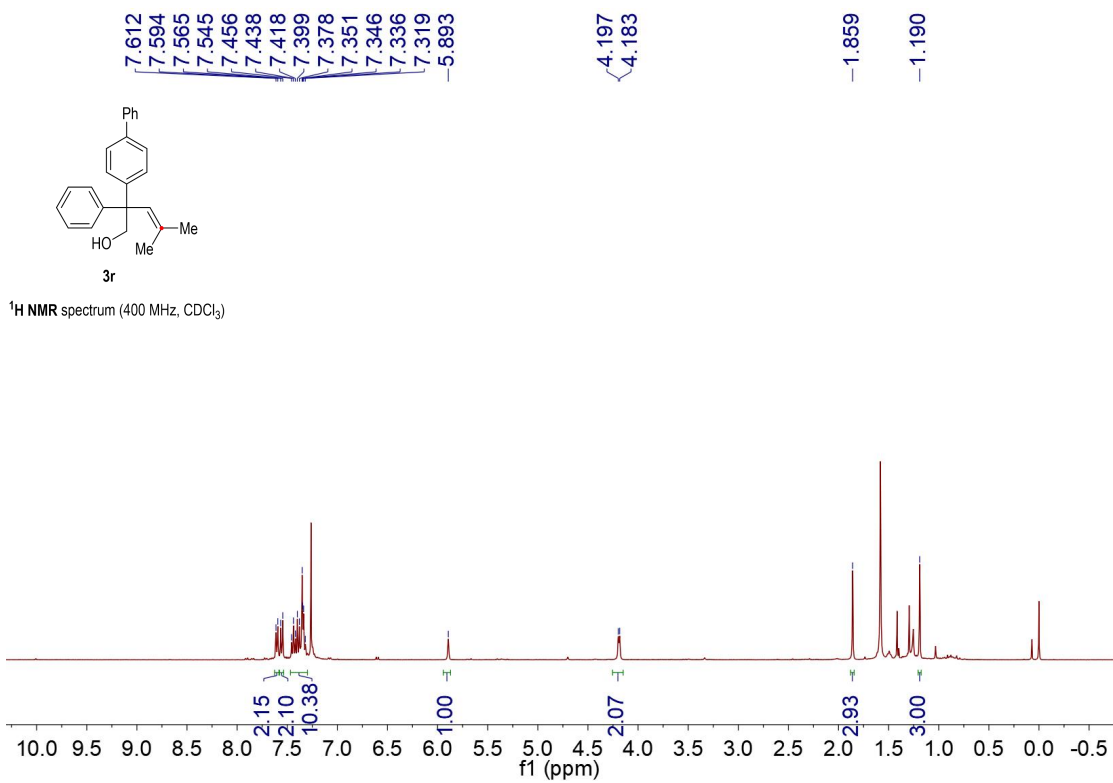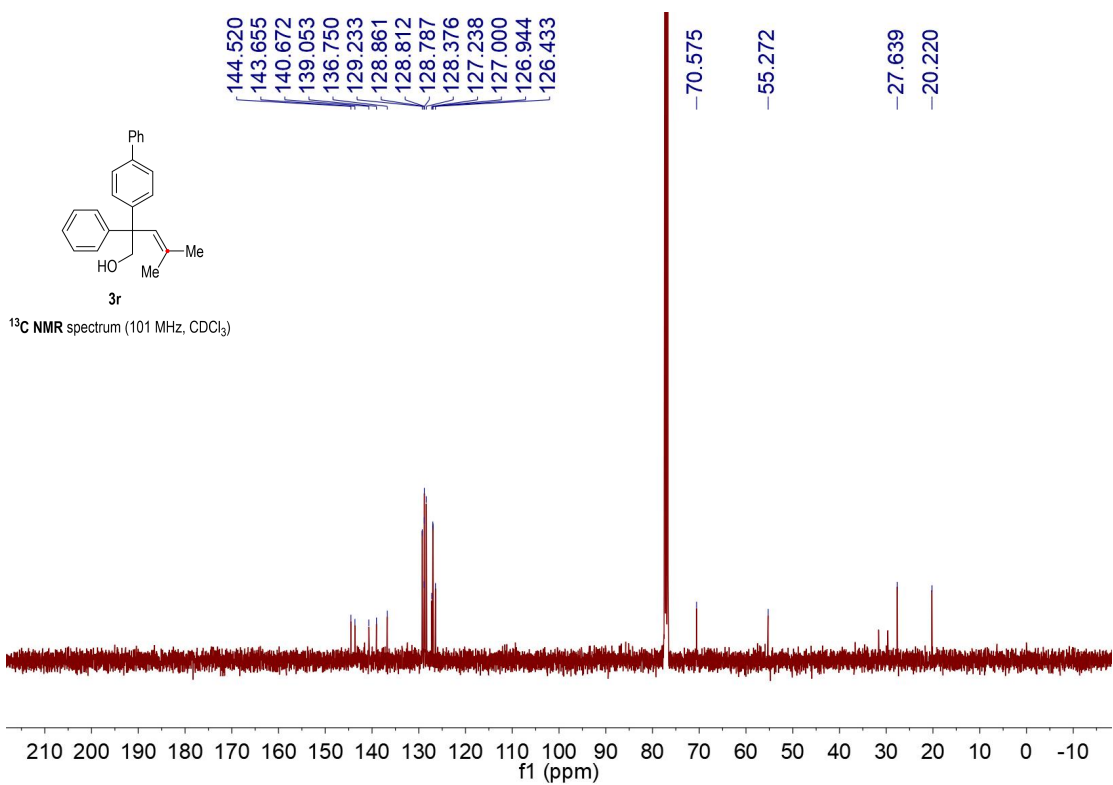

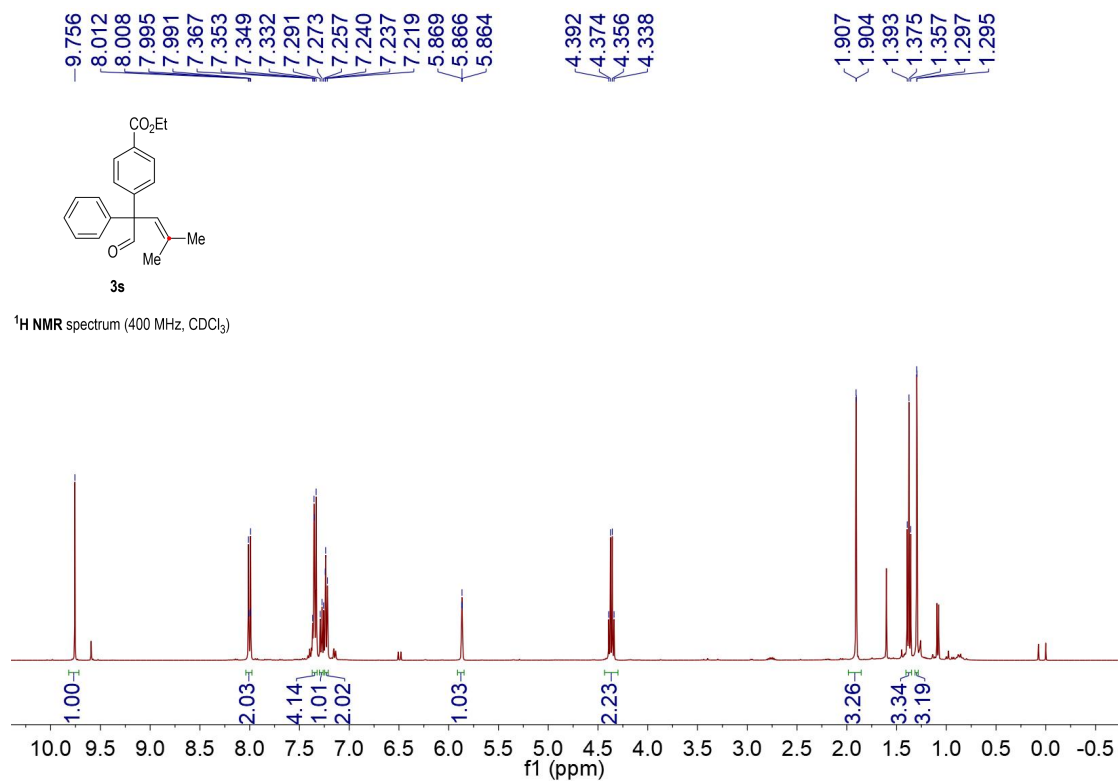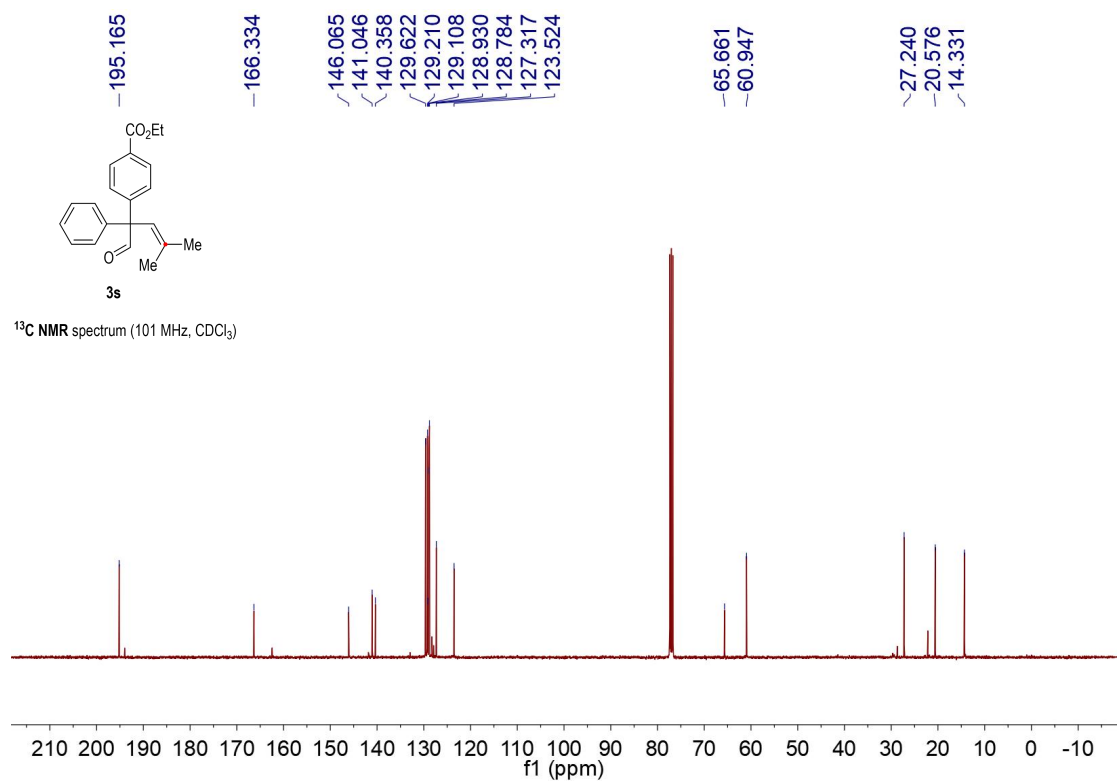

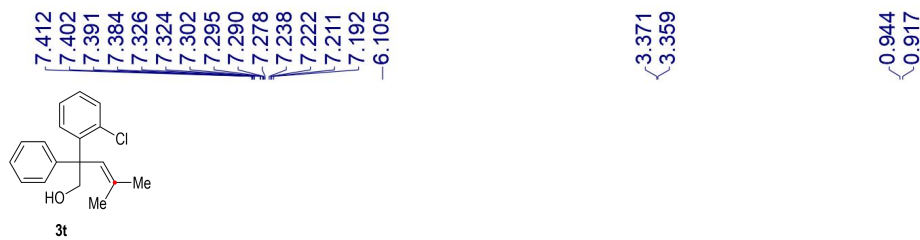

<sup>1</sup>H NMR spectrum (400 MHz, CDCl<sub>3</sub>)

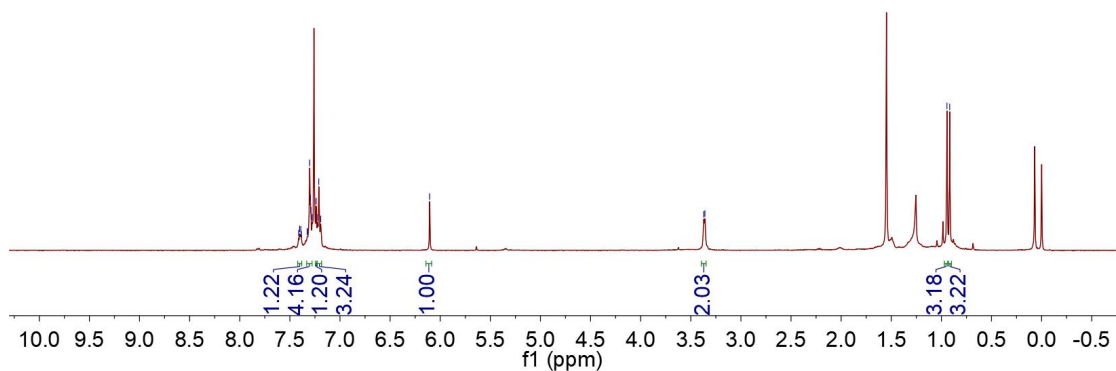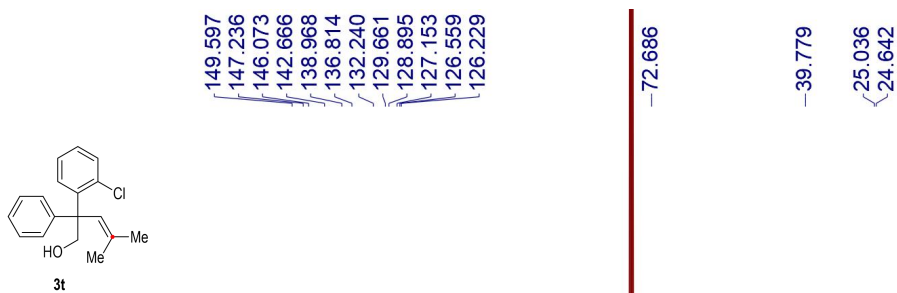

<sup>13</sup>C NMR spectrum (101 MHz, CDCl<sub>3</sub>)

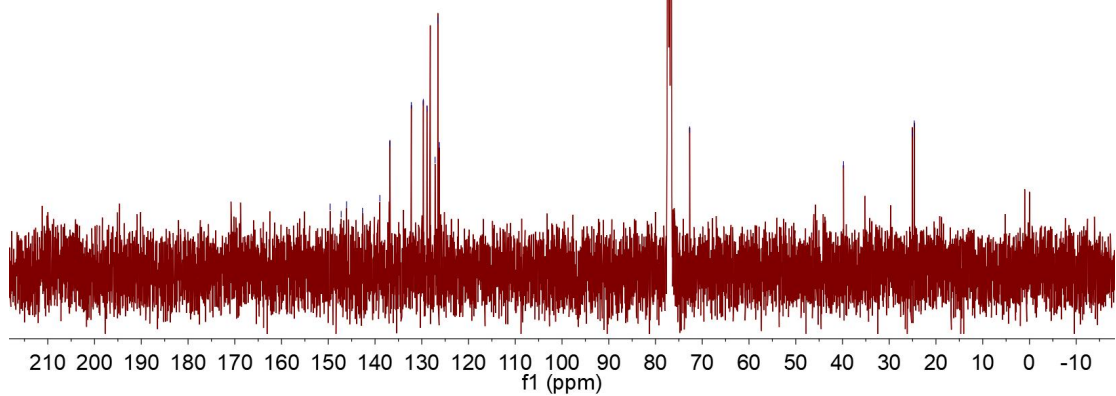

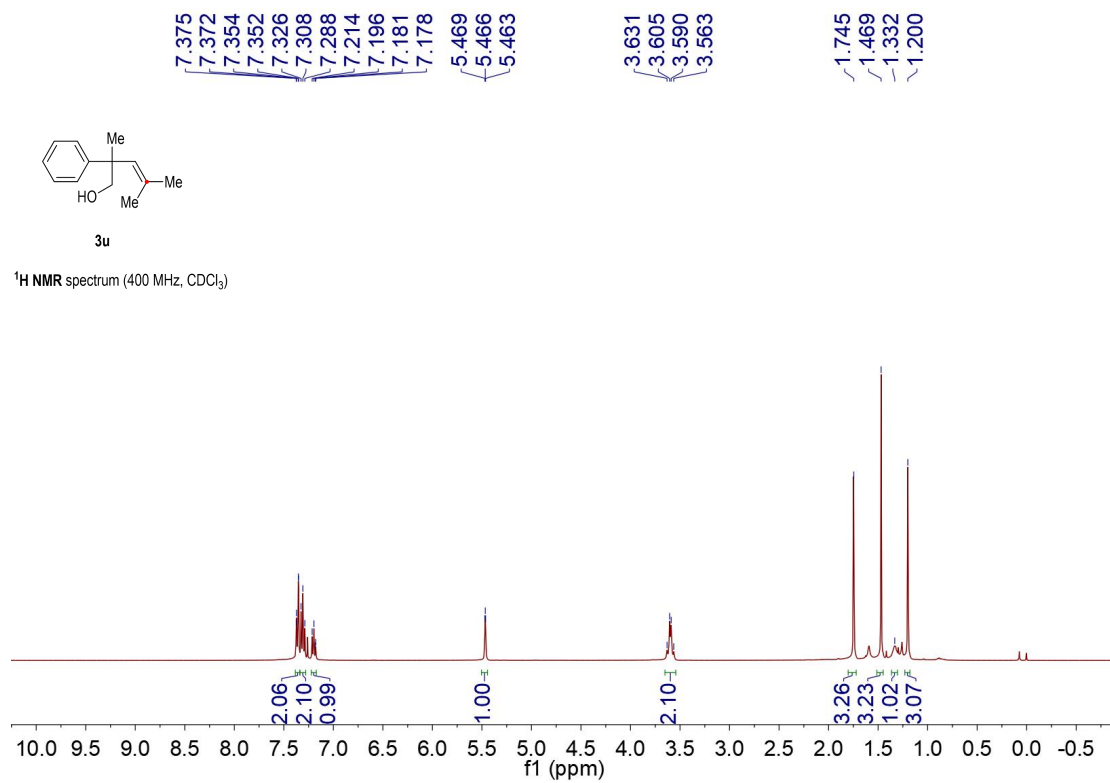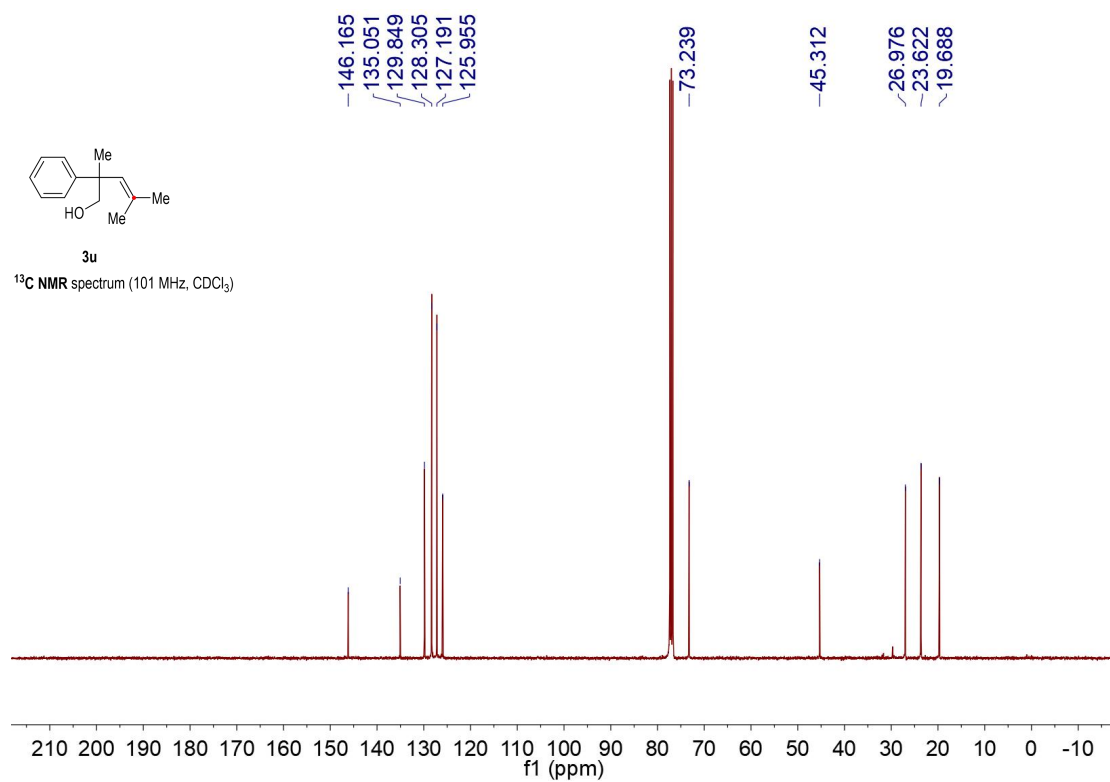

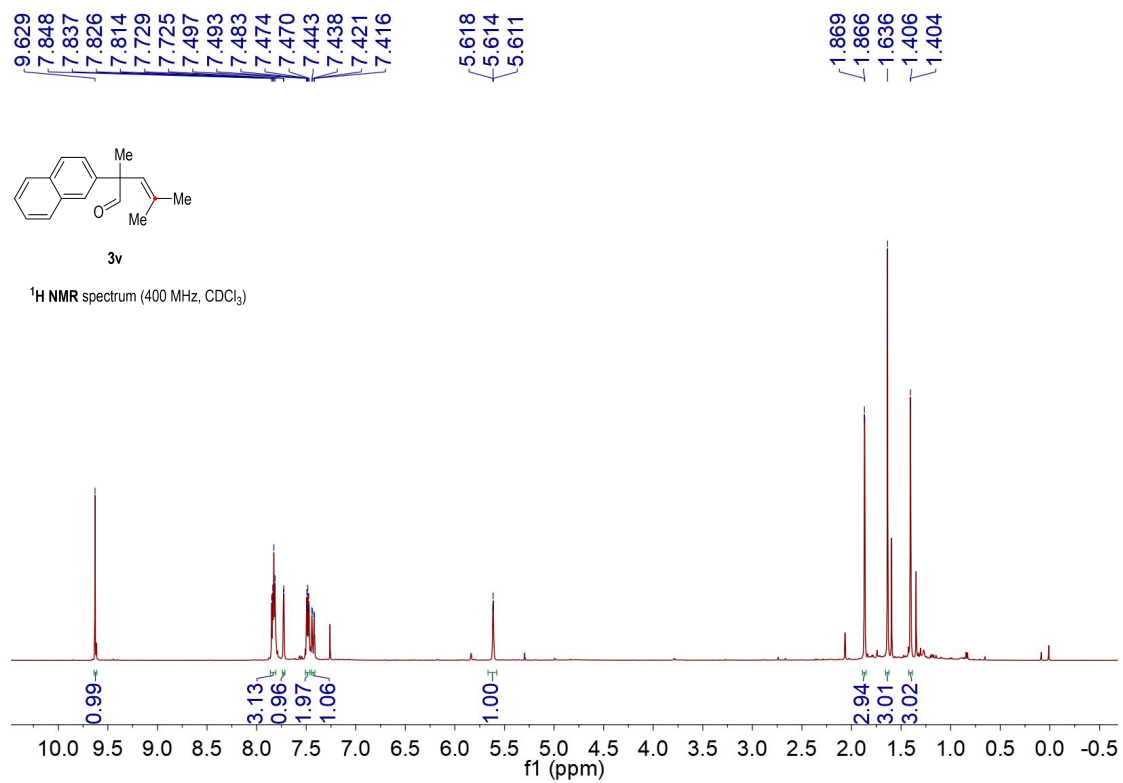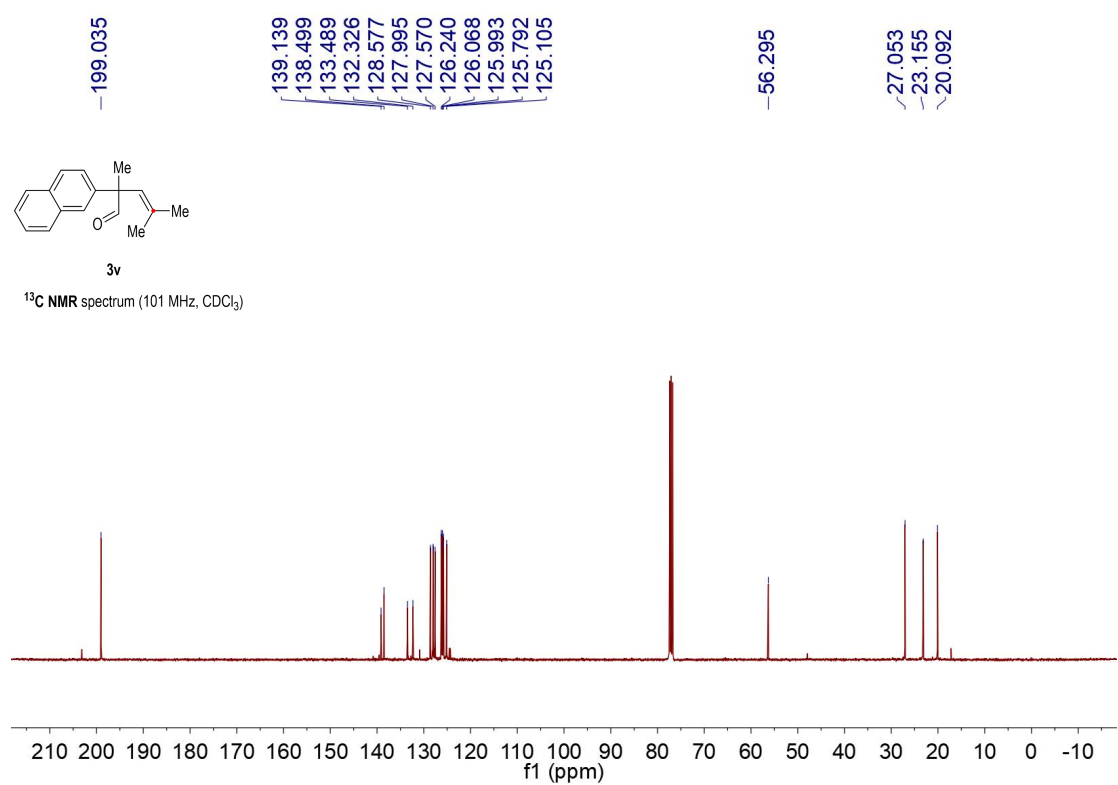

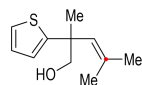

3w

<sup>1</sup>H NMR spectrum (400 MHz, CDCl<sub>3</sub>)

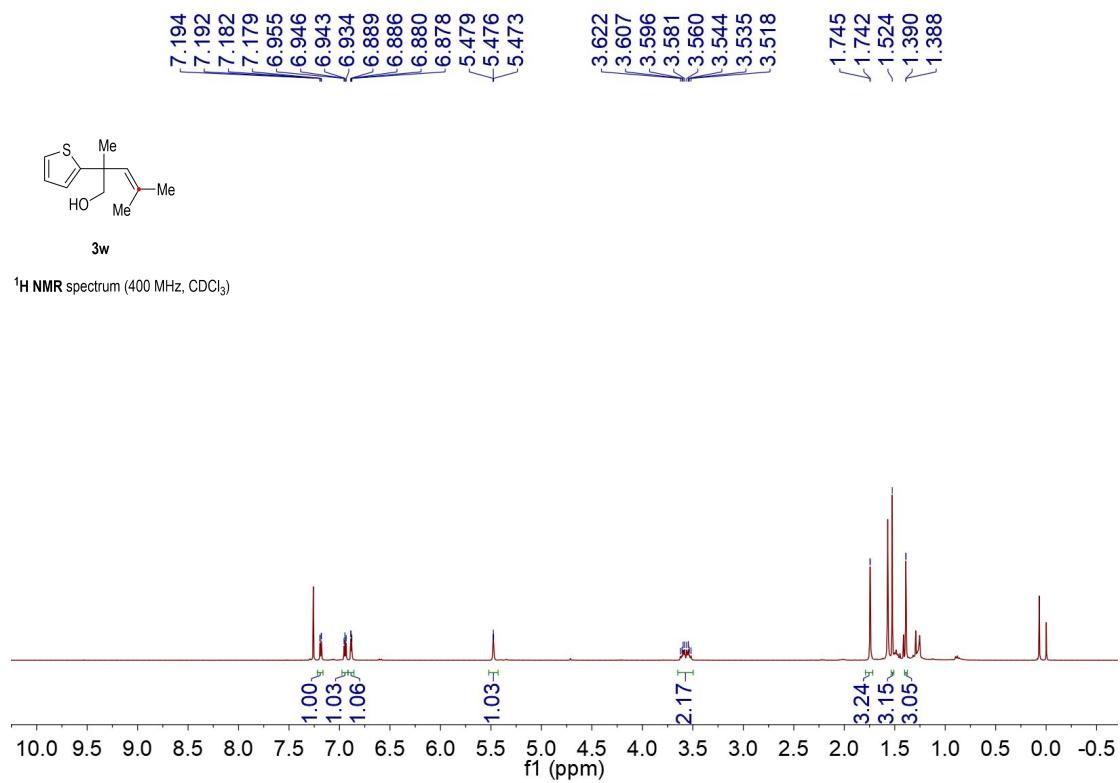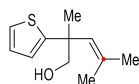

3w

<sup>13</sup>C NMR spectrum (101 MHz, CDCl<sub>3</sub>)

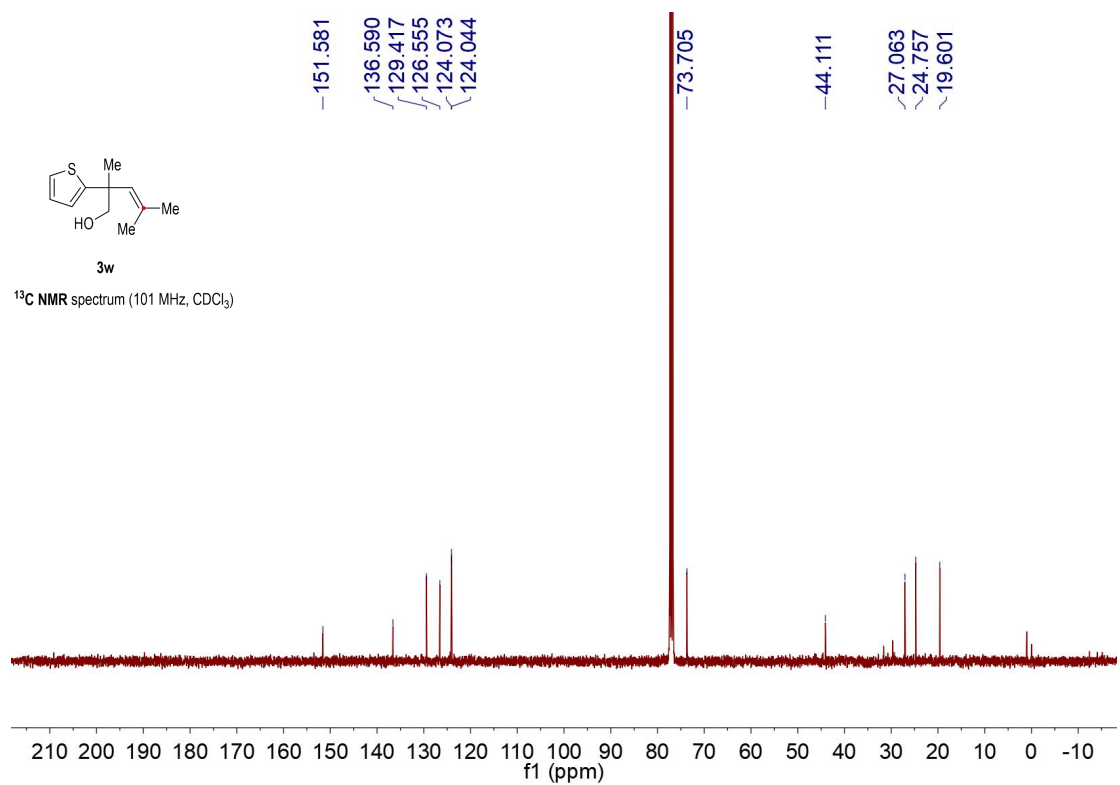

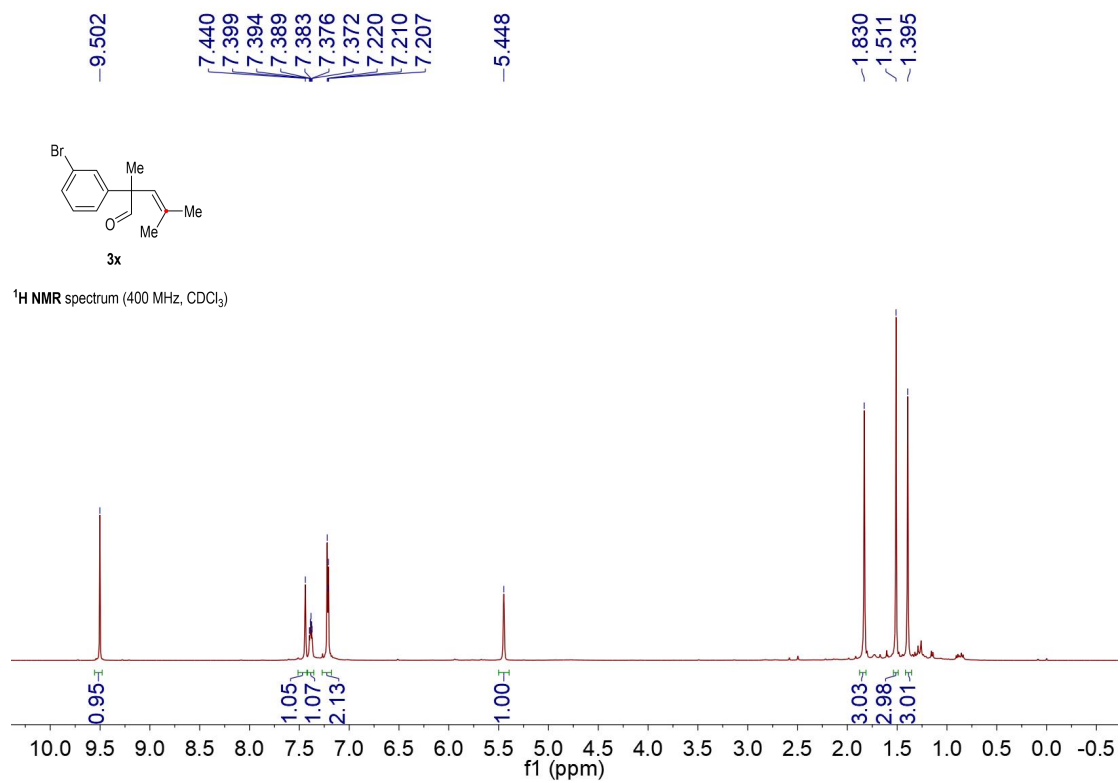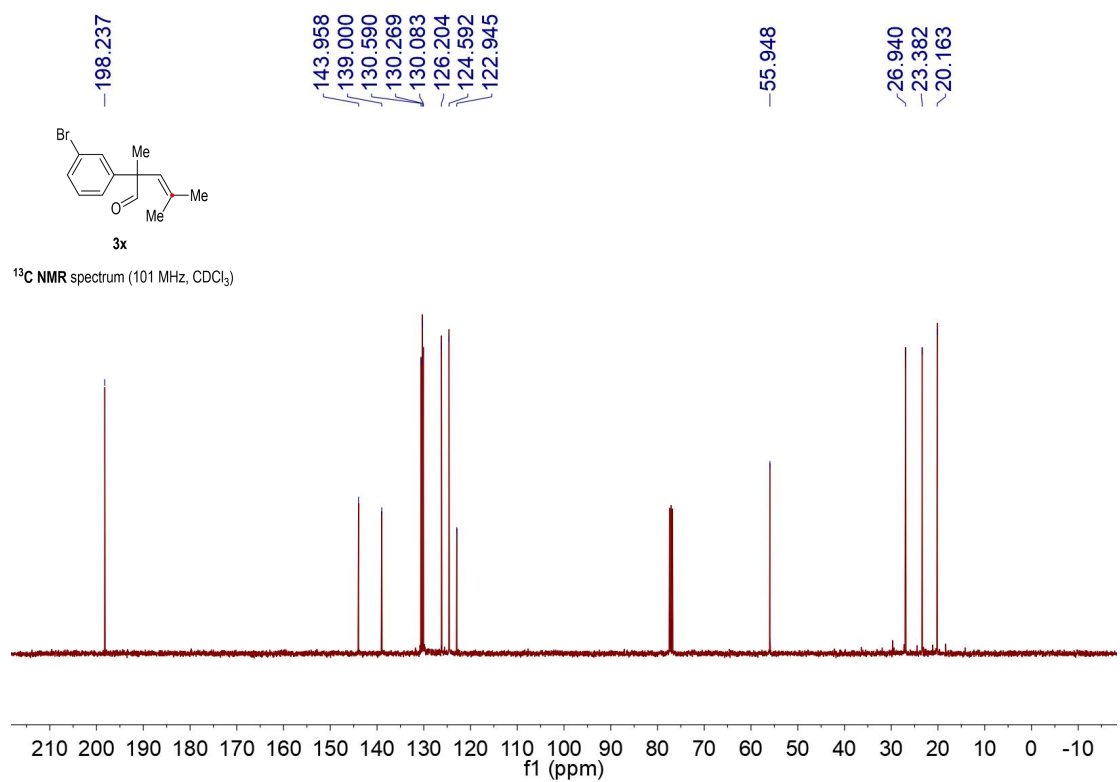



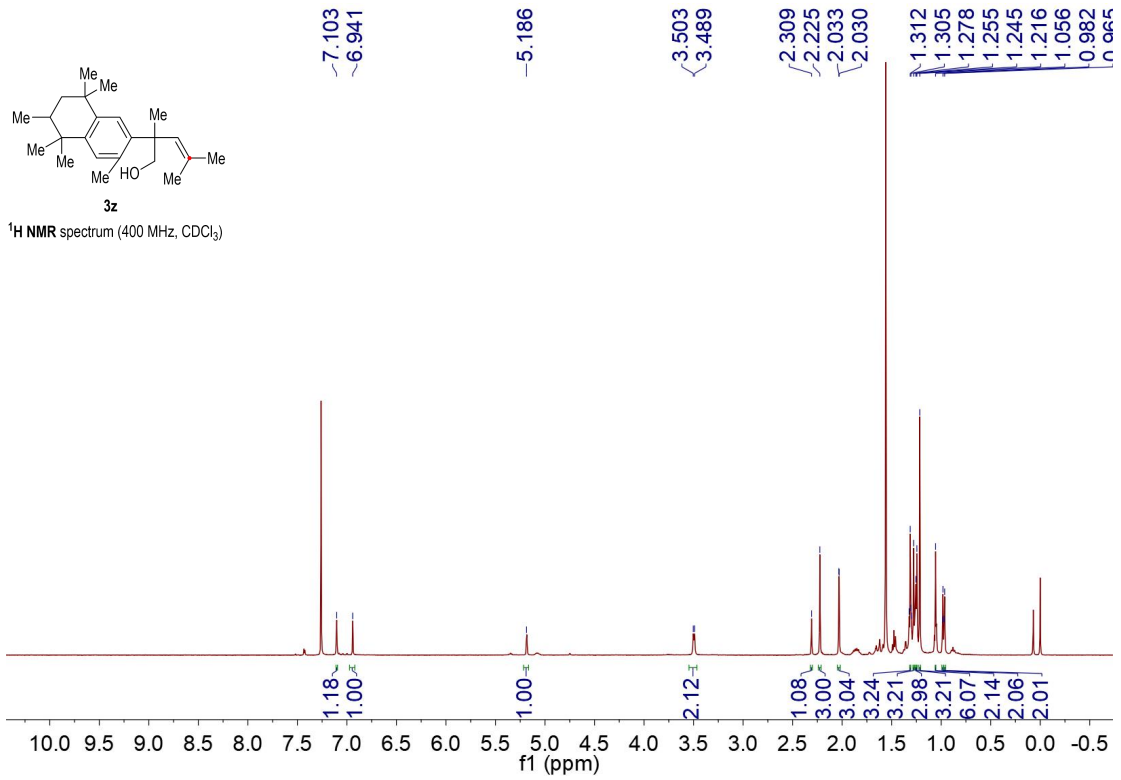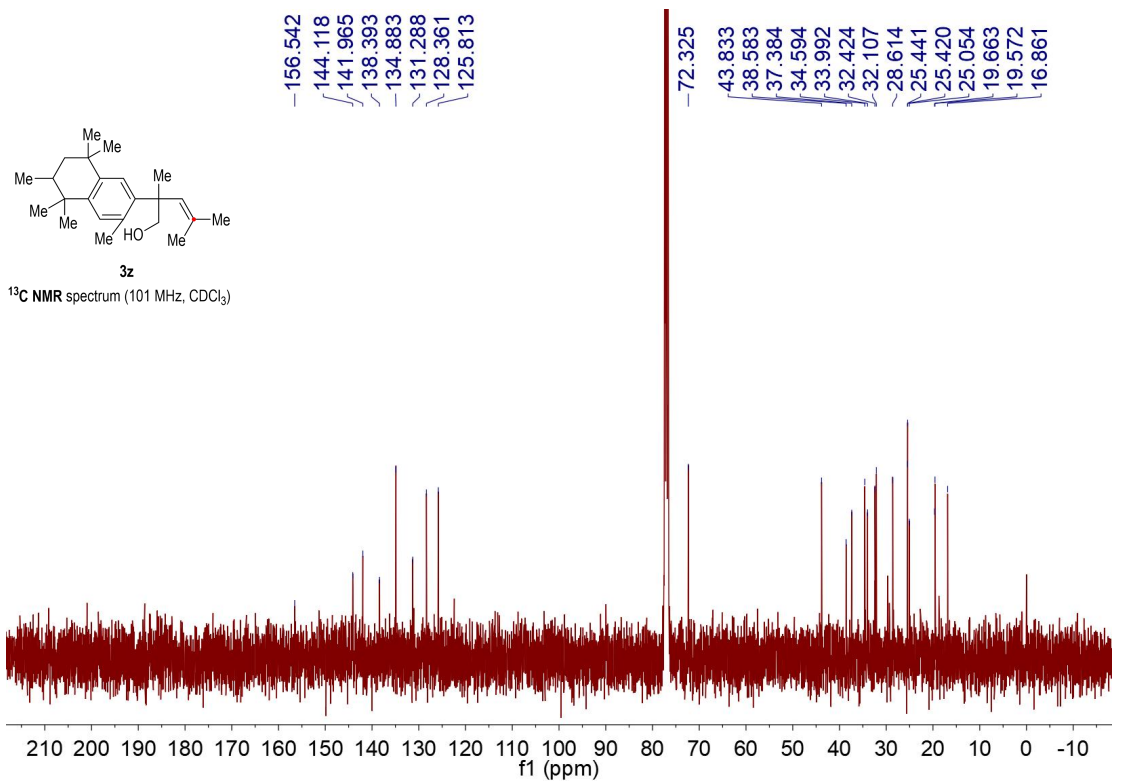

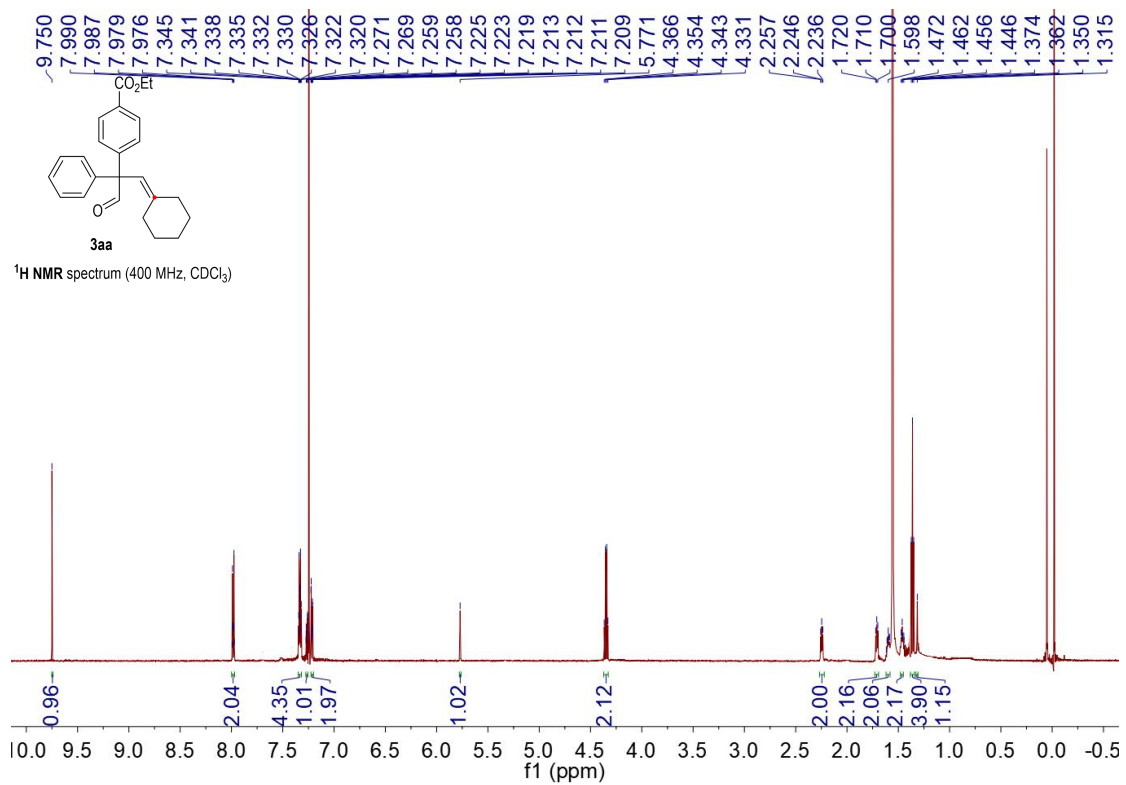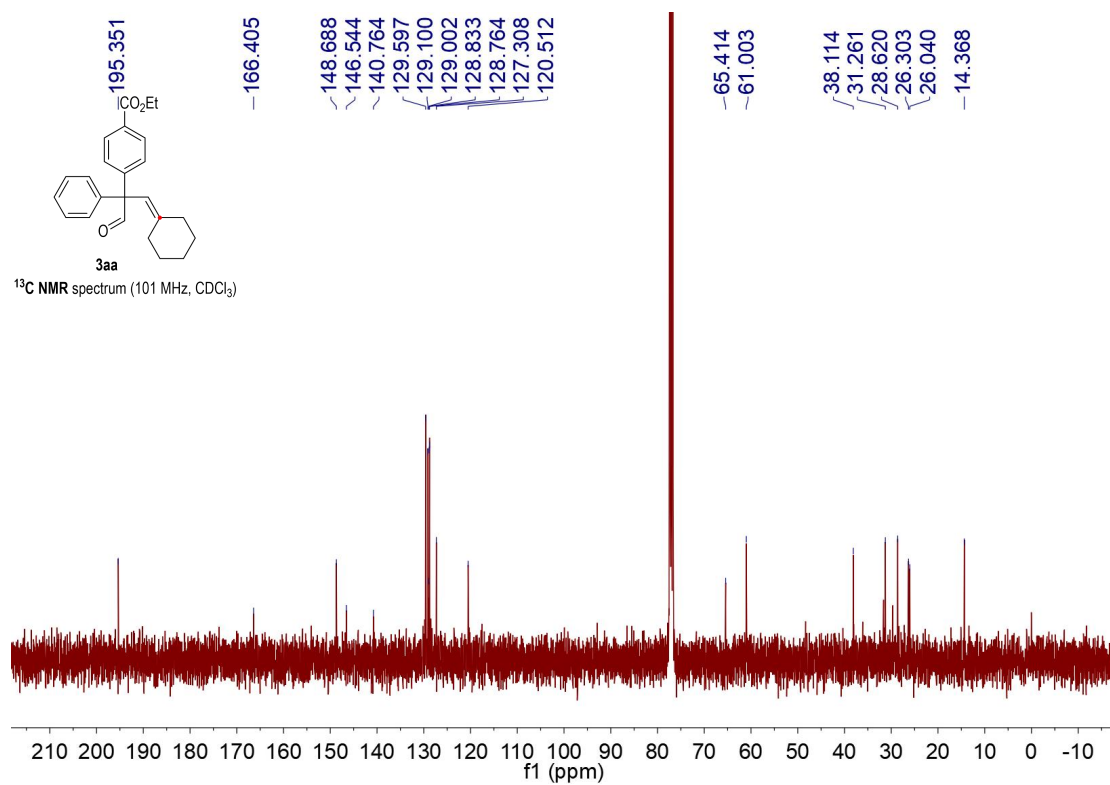

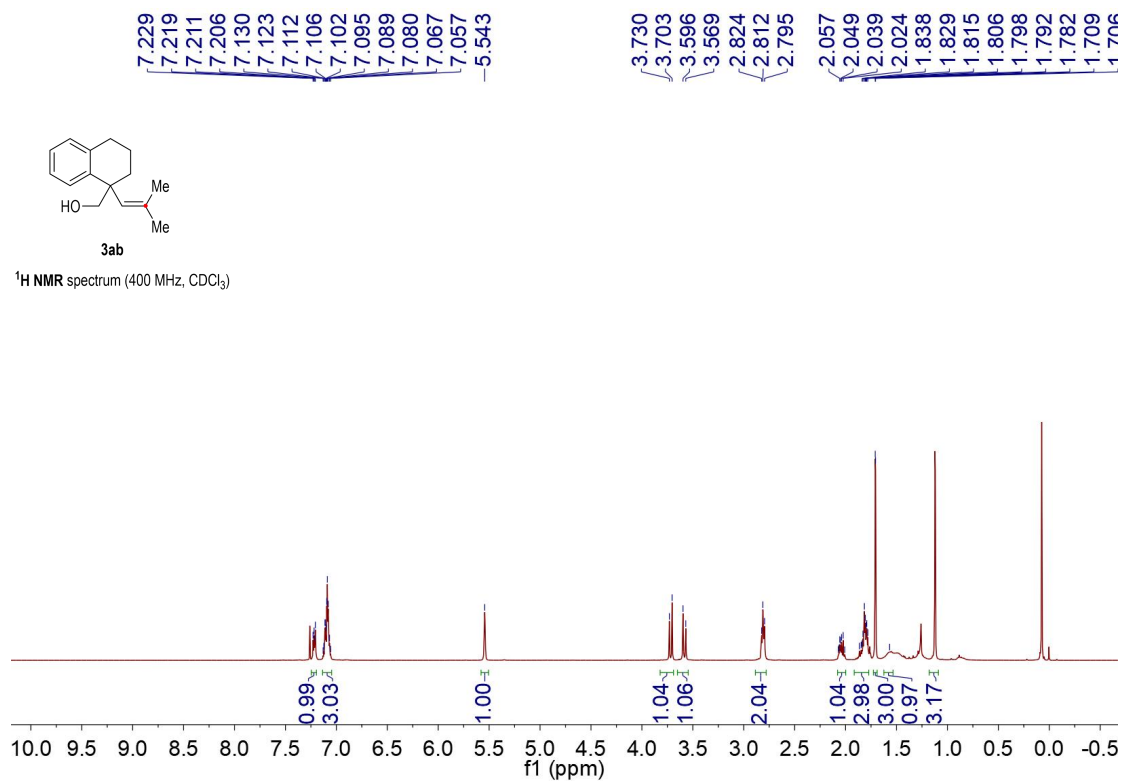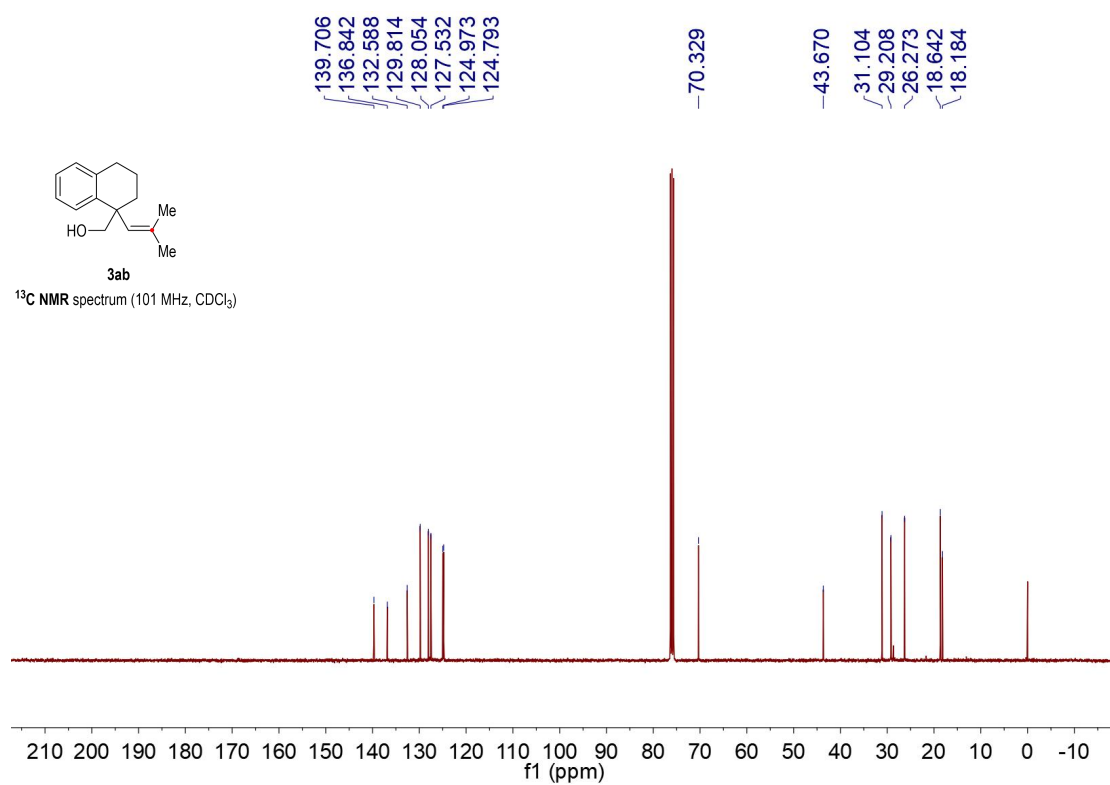

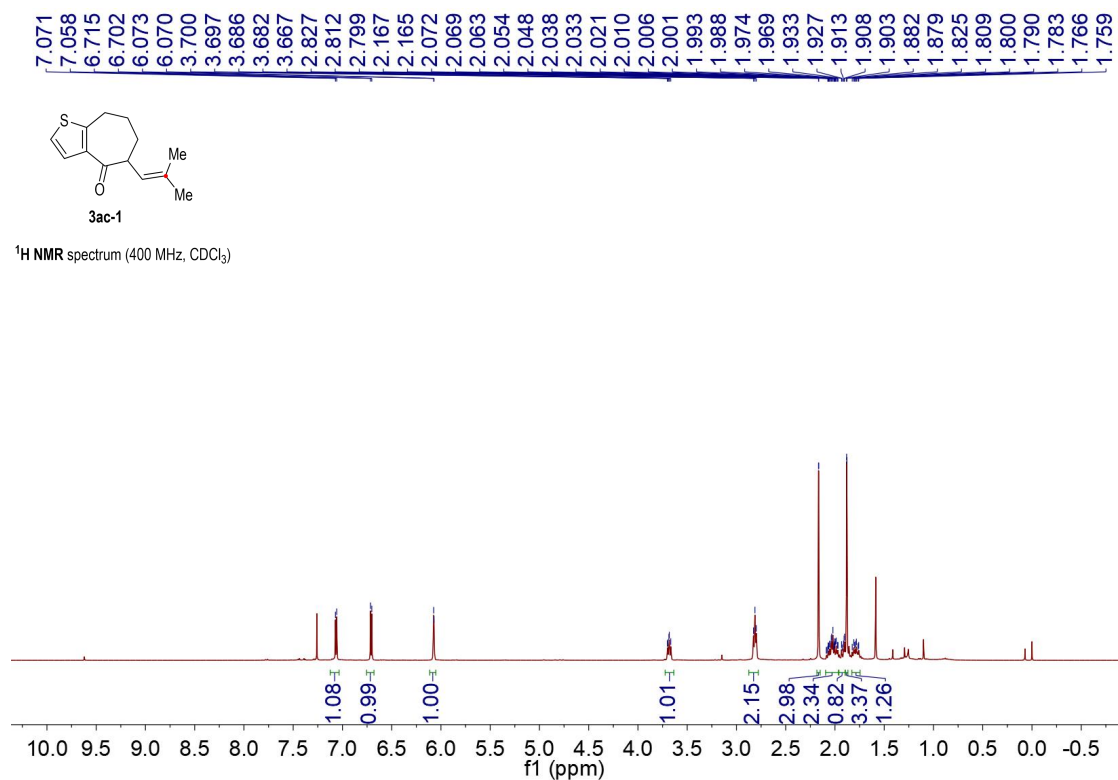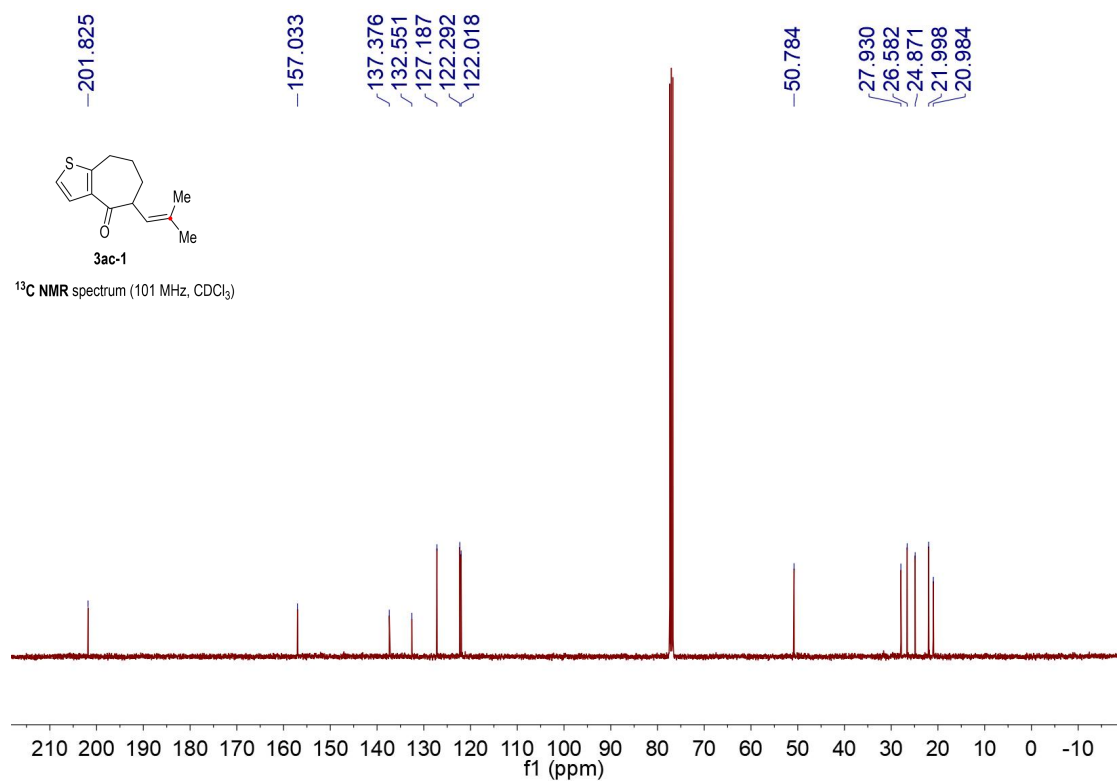

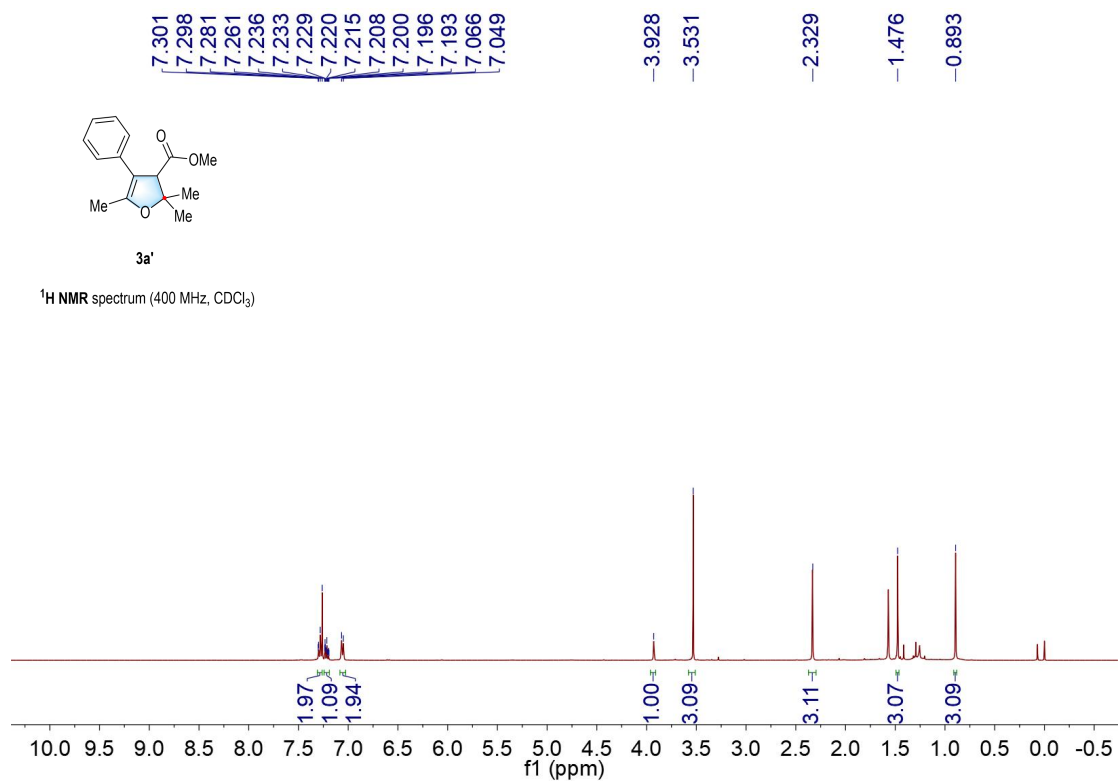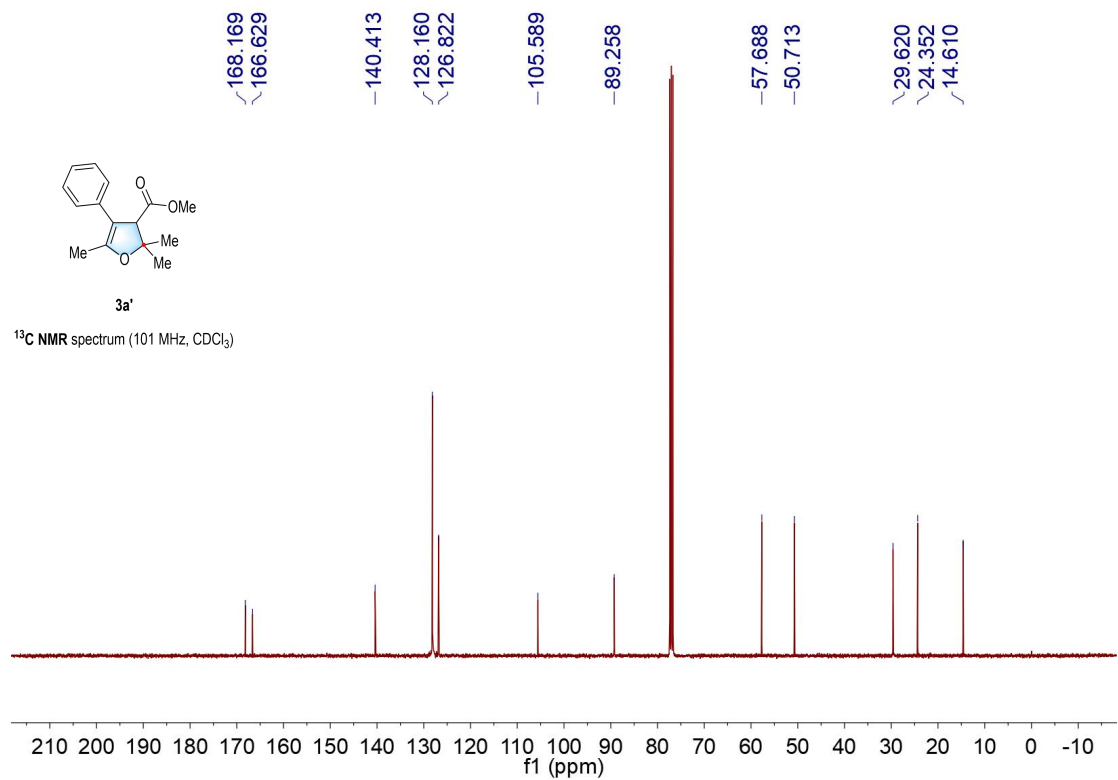

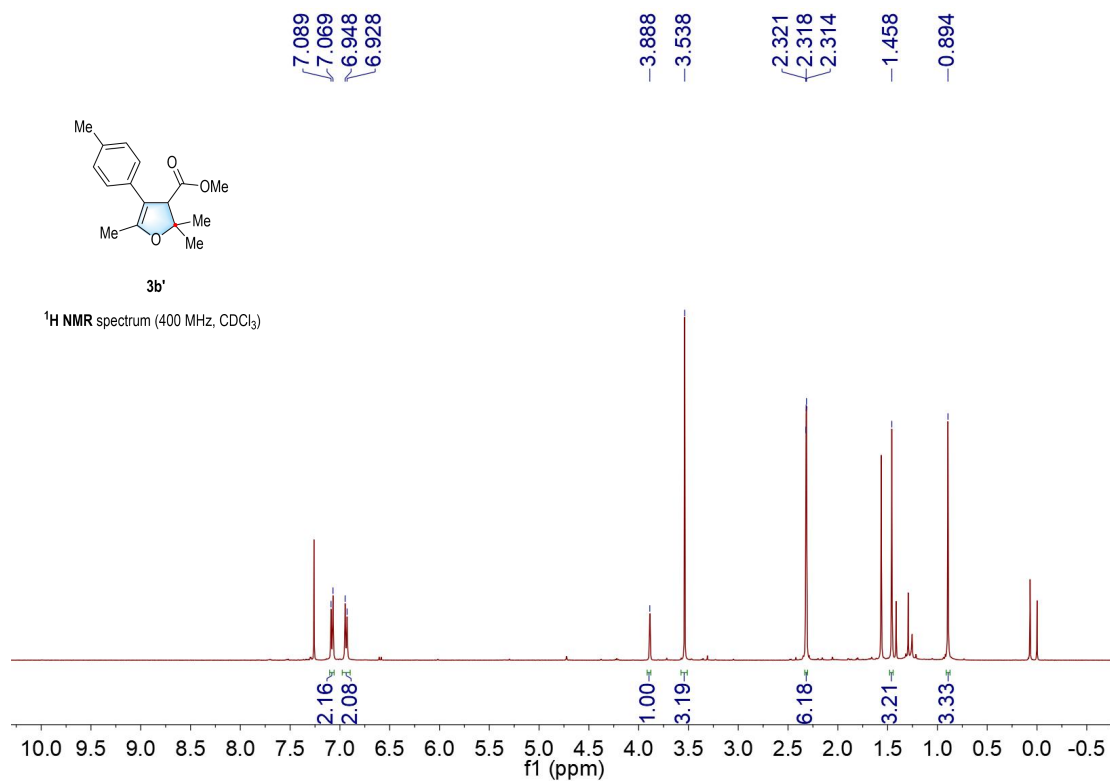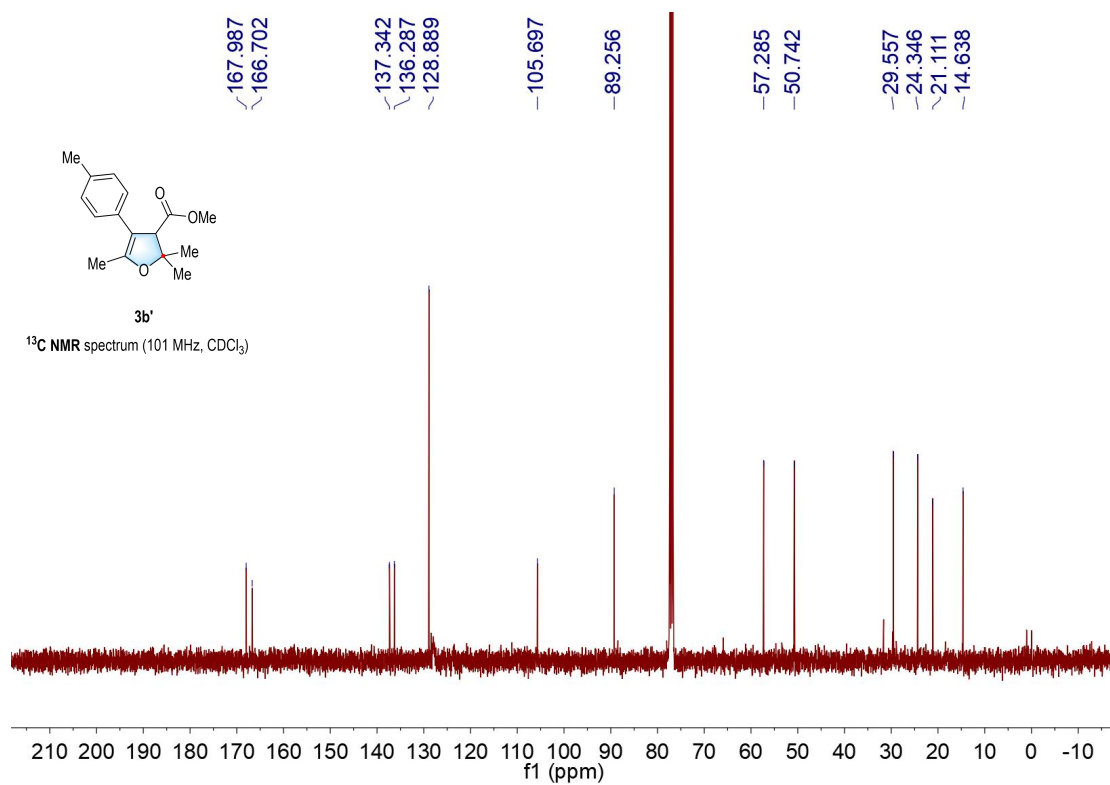

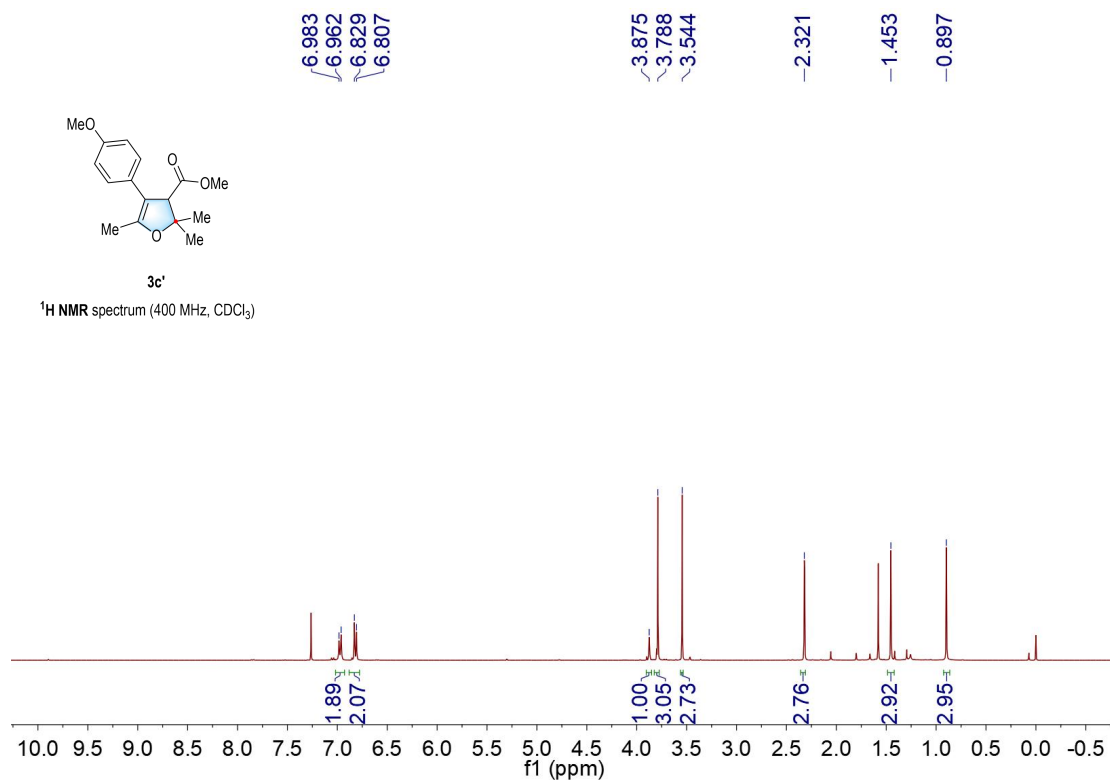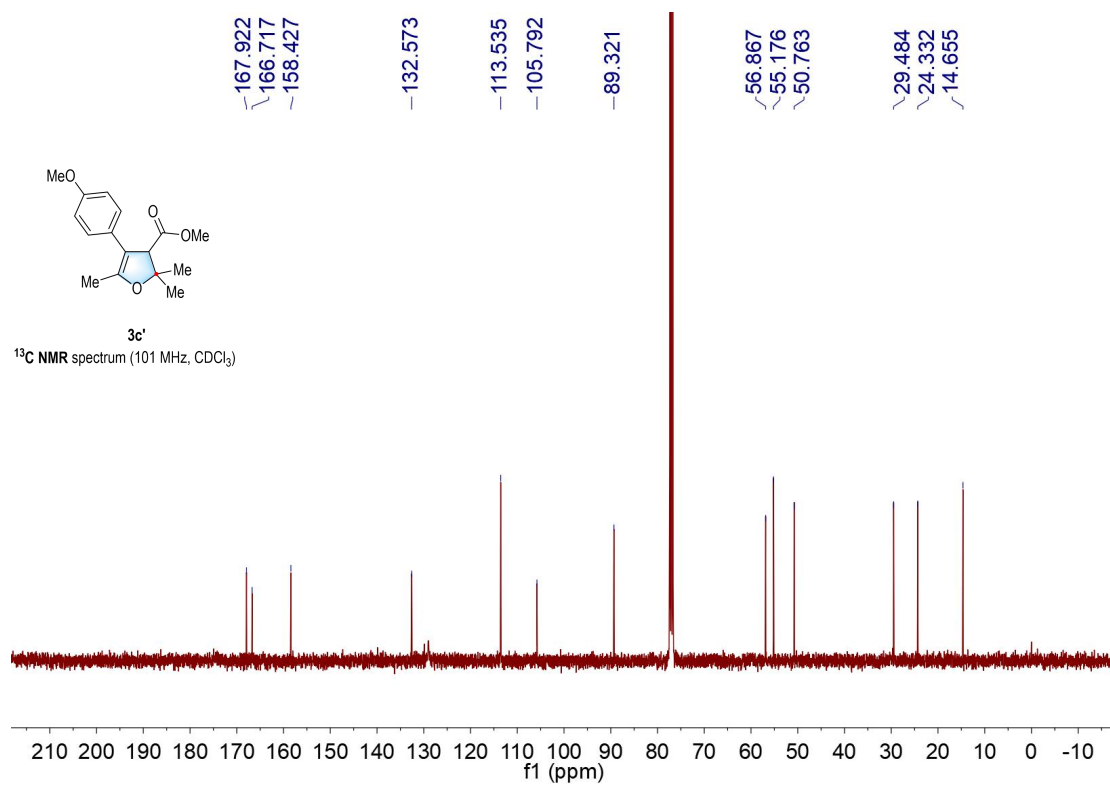

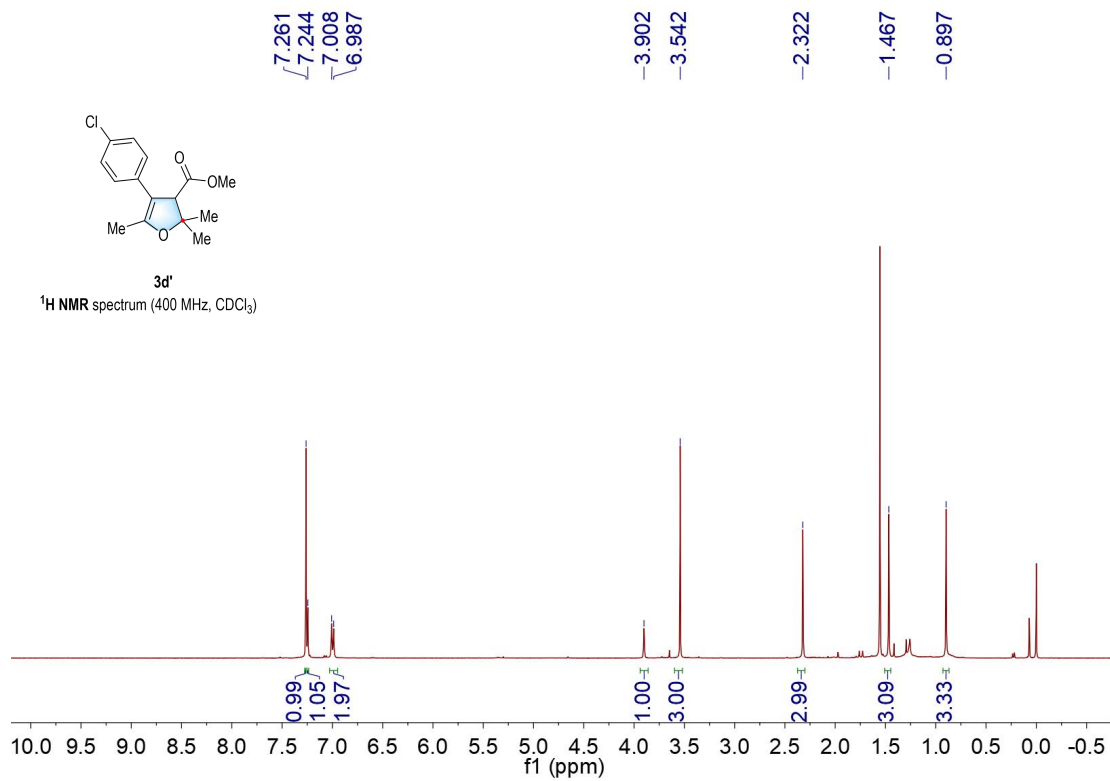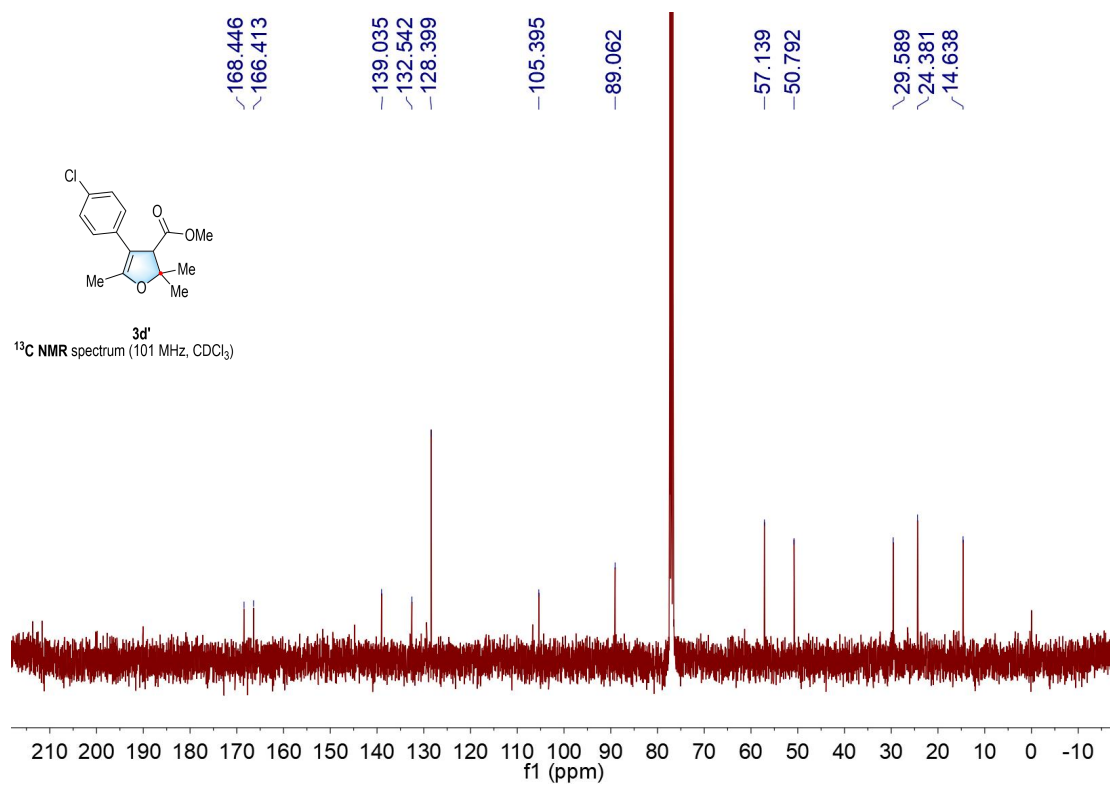

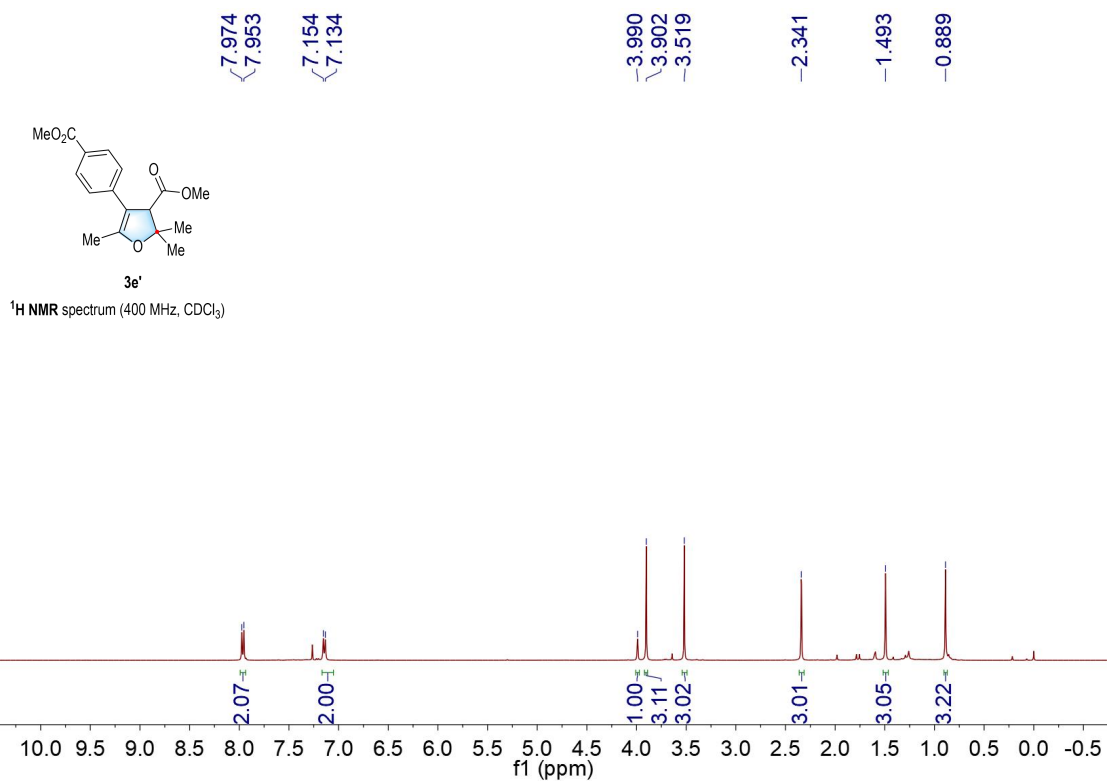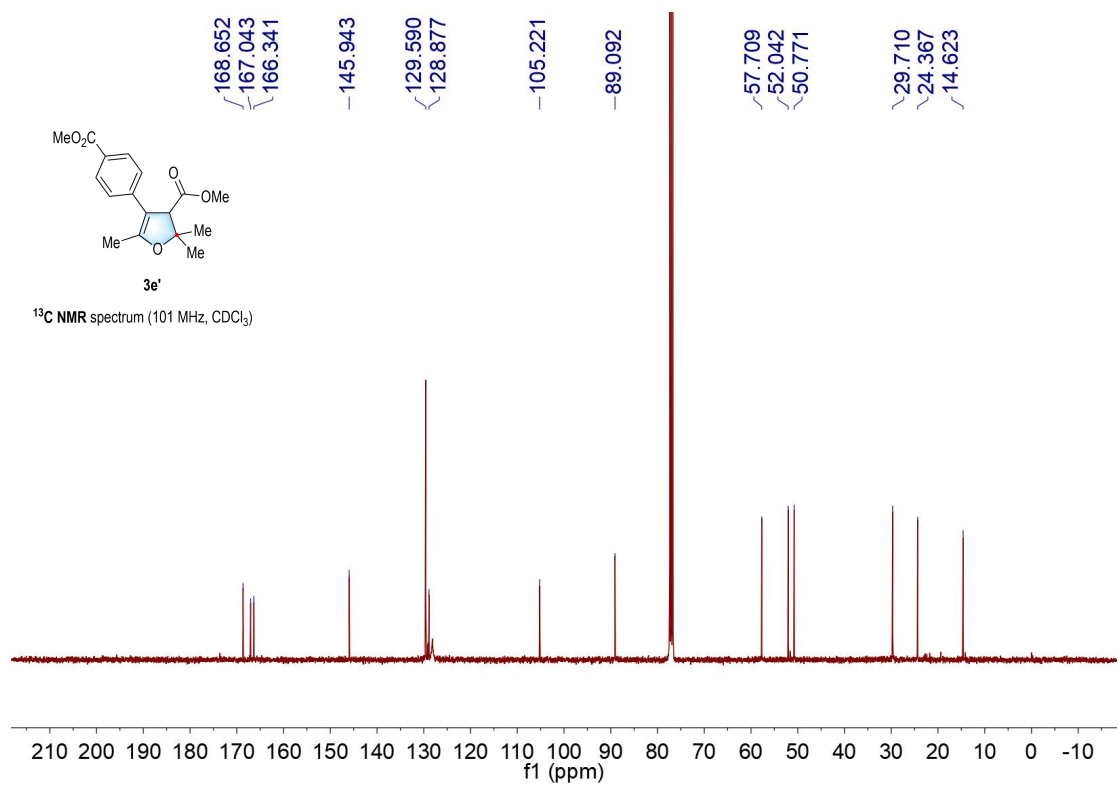

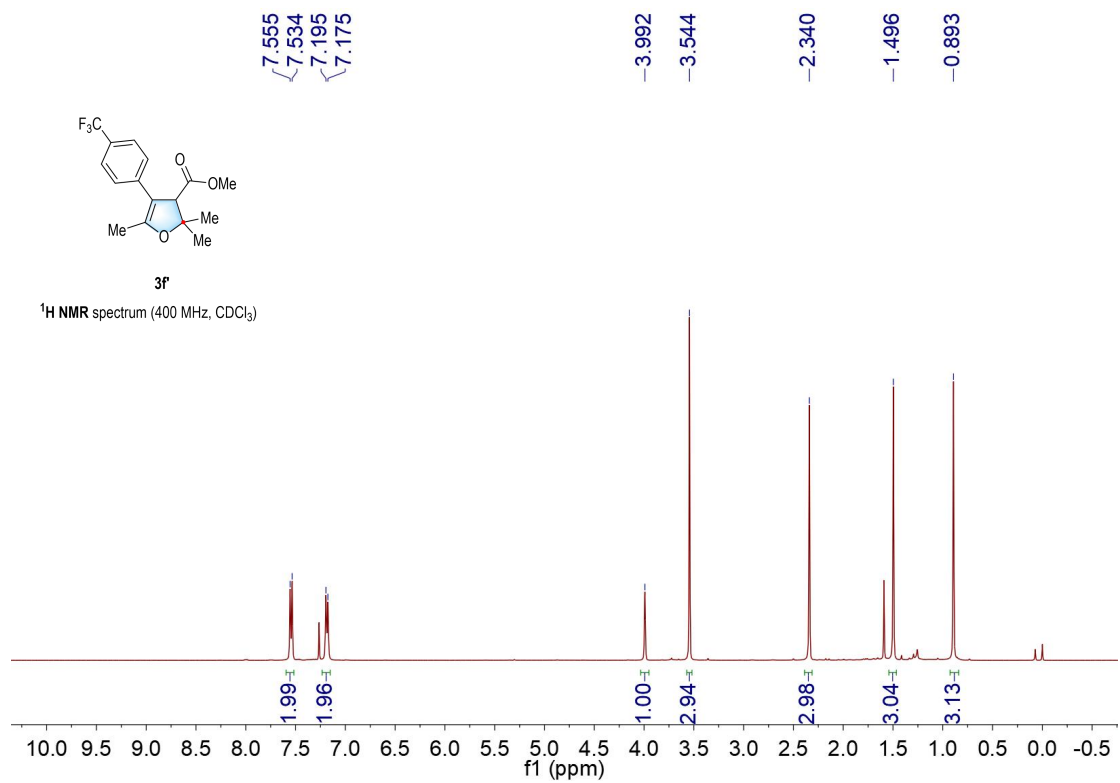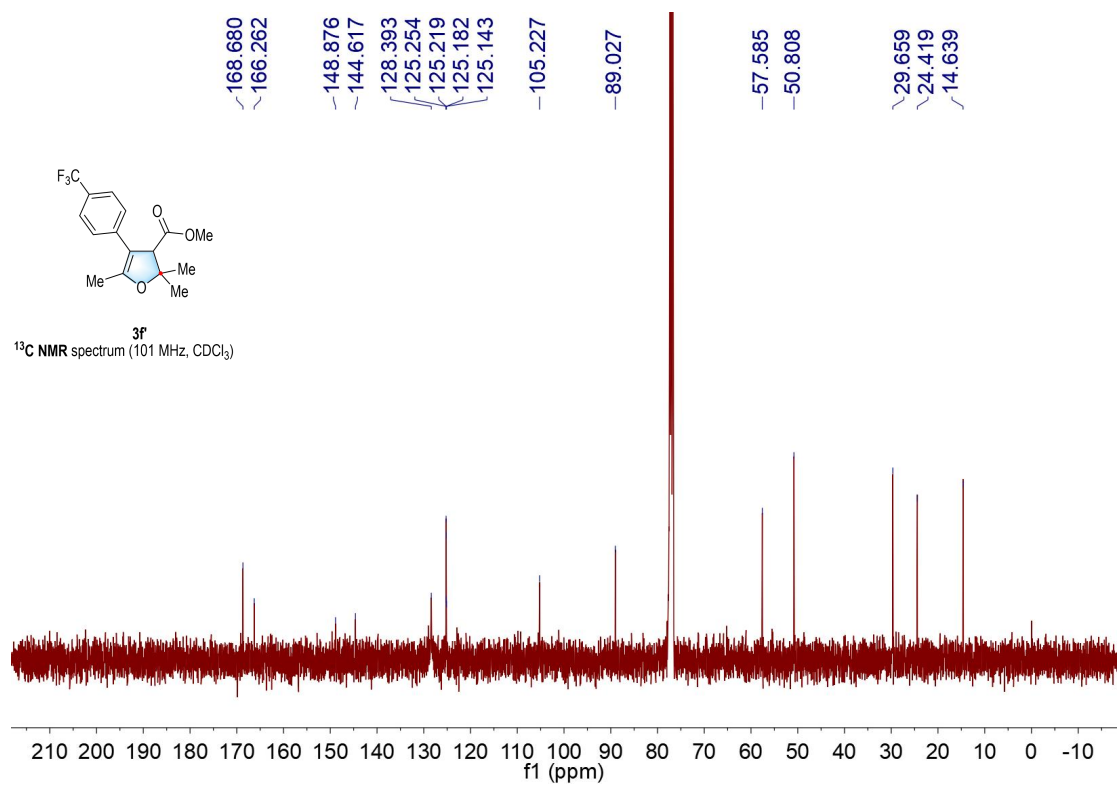

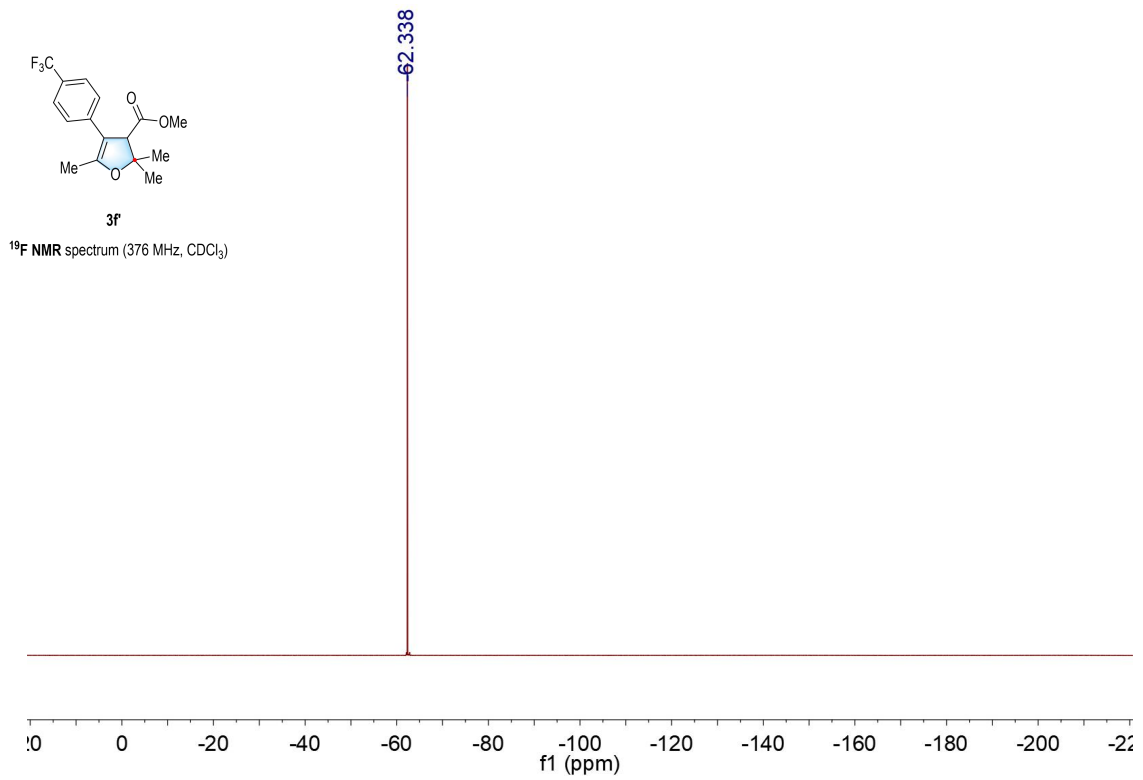

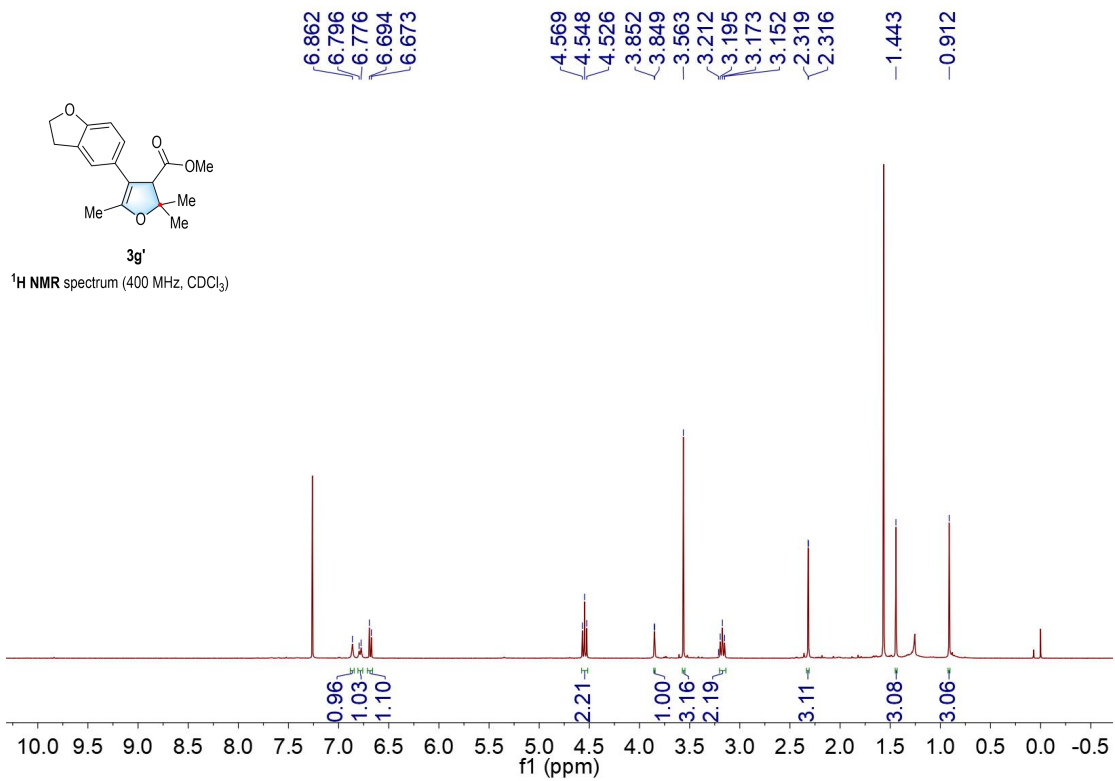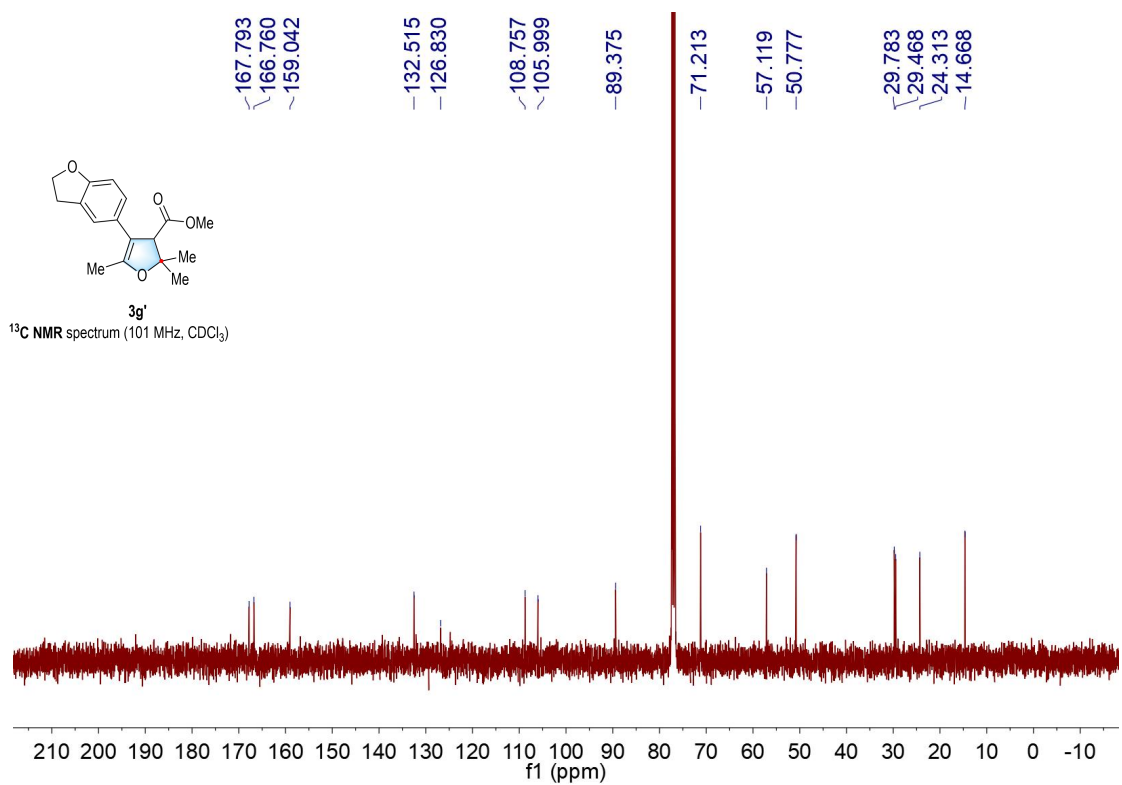

7.820  
7.803  
7.800  
7.783  
7.776  
7.755  
7.519  
7.463  
7.458  
7.452  
7.445  
7.439  
7.432  
7.428  
7.211  
7.209  
7.190  
7.188

-4.100  
-3.497  
-2.387  
-1.526  
-0.916

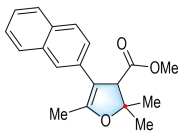

3h'

<sup>1</sup>H NMR spectrum (400 MHz, CDCl<sub>3</sub>)

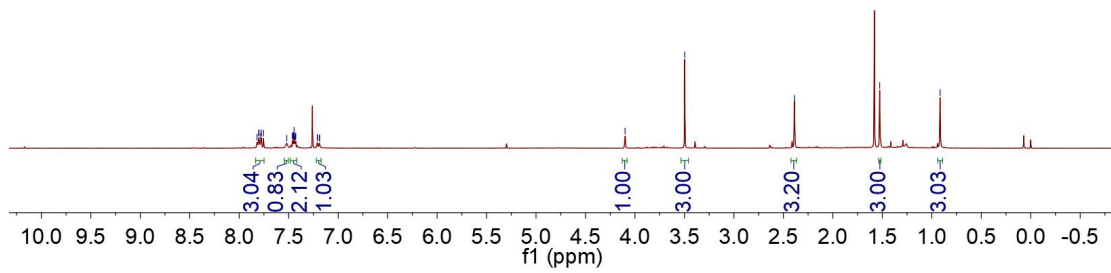

168.412  
166.679  
138.080  
133.416  
132.709  
127.836  
127.787  
127.610  
125.901  
125.462  
105.609  
89.384  
57.813  
50.755  
29.705  
24.462  
14.686

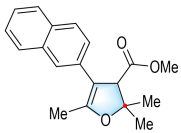

3h'

<sup>13</sup>C NMR spectrum (101 MHz, CDCl<sub>3</sub>)

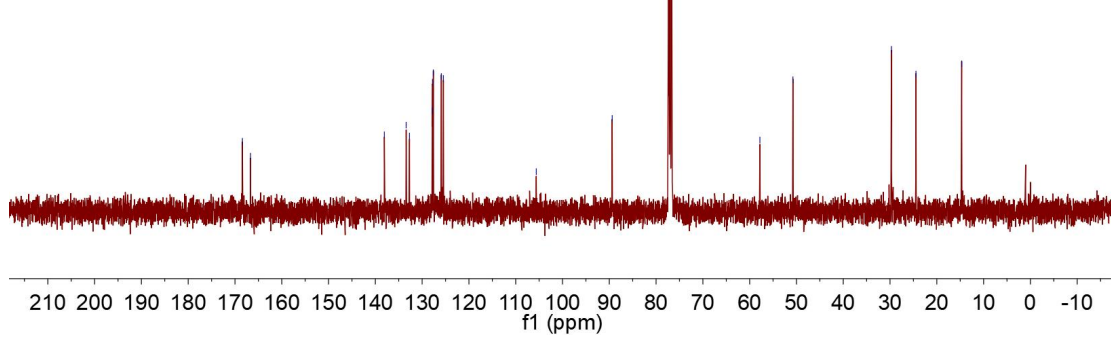

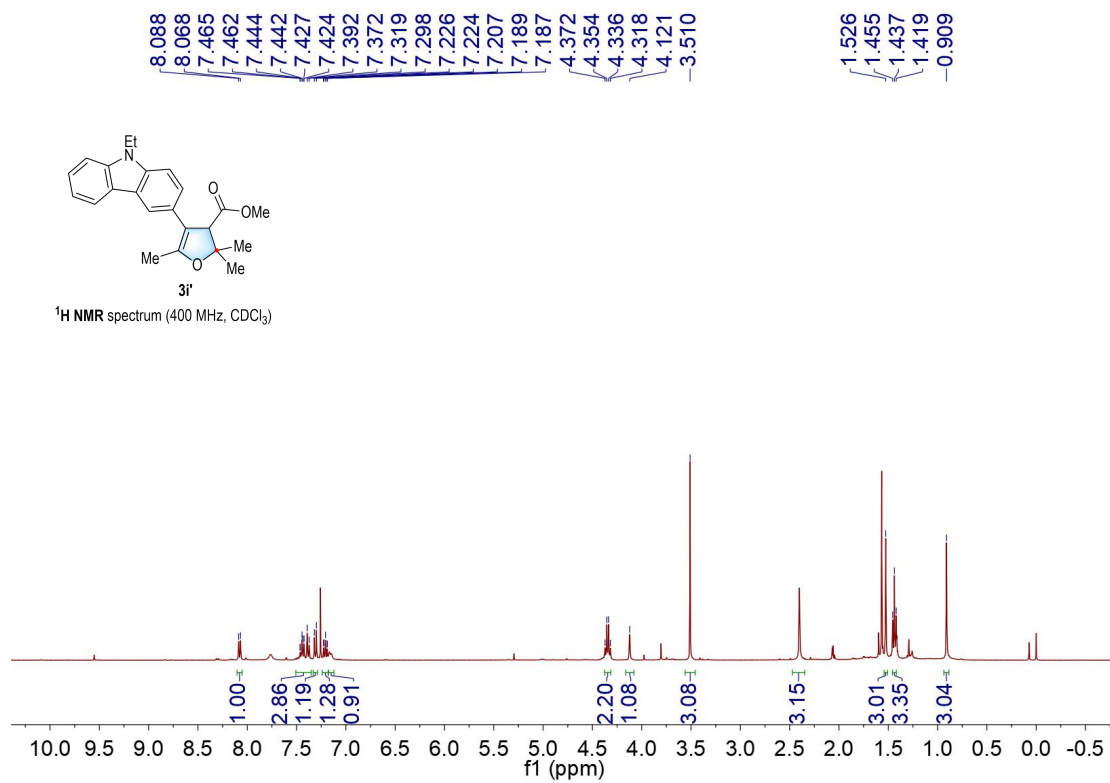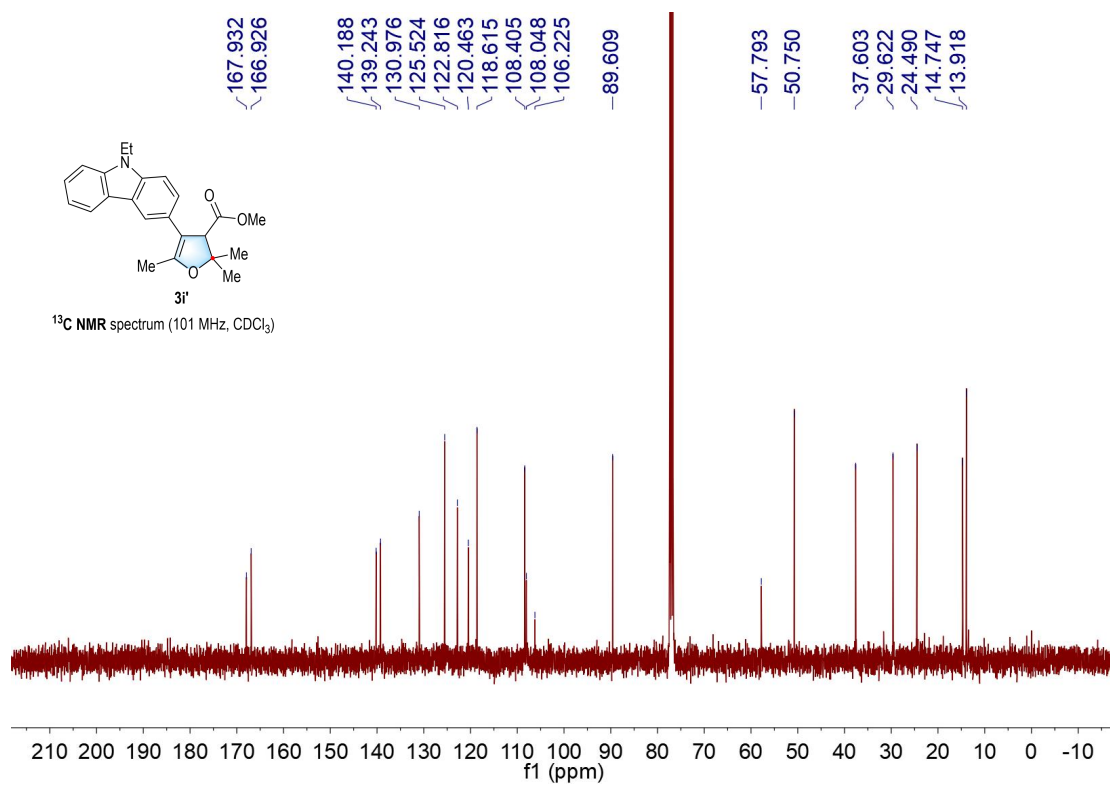

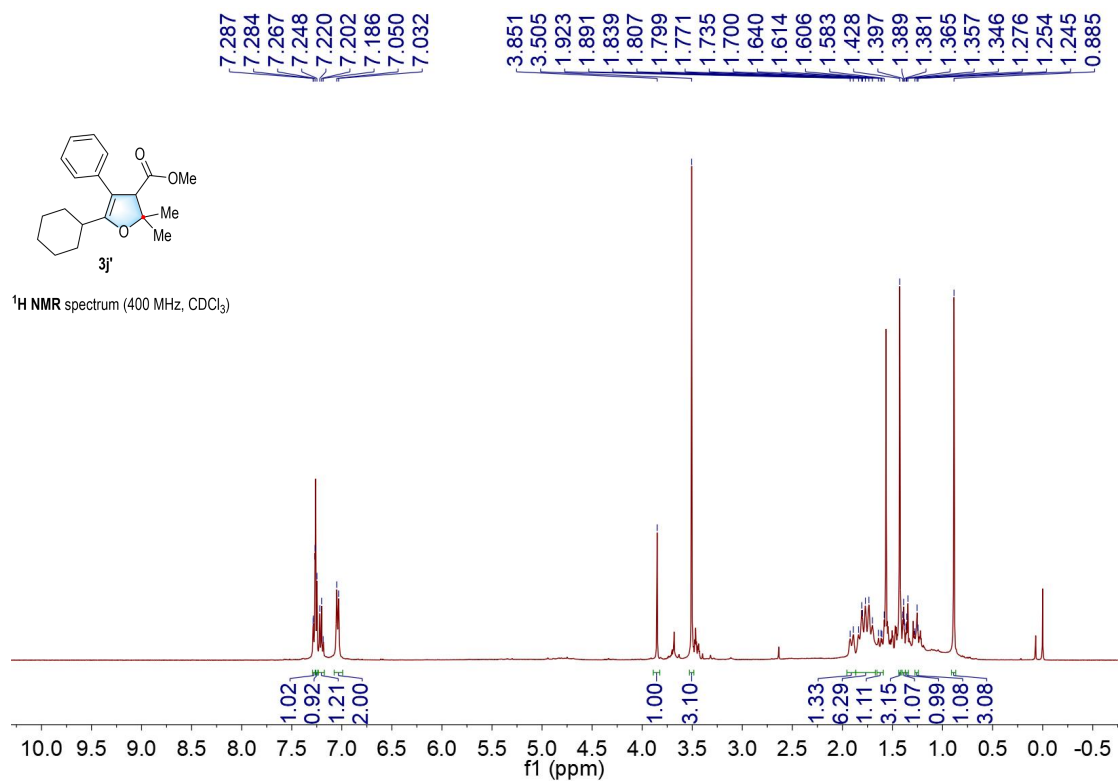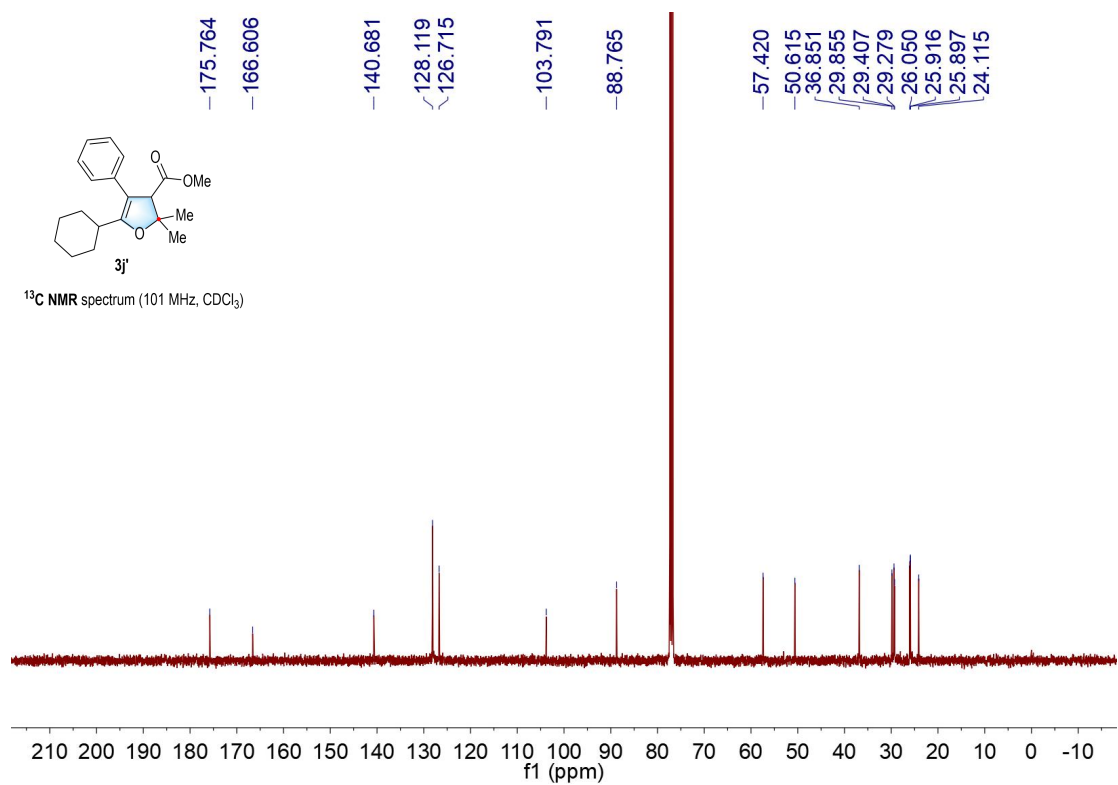

7.868  
7.865  
7.850  
7.845  
7.484  
7.464  
7.451  
7.433  
7.419  
7.339  
7.322  
7.303  
7.269  
7.260  
7.252  
7.193  
7.191  
7.173

-4.112

-3.495

-1.610

-1.007

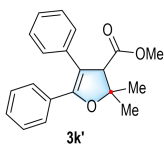

<sup>1</sup>H NMR spectrum (400 MHz, CDCl<sub>3</sub>)

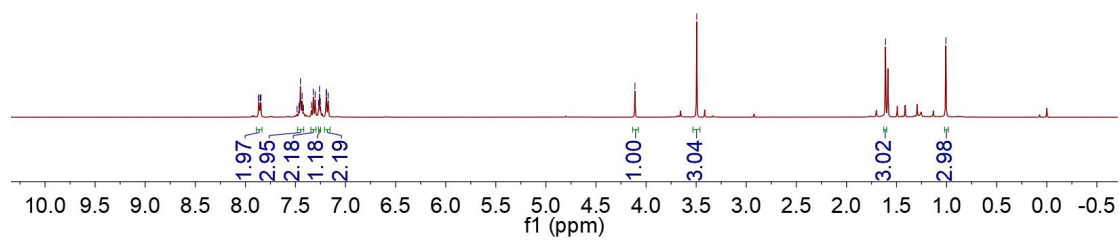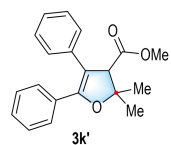

<sup>13</sup>C NMR spectrum (101 MHz, CDCl<sub>3</sub>)

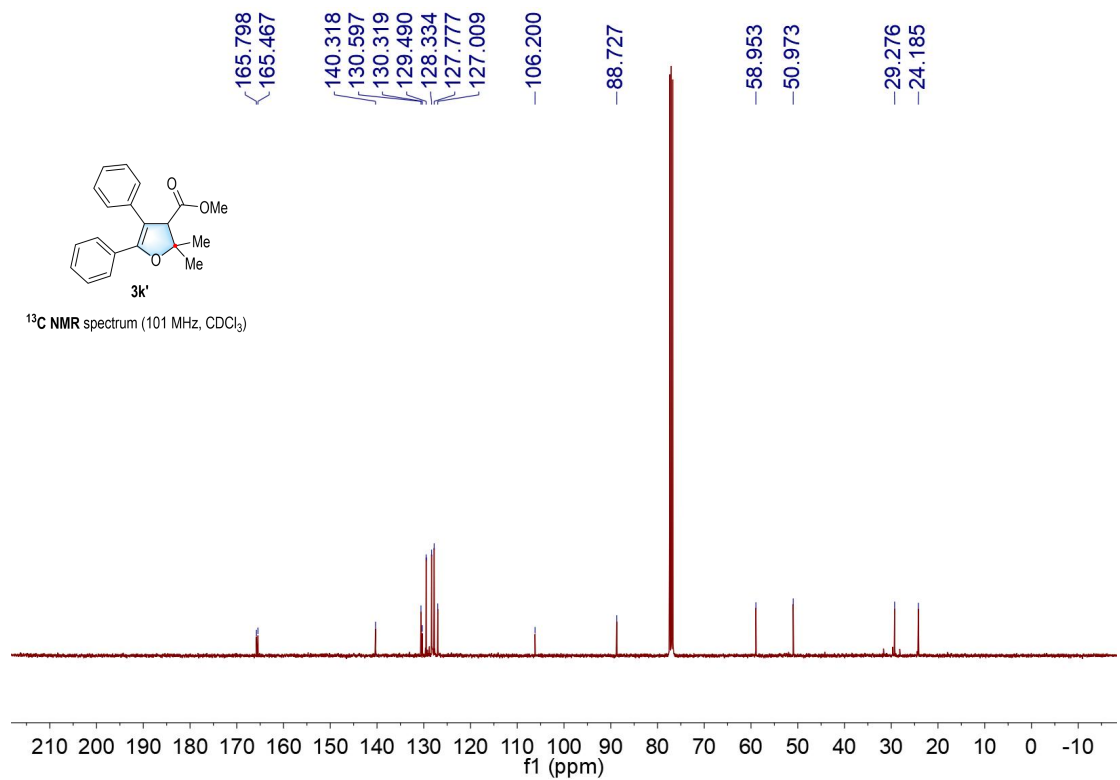

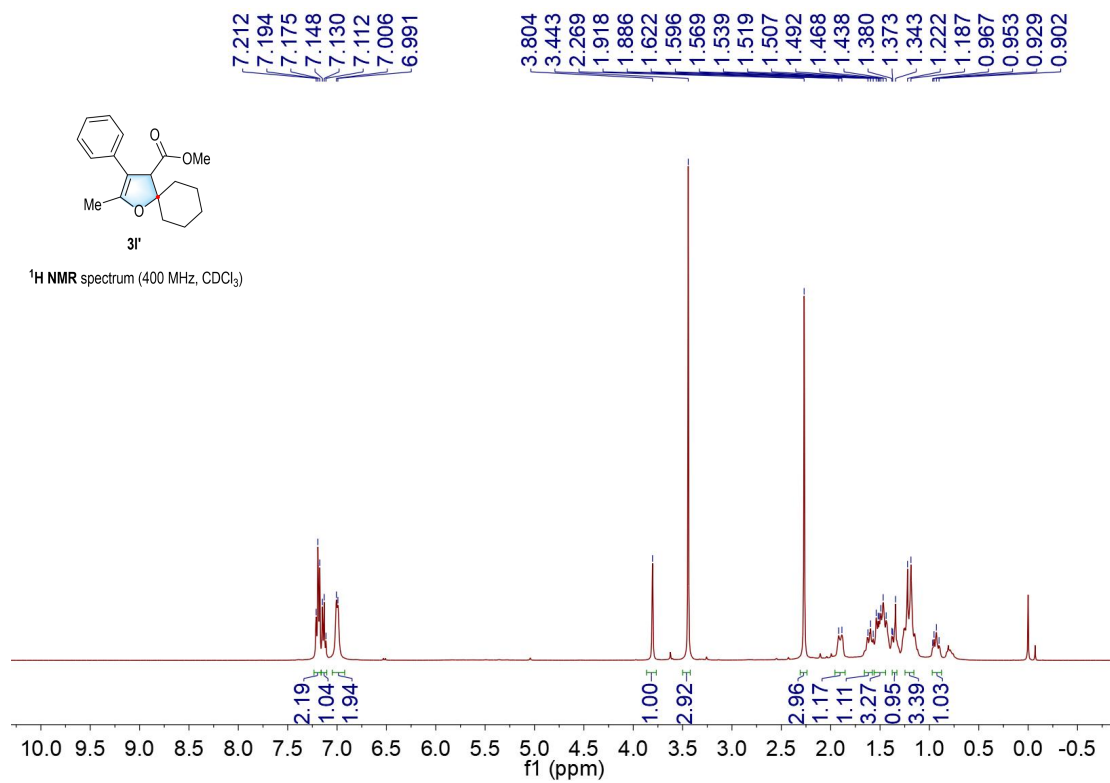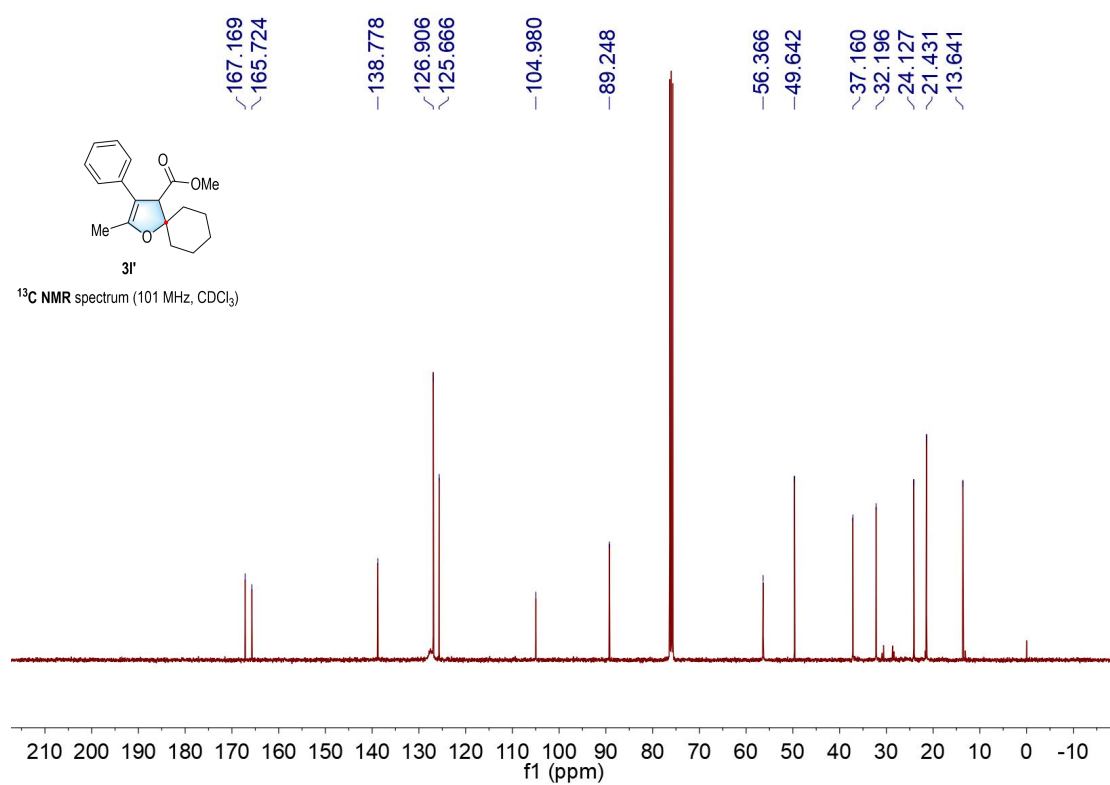

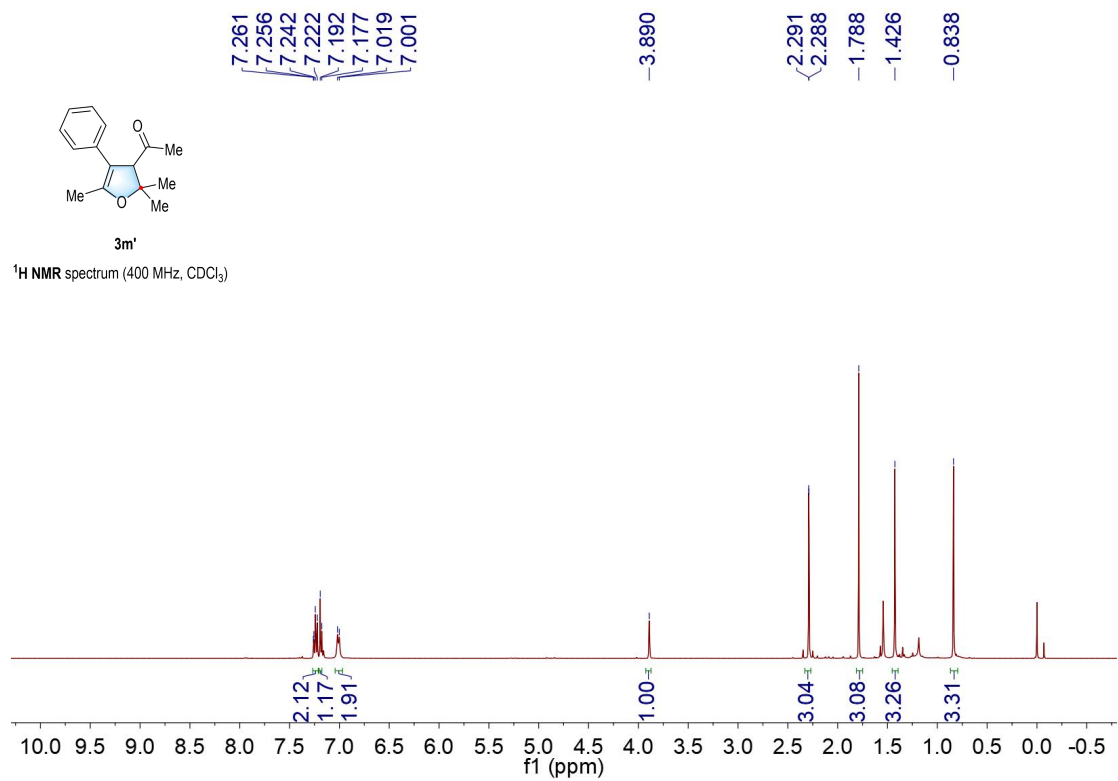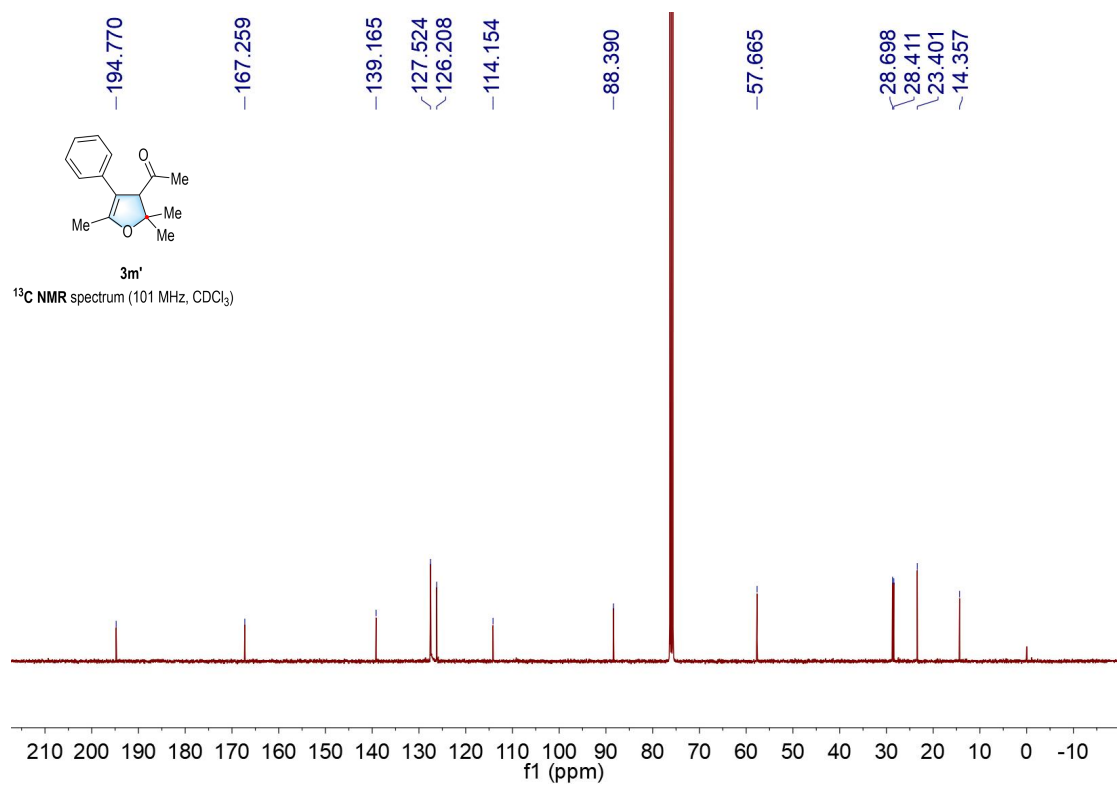

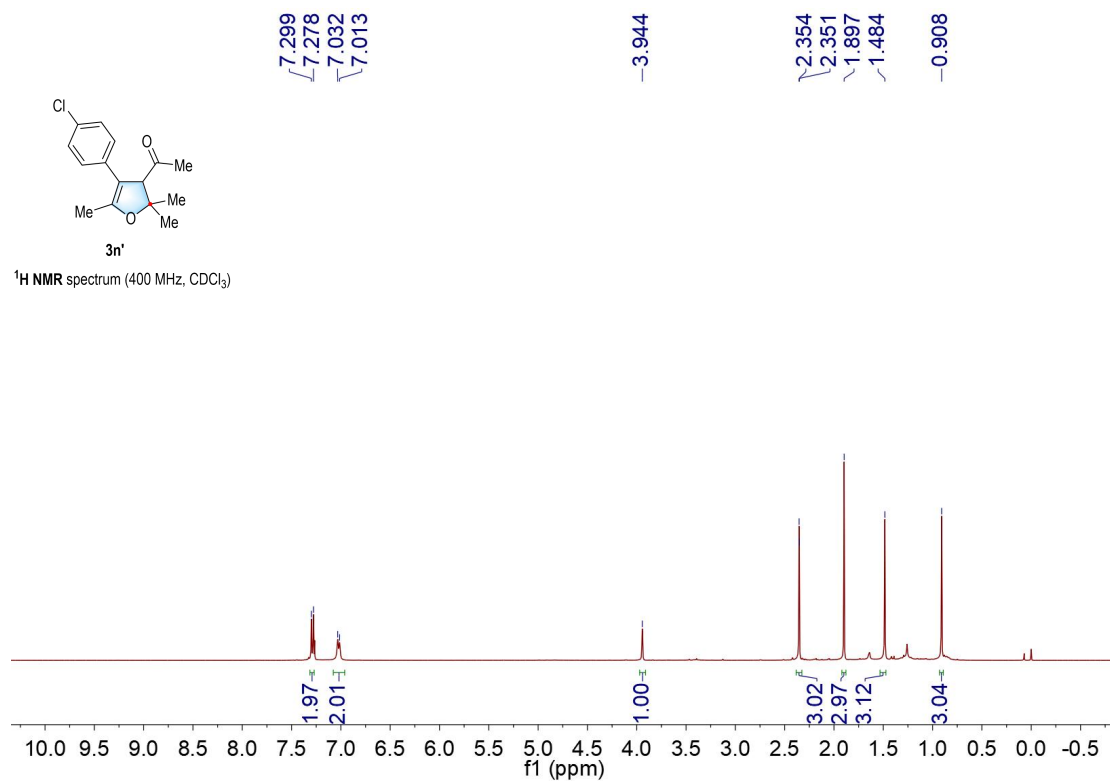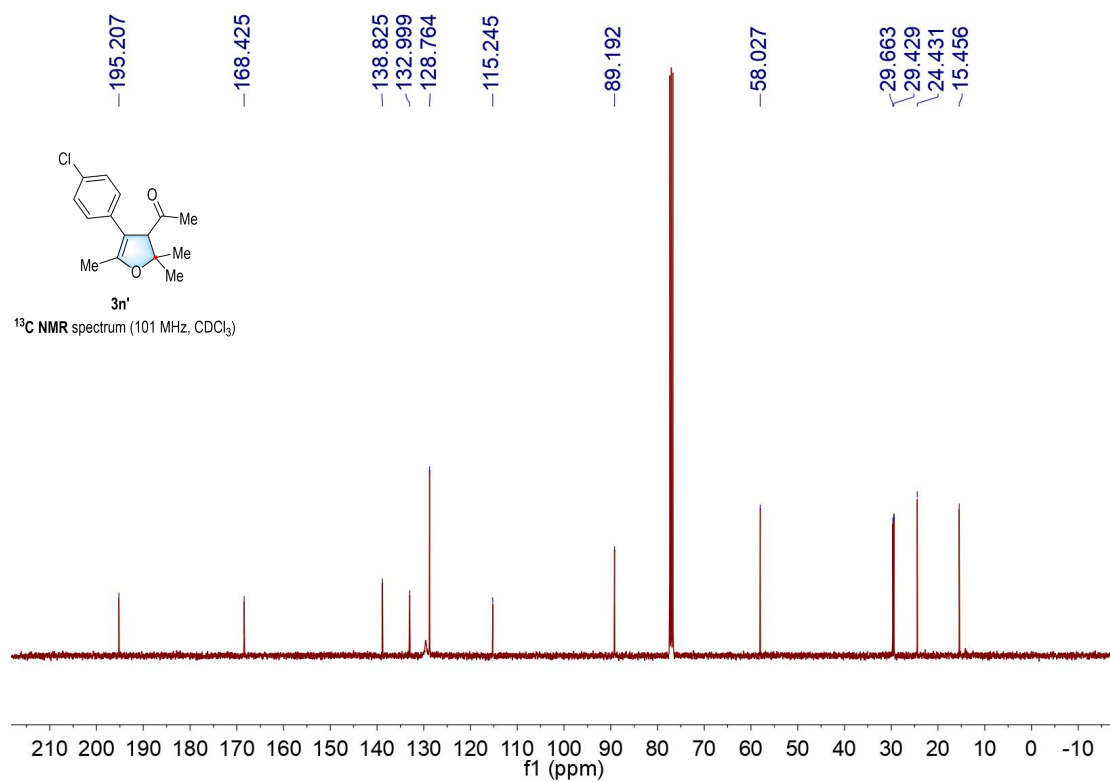

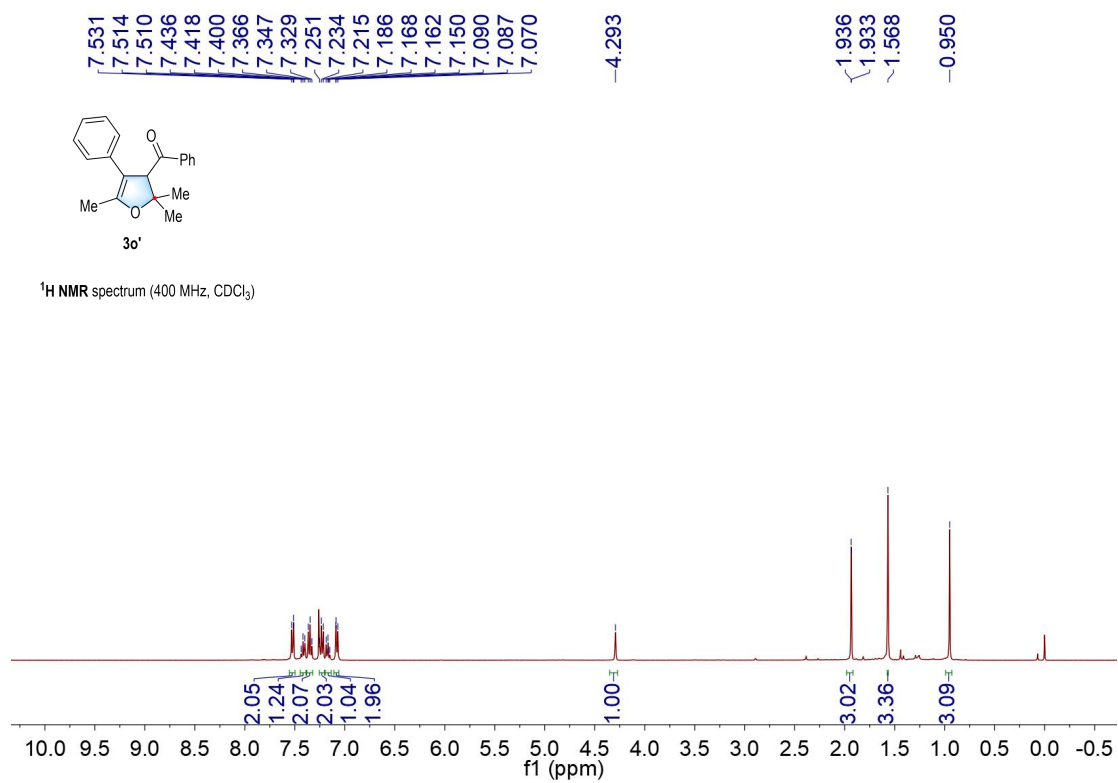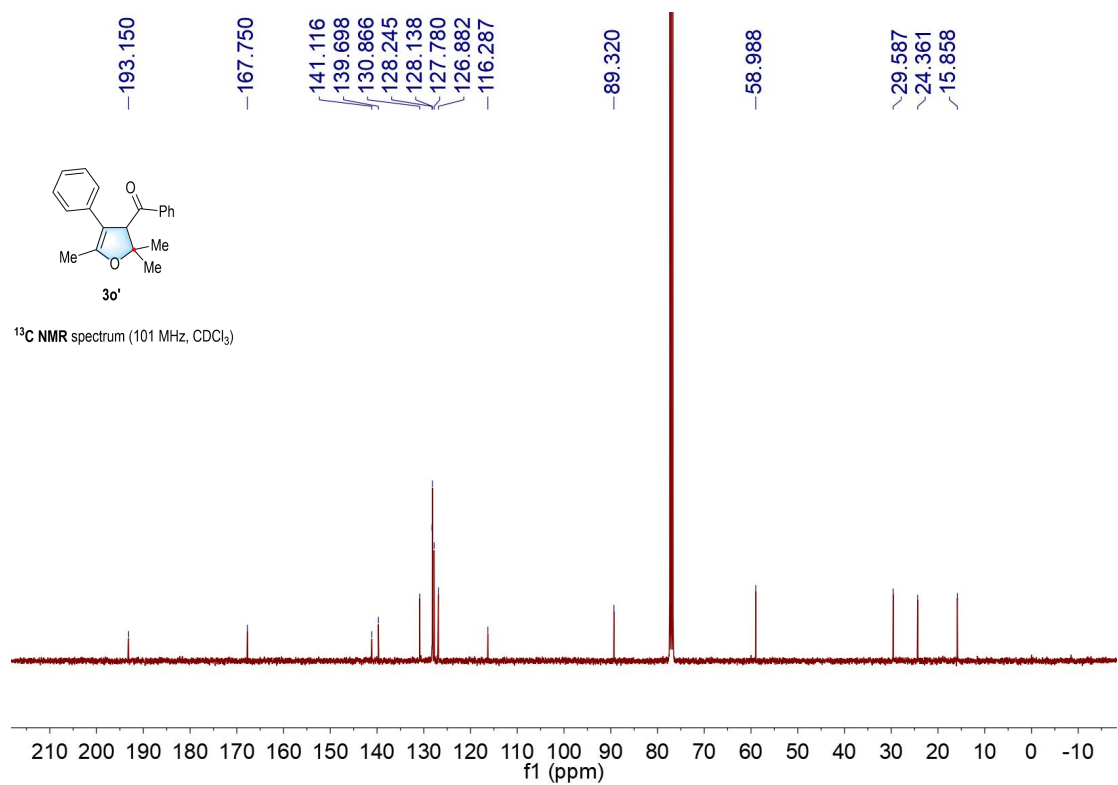

8.015  
8.012  
7.995  
7.991  
7.606  
7.603  
7.600  
7.590  
7.585  
7.579  
7.569  
7.566  
7.563  
7.524  
7.521  
7.508  
7.505  
7.487  
7.484  
7.316  
7.314  
7.298  
7.295  
7.277  
7.237  
7.220  
7.200  
3.134  
3.119  
2.926  
2.911  
1.279  
1.135

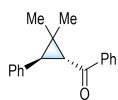

4a

<sup>1</sup>H NMR spectrum (400 MHz, CDCl<sub>3</sub>)

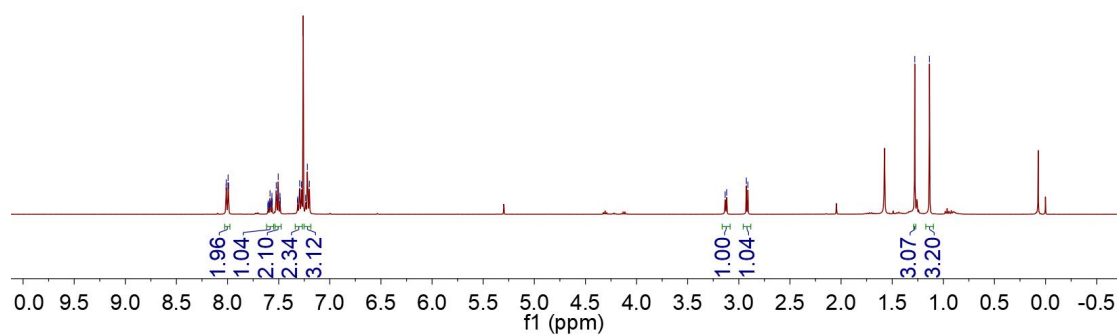

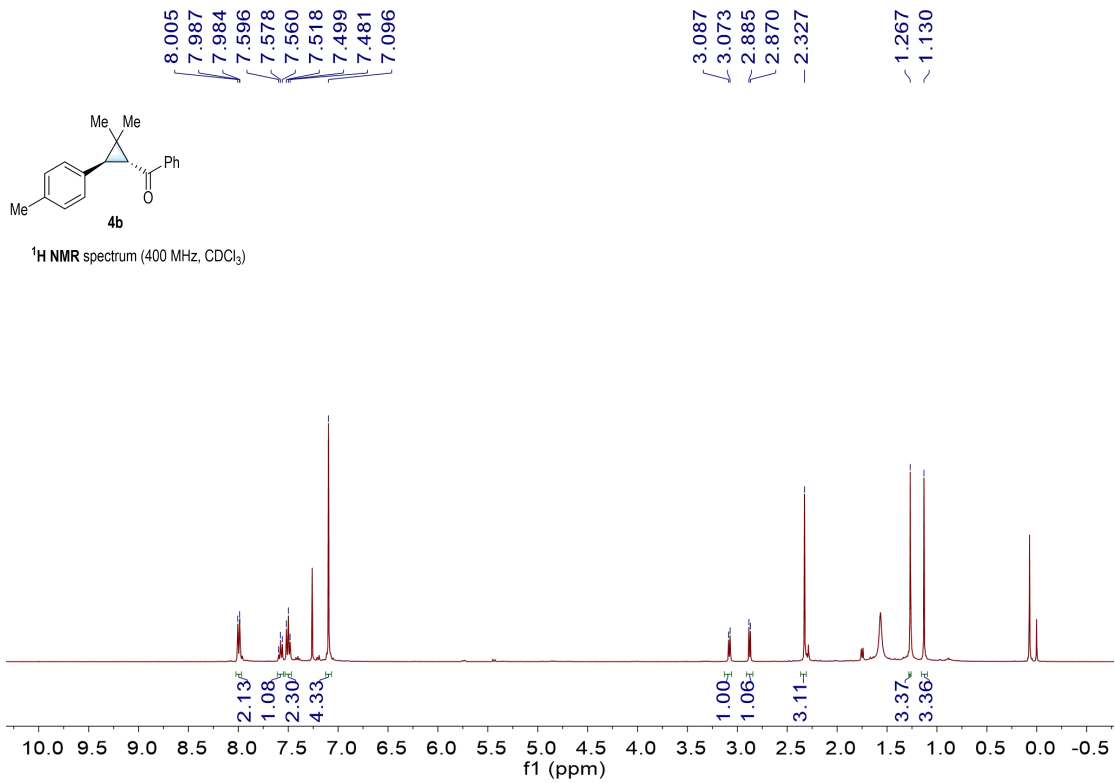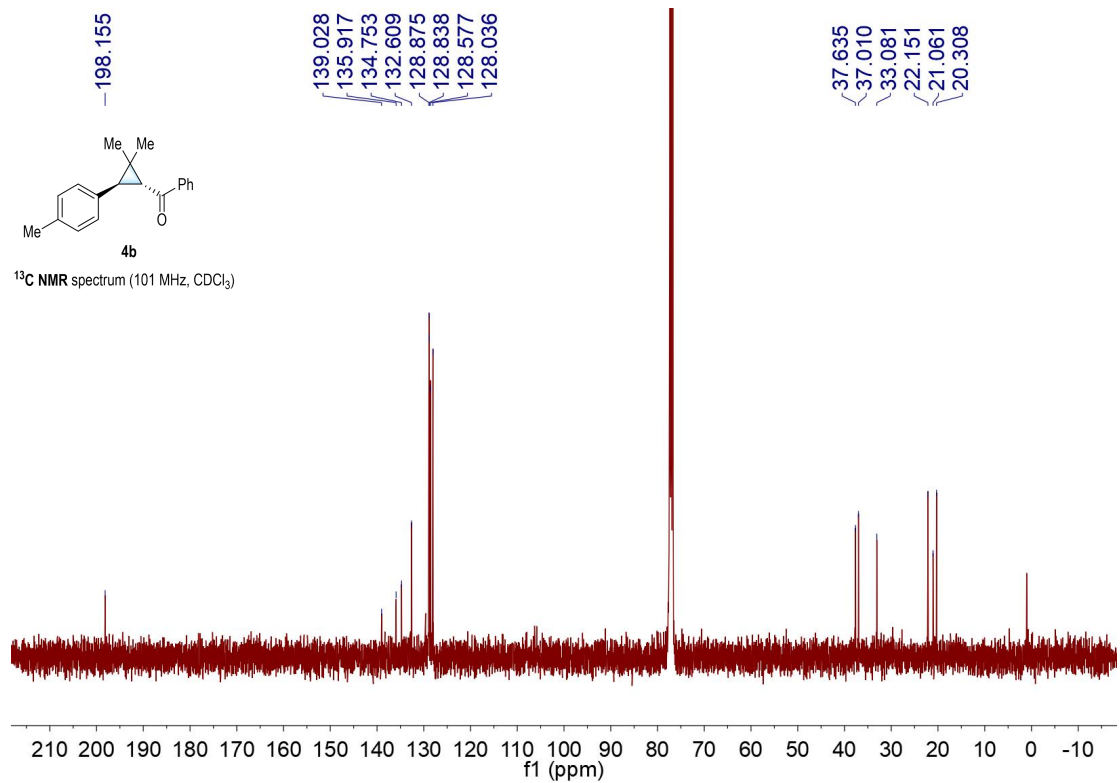

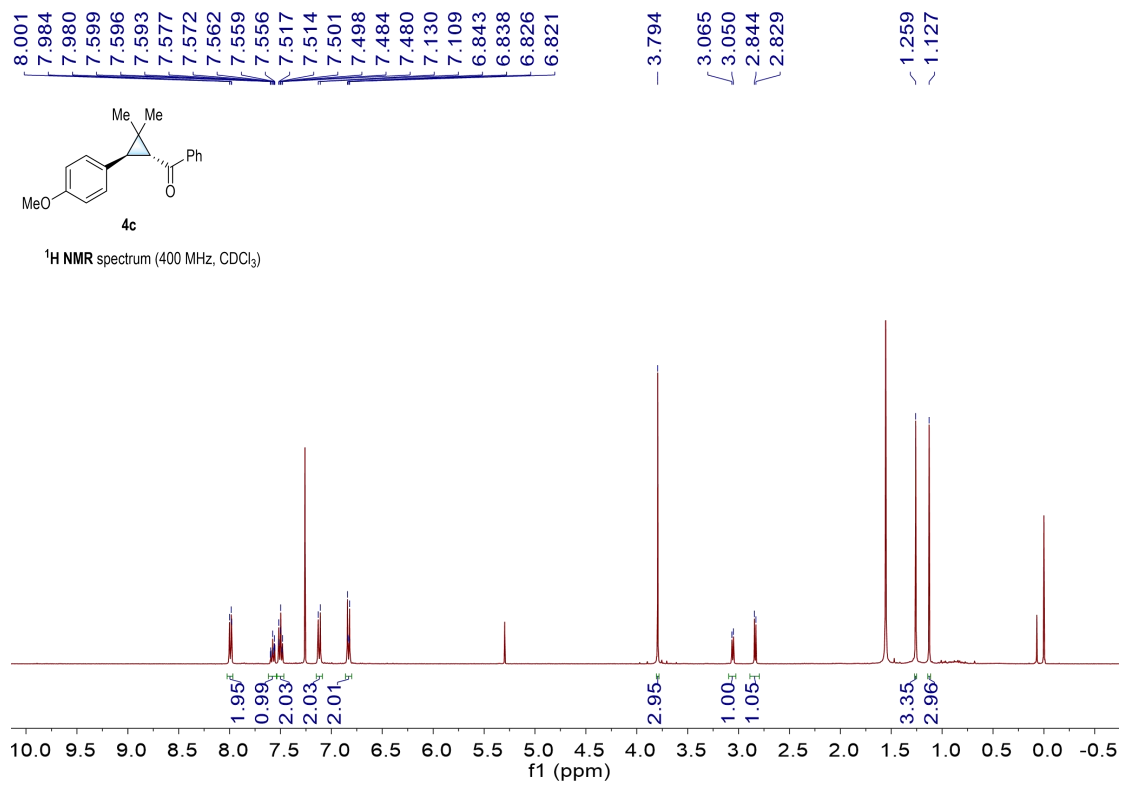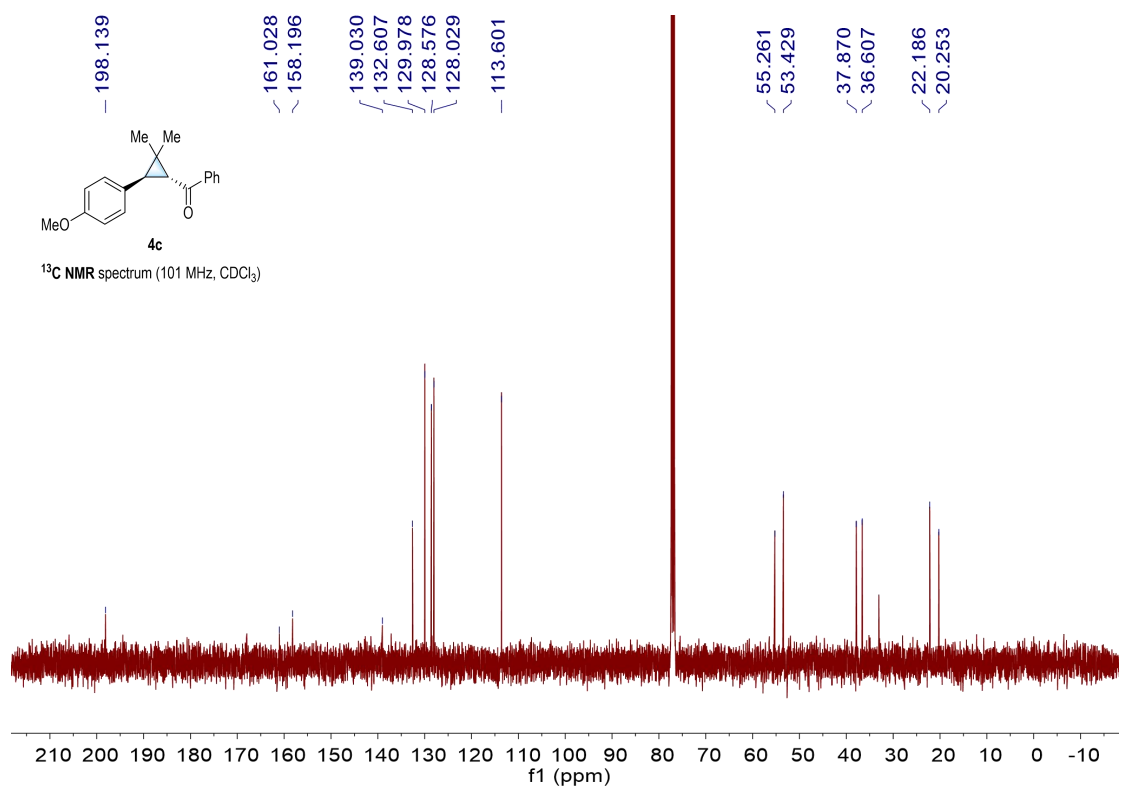

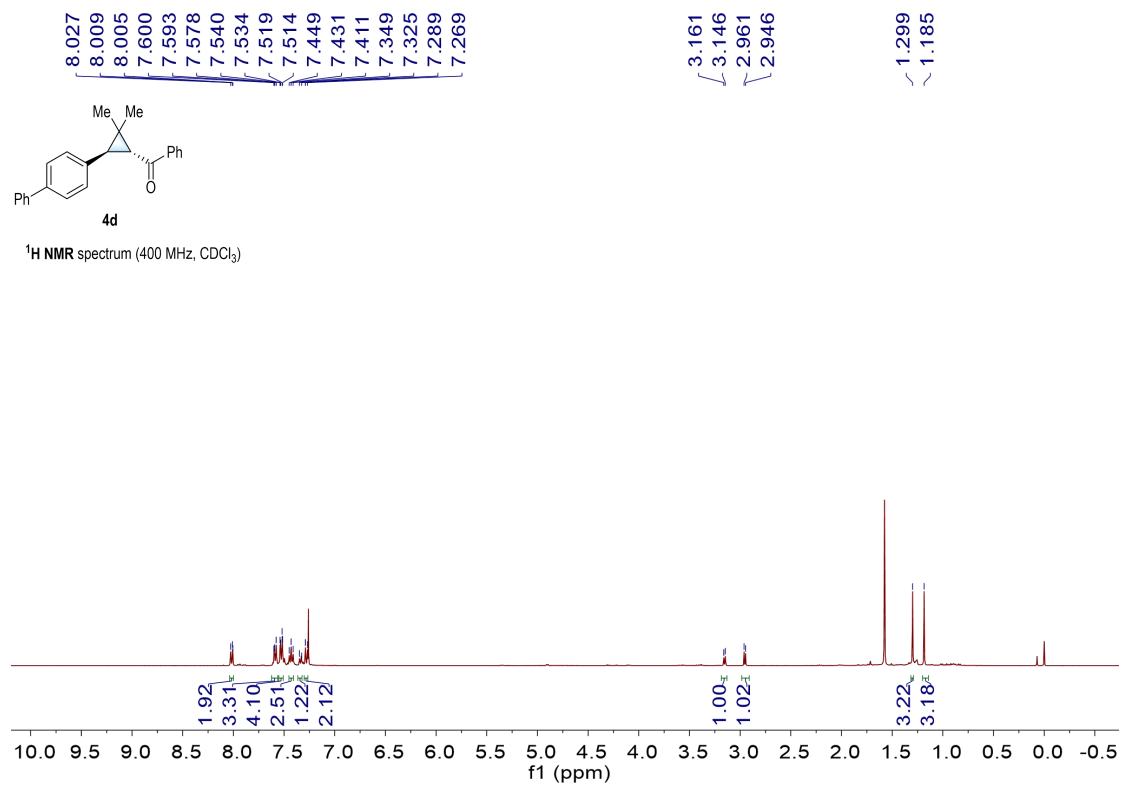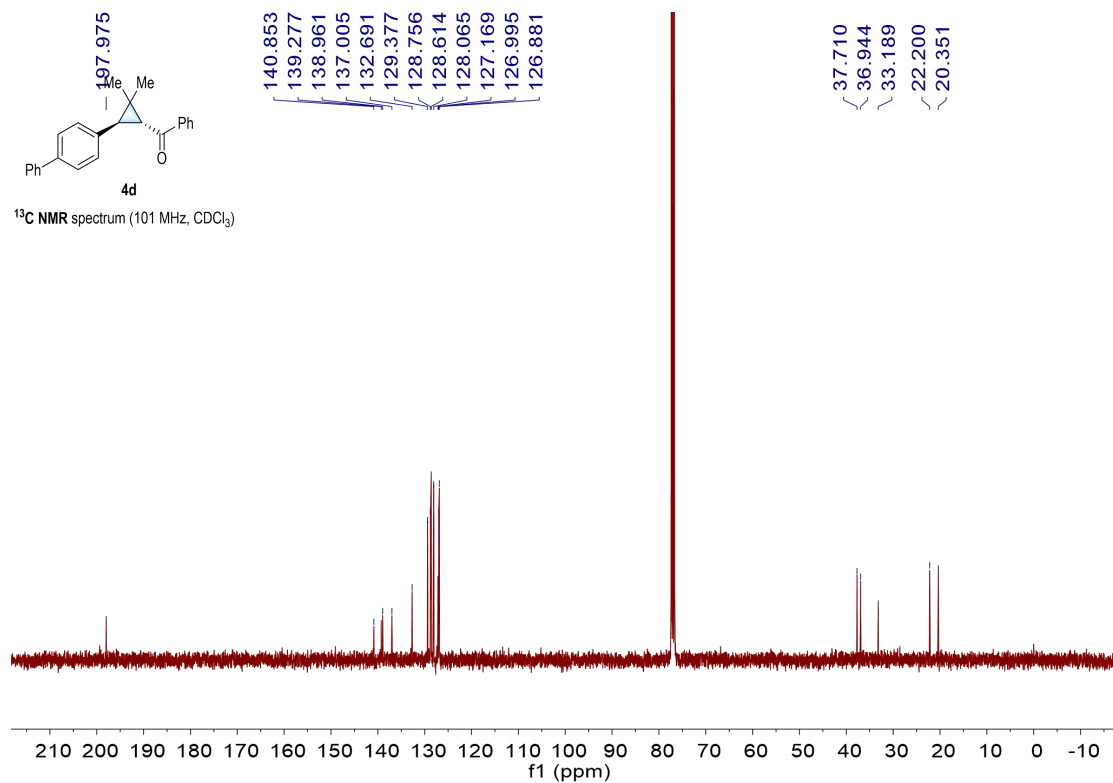

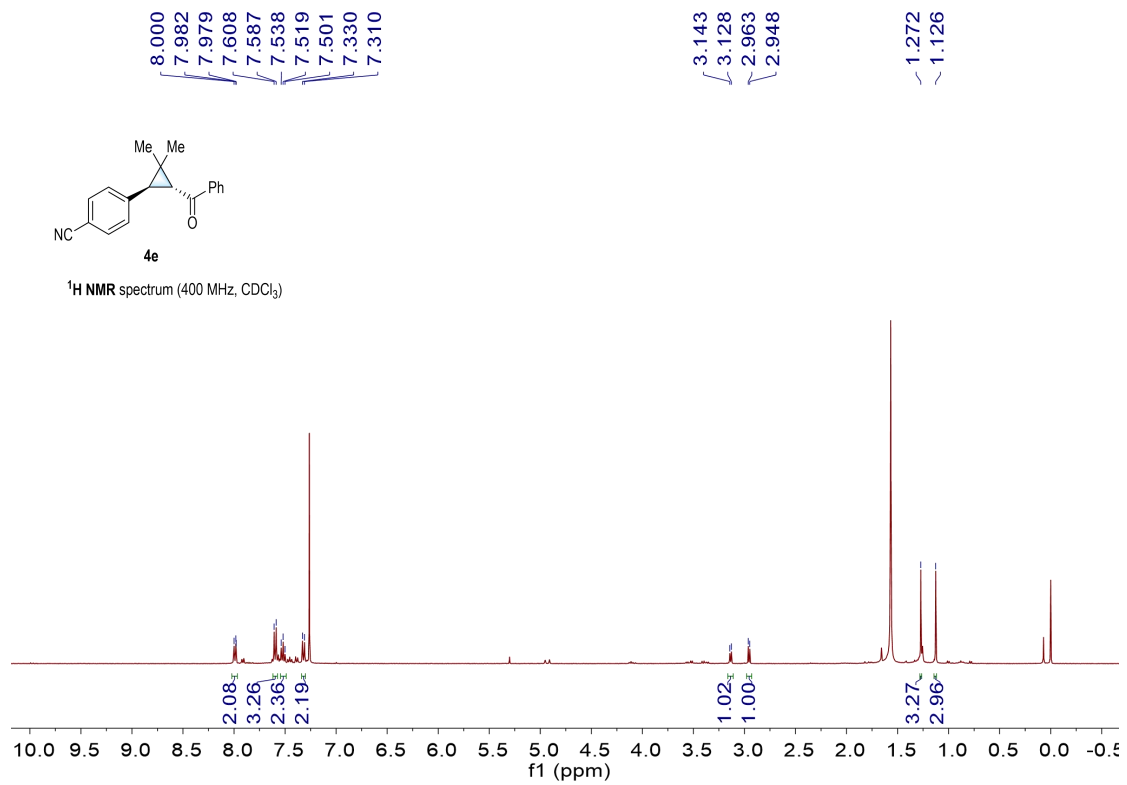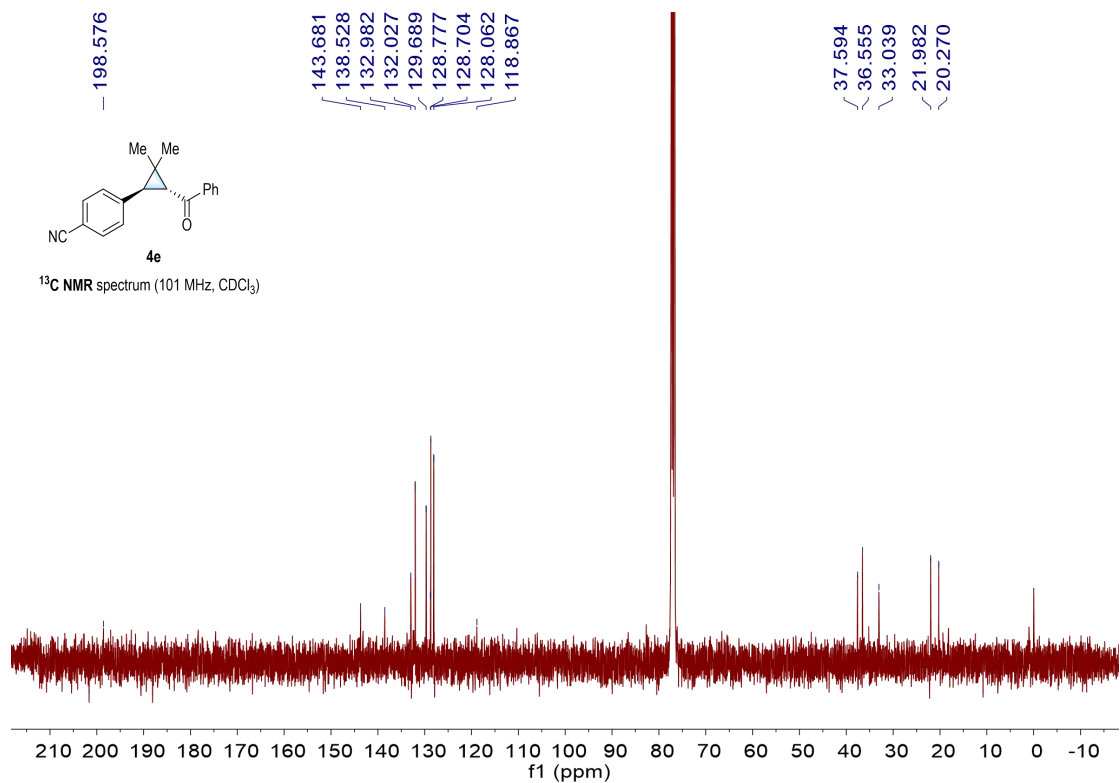

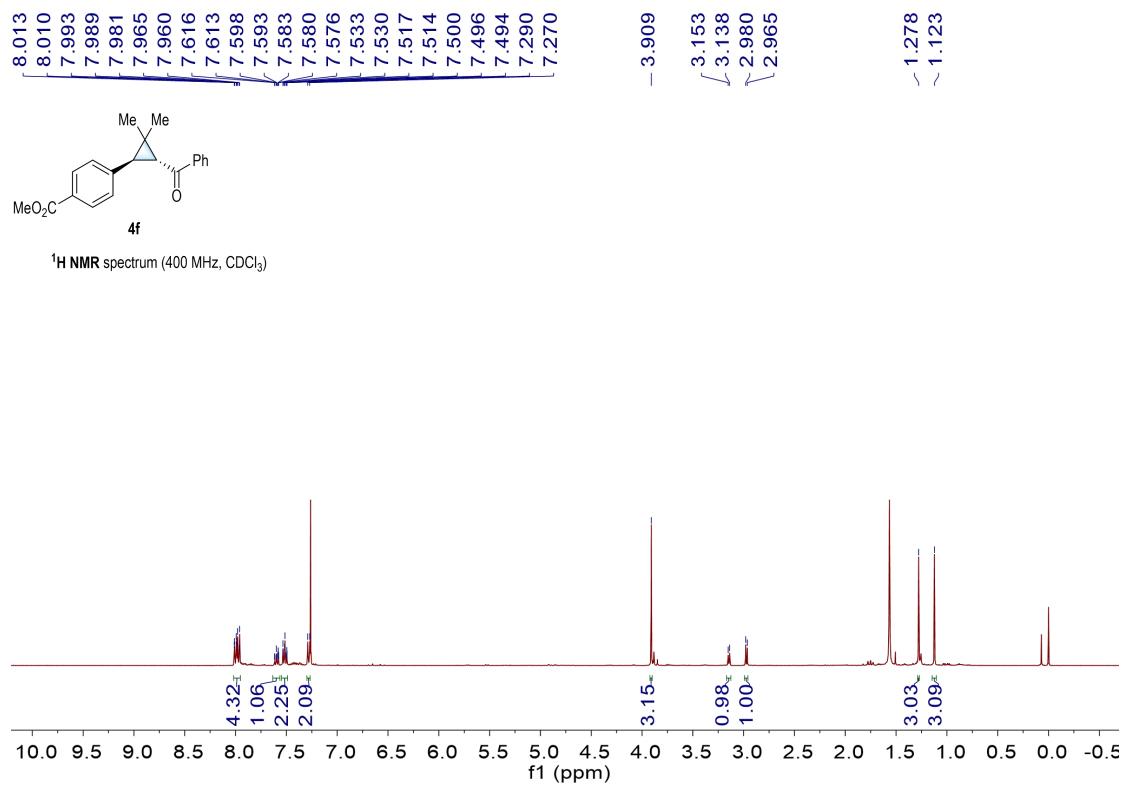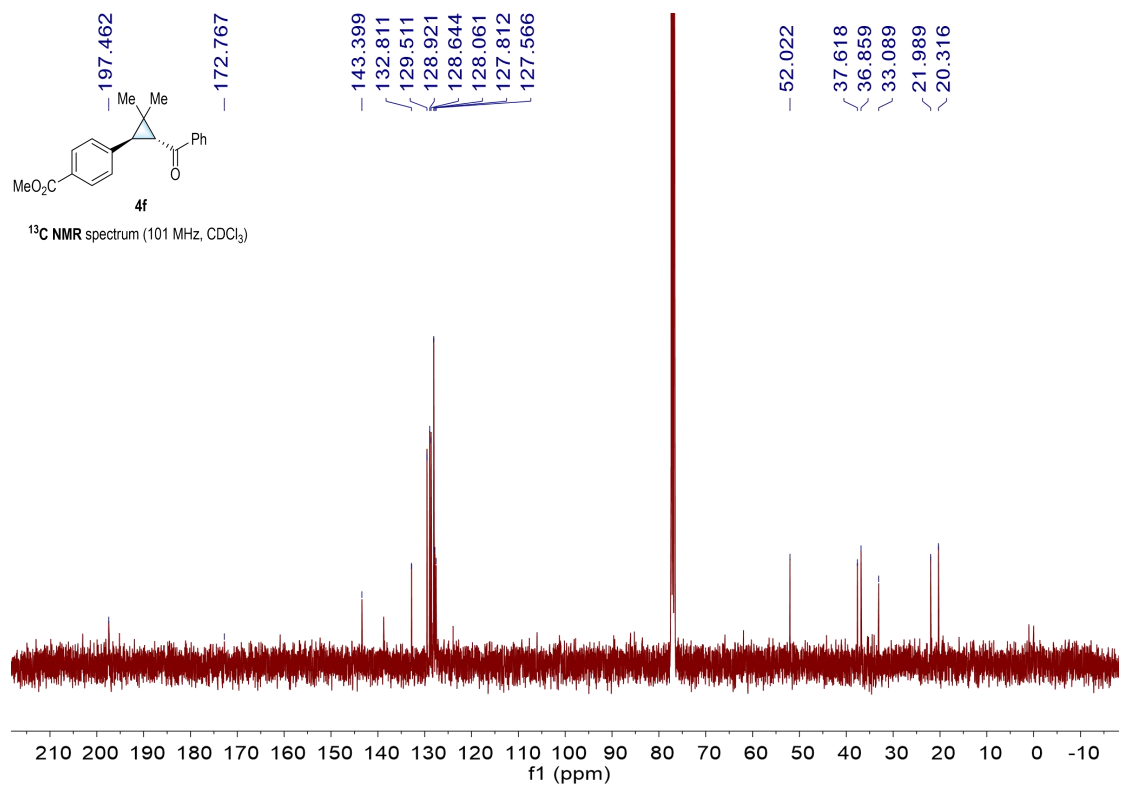

8.018  
8.000  
7.997  
7.611  
7.598  
7.593  
7.581  
7.530  
7.514  
7.511  
7.493  
7.242  
7.221  
7.205  
7.202  
7.128  
7.107  
7.087  
7.084

3.099  
3.084  
2.909  
2.893

1.351  
1.097

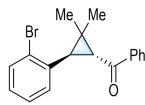

4g

<sup>1</sup>H NMR spectrum (400 MHz, CDCl<sub>3</sub>)

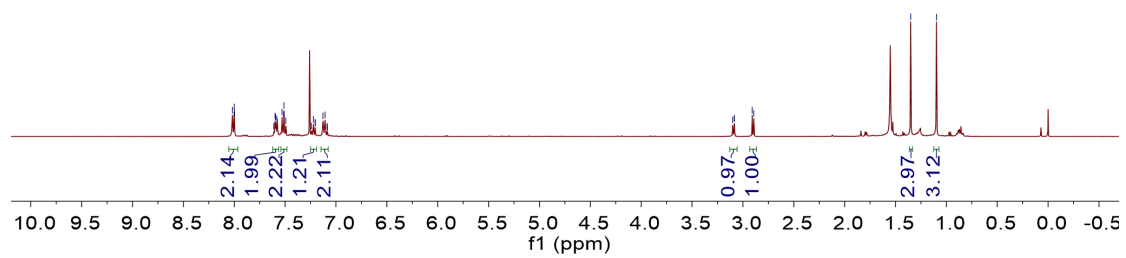

197.555

138.824  
132.746  
132.535  
129.965  
128.698  
128.628  
128.601  
128.152  
128.070  
127.077

38.374  
37.324  
33.240  
21.694  
19.709

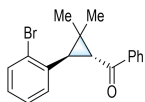

4g

<sup>13</sup>C NMR spectrum (101 MHz, CDCl<sub>3</sub>)

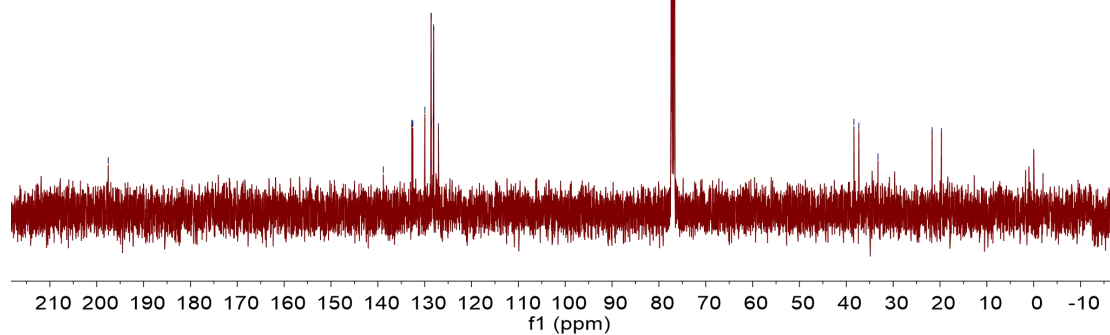

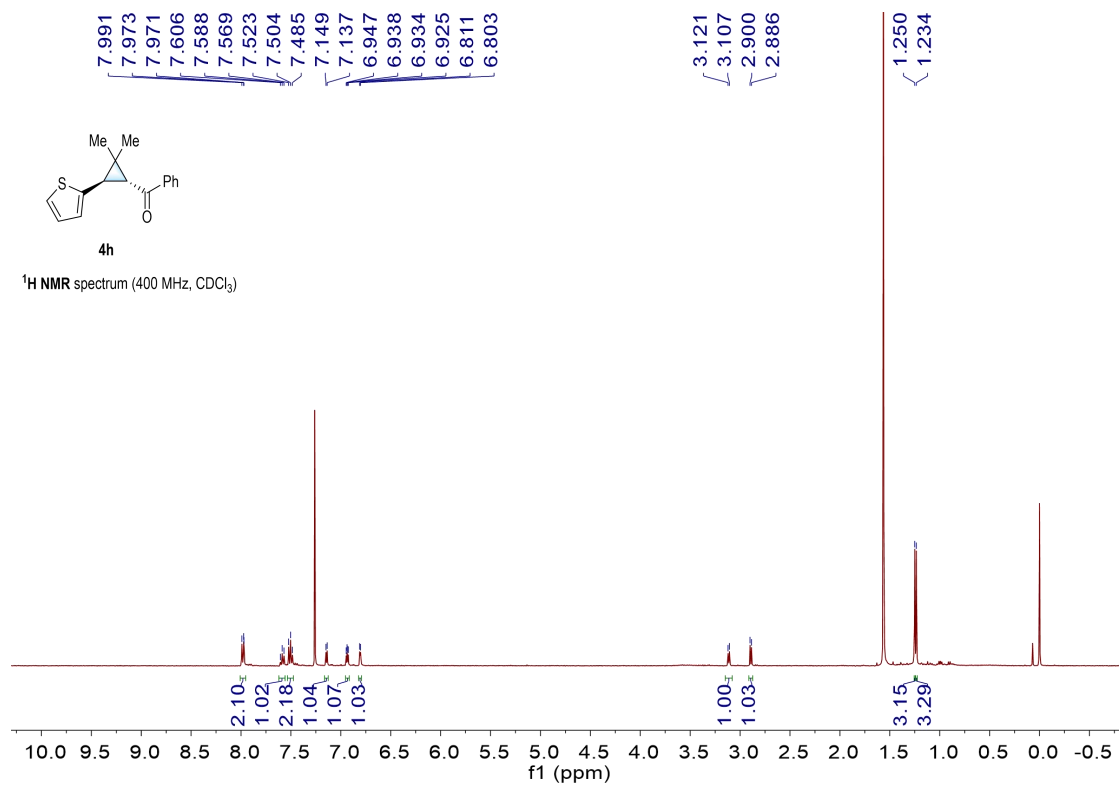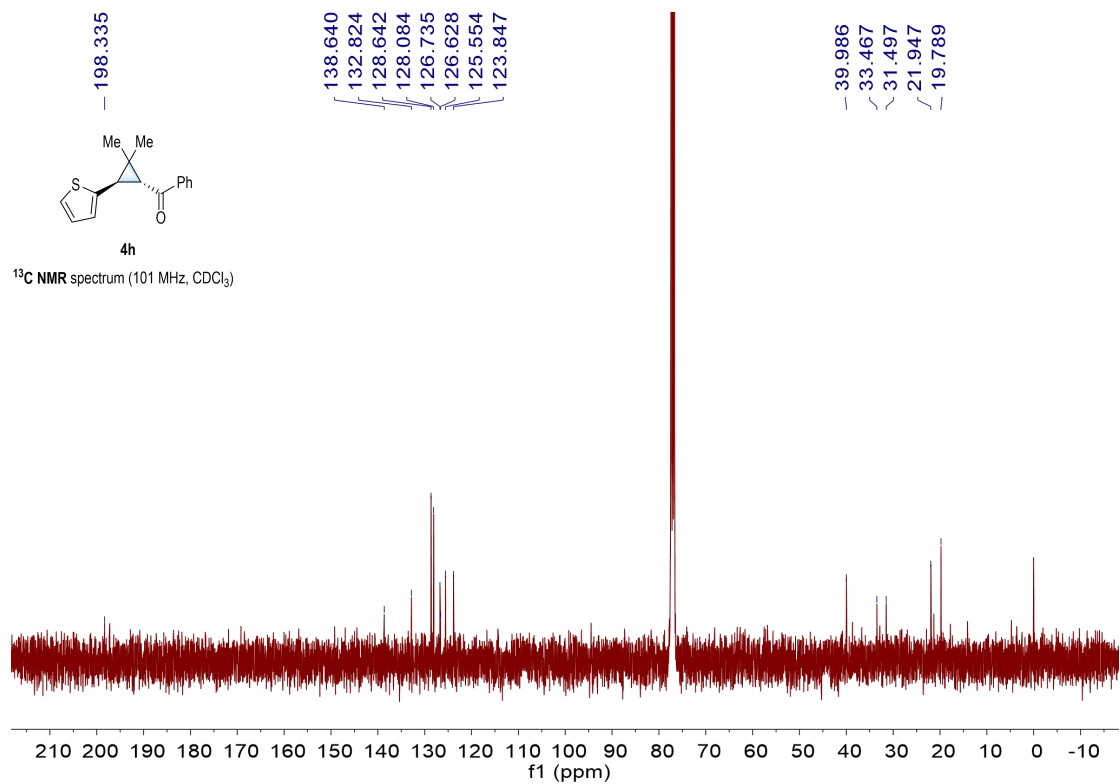

7.989  
7.971  
7.968  
7.598  
7.579  
7.564  
7.561  
7.517  
7.498  
7.480  
6.968  
6.965  
6.957

2.992  
2.978  
2.838  
2.824

1.238  
1.194

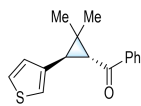

4i

<sup>1</sup>H NMR spectrum (400 MHz, CDCl<sub>3</sub>)

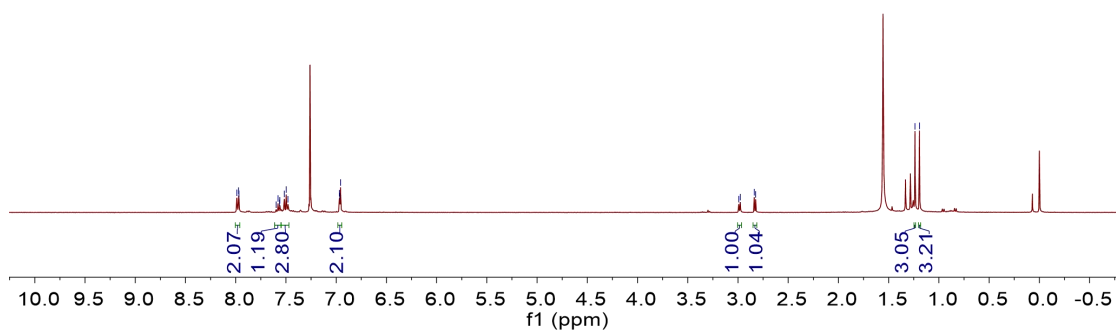

197.723

153.632  
138.989  
132.646  
128.731  
128.578  
128.020  
125.265  
121.401

38.857  
32.804  
32.630  
22.004  
19.990

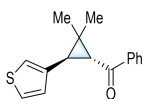

4i

<sup>13</sup>C NMR spectrum (101 MHz, CDCl<sub>3</sub>)

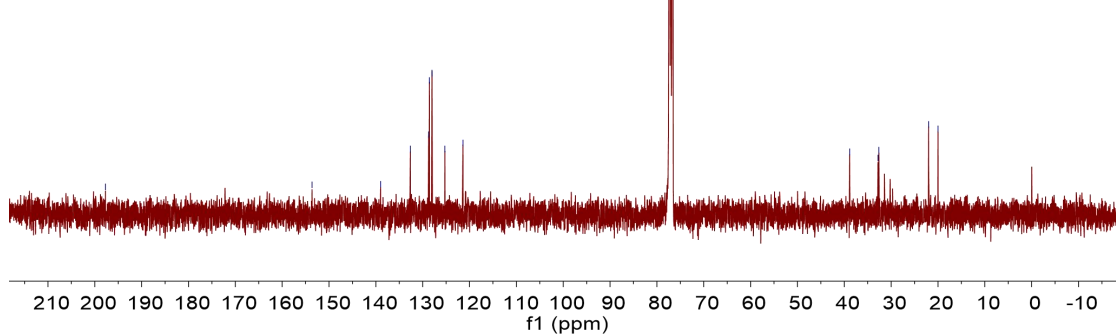

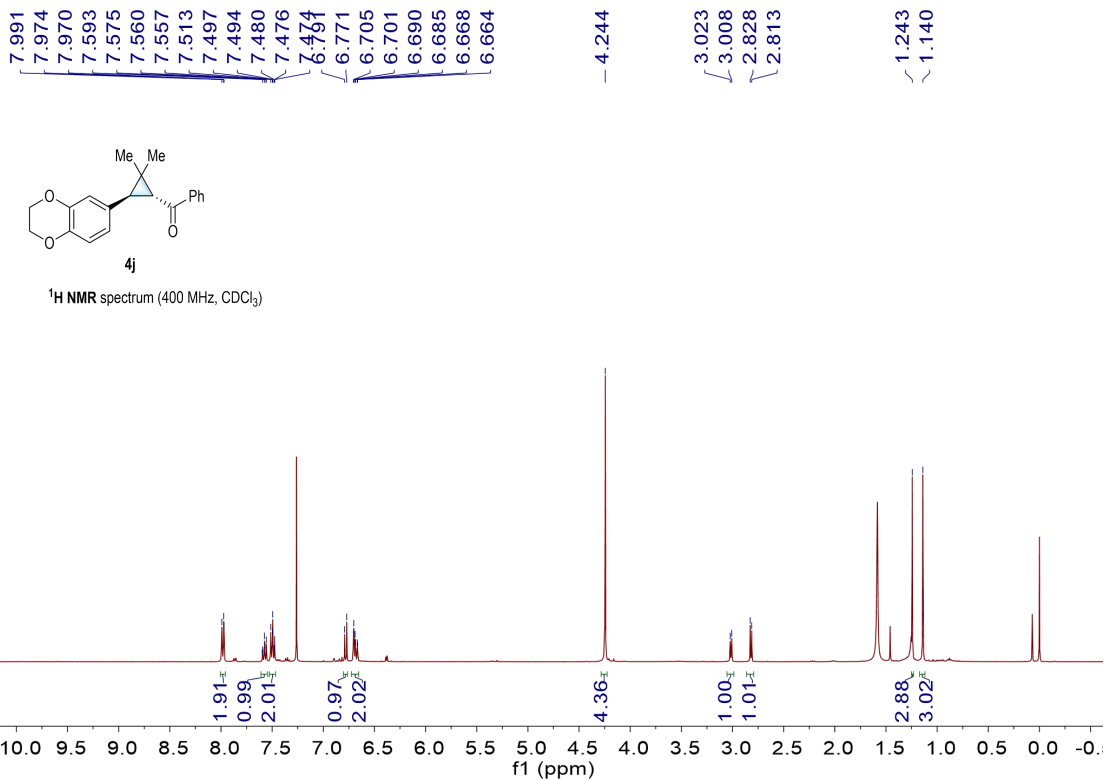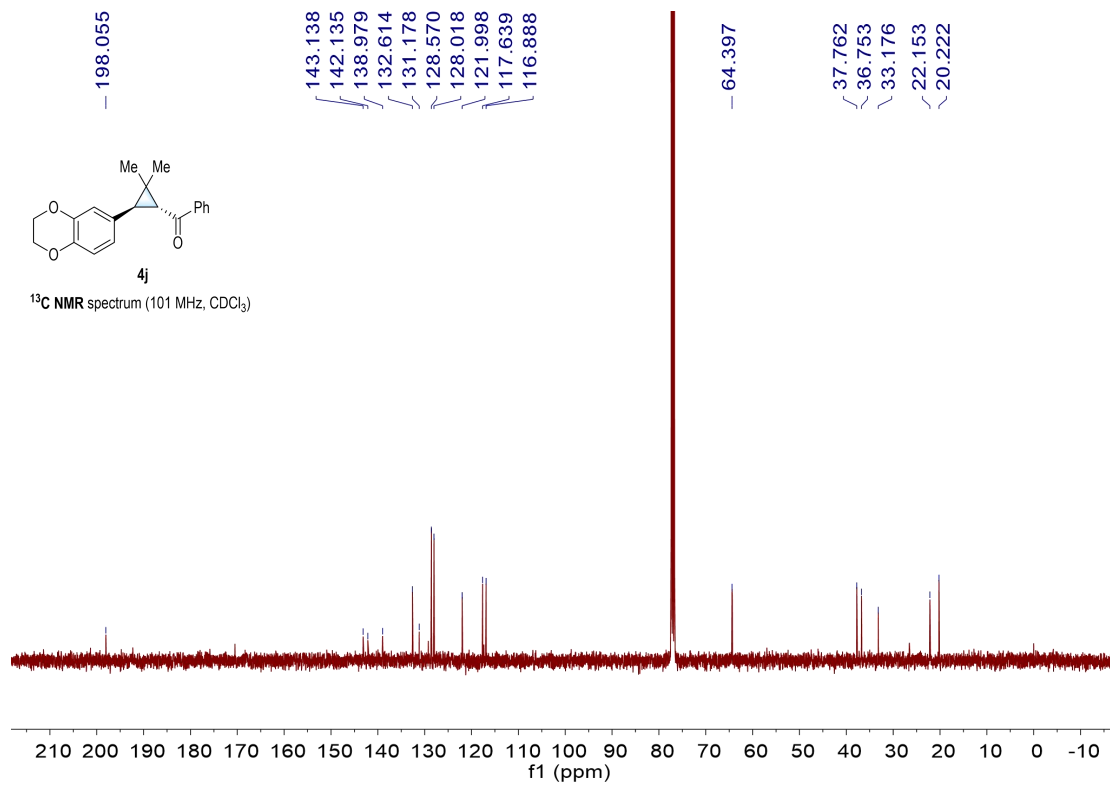

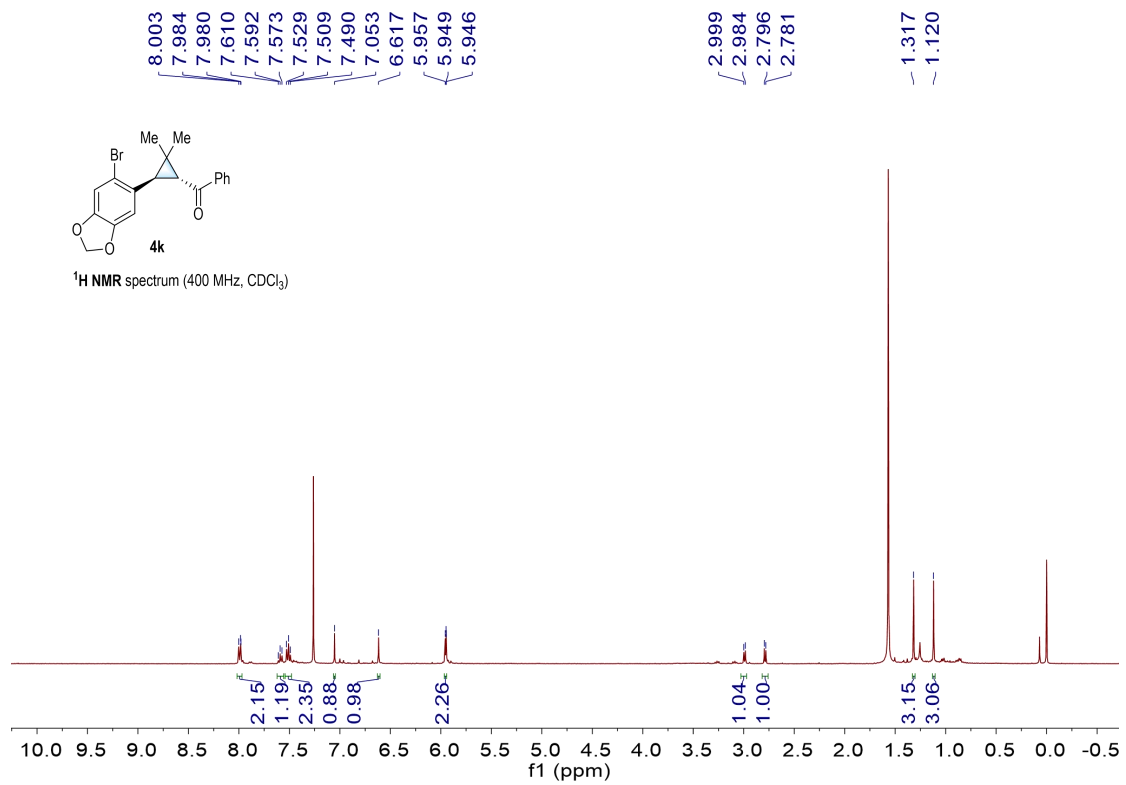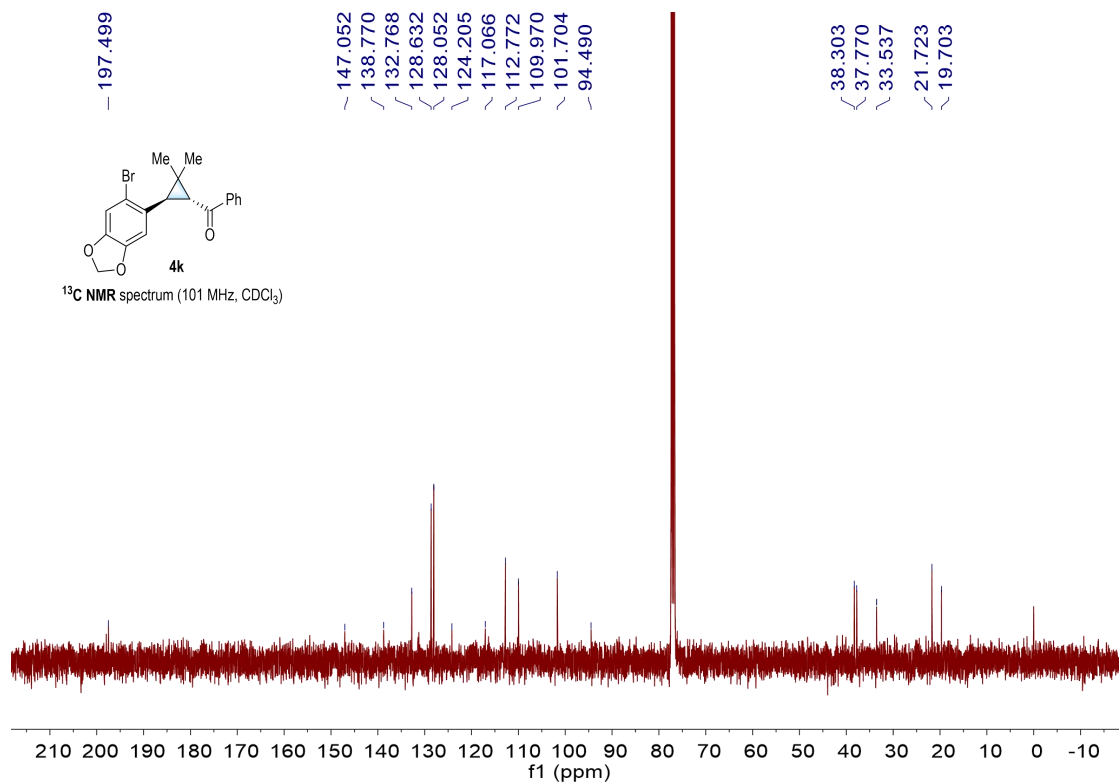

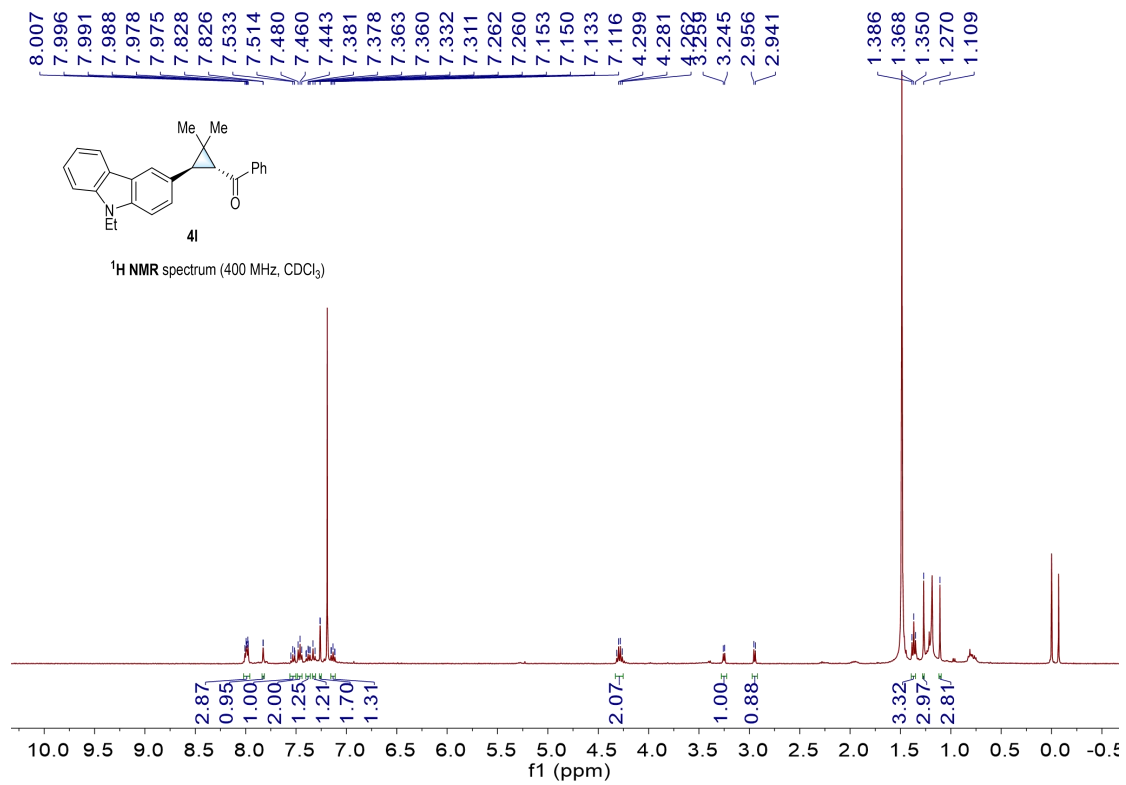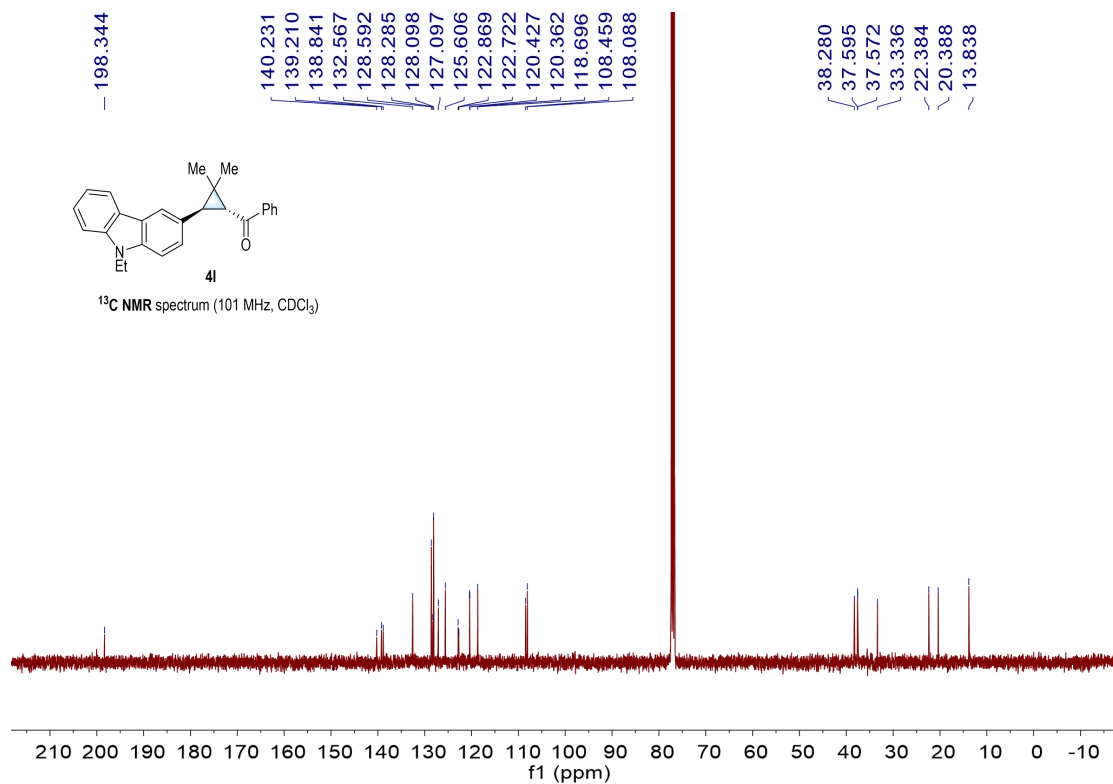

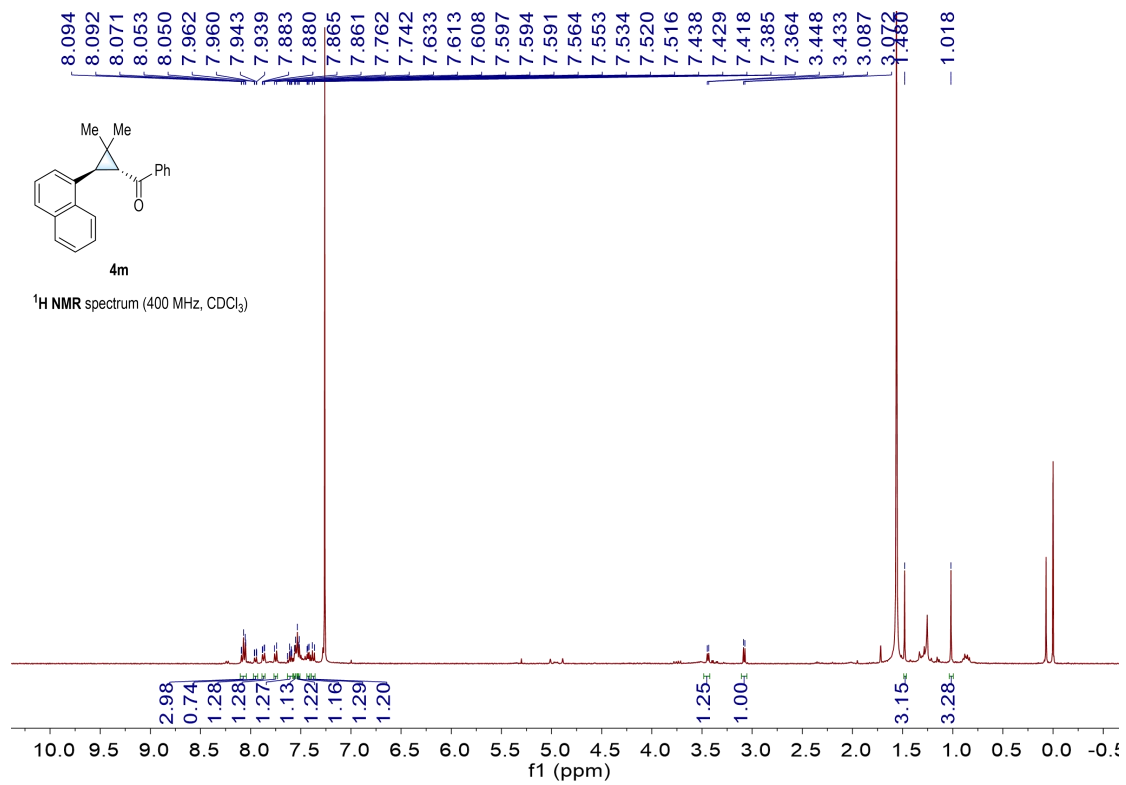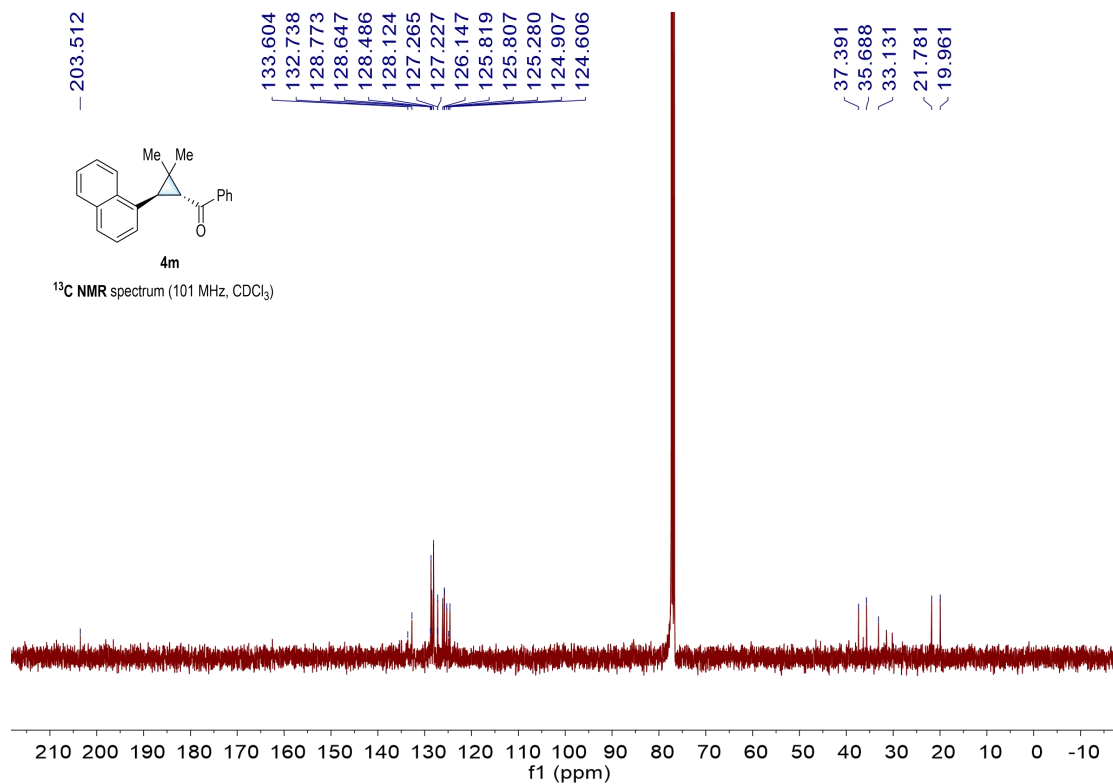

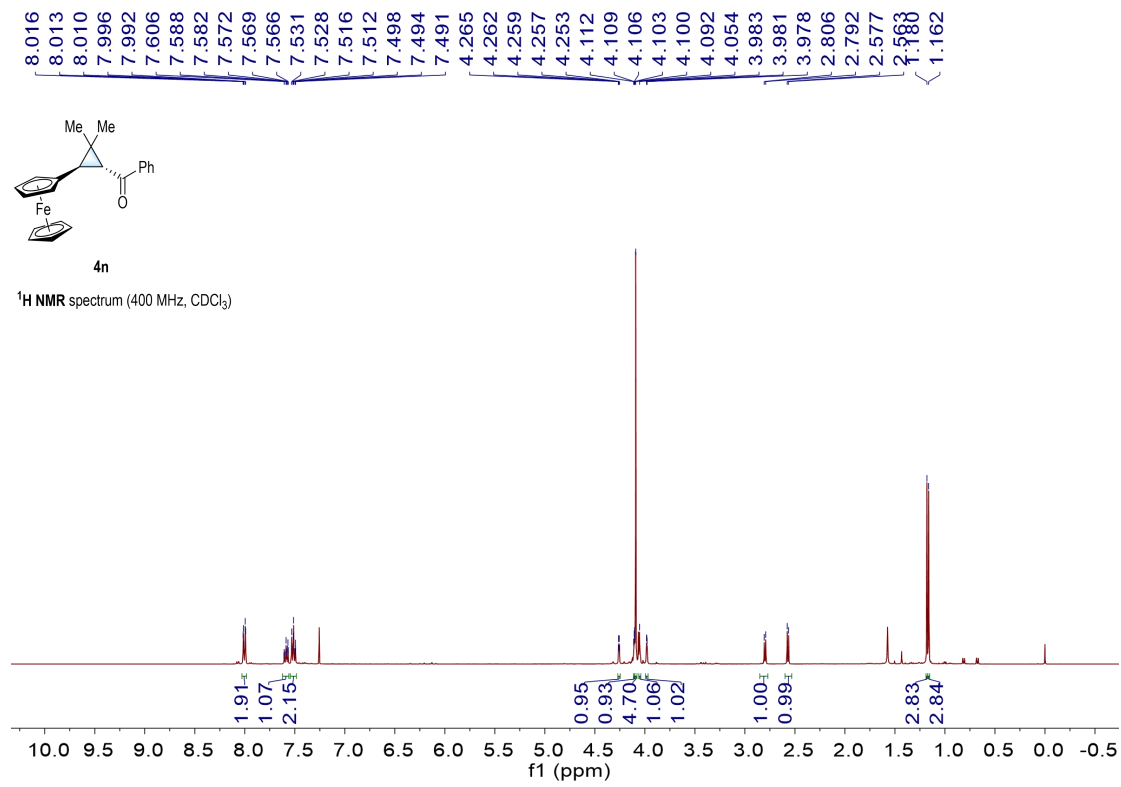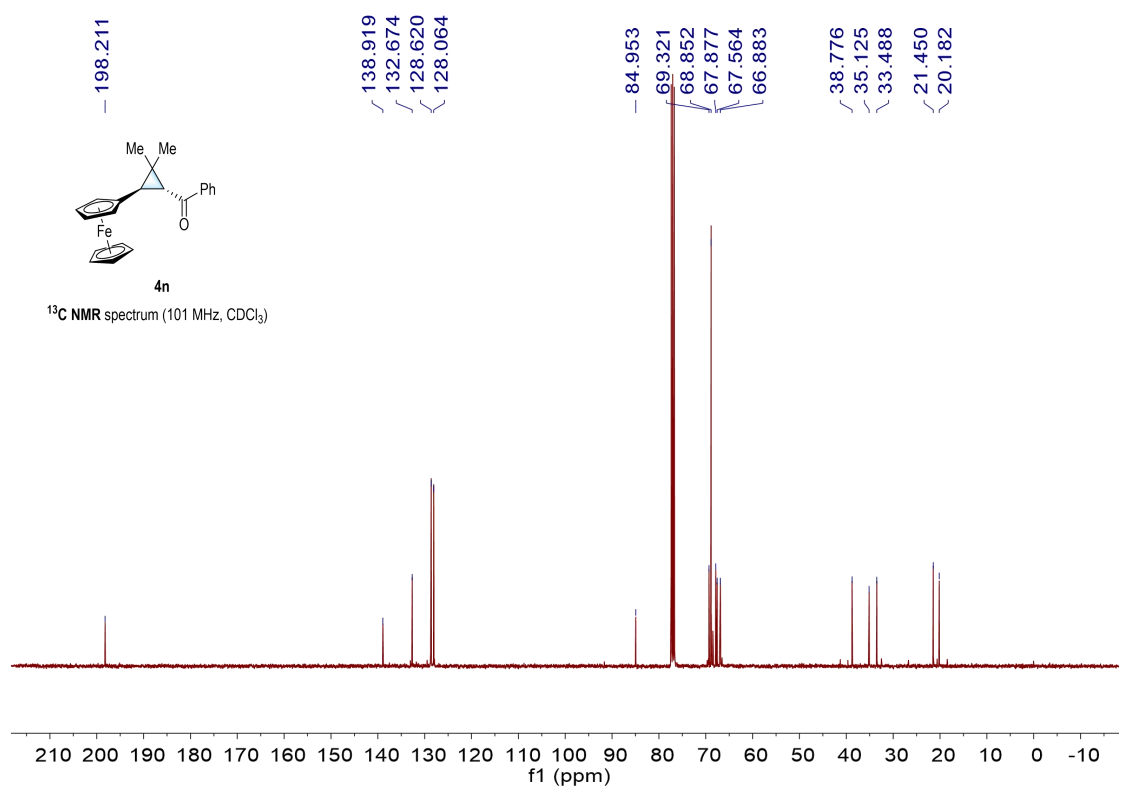

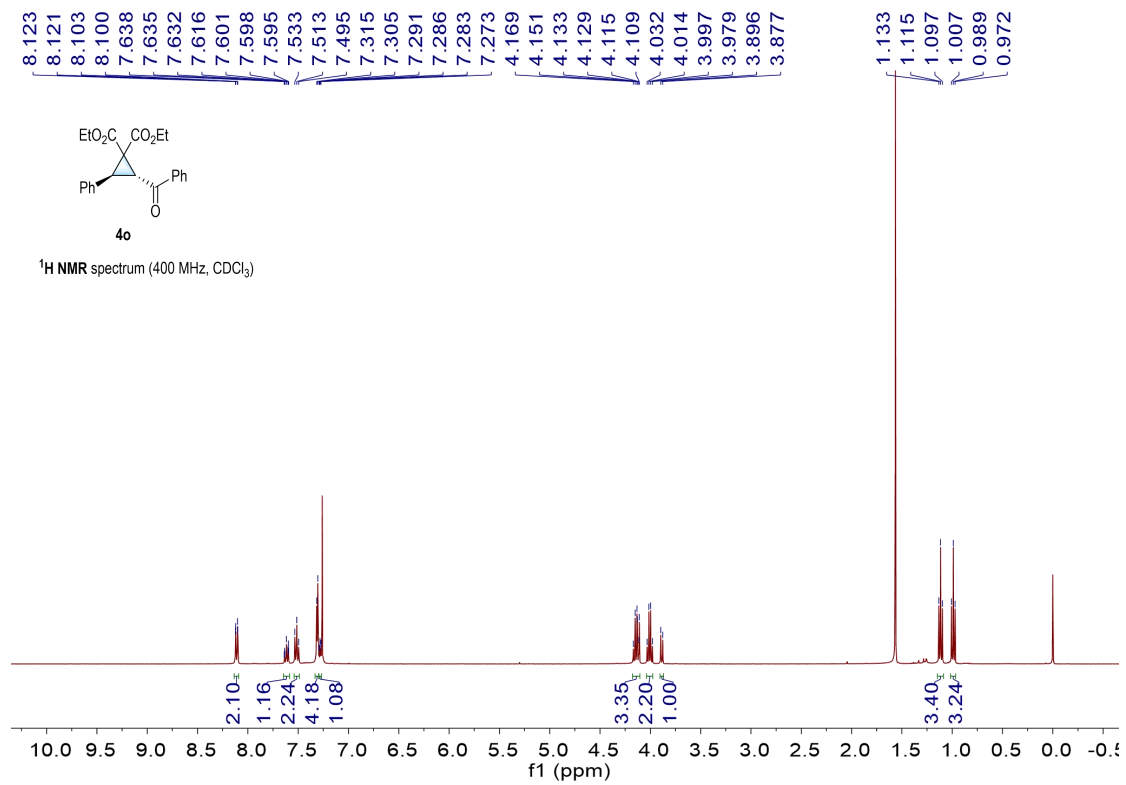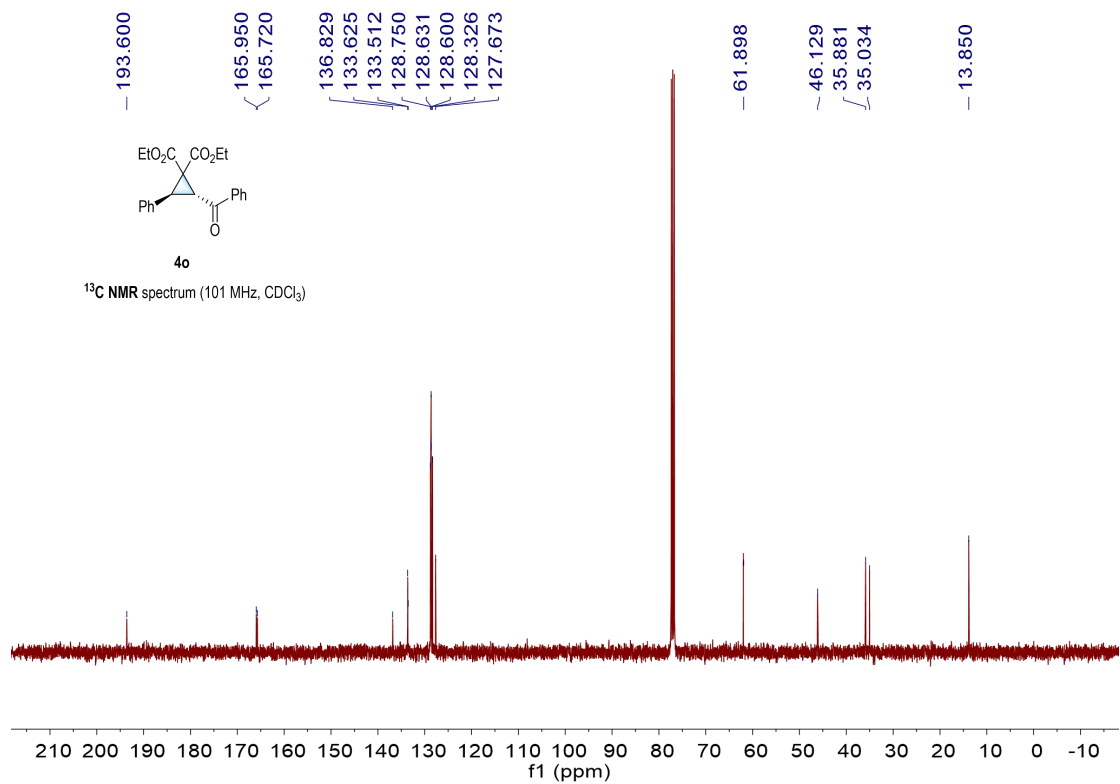

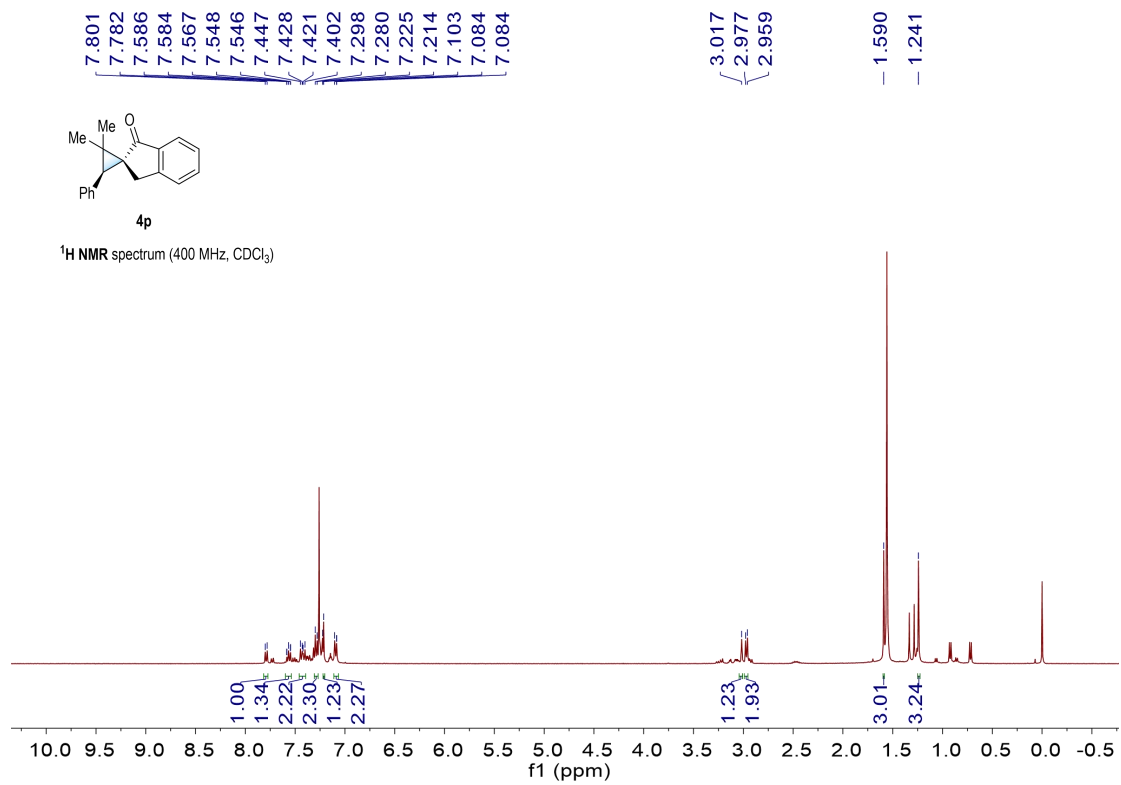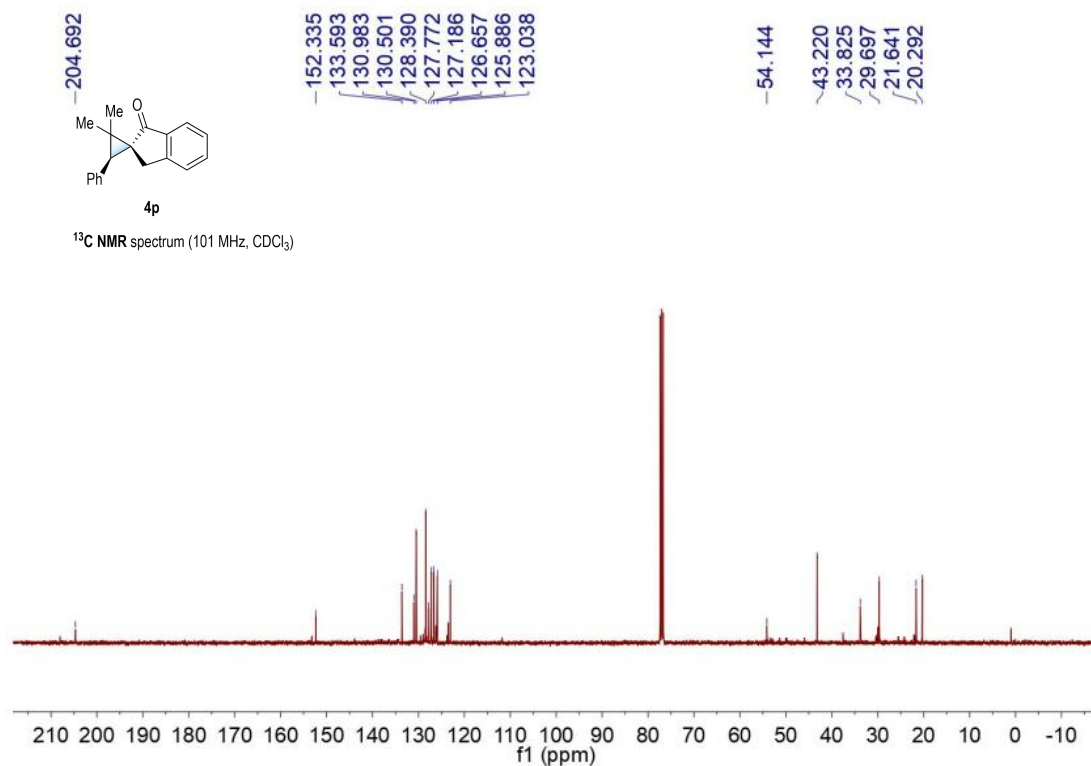

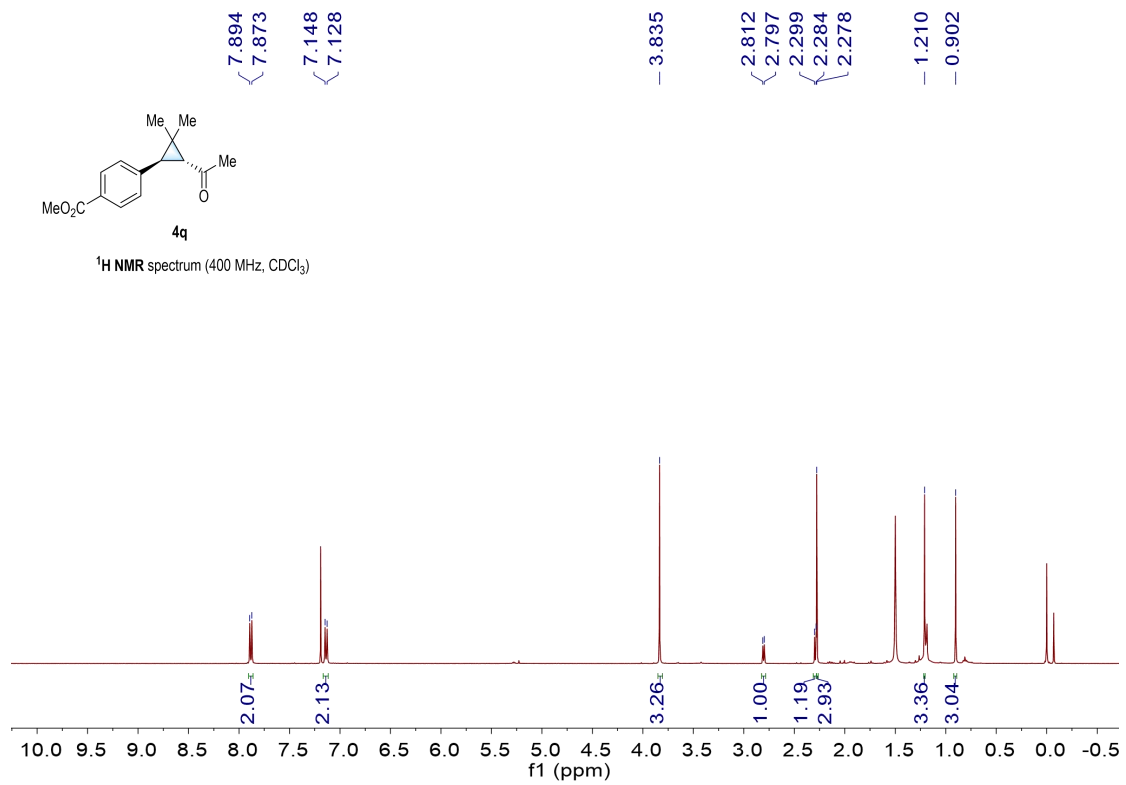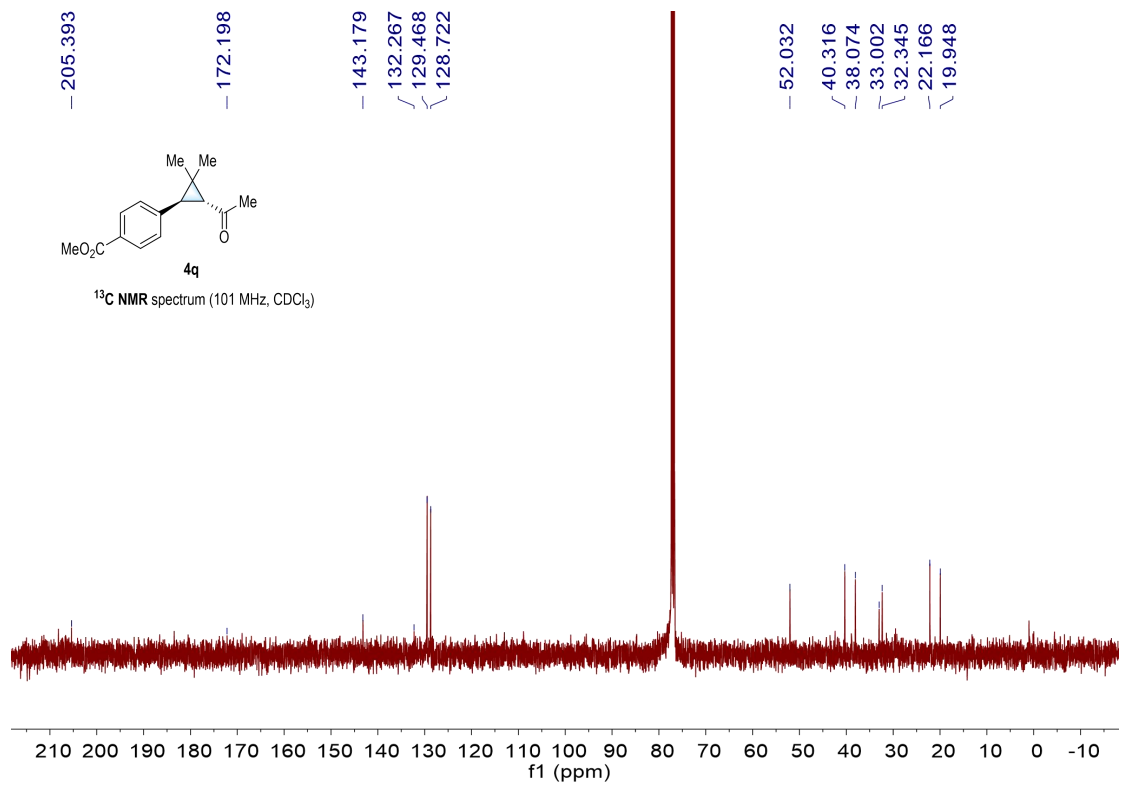

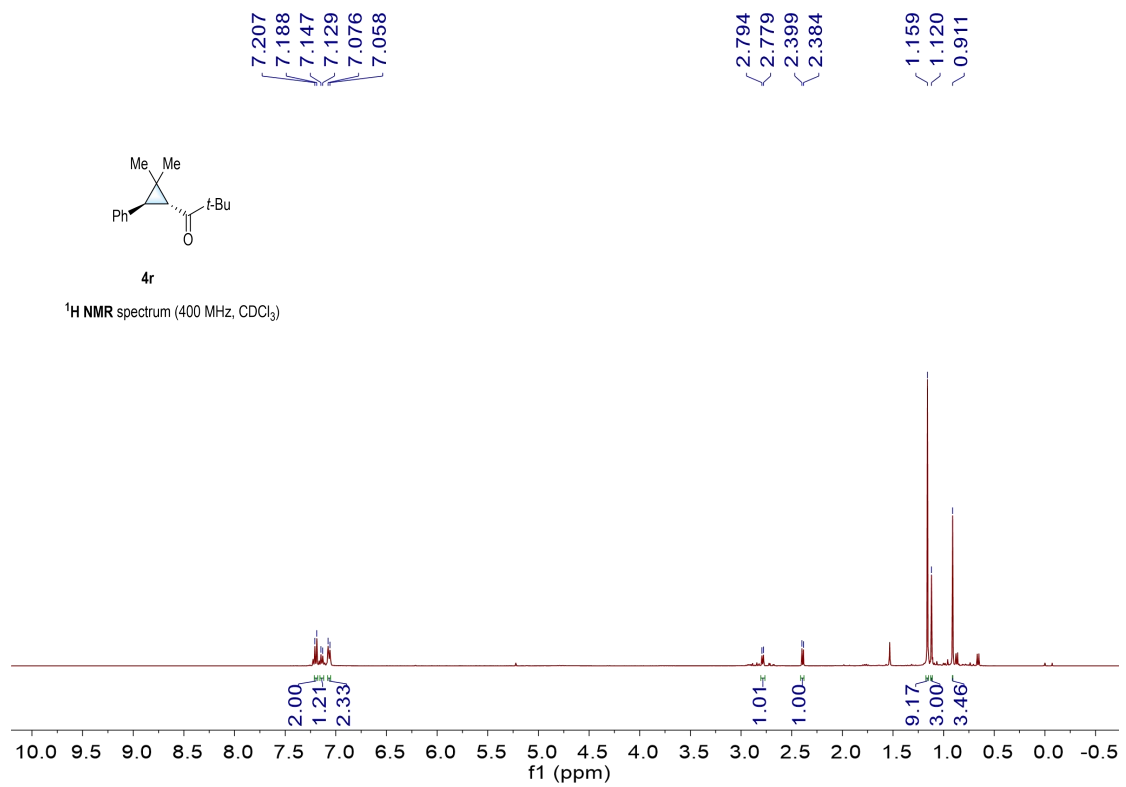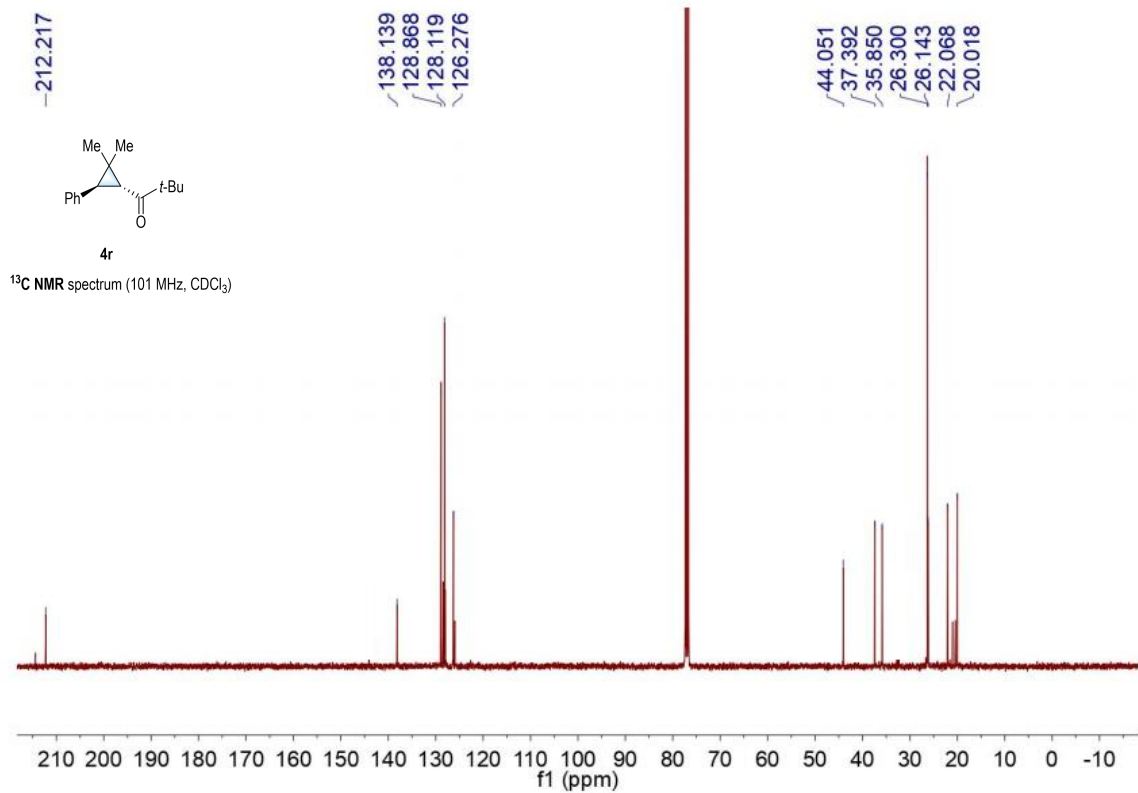

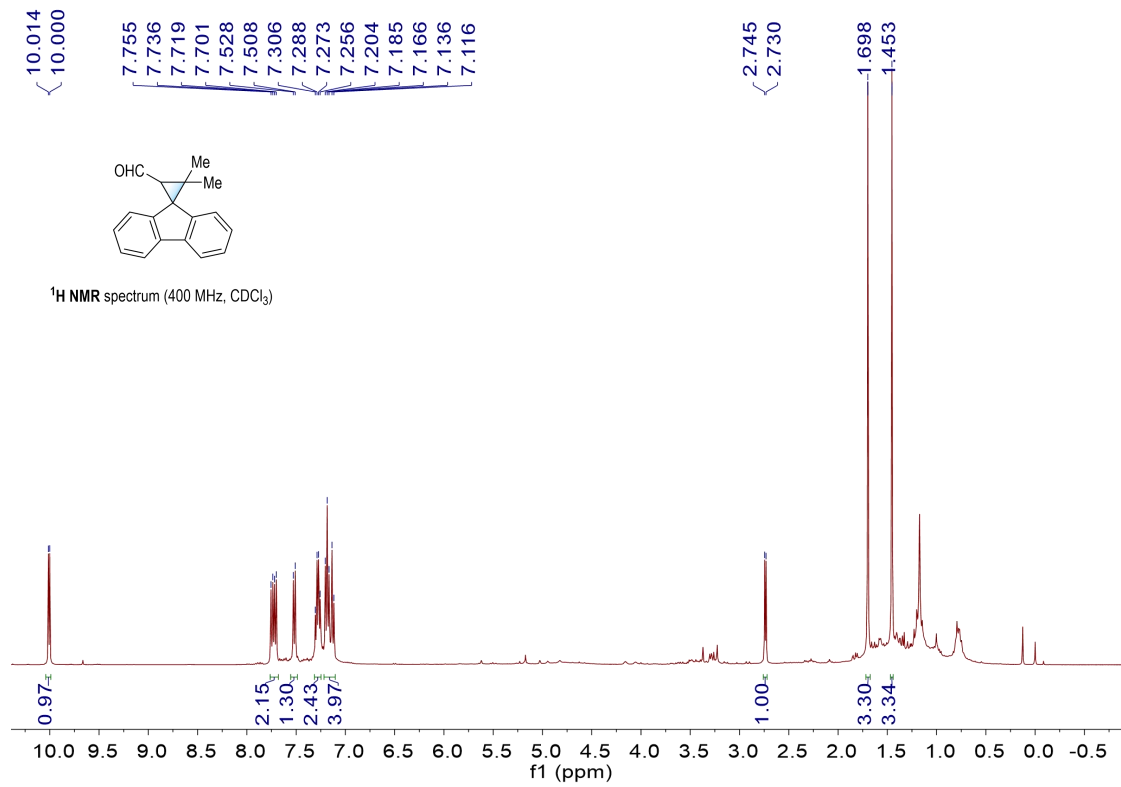

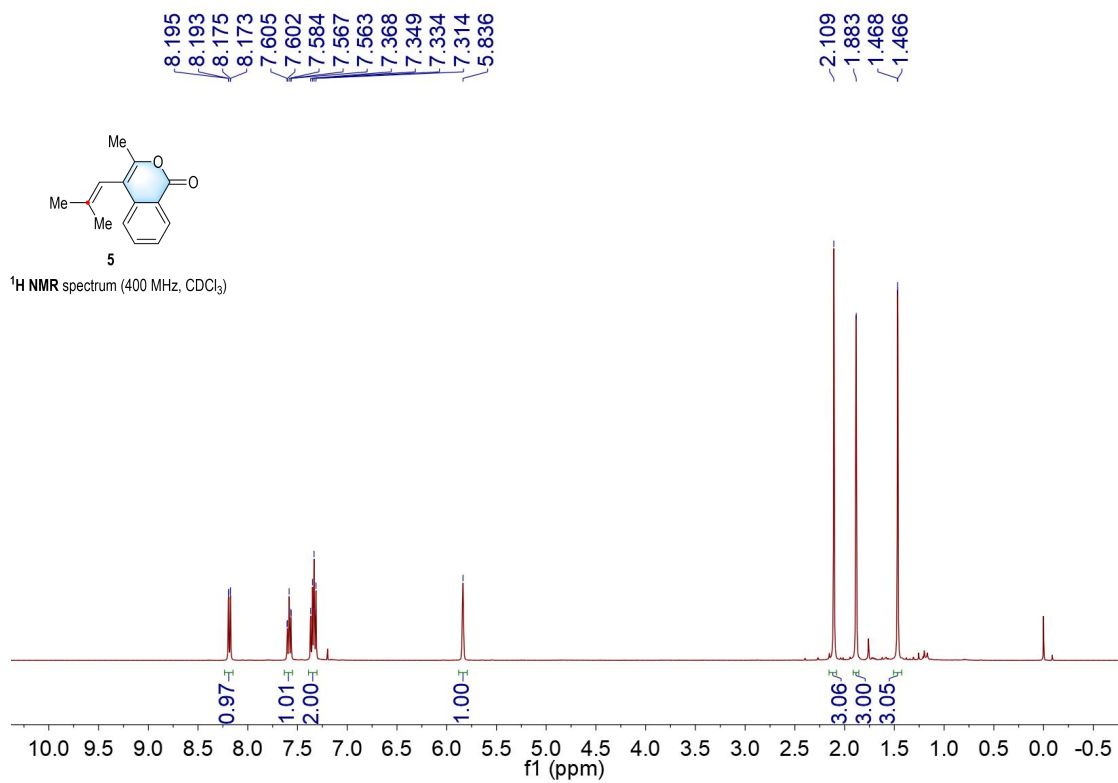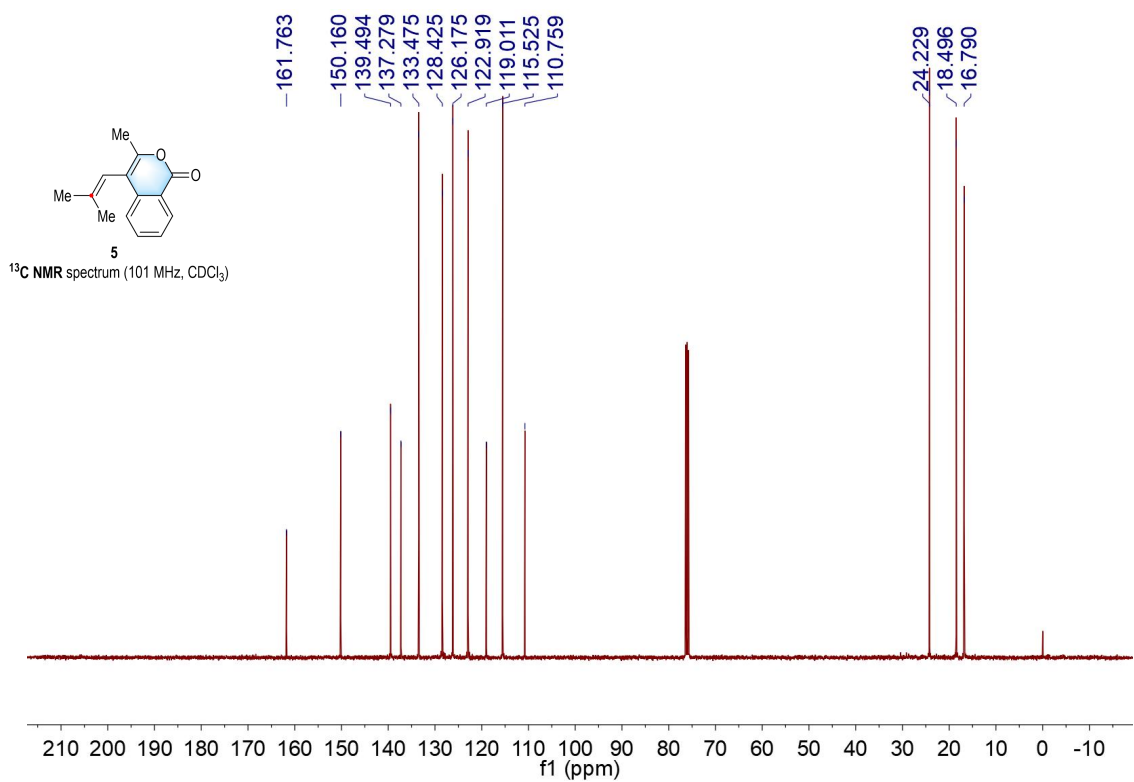

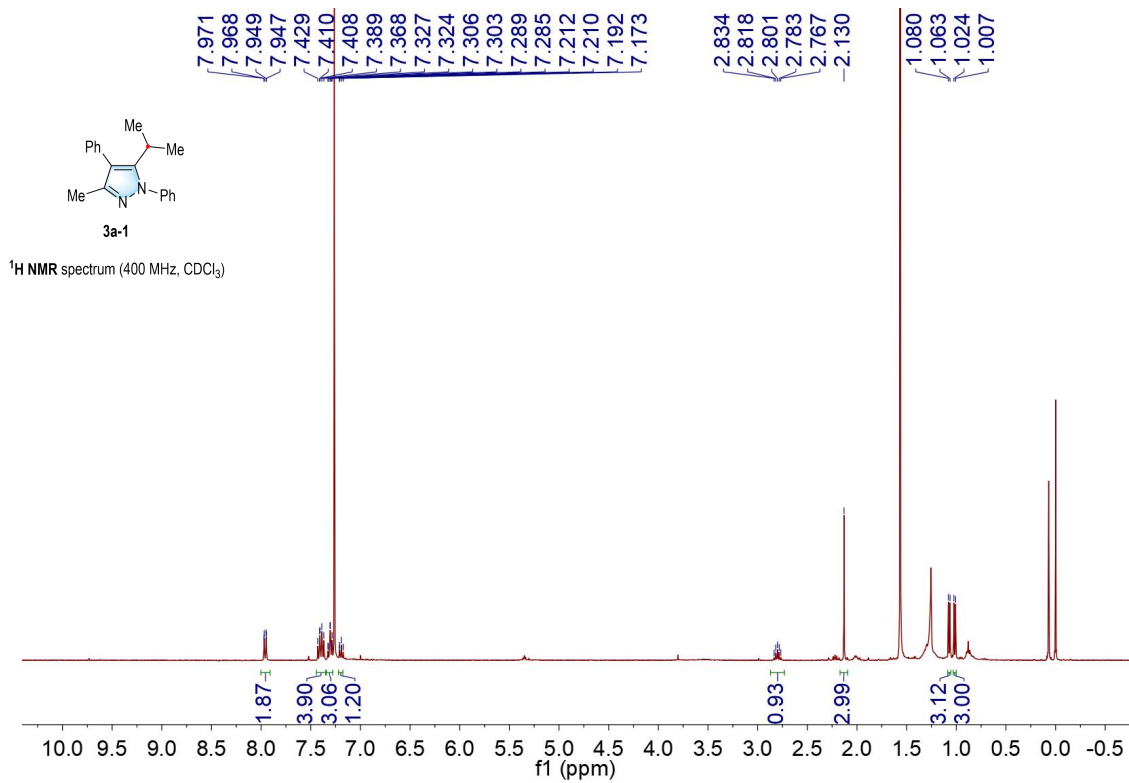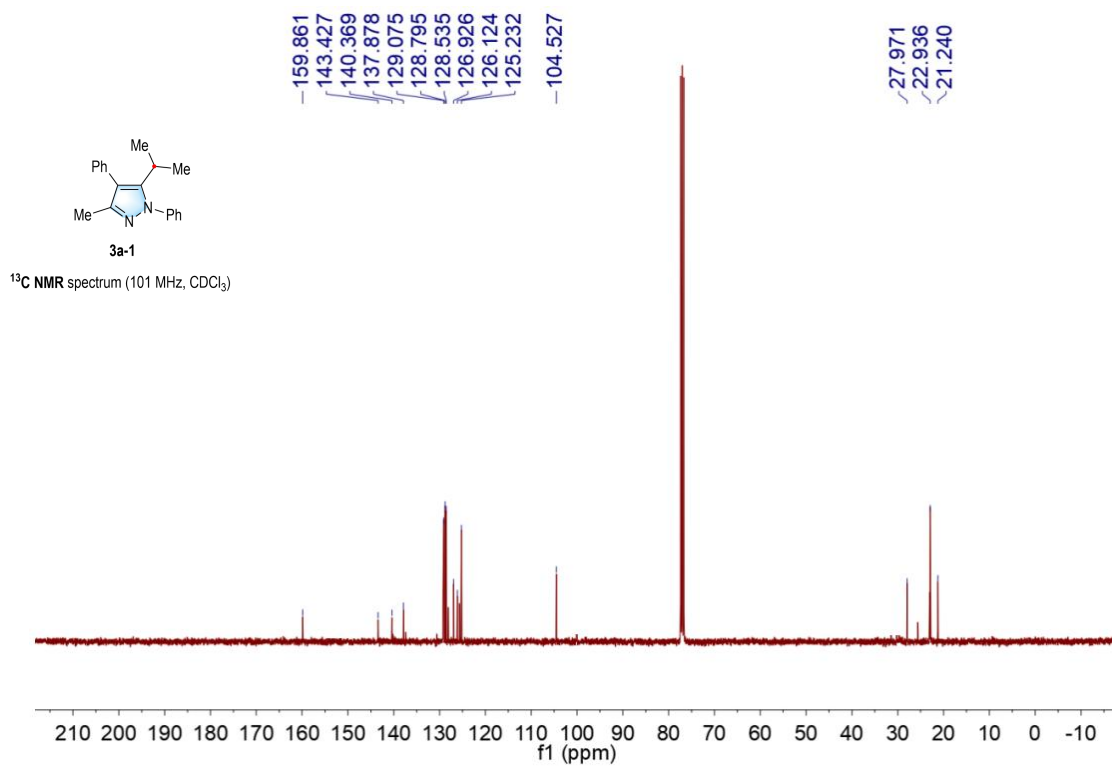

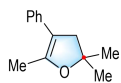

3a-2

<sup>1</sup>H NMR spectrum (400 MHz, CDCl<sub>3</sub>)

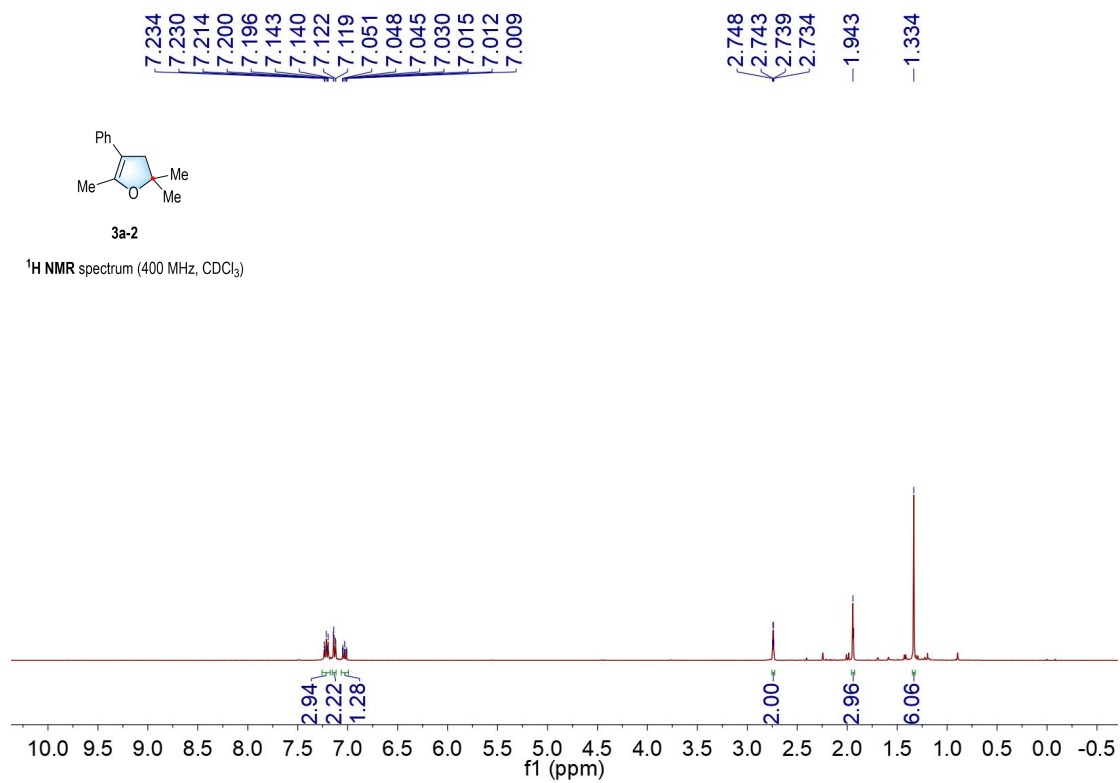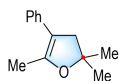

3a-2

<sup>13</sup>C NMR spectrum (101 MHz, CDCl<sub>3</sub>)

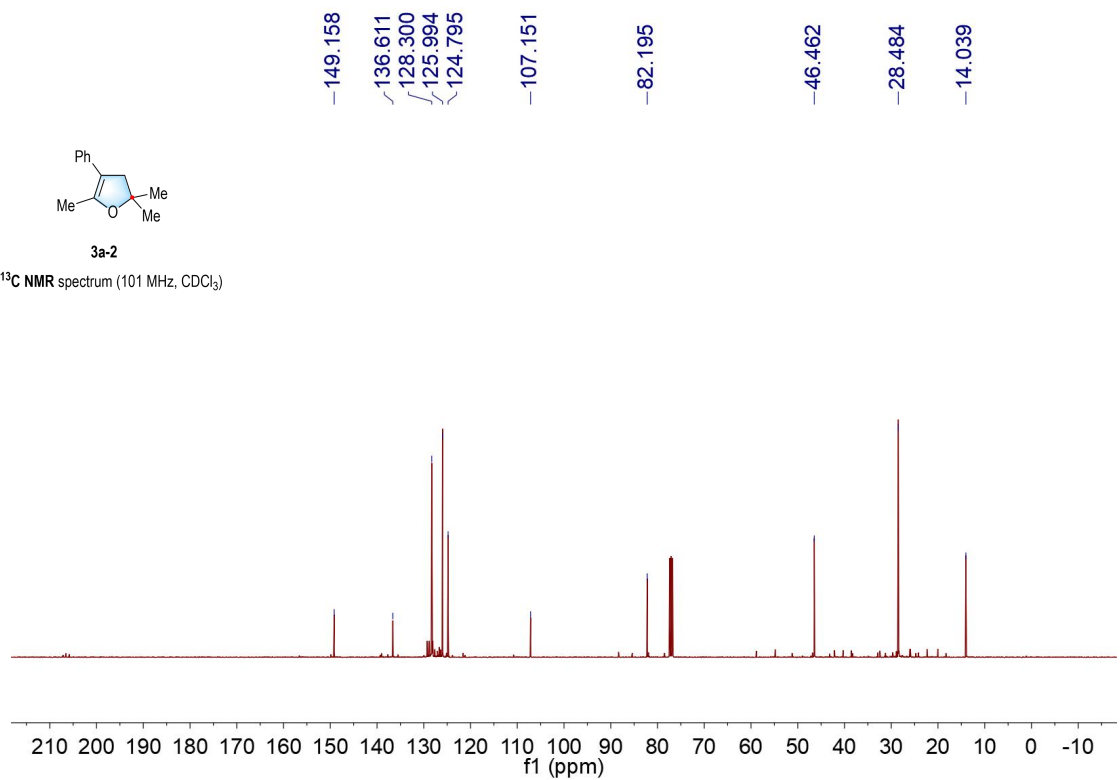

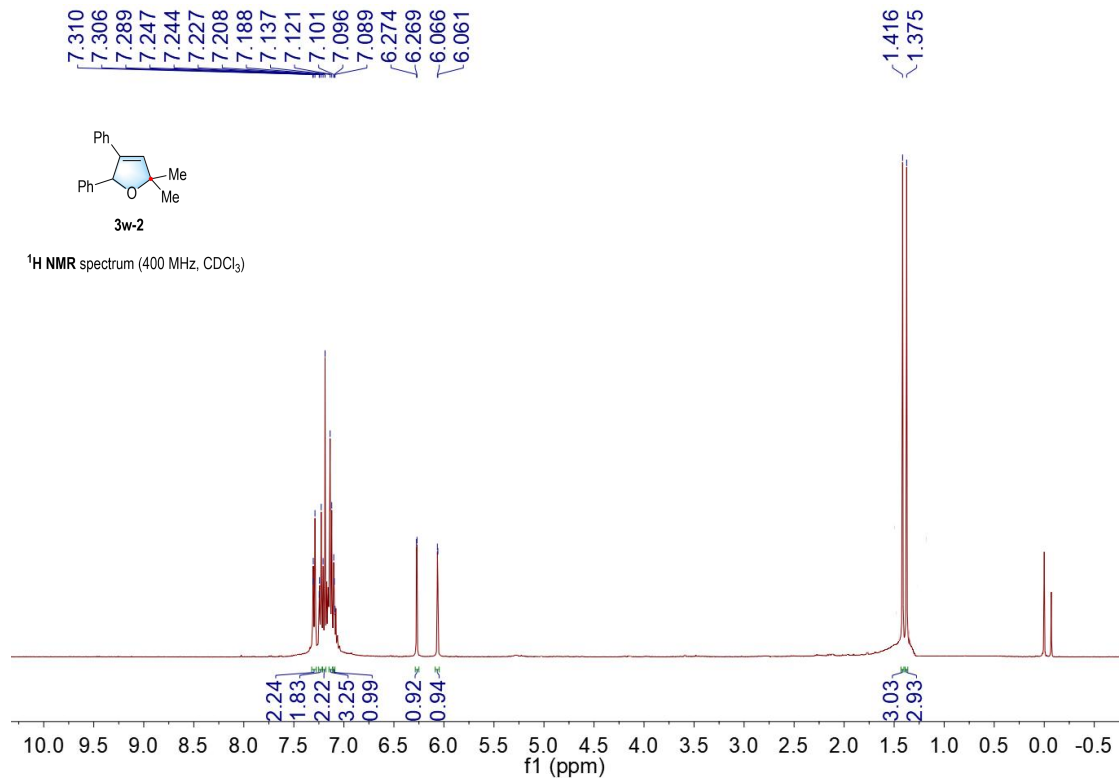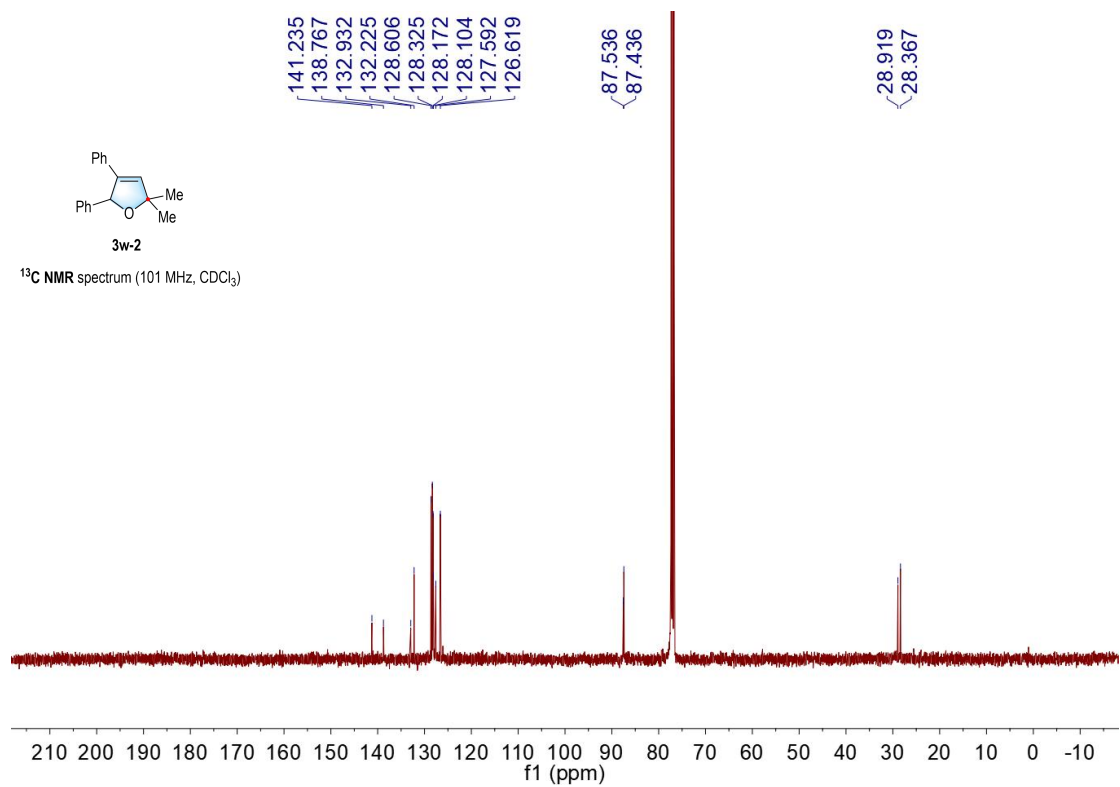

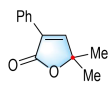

3o-1

<sup>1</sup>H NMR spectrum (400 MHz, CDCl<sub>3</sub>)

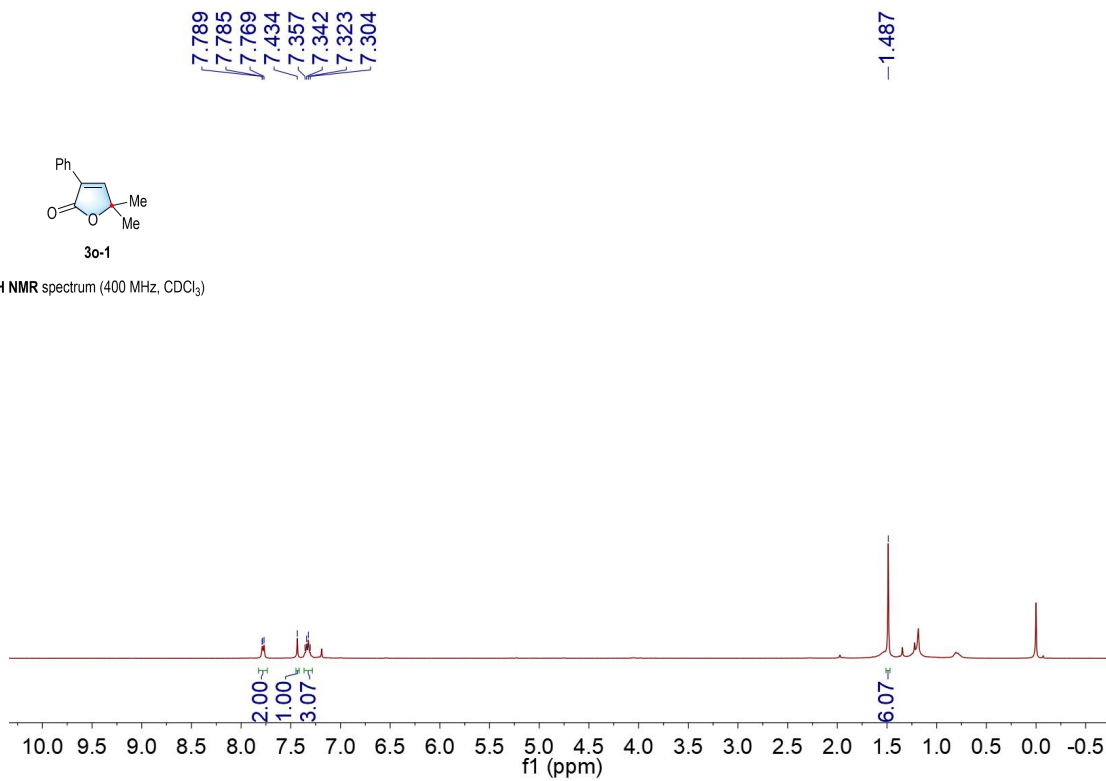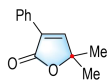

3o-1

<sup>13</sup>C NMR spectrum (101 MHz, CDCl<sub>3</sub>)

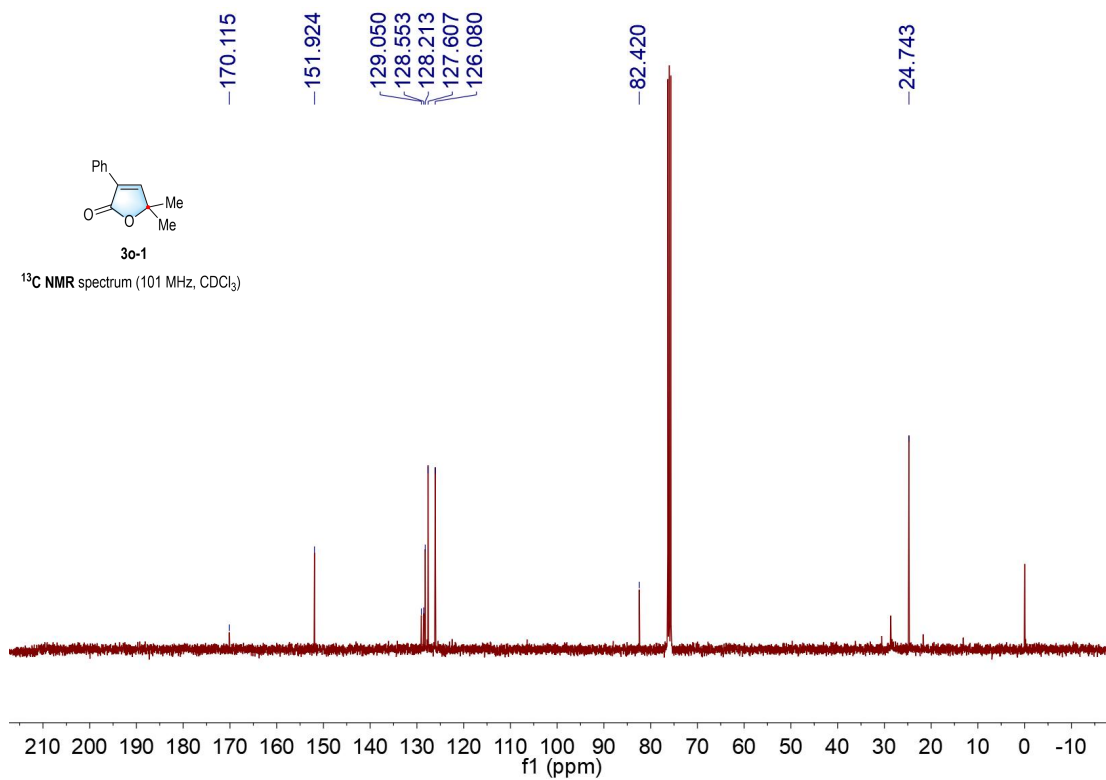

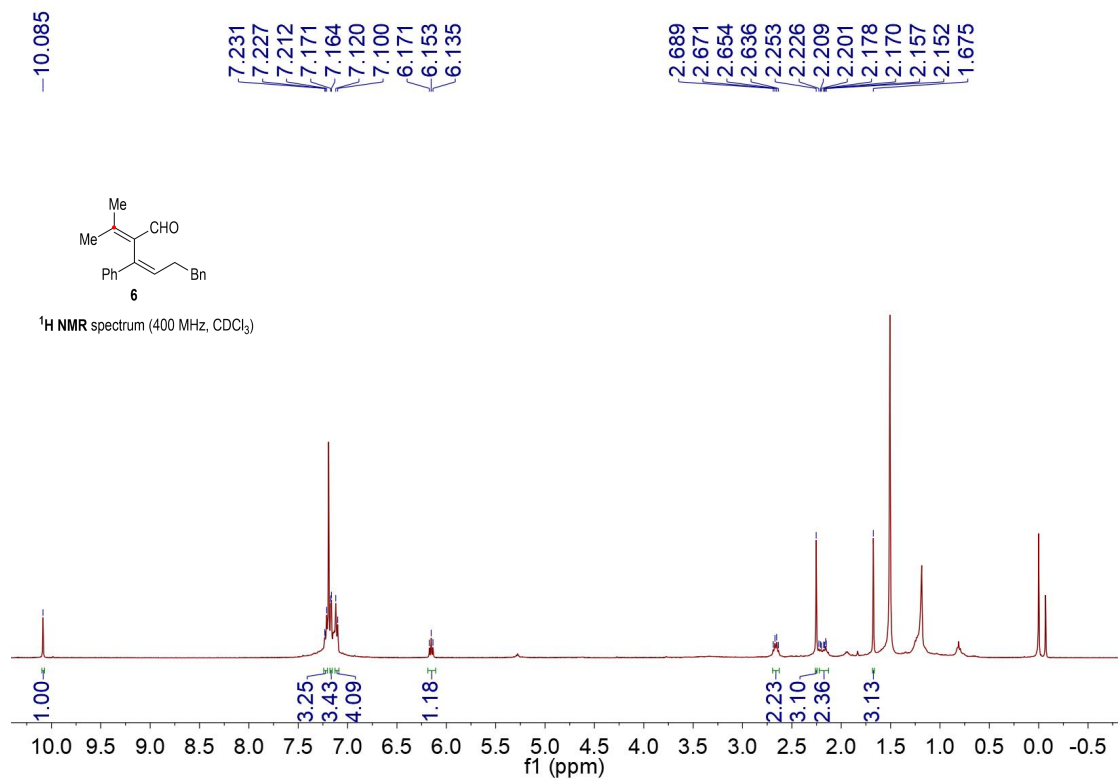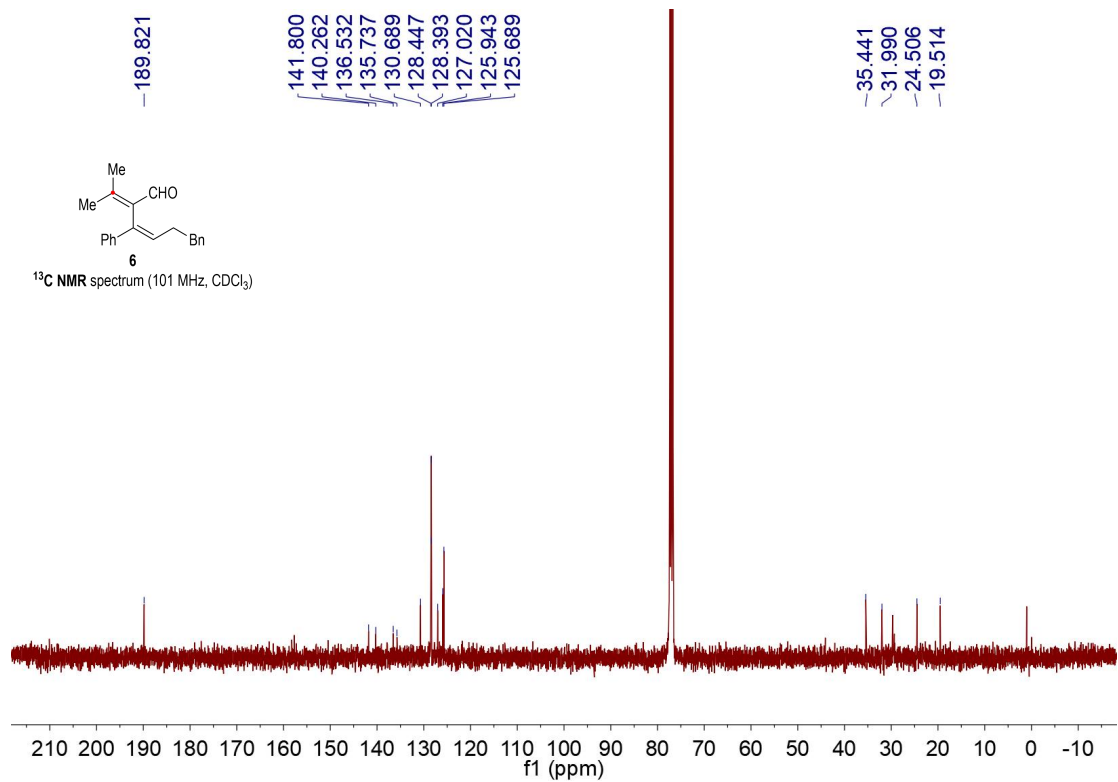

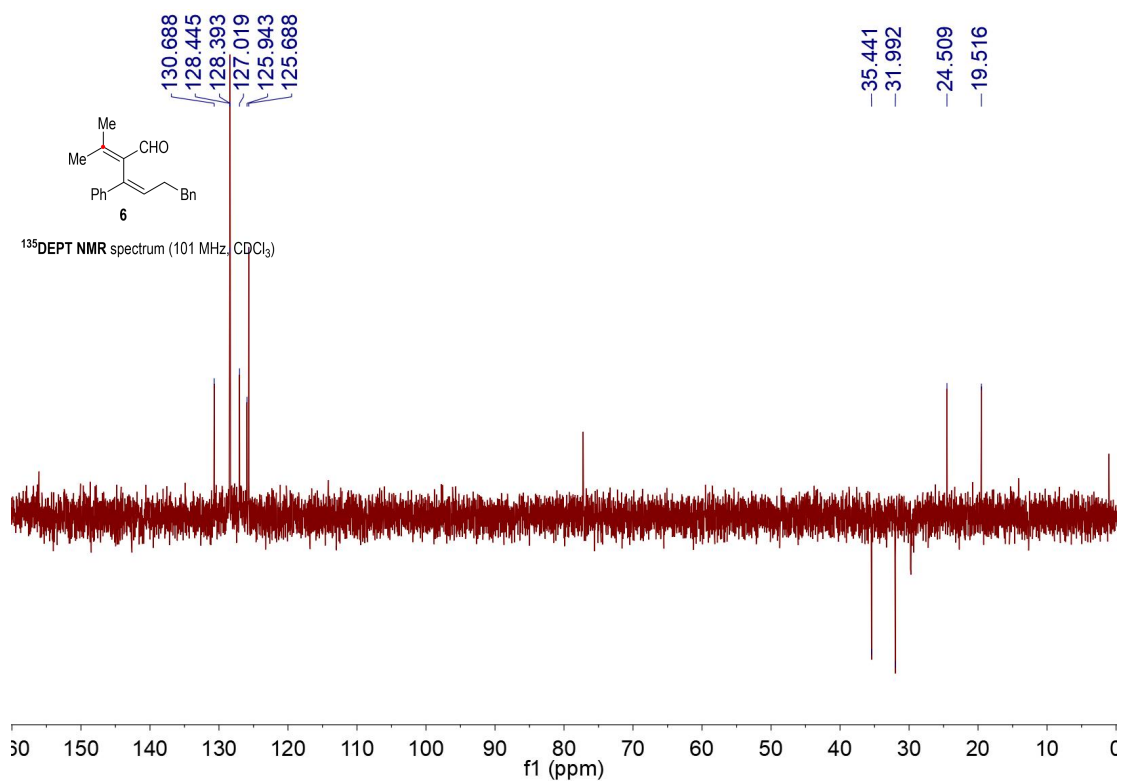

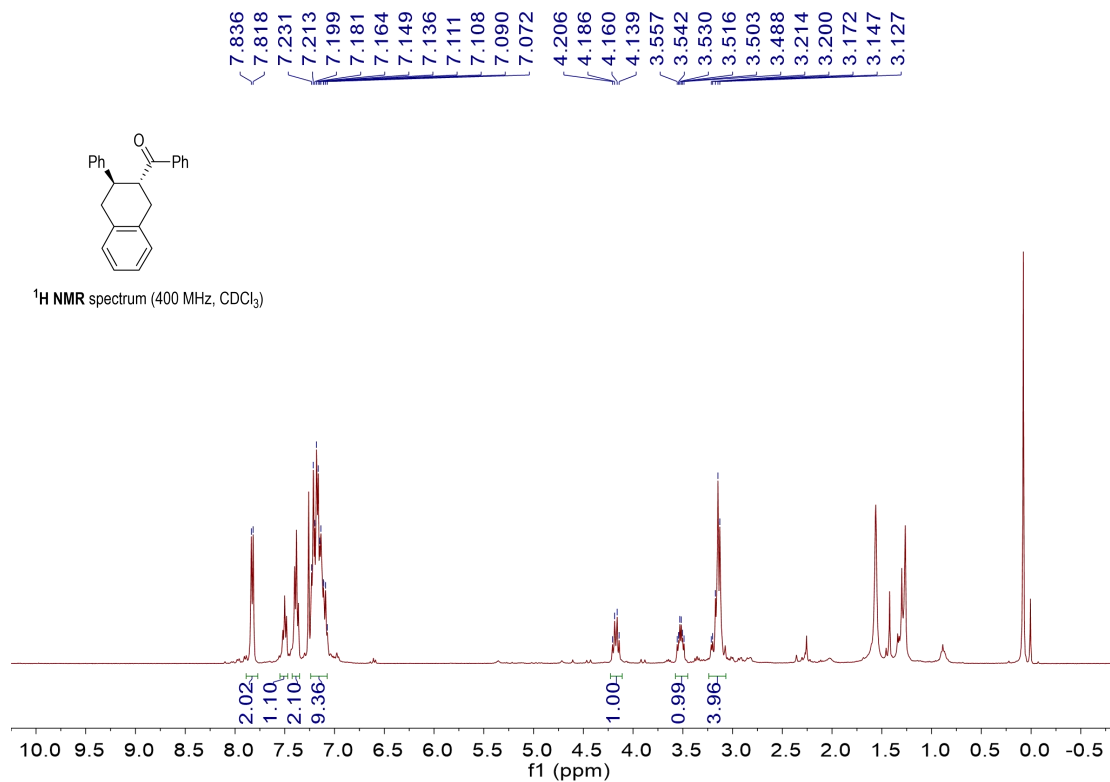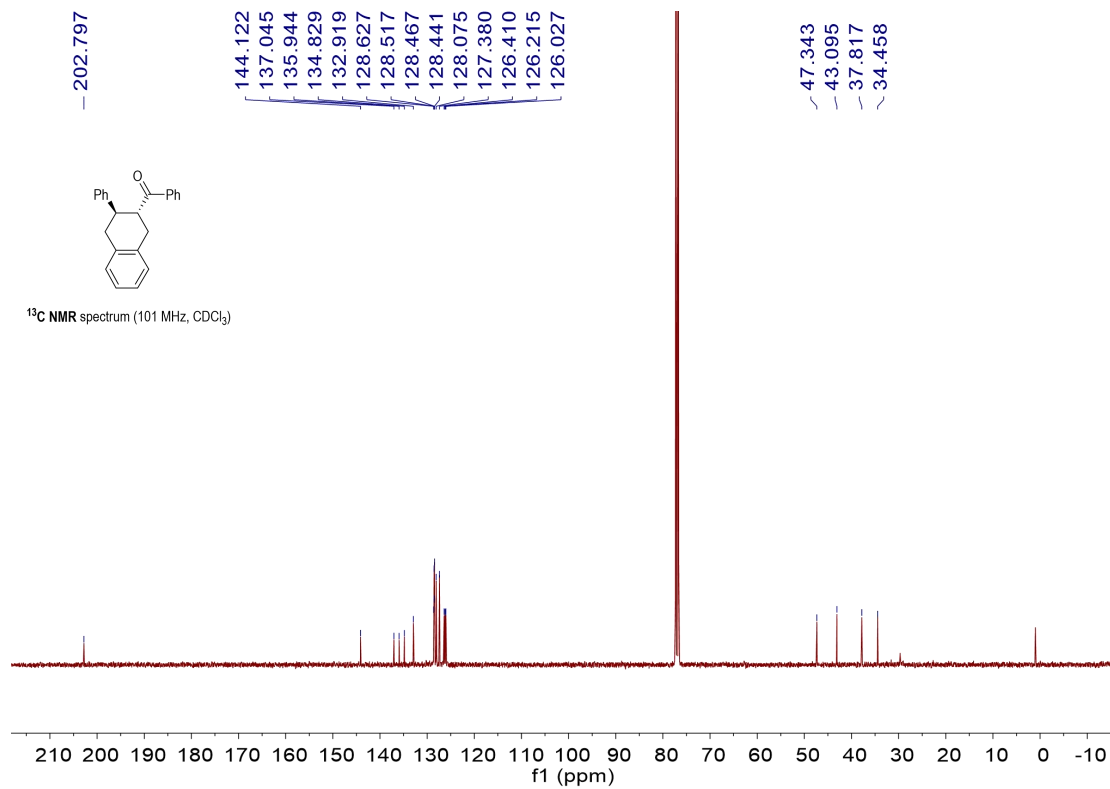

Supplement: d6sc01614f1.pdf [file d6sc01614f1.pdf]
